# Supplementary material for: Site‐Selective, Remote sp3 C−H Carboxylation Enabled by the Merger of Photoredox and Nickel Catalysis
Source: PubMed Central journal article supplement — Chemistry. 2019 Jun 6;25(38):9001–5. doi: 10.1002/chem.201902095 (PMC6773098; doi:10.1002/chem.201902095), 2019-06-06

# CHEMISTRY

## A **European** Journal

### Supporting Information

#### **Site-Selective, Remote $sp^3$ C–H Carboxylation Enabled by the Merger of Photoredox and Nickel Catalysis**

Basudev Sahoo<sup>+, [a]</sup> Peter Bellotti<sup>+, [a, b]</sup> Francisco Juliá-Hernández,<sup>[a]</sup> Qing-Yuan Meng,<sup>[a]</sup>  
Stefano Crespi,<sup>\*[a, b]</sup> Burkhard König,<sup>\*[a, b]</sup> and Ruben Martin<sup>\*[a, c]</sup>

chem\_201902095\_sm\_miscellaneous\_information.pdf

## Supporting Information

|          |                                                                         |            |
|----------|-------------------------------------------------------------------------|------------|
| <b>1</b> | <b>General information</b>                                              | <b>S3</b>  |
| <b>2</b> | <b>Synthesis of homobenzylic bromides</b>                               | <b>S6</b>  |
| <b>3</b> | <b>Synthesis of secondary alkyl bromides</b>                            | <b>S9</b>  |
| <b>4</b> | <b>Synthesis of nitrogen-donor ligands</b>                              | <b>S12</b> |
| <b>5</b> | <b>Synthesis of (L)NiBr<sub>2</sub> complexes</b>                       | <b>S14</b> |
| <b>6</b> | <b>Synthesis of additional reagents</b>                                 | <b>S17</b> |
| <b>7</b> | <b>Optimizations of reaction conditions</b>                             |            |
| 7.1      | General procedure for the photocarboxylation of 1a with CO <sub>2</sub> | S18        |
| 7.2      | General procedure for the photocarboxylation of 3a with CO <sub>2</sub> | S19        |
| <b>8</b> | <b>Photocarboxylation of alkyl bromides with CO<sub>2</sub></b>         |            |
| 8.1      | Photocarboxylation reactions en route to aryl acetic acids              | S21        |
| 8.1.1    | General procedure                                                       | S21        |
| 8.1.2    | Characterization data                                                   | S22        |
| 8.1.3    | Scale up photocarboxylation reaction of 1a                              | S31        |
| 8.1.4    | Additional examples                                                     | S32        |
| 8.2      | Photocarboxylation reactions en route to primary carboxylic acids       | S34        |
| 8.2.1    | General procedure                                                       | S34        |
| 8.2.2    | Characterization data                                                   | S35        |
| 8.2.3    | Regioconvergent photocarboxylation of <i>n</i> -heptane                 | S42        |
| 8.2.4    | Regioconvergent photocarboxylation of bromoheptanes                     | S43        |
| <b>9</b> | <b>Mechanistic Investigation</b>                                        |            |
| 9.1      | Photocarboxylation of homobenzylic bromides                             | S44        |
| 9.1.1    | Kinetic profile of the model reaction                                   | S44        |
| 9.1.2    | Intermittent illumination experiment                                    | S45        |
| 9.1.3    | Deuterium labelling experiments                                         | S46        |
| 9.1.4    | Radical inhibition experiment                                           | S50        |
| 9.1.5    | Cyclic voltammetric (CV) measurements of (L1)NiBr <sub>2</sub>          | S51        |
| 9.1.6    | Time-resolved UV-Vis experiments                                        | S53        |
| 9.2      | Photocarboxylation of unactivated secondary alkyl bromides              | S57        |
| 9.2.1    | Deuterium labelling experiment                                          | S57        |
| 9.2.2    | Radical inhibition experiment                                           | S58        |

|       |                                                                          |      |
|-------|--------------------------------------------------------------------------|------|
| 9.2.3 | Cyclic voltammetric (CV) measurements of (L7)NiBr <sub>2</sub>           | S58  |
| 9.2.4 | Time-resolved UV-Vis experiments                                         | S61  |
| 9.3   | DFT calculations                                                         | S64  |
| 9.3.1 | Calculated intermediates and transition states for (L7)NiBr <sub>2</sub> | S65  |
| 9.3.2 | Calculated intermediates and transition states for (L1)NiBr <sub>2</sub> | S67  |
| 9.3.3 | Uncatalyzed chain-walking process of homobenzylic radical                | S68  |
| 9.3.4 | Cartesian coordinates                                                    | S70  |
| 10    | References                                                               | S157 |
| 11    | NMR Spectra                                                              | S160 |

## 1 General Information

**Analytic Methods:** All NMR spectra were recorded at 294 K using Bruker 300, Bruker 400, and Bruker 500 MHz and DEU 400 NMR tubes from Deutero GmbH. The following deuterated solvent, purchased from Deutero GmbH or Sigma-Aldrich (minimal deuteration in brackets), were used: CDCl<sub>3</sub> (99.8%), acetone-*d*<sub>6</sub> (99.8%), DMSO-*d*<sub>6</sub> (99.8%), D<sub>2</sub>O (99.9%). All chemical shifts ( $\delta$ ) are reported in parts per million (ppm) down field of tetramethylsilane (TMS). The coupling constant (*J*) is reported in Hertz (Hz). For <sup>1</sup>H and <sup>13</sup>C spectra, the residual solvent peak was used as internal reference (CDCl<sub>3</sub>:  $\delta_{\text{H}} = 7.26$  ppm,  $\delta_{\text{C}} = 77.16$  ppm; Acetone-*d*<sub>6</sub>:  $\delta_{\text{H}} = 2.05$  ppm,  $\delta_{\text{C}} = 29.84$  ppm; DMSO-*d*<sub>6</sub>:  $\delta_{\text{H}} = 2.50$  ppm,  $\delta_{\text{C}} = 39.52$  ppm; D<sub>2</sub>O:  $\delta_{\text{H}} = 4.79$  ppm), while for <sup>19</sup>F spectra the absolute referencing to the <sup>1</sup>H spectrum was used, as suggested by the IUPAC. The following abbreviations are used for signal multiplicity: bs = broad signal, s = singlet, d = doublet, t = triplet, q = quartet, dd = doublet of doublets, dt = doublet of triplets, dq = doublet of quartets, tt = triplet of triplets, m = multiplet. Melting points were measured using open glass capillaries in a Büchi B540 apparatus. Infrared spectra (FT-IR) measurements were carried out on a Bruker Optics FT-IR Alpha spectrometer equipped with a DTGS detector, KBr beamsplitter at 4 cm<sup>-1</sup> resolution using a one bounce ATR accessory with diamond windows (ICIQ) or on an Agilent Cary-630 benchtop spectrometer (Universität Regensburg). Mass spectra were recorded on a Waters LCT Premier spectrometer or in a MicroTOF Focus, Bruker Daltonics spectrometer at ICIQ and Jeol AccuTOF GCX, Agilent Q-TOF 6540 UHD, Finnigan MAT SSQ 710 A and ThermoQuest Finnigan TSQ 7000 at the Faculty of Chemistry and Pharmacy, Universität Regensburg. Elemental analysis measurements were obtained from the central analytic elemental analysis facilities (Vario MICRO Cube from Elementar Analysensysteme GmbH) of the Faculty of Chemistry and Pharmacy, Universität Regensburg. UV-VIS measurements were performed with an Agilent Cary 100 spectrometer using Hellma Analytics QS-High Precision Cell (Quartz glass, light-path: 10 mm). GC-FID measurements were performed using a Supelco 44176-01-C. equipped with a Nukol capillary column (44176-01-C, 15 m × 320  $\mu\text{m}$  × 0.25  $\mu\text{m}$  film) using helium as carrier gas (1 ml·min<sup>-1</sup> flow. The data acquisition and evaluation were carried out using Agilent ChemStation Rev.B.02.01-SR2 [260]. Parameters: split ratio: 20:1, injection volume: 0.2  $\mu\text{l}$ , inlet temperature: 280°C. Temperature ramp: hold 80°C for 1 minutes, gradient 15 °C·min<sup>-1</sup> until 200 °C, hold for 3 minutes.

**Reagents and methods:** The chemicals were purchased from ACROS Organics, Sigma-Aldrich, Merck, TCI chemicals, ABCR, Alfa Aesar, Fluka and Fluorochem and used as received, unless otherwise stated. CO<sub>2</sub> was provided by Linde and dried by passing it through a Drierite<sup>®</sup> (CaSO<sub>4</sub>) column. Reaction temperatures are referred to the temperature of the heating medium, unless otherwise stated. Technical grade solvents were purified as following: ethyl acetate, petroleum ether 40-60, dichloromethane, diethyl ether were purified by distillation. The following dry solvents were stored under molecular sieves with septa under nitrogen atmosphere and withdrawn using a syringe under positive nitrogen pressure: THF (from ACROS Organics), *N,N*-DMF (from ACROS Organics). Dry toluene (from Fischer scientific, analytical grade), diethyl ether (Aldrich) and MeCN (Carl ROTH) were prepared as following: 4 Å molecular sieves (20 % w/w) or 3 Å molecular sieves (for MeCN) were dried by heating at 250°C under approx. 10<sup>-2</sup> mbar of pressure for at least one hour, then the analytical grade solvent was added and the flask was sealed under nitrogen atmosphere.

Flash chromatographic purifications were carried with the following stationary phases: MP alumina B – Super I (basic alumina) and MB alumina N – Super I (neutral alumina) from MP Biochemicals, Silica Gel 60M (Macherey-Nagel, 40-63 µm, 230-400 mesh) (using a Biotage<sup>®</sup> Isolera<sup>™</sup> Spektra One automated system) or EM Science silica gel 60 (230-400 mesh). Reactions were monitored by TLC using Macherey-Nagel ALUGRAM<sup>®</sup> Xtra SIL G/UV254 aluminum plates, under UV visualization (254 or 366 nm), potassium permanganate or bromocresol green staining.

Benzylic photocarboxylation reactions were performed with 455 nm LEDs (OSRAM Oslon<sup>®</sup> SSL 80 royal- blue LEDs), which were installed at the bottom of a custom-made 6 vials holder (the distance between the flat-bottom of the vial and the light source was measured to be ~7 mm), equipped with a liquid cooling system (the thermostat was set @ 25°C) and a magnetic stirrer (~ 250 rpm). Primary carboxylation reactions were performed with 451 nm LEDs (OSRAM Oslon<sup>®</sup> SSL 80 royal- blue LEDs), which were installed at the bottom of a custom-made 8 flat-bottom Schlenk tubes holder (the distance between the flat-bottom Schlenk tube and the light source was measured to be ~7 mm), equipped with a liquid cooling system (the thermostat was set @ 10°C) and a magnetic stirrer (~ 500 rpm).

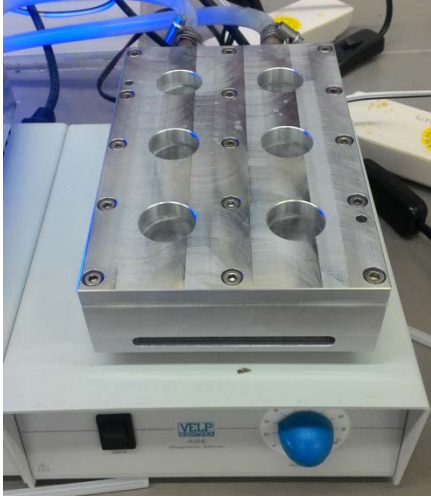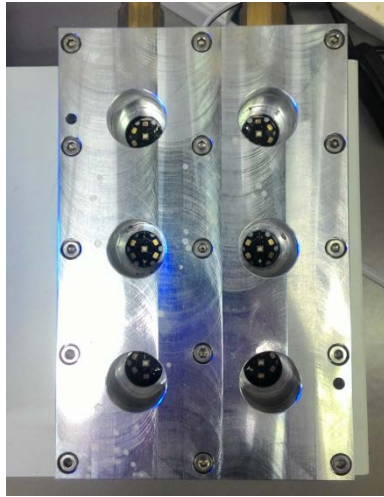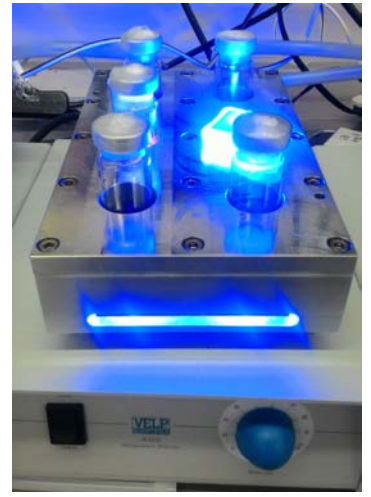

## 2 Synthesis of homobenzylic bromides

The homobenzylic bromide substrates **1b**,<sup>[1]</sup> **1c**,<sup>[2]</sup> **1d**,<sup>[3]</sup> **1e**,<sup>[4]</sup> **1f**,<sup>[5]</sup> **1i**,<sup>[6]</sup> **1j**,<sup>[7]</sup> **1l**,<sup>[8]</sup> **1m**,<sup>[9]</sup> **1n**<sup>[10]</sup> and **1o**<sup>[11]</sup> were synthesized according to the cited literature reports.

### General procedure for the bromination of alcohols (GP1)

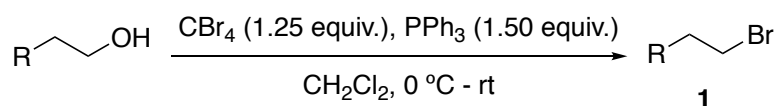

Following a procedure reported by Wills *et al.*,<sup>[12]</sup> in a round-bottom flask equipped with a teflon-coated stirring bar, the homobenzylic alcohol (1 equiv.) was dissolved in DCM (0.6 M) or DCM/MeCN (3/2, 0.6 M) or DCM/Et<sub>2</sub>O (1/1, 0.6 M) and CBr<sub>4</sub> (1.25 equiv.) was added to the solution at 0 °C. Then PPh<sub>3</sub> (1.5 equiv.) was added to the solution over 10 minutes. After stirring for 30 min at 0 °C, the solution was warmed up to room temperature and continued stirring until disappearance of starting material (monitored by TLC). The reaction mixture was concentrated under reduced pressure and then the residue was stirred in diethyl ether for 10 min. The resulting precipitate was removed by filtration and the filtrate was concentrated under reduced pressure. The crude mixture was purified by flash column chromatography through silica (eluent = petroleum ether/ethyl acetate) to afford homobenzylic bromide (**1**).

### General procedure for the bromination of alcohols (GP2)

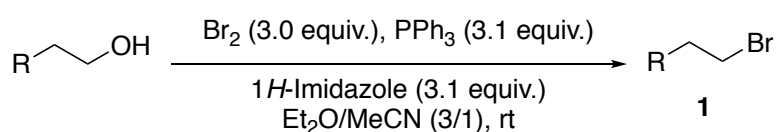

In a round-bottom flask equipped with a teflon-coated stirring bar, the homobenzylic alcohol (1.0 equiv.) was dissolved in dry Et<sub>2</sub>O/MeCN (3/1, 0.1 M) under nitrogen atmosphere and then PPh<sub>3</sub> (3.1 equiv.) followed by 1*H*-imidazole (3.1 equiv.) was added to the solution. Then bromine (3.0 equiv.) was added to the reaction mixture dropwise over 10 minutes and then the resulting mixture was allowed to stir at rt until the disappearance of the starting material. The reaction mixture was filtered and rinsed with Et<sub>2</sub>O. The organic layers were washed once with brine, dried over magnesium sulfate and the solvents were removed under reduced pressure. The crude mixture was purified by

flash column chromatography through silica (eluent = petroleum ether/ethyl acetate) to afford homobenzylic bromide (**1**).

#### 4- (2- bromoethyl)phenol (**1g**)

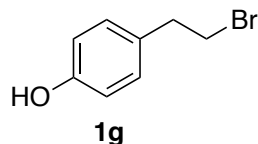

Following **GP1**, from 4-(2-hydroxyethyl)phenol (553 mg, 4.00 mmol), the homobenzylic bromide (**1g**) was obtained as white solid (588 mg, 2.92 mmol, 73% yield). [note: DCM/Et<sub>2</sub>O (1/1, 0.6 M) was used as solvent for the reaction.]

<sup>1</sup>H NMR (300 MHz, CDCl<sub>3</sub>) δ (ppm) = 7.13 – 7.04 (m, 2H), 6.84 – 6.73 (m, 2H), 4.75 (br, 1H), 3.52 (dd, *J* = 8.0, 7.3 Hz, 2H), 3.09 (t, *J* = 7.6 Hz, 2H).

<sup>13</sup>C NMR (75 MHz, CDCl<sub>3</sub>) δ (ppm) = 154.5, 131.4, 130.0, 115.6, 38.7, 33.6.

The experimental data are in agreement with the literature report.<sup>[13]</sup>

#### N- [4- (2- bromoethyl)phenyl]acetamide (**1h**)

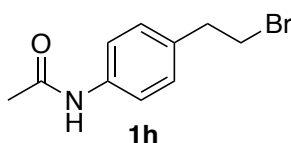

Following **GP1**, from *N*- [4- (2- hydroxyethyl)phenyl]acetamide (448 mg, 2.50 mmol), the homobenzylic bromide (**1h**) was obtained as white solid (551 mg, 2.28 mmol, 91% yield). [note: DCM/MeCN (3/2, 0.6 M) was used as solvent for the reaction]. The product was purified by two times flash column chromatography (silica, CH<sub>2</sub>Cl<sub>2</sub>:MeOH = 100:0 to 95:5; silica, petroleum ether:ethyl acetate = 50:50).

<sup>1</sup>H NMR (400 MHz, CDCl<sub>3</sub>) δ (ppm) = 7.45 (d, *J* = 8.5 Hz, 2H), 7.24 (br, 1H), 7.16 (d, *J* = 8.4 Hz, 2H), 3.53 (t, *J* = 7.6 Hz, 2H), 3.12 (t, *J* = 7.6 Hz, 2H), 2.17 (s, 3H).

<sup>13</sup>C NMR (101 MHz, CDCl<sub>3</sub>) δ (ppm) = 168.4, 136.8, 135.0, 129.4, 120.3, 38.9, 33.1, 24.7.

**IR (ATR):**  $\nu$  = 3295, 2922, 2855, 1662, 1599, 1510, 1409, 1368, 1316, 1211, 1129, 1010, 962, 828, 719 cm<sup>-1</sup>.

**HRMS (ESI):** *m/z* calc. for (C<sub>10</sub>H<sub>13</sub>BrNO<sup>+</sup>) [M+H]<sup>+</sup>: 242.0181; found: 242.0180.



### Methyl 4- (2- bromoethyl)benzoate (**1k**)

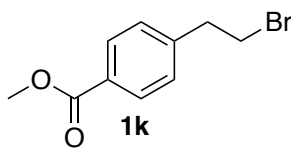

Following **GP2**, from methyl 4-(2-hydroxyethyl)benzoate (505 mg, 2.80 mmol), the homobenzyl bromide (**1k**) was obtained as light-orange colored oil (653 mg, 2.69 mmol, 96% yield).

$^1\text{H NMR}$  (300 MHz,  $\text{CDCl}_3$ )  $\delta$  (ppm) = 8.08 – 7.90 (m, 2H), 7.31 – 7.24 (m, 2H), 3.90 (s, 3H), 3.57 (t,  $J = 7.4$  Hz, 2H), 3.21 (t,  $J = 7.4$  Hz, 2H).

$^{13}\text{C NMR}$  (75 MHz,  $\text{CDCl}_3$ )  $\delta$  (ppm) = 167.0, 144.1, 130.0, 128.9, 128.8, 52.2, 39.2, 32.3.

The experimental data are in agreement with the literature report.<sup>[14]</sup>

### 1- [2- Bromo(1,1)- $d_2$ -ethyl]- 4- methoxybenzene (**1e-d<sub>2</sub>**)

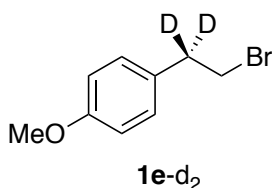

Following **GPI**, from 2-(4-methoxyphenyl)ethan-2,2- $d_2$ -1-ol (synthesized according to the literature report by Kang et al.)<sup>[15]</sup> (489 mg, 3.17 mmol), the homobenzyl bromide (**1e-d<sub>2</sub>**) was obtained as light-orange oil (627 mg, 2.89 mmol, 91% yield).

$^1\text{H NMR}$  (300 MHz,  $\text{CDCl}_3$ )  $\delta$  (ppm) = 7.17 – 7.09 (m, 2H), 6.90 – 6.82 (m, 2H), 3.80 (s, 3H), 3.51 (s, 2H).

$^{13}\text{C NMR}$  (75 MHz,  $\text{CDCl}_3$ )  $\delta$  (ppm) = 158.7, 131.1, 129.8, 114.1, 55.4, 33.4.

**IR (ATR):**  $\nu = 2960, 2837, 1610, 1513, 1461, 1297, 1245, 1177, 1111, 1033, 954, 805, 745$   $\text{cm}^{-1}$ .

**HRMS (ESI):**  $m/z$  calc. for  $(\text{C}_9\text{H}_9\text{D}_2^{79}\text{OBr}^+)$   $[\text{M}]^+$ : 216.0113; found: 216.0112; calc. for  $(\text{C}_9\text{H}_9\text{D}_2\text{O}^{81}\text{Br}^+)$   $[\text{M}]^+$ : 218.0193; found: 218.0095.

### 3 Synthesis of secondary alkyl bromides

The secondary alkyl bromide substrates **3c**,<sup>[16]</sup> **3d**,<sup>[17]</sup> **3e**,<sup>[18]</sup> **3g**,<sup>[19]</sup> and **1j**<sup>[18]</sup> were synthesized according to the cited literature reports.

#### Synthesis of 6-Bromo-2,2-dimethylheptanenitrile (**3f**)

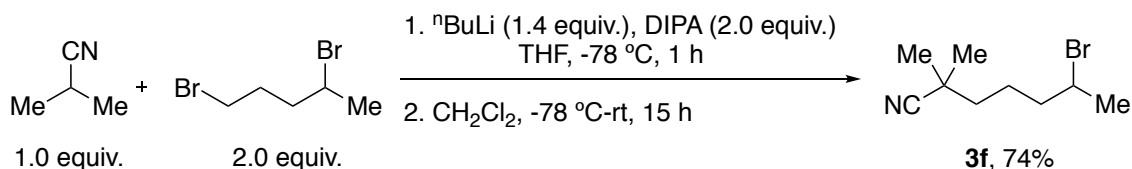

Diisopropylamine (2.02 g, 20 mmol) was dissolved in dry THF (35 mL) and cooled down to 0 °C. n-BuLi (5.6 mL, 2.5M, 14 mmol) was added dropwise and the solution was cooled down to -78°C. Isobutyronitrile (0.691g, 10.0 mmol) was added dropwise and stirred for 1 hour. This solution was then transferred dropwise to a solution of 1,4-dibromopentane (4.60g, 20 mmol) in THF (5 mL) at -78 °C and stirred at -78 °C for 2 h. Then, the reaction mixture was warmed up to rt and stirred overnight. The reaction was quenched with water and extracted with DCM. The combined organic layers were dried over MgSO<sub>4</sub> and concentrated under reduced pressure. The crude mixture was purified by flash column chromatography through silica gel (eluent: hexane/ethyl acetate = 9/1) to afford the pure product **3f** (1.62 g, 7.43 mmol, 74%) as a pale-yellow oil.

**<sup>1</sup>H NMR (300 MHz, CDCl<sub>3</sub>):** δ (ppm) = 4.18 – 4.07 (m, 1H), 1.88 – 1.49 (m, 6H), 1.72 (d, *J* = 6.7 Hz, 3H), 1.35 (s, 6H).

**<sup>13</sup>C NMR (75 MHz, CDCl<sub>3</sub>):** δ (ppm) = 125.1, 50.9, 40.9, 40.4, 32.4, 26.8, 26.7, 26.6, 23.7.

**IR (ATR):** ν = 2976, 2946, 2871, 2234, 1471, 1458, 1379, 1242, 1204, 1166 cm<sup>-1</sup>.

**HRMS (ESI):** *m/z* calc. for (C<sub>9</sub>H<sub>17</sub>BrN<sup>+</sup>) [M+H]<sup>+</sup>: 218.0539; found: 218.0539.

### Synthesis of 2-(3-bromobutyl)-6-methoxynaphthalene (**3h**)

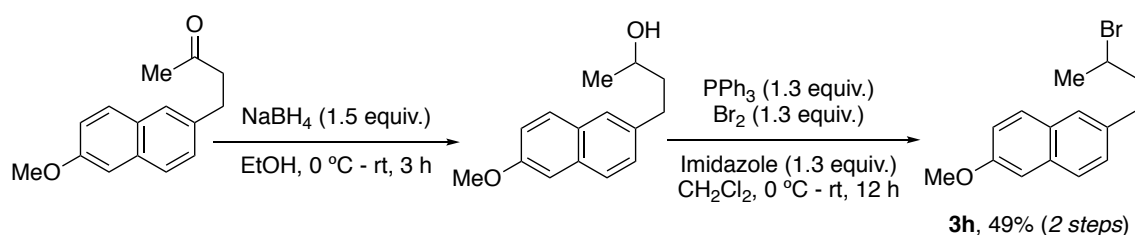

In an oven-dried Schlenk flash containing a magnetic stir bar under inert atmosphere, sodium borohydride (568 mg, 15.0 mmol, 1.5 equiv.) was added dropwise to the solution of Nabumetone (2.28 g, 10.0 mmol, 1.0 equiv.) in EtOH (28 mL) at 0 °C. Once the addition is completed, the reaction mixture was allowed to warm up to rt and stirred for 3 h. The solvent was removed under the reduced pressure. The residue was dissolved in dichloromethane, washed with water, dried over MgSO<sub>4</sub> and concentrated under reduced pressure to get the pure alcohol (2.12 g, 9.18 mmol, 92%). The obtained alcohol was directly used in next step. In an oven-dried Schlenk flash containing a magnetic stir bar, triphenylphosphine (3.13 g, 11.94 mmol, 1.3 equiv.) was dissolved in dichloromethane (0.33M based on alcohol). After cooling the solution to 0 °C, bromine (1.91 g, 11.94 mmol, 1.3 equiv.) was added dropwise and allowed to stir for 10 min to obtain a suspension. Then imidazole (813 mg, 11.94 mmol, 1.3 equiv.) followed by the alcohol substrate (2.12 g, 9.18 mmol, 1.0 equiv.) dissolved in dichloromethane (0.5M) was added to the suspension. The reaction mixture was allowed to warm up to rt and stirred overnight. The resulting reaction mixture was quenched with aq. 1M NaHCO<sub>3</sub> and extracted with dichloromethane (3 times). The combined organic phase was washed with brine solution, dried over MgSO<sub>4</sub> and concentrated under reduced pressure. The crude mixture was purified by flash column chromatography through silica gel (eluent: hexane/ethyl acetate = 100/0-99/1) to afford the pure product **3h** (1.42 g, 4.86 mmol, 49%, two steps) as white solid.

**<sup>1</sup>H NMR (300 MHz, CDCl<sub>3</sub>):** δ (ppm) = 7.68 (d, *J* = 8.3 Hz, 2H), 7.58 (s, 1H), 7.31 (dd, *J* = 8.4, 1.6 Hz, 1H), 7.16 – 7.12 (m, 1H), 7.12 (s, 1H), 4.16 – 4.05 (m, 1H), 3.92 (s, 3H), 3.05 – 2.83 (m, 2H), 2.28 – 2.06 (m, 2H), 1.75 (d, *J* = 6.7 Hz, 3H).

**<sup>13</sup>C NMR (75 MHz, CDCl<sub>3</sub>):** δ (ppm) = 157.4, 136.2, 133.2, 129.2, 129.1, 127.8, 127.1, 126.7, 119.0, 105.8, 55.4, 51.1, 42.8, 34.0, 26.7.

**IR (ATR):** ν = 2961, 2937, 2921, 1633, 1604, 1504, 1481, 1461, 1448, 1391, 1375, 1265, 1238, 1224, 1174, 1154, 1119, 1027, 848, 813, 614 cm<sup>-1</sup>.

**HRMS (ESI):** m/z calc. for (C<sub>15</sub>H<sub>18</sub>BrO<sup>+</sup>) [M+H]<sup>+</sup>: 293.0536; found: 293.0540.

**Melting Point:** 58-60 °C

**Synthesis of *N*-(4-((4-bromopentyl)oxy)phenyl)acetamide (**3i**)**

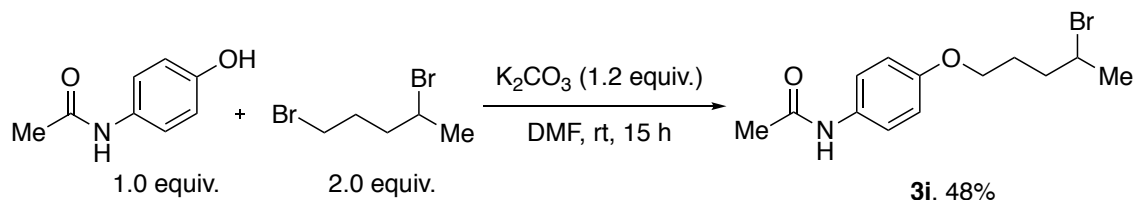

In a round-bottom flask containing a magnetic stir bar, paracetamol (756 mg, 5.0 mmol, 1.0 equiv.) and K<sub>2</sub>CO<sub>3</sub> (830 mg, 6.0 mmol, 1.2 equiv.) in DMF (8.0 mL) was stirred at rt for 1 h. Then 1,4-dibromopentane (1.36 mL, 10 mmol, 2.0 equiv.) was added to the reaction mixture and stirred for overnight. The reaction mixture was diluted with water and extracted with dichloromethane. The combined organic layers were washed 2% NaOH aq. solution (2×20 mL) followed by water (2×20 mL), dried over MgSO<sub>4</sub> and concentrated under reduced pressure. The crude mixture was purified by flash column chromatography through silica gel (eluent: hexane/ethyl acetate = 3/1) to afford the pure product **3i** (714 mg, 2.38 mmol, 48%) as white solid.

**<sup>1</sup>H NMR (400 MHz, CDCl<sub>3</sub>):** δ (ppm) = 7.37 (d, *J* = 9.0 Hz, 2H), 7.27 (bs, 1H), 6.83 (d, *J* = 9.0 Hz, 2H), 4.23 – 4.15 (m, 1H), 4.00 – 3.91 (m, 2H), 7.14 (s, 3H), 2.04 – 1.85 (m, 4H), 1.74 (d, *J* = 6.7 Hz, 3H).

**<sup>13</sup>C NMR (101 MHz, CDCl<sub>3</sub>):** δ (ppm) = 168.4, 155.9, 131.2, 122.1, 114.9, 67.5, 51.4, 37.8, 27.8, 26.7, 24.5.

**IR (ATR):** ν = 3296, 3258, 3198, 3140, 3095, 2954, 2901, 2855, 1660, 1604, 1548, 1506, 1474, 1411, 1233, 1214, 1173, 1031, 828, 754 cm<sup>-1</sup>.

**HRMS (ESI):** m/z calc. for (C<sub>13</sub>H<sub>19</sub>BrNO<sub>2</sub><sup>+</sup>) [M+H]<sup>+</sup>: 300.0594; found: 300.0586.

**Melting Point:** 88-90 °C

## 4 Synthesis of nitrogen-donor ligands

The ligand **L1** and **L7** were commercially available. The following ligands **L2**,<sup>[20]</sup> **L3**,<sup>[21][22]</sup> **L4**,<sup>[23]</sup> **L6**,<sup>[24]</sup> and **L9**<sup>[18]</sup> were synthesized according to the cited literature reports.

### Synthesis of 4,7- bis(4- fluorophenyl)- 2,9- dimethyl- 1,10- phenanthroline (**L5**)

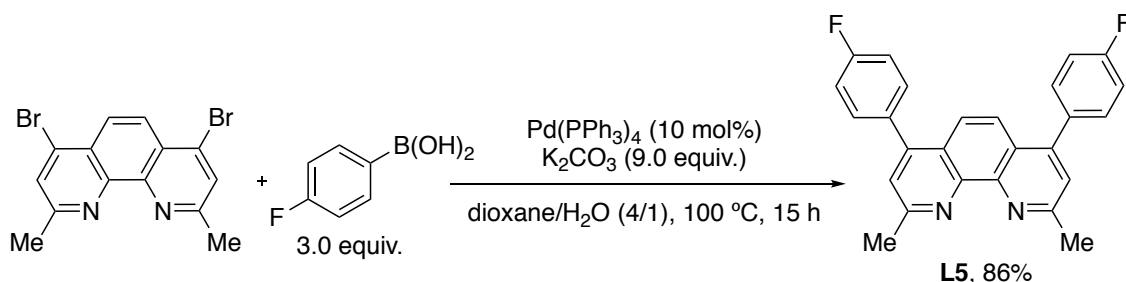

In a Schlenk tube equipped with a teflon-coated stirring bar, a suspension of 4,7-dibromo-2,9-dimethyl-1,10-phenanthroline (136 mg, 0.37 mmol, 1.0 equiv.), 4-fluorophenylboronic acid (156 mg, 1.1 mmol, 3.0 equiv.) and K<sub>2</sub>CO<sub>3</sub> (462 mg, 3.34 mmol, 9.0 equiv.) in 1,4-dioxane:H<sub>2</sub>O 4:1 (5 ml) was degassed by bubbling nitrogen for 5 min. Then Pd(PPh<sub>3</sub>)<sub>4</sub> (46 mg, 37 μmol, 10 mol%) was added and the reaction mixture was stirred at 100°C for overnight under nitrogen atmosphere. The reaction was cooled down to room temperature. The reaction was purified by flash column chromatography through silica (eluent: petroleum ether:ethyl acetate 50:50 to 0:100) affording pure compound **L5** as a light-yellow solid (126 mg, 0.32 mmol, 86% yield).

<sup>1</sup>H NMR (300 MHz, CDCl<sub>3</sub>) δ (ppm) = 7.72 (s, 2H), 7.49 (m, 4H), 7.43 (s, 2H), 7.26 – 7.16 (m, 4H), 3.00 (s, 6H).

<sup>13</sup>C NMR (101 MHz, CDCl<sub>3</sub>) δ (ppm) = 163.0 (d, <sup>1</sup>J(<sup>19</sup>F-<sup>13</sup>C) = 248.6 Hz), 159.0, 147.9, 145.6, 134.1 (d, <sup>4</sup>J(<sup>19</sup>F-<sup>13</sup>C) = 3.4 Hz), 131.5 (d, <sup>3</sup>J(<sup>19</sup>F-<sup>13</sup>C) = 8.1 Hz), 124.8, 124.3, 123.0, 115.8 (d, <sup>2</sup>J(<sup>19</sup>F-<sup>13</sup>C) = 21.5 Hz), 25.9.

<sup>19</sup>F NMR (282 MHz, CDCl<sub>3</sub>) δ (ppm) = -113.23.

HRMS (ESI): m/z calc. for (C<sub>26</sub>H<sub>19</sub>N<sub>2</sub>F<sub>2</sub>)<sup>+</sup> [M+H]<sup>+</sup>: 397.1511; found: 397.1514.

### Synthesis of 4,4'-di-tert-butyl-6,6'-dimethyl-2,2'-bipyridine (**L8**)

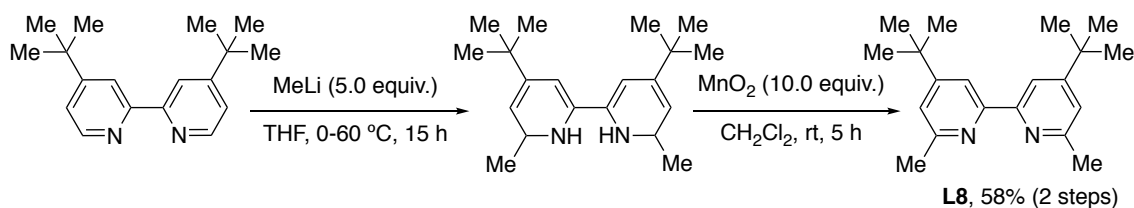

To a solution of 4,4'-di-*tert*-butyl-2,2'-bipyridine (4.0 g, 15 mmol, 1.0 equiv.) in THF, MeLi (1.6 M) in diethyl ether (47 mL, 75 mmol, 5.0 equiv.) was dropwise added at 0 °C. The resulting reaction mixture was heated at 60 °C for overnight. The reaction mixture was cooled at rt and quenched with aq. NH<sub>4</sub>Cl solution. The organic layers were extracted with DCM, washed with brine, dried with MgSO<sub>4</sub> and solvents were evaporated under reduced pressure. To the solution of compound in dichloromethane (0.3 M), activated MnO<sub>2</sub> (13.0 g, 150 mmol, 10.0 equiv.) was added and stirred at rt for 5 h. The reaction mixture was filtrated through celite and silica. The filtrate was concentrated and the crude was purified through silica gel (eluent: hexane/ethyl acetate = 4/1 – 1/1) to afford desired compound **L8** (2.58 g, 8.7 mmol, 58 %) as white solid.

**<sup>1</sup>H NMR (400 MHz, CDCl<sub>3</sub>):** δ (ppm) = 8.13 (d, *J* = 1.5 Hz, 2H), 7.14 (d, *J* = 1.6 Hz, 2H), 2.63 (s, 6H), 1.37 (s, 18H).

**<sup>13</sup>C NMR (101 MHz, CDCl<sub>3</sub>):** δ (ppm) = 161.0, 157.8, 156.6, 120.2, 115.7, 35.0, 30.8, 25.0.

**IR (ATR):** ν = 2959, 2905, 2870, 1591, 1557, 1477, 1390, 1360, 1290, 1222, 917, 862, 719, 619 cm<sup>-1</sup>.

**HRMS (ESI):** *m/z* calc. for (C<sub>20</sub>H<sub>29</sub>N<sub>2</sub>)<sup>+</sup> [M+H]<sup>+</sup>: 297.2325; found: 297.2325.

**Melting Point:** 190-192 °C

## 5 Synthesis of (L)NiBr<sub>2</sub> complex

The following metal complexes (L1)NiBr<sub>2</sub>,<sup>[25]</sup> (L4)NiBr<sub>2</sub><sup>[26]</sup> and (L7)NiBr<sub>2</sub><sup>[27]</sup> were synthesized according to the cited literature reports.

### General procedure for the synthesis of LNiBr<sub>2</sub> complex (GP3)

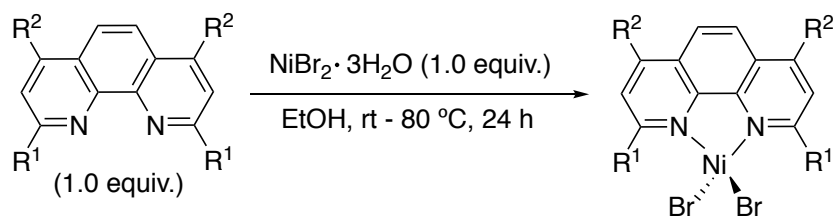

Following a modified procedure reported by Budnikova *et al.*,<sup>[28]</sup> in a round-bottom flask equipped with a teflon-coated stirring bar, NiBr<sub>2</sub> · 3H<sub>2</sub>O (1.0 equiv) was dissolved in absolute ethanol (0.17 M) under nitrogen atmosphere and then a solution of the ligand (1.0 equiv.) in absolute ethanol (0.17 M) was added dropwise over 10 minutes. The reaction mixture was stirred at rt – 80 °C for 24 hours. The precipitate was filtered off, washed with absolute ethanol, diethyl ether and dried under high vacuum.

### (2,4,7,9-tetramethyl-1,10-phenanthroline)nickel (II) dibromide [(L2)NiBr<sub>2</sub>]

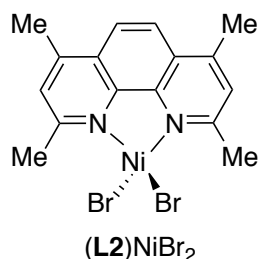

Following GP3, pink-violet solid (49.5 mg, 20% yield) with L2 was obtained.

**HRMS (Q-TOF, ESI):** m/z calc. for (C<sub>16</sub>H<sub>17</sub>N<sub>2</sub>Ni<sup>+</sup>) [M-2Br+H]<sup>+</sup>: 295.0740; found: 295.0739. **Elemental Analysis:** Anal. calc. for C<sub>16</sub>H<sub>16</sub>Br<sub>2</sub>N<sub>2</sub>Ni: C, 42.25; H, 3.55; N, 6.16. Found: C, 41.86; H, 3.55; N, 5.89.

**(4,7-dimethoxy-2,9-dimethyl-1,10-phenanthroline)nickel (II) dibromide [(L3)NiBr<sub>2</sub>]**

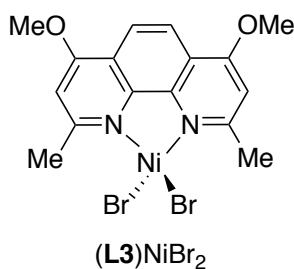

Following **GP3**, pink-violet solid (203 mg, 75% yield) with **L3** was obtained.

**HRMS (Q-TOF, ESI):** m/z calc. for (C<sub>16</sub>H<sub>16</sub><sup>35</sup>ClN<sub>2</sub>NiO<sub>2</sub><sup>+</sup>) [M-2Br+<sup>37</sup>Cl]<sup>+</sup>: 361.0248; found: 361.0249; m/z calc. for (C<sub>16</sub>H<sub>16</sub><sup>37</sup>ClN<sub>2</sub>NiO<sub>2</sub><sup>+</sup>) [M-2Br+<sup>37</sup>Cl]<sup>+</sup>: 363.0213; found: 363.0213. **Elemental Analysis:** Anal. calc. for C<sub>16</sub>H<sub>16</sub>Br<sub>2</sub>N<sub>2</sub>NiO<sub>2</sub>: C, 39.48; H, 3.31; N, 5.75. found: C, 39.61; H, 3.24; N, 5.59.

**(4,7-bis(4-fluorophenyl)-2,9-dimethyl-1,10-phenanthroline)nickel (II) dibromide [(L5)NiBr<sub>2</sub>]**

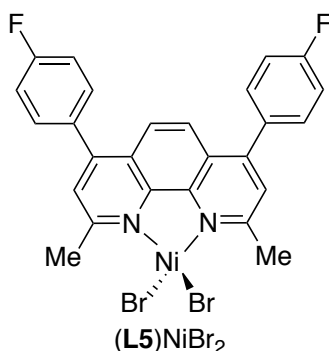

Following **GP3**, blush pink solid (128 mg, 66% yield) with **L5** was obtained.

**HRMS (Q-TOF, ESI):** m/z calc. for (C<sub>27</sub>H<sub>19</sub>F<sub>2</sub>N<sub>2</sub>O<sub>2</sub>Ni<sup>+</sup>) [M-2Br+HCO<sub>2</sub>]<sup>+</sup>: 499.0763; found: 499.0765. **Elemental Analysis:** Anal. calc. for C<sub>26</sub>H<sub>18</sub>F<sub>2</sub>Br<sub>2</sub>N<sub>2</sub>Ni: C, 50.78; H, 2.95; N, 4.56. Found: C, 50.72; H, 2.97; N, 4.48.



**(2,9-diethyl-1,10-phenanthroline)nickel (II) dibromide [(L6)NiBr<sub>2</sub>]**

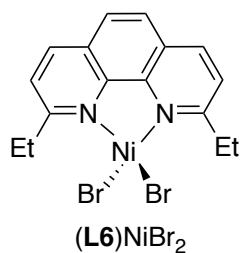

Following **GP3**, violet solid (430 mg, 68% yield) with **L6** was obtained.

**HRMS (Q-TOF, ESI):**  $m/z$  calc. for  $(C_{17}H_{17}N_2NiO_2)^+$   $[M-2Br+HCO_2]^+$ : 339.0638; found: 339.0639. **Elemental Analysis:** Anal. calc. for  $C_{16}H_{16}Br_2N_2Ni$ : C, 42.25; H, 3.55; N, 6.16. Found: C, 42.26; H, 3.61; N, 6.14.

## 6 Synthesis of additional reagents

3,5- diethyl 2,6- dimethyl- 1,4- dihydropyridine- 3,5- dicarboxylate (Hantzsch ester, HEH) was synthesized according to the procedure reported by Christmann *et al.*<sup>[29]</sup>

2,4,5,6-Tetra(9*H*-carbazol-9-yl)isophthalonitrile (4CzIPN) was synthesized according to the procedure reported by Zhang *et al.*<sup>[30]</sup>

## 7 Optimizations of reaction conditions

### 7.1 General procedure for the photocarboxylation of **1a** with CO<sub>2</sub>

In an oven-dried flat-bottom vial equipped with a teflon-coated stirring bar, Hantzsch ester (1.0-2.0 equiv), 4-CzIPN (0.01 equiv), Ni-catalyst (0.05 equiv), base (1.0 equiv) and 4Å MS (50 mg) or additives were added and the vial was sealed with a PTFE septum. The vial was evacuated and back-filled under CO<sub>2</sub> flow at least three times. The solvent (2 ml) was added under CO<sub>2</sub> flow and then the system was degassed by applying vacuum for 3 min. Then the solution was saturated with CO<sub>2</sub> by bubbling the gas through the solvent for 3 min. Substrate **1a** (27.5 μl, 0.2 mmol, 1.0 equiv.) was added, then a CO<sub>2</sub> balloon was connected to the reaction vessel using a hypodermic needle and the reaction was irradiated under blue light ( $\lambda = 455$  nm) for the indicated time. The reaction was quenched by the addition of HCl 2M (1 ml), then diluted with AcOEt (4 ml) and water (3 ml). The layers were separated, and the aqueous layer was extracted twice with AcOEt (4 ml each time). The combined organic layers were washed once again with water (2 ml), then with brine (2 ml) and the solvent removed under reduced pressure. The internal standard 1,3,5-trimethoxybenzene (approx. 15 mg) was added to the crude mixture and yield was determined by <sup>1</sup>H NMR analysis.

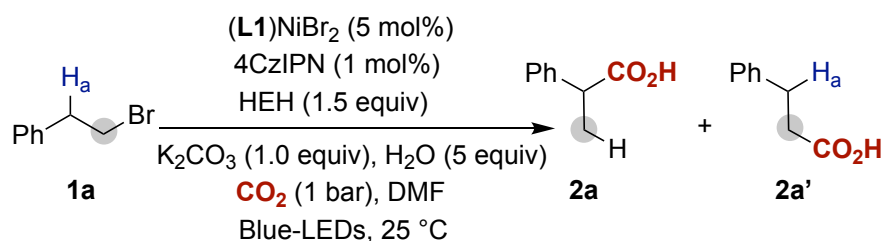

| entry             | deviation from standard conditions                                        | yield (%) <sup>[a],[b]</sup> | 2a:2a'       |
|-------------------|---------------------------------------------------------------------------|------------------------------|--------------|
| <b>1</b>          | <b>none</b>                                                               | <b>66 (56)</b>               | <b>90:10</b> |
| 2                 | (L2)NiBr <sub>2</sub> instead of (L1)NiBr <sub>2</sub>                    | 36                           | 70:30        |
| 3                 | (L3)NiBr <sub>2</sub> instead of (L1)NiBr <sub>2</sub>                    | 28                           | 71:29        |
| 4                 | (L4)NiBr <sub>2</sub> instead of (L1)NiBr <sub>2</sub>                    | 30                           | 62:38        |
| 5                 | (L5)NiBr <sub>2</sub> instead of (L1)NiBr <sub>2</sub>                    | 42                           | 72:28        |
| 6                 | (L6)NiBr <sub>2</sub> instead of (L1)NiBr <sub>2</sub>                    | 55                           | 85:15        |
| 7                 | NiBr <sub>2</sub> ·glyme/L1 instead of (L1)NiBr <sub>2</sub>              | 58                           | 90:10        |
| 8                 | using HEH (1.0 equiv)                                                     | 59                           | 90:10        |
| 9                 | using HEH (2.0 equiv)                                                     | 64                           | 87:13        |
| 10 <sup>[c]</sup> | using H <sub>2</sub> O (10.0 equiv)                                       | 61                           | 90:10        |
| 11                | using 4Å MS instead of H <sub>2</sub> O                                   | 50                           | 85:15        |
| 12                | using LiBr (1.0 equiv)                                                    | 61                           | 84:16        |
| 13                | Cs <sub>2</sub> CO <sub>3</sub> instead of K <sub>2</sub> CO <sub>3</sub> | 35                           | 42:58        |
| 14                | no (L1)NiBr <sub>2</sub> , no 4CzIPN or no light                          | 0                            | —            |

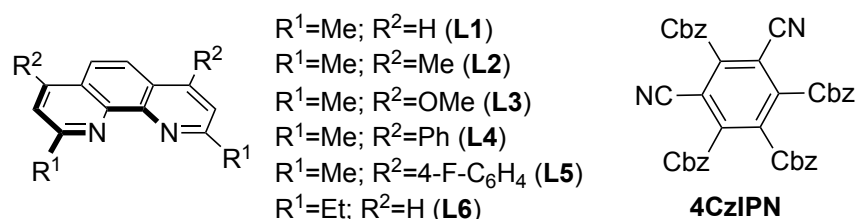

**Table S1:** Optimization of the reaction conditions: **1a** (0.20 mmol), (L1)NiBr<sub>2</sub> (5 mol%), 4-CzIPN (1 mol%), HEH (1.5 equiv), K<sub>2</sub>CO<sub>3</sub> (1.0 equiv), H<sub>2</sub>O (5.0 equiv), CO<sub>2</sub> (1 bar), Blue-LEDs in DMF (0.1 M) at 25 °C for 5 h. <sup>[a]</sup> Yields determined by NMR using 1,3,5-trimethoxybenzene as standard. <sup>[b]</sup> Isolated yield, average of two independent runs. <sup>[c]</sup> HEH (2.0 equiv) was used. DMF = dimethylformamide; Cz = carbazole; HEH = diethyl 1,4-dihydro-2,6-dimethyl-3,5-pyridinedicarboxylate.

## 7.2 General procedure for the photocarboxylation of **3a** with CO<sub>2</sub>

An oven-dried Schlenk tube containing a magnetic stir bar was charged with LNiBr<sub>2</sub> (0.05-0.10 equiv.) or NiBr<sub>2</sub>·glyme (0.10 equiv.) and ligand (L, 0.10 equiv.), 4CzIPN (0.005-0.01 equiv.), Hantzsch ester (HEH, 2.00 equiv.) and the alkyl bromide (0.25 mmol, 1.00 equiv.). The Schlenk tube was then taken inside a glovebox, where base (2.00 equiv.) was added. The tube was then taken out of the glovebox and connected to a vacuum line where it was evacuated and back-filled under CO<sub>2</sub> flow at least three times. Solvent (0.08M) was added under CO<sub>2</sub> flow. Once all the components were added, the Schlenk tube was closed at the atmospheric pressure of CO<sub>2</sub> (1 bar) and placed at a

temperature-controlled photo-reactor maintained at 10 °C and stirred for 20 h in the presence of continuous light irradiation from blue LEDs ( $\lambda = 451$  nm). The reaction mixture was quenched with 2M HCl aq. solution to release free acid by hydrolysis of carboxylate salt and diluted with ethyl acetate. The combined organic layers were extracted with ethyl acetate (at least three times), washed with water followed by brine solution. Anisole (27  $\mu$ L) as internal standard was added to the solution and filtered through short pad of silica gel. The yield was determined by GC-FID analysis.

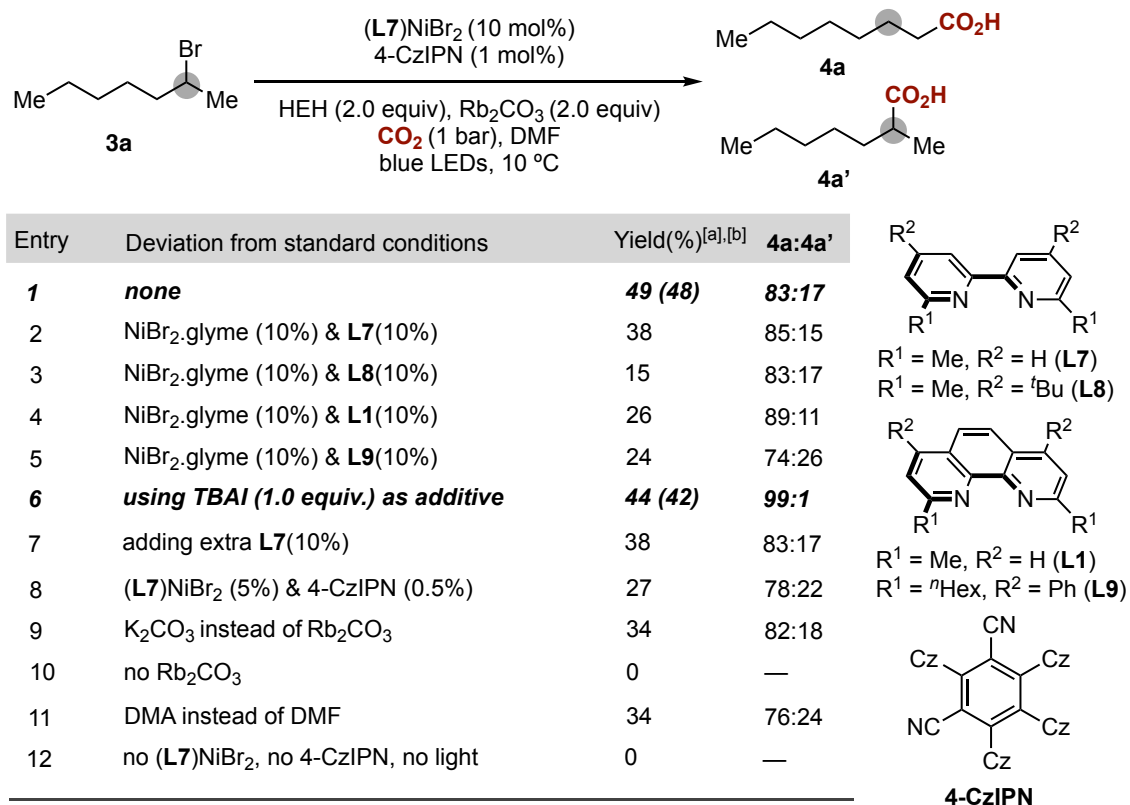

**Table S2.** Optimization of the reaction conditions. **3a** (0.25 mmol), (L7)NiBr<sub>2</sub> (10 mol%), 4-CzIPN (1 mol%), HEH (2.0 equiv), Rb<sub>2</sub>CO<sub>3</sub> (2.0 equiv), CO<sub>2</sub> (1 bar), Blue-LEDs in DMF (0.08 M) at 10 °C for 20 h. <sup>[a]</sup> Yields determined by GC using anisole as standard. <sup>[b]</sup> Isolated yield, average of two independent runs.

## 8 Photocarboxylation of alkyl bromides with CO<sub>2</sub>

### 8.1 Photocarboxylation reactions en route to aryl acetic acids

#### 8.1.1 General procedure (GP4)

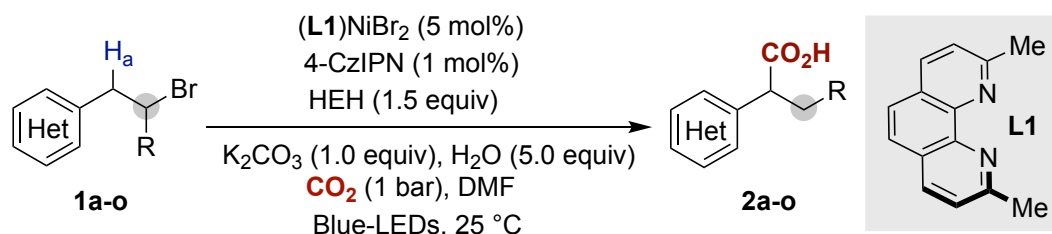

In an oven-dried flat-bottom vial equipped with a teflon-coated stirring bar, 4-CzIPN (0.01 equiv), (L1)NiBr<sub>2</sub> (0.05 equiv), K<sub>2</sub>CO<sub>3</sub> (1.0 equiv) and Hantzsch ester (HEH, 1.5 equiv) were weighted and the vial was sealed with a PTFE septum. The vial was evacuated and back-filled under CO<sub>2</sub> flow at least three times. The solvent DMF (2 ml) was added under CO<sub>2</sub> flow and then the system was degassed by applying vacuum for 3 min. Then the solution was saturated with CO<sub>2</sub> by bubbling the gas through it for 3 min. Substrate **1a-o** (0.2 mmol, 1.0 equiv.) was added, then a CO<sub>2</sub> balloon was connected to the reaction vessel using a hypodermic needle and the reaction was irradiated under blue light ( $\lambda = 455$  nm) for the indicated time. The reaction was quenched by the addition of HCl 2M (1 ml) and then diluted with ethyl acetate (4 ml) and water (3 ml). The layers were separated and the aqueous layer was extracted twice with ethyl acetate (4 ml each time). The combined organic layers were washed once again with water (2 ml) followed by brine (2 ml) and the solvent removed under reduced pressure. The residue was dissolved in diethyl ether (5 ml), which was extracted three times with aq. 1M NaOH (5 ml each time) and the combined water layers were washed twice with diethyl ether (5 ml each time), which was discarded. The water layer was acidified to pH = 2 with concentrated HCl, then extracted three times with ethyl acetate (10 ml each time). The combined organic layers were dried over sodium sulfate and the solvent was removed under reduced pressure affording a mixture of the branched and linear carboxylic acid (**2a-o**).

## 8.1.2 Characterization data

### 2-Phenylpropanoic acid (**2a**)/ 3-phenylpropanoic acid (**2a'**)

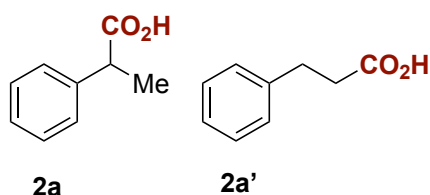

Following **GP4**, an inseparable mixture (90:10) of **2a/2a'** from **1a** (0.2 mmol) was obtained as a colorless oil (17.0 mg, 0.11 mmol, 56% yield).

Following **GP5**, an inseparable mixture (23:77) of **2a/2a'** from **1a** (0.25 mmol) was obtained as a colorless oil (22.0 mg, 0.15 mmol, 59% yield).

**Branched acid 2a:**  $^1\text{H NMR}$  (300 MHz,  $\text{CDCl}_3$ )  $\delta$  (ppm) = 7.40-7.18 (s, 5H), 3.75 (q,  $J$  = 7.2 Hz, 1H), 1.52 (d,  $J$  = 7.2 Hz, 3H).  $^{13}\text{C NMR}$  (75 MHz,  $\text{CDCl}_3$ )  $\delta$  (ppm) = 180.9, 139.9, 128.8, 127.7, 127.5, 45.5, 18.2.

**Linear acid 2a':**  $^1\text{H NMR}$  (300 MHz,  $\text{CDCl}_3$ )  $\delta$  (ppm) = 7.40-7.18 (s, 5H), 2.95 (t,  $J$  = 7.8 Hz, 2H), 2.68 (t,  $J$  = 7.8 Hz, 2H).  $^{13}\text{C NMR}$  (75 MHz,  $\text{CDCl}_3$ )  $\delta$  (ppm) = 179.3, 140.3, 128.7, 128.4, 126.5, 35.7, 30.7.

**MS (ESI):**  $m/z$  calc. for  $(\text{C}_9\text{H}_{11}\text{O}_2)^+$   $[\text{M}+\text{H}]^+$ : 151.08; found: 151.08.

Spectroscopic data for **2a/2a'** match those previously reported in literature.<sup>[31]</sup>

### 2-(2-Methylphenyl)propanoic acid (**2b**) / 3-(2-methylphenyl)propanoic acid (**2b'**)

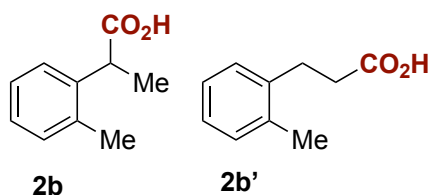

Following **GP4**, an inseparable mixture (90:10) of **2b/2b'** from **1b** (0.2 mmol) was obtained as a light-yellow solid (17.0 mg, 0.10 mmol, 51% yield).

**Branched acid 2b:**  $^1\text{H NMR}$  (400 MHz,  $\text{CDCl}_3$ )  $\delta$  (ppm) = 7.42 – 7.18 (m, 5H), 4.07 (q,  $J$  = 7.1 Hz, 1H), 2.47 (s, 3H), 1.58 (d,  $J$  = 7.1 Hz, 3H).  $^{13}\text{C NMR}$  (101 MHz,  $\text{CDCl}_3$ )  $\delta$  (ppm) = 180.5, 138.5, 136.0, 130.7, 127.3, 126.7, 126.6, 41.2, 19.8, 17.7.

**Linear acid 2b':**  $^1\text{H NMR}$  (400 MHz,  $\text{CDCl}_3$ )  $\delta$  (ppm) = 7.41 – 7.19 (m, 5H) [*overlapped with the major isomer*], 3.03 (dd,  $J$  = 8.9, 6.9 Hz, 2H), 2.72 (dd,  $J$  = 8.9, 7.1 Hz, 2H), 2.40

(s, 3H).  $^{13}\text{C}$  NMR (101 MHz,  $\text{CDCl}_3$ )  $\delta$  178.8, 138.4, 136.1, 130.5, 128.6, 126.7, 126.3, 34.4, 28.1, 19.4.

**HRMS (ESI):**  $m/z$  calc. for  $(\text{C}_{10}\text{H}_{11}\text{O}_2)^- [\text{M}-\text{H}]^-$  163.0765; found: 163.0767.

Spectroscopic data for **2b/2b'** match those previously reported in literature.<sup>[32],[33]</sup>

### 2-(3-Methoxyphenyl)propanoic acid (**2c'**) / 3-(3-methoxyphenyl)propanoic acid (**2c'**)

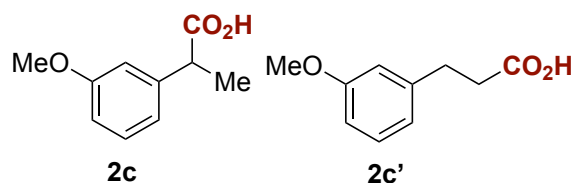

Following **GP4**, an inseparable mixture (85:15) of **2c/2c'** from **1c** (0.2 mmol) was obtained as a light-yellow gum (19.2 mg, 0.11 mmol, 52% yield).

**Branched acid 2c:**  $^1\text{H}$  NMR (300 MHz,  $\text{CDCl}_3$ )  $\delta$  (ppm) = 7.25 (t,  $J$  = 8.1 Hz, 1H), 6.94 – 6.89 (m, 1H), 6.88 (t,  $J$  = 2.1 Hz, 1H), 6.82 (ddd,  $J$  = 8.2, 2.6, 1.0 Hz, 1H), 3.81 (s, 3H), 3.72 (q,  $J$  = 7.2 Hz, 1H), 1.51 (d,  $J$  = 7.2 Hz, 3H).  $^{13}\text{C}$  NMR (75 MHz,  $\text{CDCl}_3$ )  $\delta$  (ppm) = 180.5, 159.9, 141.4, 129.8, 120.1, 113.6, 112.8, 55.4, 45.5, 18.2.

**Linear acid 2c':**  $^1\text{H}$  NMR (300 MHz,  $\text{CDCl}_3$ )  $\delta$  (ppm) = 7.24 – 7.17 (m, 1H) [*overlapped with the major isomer*], 6.79 – 6.73 (m, 3H), 3.79 (s, 3H), 2.93 (t,  $J$  = 7.8 Hz, 2H), 2.72 – 2.61 (m, 2H).  $^{13}\text{C}$  NMR (75 MHz,  $\text{CDCl}_3$ )  $\delta$  (ppm) = 179.0, 159.8, 141.9, 129.7, 120.7, 114.2, 111.8, 55.3, 35.6, 30.7.

**HRMS (ESI):**  $m/z$  calc. for  $(\text{C}_{13}\text{H}_{11}\text{O}_3)^- [\text{M}-\text{H}]^-$ : 179.0714; found: 179.0718.

Spectroscopic data for **2c/2c'** match those previously reported in literature.<sup>[31]</sup>

### 2-(4-Methylphenyl)propanoic acid (**2d**) / 3-(4-methylphenyl)propanoic acid (**2d'**)

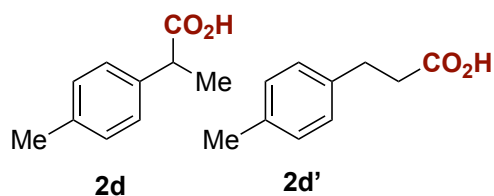

Following **GP4**, an inseparable mixture (93:7) of **2d/2d'** from **1d** (0.2 mmol) was obtained as an off-white solid (16.1 mg, 0.10 mmol, 48% yield).



**Branched acid 2d:**  $^1\text{H NMR}$  (300 MHz,  $\text{CDCl}_3$ )  $\delta$  (ppm) = 7.28 – 7.19 (m, 2H), 7.18 – 7.09 (m, 2H), 3.71 (q,  $J$  = 7.1 Hz, 1H), 2.34 (s, 3H), 1.50 (d,  $J$  = 7.2 Hz, 3H).  $^{13}\text{C NMR}$  (75 MHz,  $\text{CDCl}_3$ )  $\delta$  (ppm) = 180.7, 137.2, 137.0, 129.5, 127.6, 45.0, 21.2, 18.2.

**Linear acid 2d':**  $^1\text{H NMR}$  (300 MHz,  $\text{CDCl}_3$ )  $\delta$  (ppm) = 7.29 – 7.18 (m, 2H) [overlaps with the major isomer], 7.18 – 7.08 (m, 2H) [overlaps with the major isomer], 2.91 (t,  $J$  = 7.7 Hz, 2H), 2.65 (t,  $J$  = 7.8 Hz, 2H), 2.33 (s, 3H).  $^{13}\text{C NMR}$  (75 MHz,  $\text{CDCl}_3$ )  $\delta$  136.0, 129.3, 128.3, 35.8, 30.3, 21.1. [Note: Some signals are overlapped with the major isomer]  
**HRMS (ESI):**  $m/z$  calc. for ( $\text{C}_{10}\text{H}_{11}\text{O}_2$ )  $[\text{M}-\text{H}]^-$ : 163.0765; found: 163.0767.

Spectroscopic data for **2d/2d'** match those previously reported in literature.<sup>[31],[34]</sup>

### 2-(4-Methoxyphenyl)propanoic acid (**2e**) / 3-(4-methoxyphenyl)propanoic acid (**2e'**)

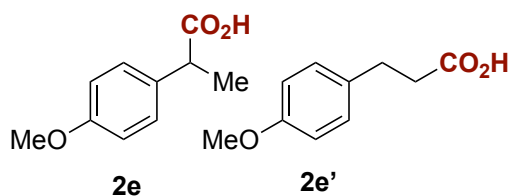

Following **GP4**, an inseparable mixture (90:10) of **2e/2e'** from **1e** (0.2 mmol) was obtained as a light yellow solid (20.6 mg, 0.11 mmol, 57% yield).

**Branched acid 2e:**  $^1\text{H NMR}$  (300 MHz,  $\text{CDCl}_3$ )  $\delta$  (ppm) = 7.29 – 7.21 (m, 2H), 6.91 – 6.85 (m, 2H), 3.80 (s, 3H), 3.69 (q,  $J$  = 7.2 Hz, 2H), 1.49 (d,  $J$  = 7.2 Hz, 3H).  $^{13}\text{C NMR}$  (75 MHz,  $\text{CDCl}_3$ )  $\delta$  (ppm) = 181.1, 159.0, 132.0, 128.7, 114.2, 55.4, 44.6, 18.3.

**Linear acid 2e':**  $^1\text{H NMR}$  (300 MHz,  $\text{CDCl}_3$ )  $\delta$  (ppm) = 7.16 – 7.08 (m, 2H), 6.85 – 6.80 (m, 2H), 3.79 (s, 3H), 2.89 (t,  $J$  = 7.7 Hz, 2H), 2.65 (t,  $J$  = 7.7 Hz, 2H).  $^{13}\text{C NMR}$  (75 MHz,  $\text{CDCl}_3$ )  $\delta$  (ppm) = 179.3, 158.21, 132.3, 129.4, 114.1, 36.0, 29.8. [Note: One signal is overlapped with the other isomer.]

**MS (ESI):**  $m/z$  calc. for ( $\text{C}_{10}\text{H}_{13}\text{O}_3$ )  $[\text{M}+\text{H}]^+$ : 181.09; found: 181.09.

Spectroscopic data for **2e/2e'** match those previously reported in literature.<sup>[31],[33]</sup>

**2-([1,1'-Biphenyl]-4-yl)propanoic acid (2f) / 3-([1,1'-biphenyl]-4-yl)propanoic acid (2f')**

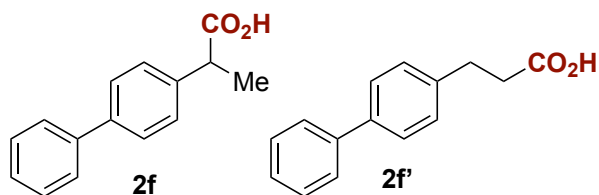

Following **GP4**, an inseparable mixture (90:10) of **2f/2f'** from **1f** (0.2 mmol) was obtained as a white solid (20.5 mg, 0.09 mmol, 45% yield).

**Branched acid 2f:**  $^1\text{H NMR}$  (400 MHz,  $\text{CDCl}_3$ )  $\delta$  (ppm) = 7.62 – 7.54 (m, 4H), 7.49 – 7.32 (m, 5H), 3.81 (q,  $J = 7.2$  Hz, 1H), 1.58 (d,  $J = 7.2$  Hz, 3H).  $^{13}\text{C NMR}$  (101 MHz,  $\text{CDCl}_3$ )  $\delta$  (ppm) = 180.8, 140.8, 140.5, 138.9, 128.9, 128.2, 127.6, 127.4, 127.2, 45.2, 18.3.

**Linear acid 2f':**  $^1\text{H NMR}$  (400 MHz,  $\text{CDCl}_3$ )  $\delta$  (ppm) = 7.62 – 7.52 (m, 4H), 7.48 – 7.28 (m, 5H), 3.01 (t,  $J = 7.9$  Hz, 2H), 2.73 (t,  $J = 7.9$  Hz, 2H).  $^{13}\text{C NMR}$  (101 MHz,  $\text{CDCl}_3$ )  $\delta$  (ppm) = 179.2, 141.0, 139.5, 139.3, 128.9, 128.8, 127.4, 127.3, 127.1, 35.6, 30.3.

**MS (ESI):**  $m/z$ : calc. for  $(\text{C}_{15}\text{H}_{15}\text{O}_2)^+$   $[\text{M}+\text{H}]^+$ : 227.10; found: 227.10 (100%), 228.11 (16.2%), 229.11 (1.7%).

Spectroscopic data for **2f/2f'** match those previously reported in literature.<sup>[31],[35]</sup>

**2-(4-Hydroxyphenyl)propanoic acid (2g) / 3-(4-hydroxyphenyl)propanoic acid (2g')**

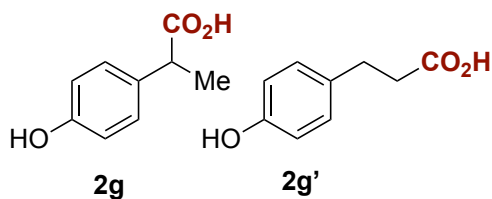

Following **GP4**, an inseparable mixture (85:15) of **2g/2g'** from **1g** (0.2 mmol) was obtained as a light crystalline solid (23.1 mg, 0.14 mmol, 70% yield).

**Branched acid 2g:**  $^1\text{H NMR}$  (400 MHz,  $\text{Acetone-}d_6$ )  $\delta$  (ppm) = 8.22 (br, 1H), 7.19 – 7.13 (m, 2H), 6.83 – 6.77 (m, 2H), 3.65 (q,  $J = 7.1$  Hz, 1H), 1.39 (d,  $J = 7.1$  Hz, 3H).  $^{13}\text{C NMR}$  (101 MHz,  $\text{Acetone-}d_6$ )  $\delta$  (ppm) = 176.0, 157.2, 133.0, 129.3, 116.1, 44.9, 19.2.

**Linear acid 2g'**:  $^1\text{H NMR}$  (400 MHz, Acetone- $d_6$ )  $\delta$  (ppm) = 8.08 (br, 1H), 7.07 (m, 2H), 6.76 – 6.73 (m, 2H), 2.81 (d,  $J = 7.5$  Hz, 2H), 2.55 (d,  $J = 7.8$  Hz, 2H).  $^{13}\text{C NMR}$  (101 MHz, Acetone- $d_6$ )  $\delta$  (ppm) = 174.1, 138.4, 132.6, 130.1, 115.4, 36.4, 30.8.

**HRMS (ESI)**:  $m/z$ : calc. for  $(\text{C}_9\text{H}_{10}\text{O}_3)^- [\text{M}-\text{H}]^-$ : 165.0557; found: 165.0559.

Spectroscopic data for **2g/2g'** match those previously reported in literature.<sup>[31],[36]</sup>

**2- (4- Acetamidophenyl)propanoic acid (2h) / 3- (4- acetamidophenyl)propanoic acid (2h')**

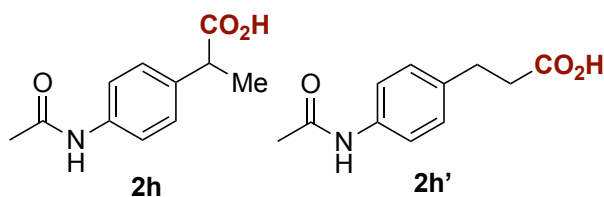

Following **GP4**, an inseparable mixture (90:10) of **2h/2h'** from **1h** (0.2 mmol) was obtained as an off-white solid (27.0 mg, 0.13 mmol, 65% yield).

**Branched acid 2h**:  $^1\text{H NMR}$  (400 MHz, Acetone- $d_6$ )  $\delta$  (ppm) = 9.13 (br, 1H), 7.59 (d,  $J = 8.6$  Hz, 2H), 7.25 (d,  $J = 8.6$  Hz, 2H), 3.70 (q,  $J = 7.1$  Hz, 1H), 2.06 (s, 3H), 1.41 (d,  $J = 7.1$  Hz, 3H).  $^{13}\text{C NMR}$  (101 MHz, Acetone- $d_6$ )  $\delta$  (ppm) = 175.8, 139.4, 137.0, 128.6, 120.1, 45.3, 24.3, 19.2.

**Linear acid 2h'**:  $^1\text{H NMR}$  (400 MHz, Acetone- $d_6$ )  $\delta$  (ppm) = 9.13 (br, 1H) [*overlapped with the major isomer*], 7.54 (d,  $J = 8.5$  Hz, 2H), 7.17 (d,  $J = 8.5$  Hz, 2H), 2.86 (t,  $J = 7.4$  Hz, 2H), 2.58 (t,  $J = 8.0$  Hz, 2H), 2.06 (s, 3H) [*overlapped with the major isomer*].  $^{13}\text{C NMR}$  (101 MHz, Acetone- $d_6$ )  $\delta$  (ppm) = 168.9, 139.3, 137.0 [*overlapped with the major isomer*], 129.4, 120.0, 36.1, 24.3, 20.6.

**HRMS (ESI)**:  $m/z$  calc. for  $(\text{C}_{11}\text{H}_{14}\text{NO}_3)^+ [\text{M}+\text{H}]^+$  208.0968; found: 208.0970.

**IR (ATR)**:  $\nu = 3321, 2926, 2859, 1692, 1644, 1595, 1536, 1454, 1405, 1316, 1256, 1211, 1182, 1118, 1074, 969, 839, 798, 745, 690 \text{ cm}^{-1}$ .

**2- (Naphthalen- 2- yl)propanoic acid (2i)/ 3- (naphthalen- 2- yl)propanoic acid (2i')**

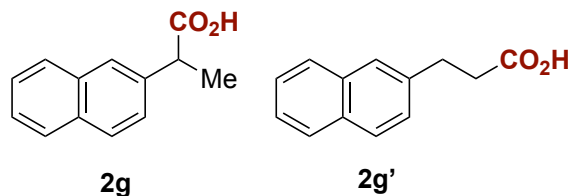

Following **GP4**, an inseparable mixture (93:7) of **2i/2i'** from **1i** (0.2 mmol) was obtained as a white solid (20.0 mg, 0.10 mmol, 49% yield).

**Branched acid 2i:** <sup>1</sup>H NMR (400 MHz, CDCl<sub>3</sub>) δ (ppm) = 7.86 – 7.78 (m, 3H), 7.77 (s, 1H), 7.53 – 7.40 (m, 3H), 3.92 (q, *J* = 7.1 Hz, 1H), 1.62 (d, *J* = 7.2 Hz, 3H). <sup>13</sup>C NMR (101 MHz, CDCl<sub>3</sub>) δ (ppm) = 180.7, 137.3, 133.5, 132.8, 128.5, 128.0, 127.8, 126.5, 126.4, 126.1, 125.8, 45.6, 18.3.

**Linear acid 2i':** <sup>1</sup>H NMR (400 MHz, CDCl<sub>3</sub>) δ (ppm) = 7.89 – 7.70 (m, 4H), 7.47 (m, 3H), 3.12 (t, *J* = 7.8 Hz, 2H), 2.78 (t, *J* = 7.8 Hz, 2H). <sup>13</sup>C NMR (101 MHz, CDCl<sub>3</sub>) δ (ppm) = 179.1, 137.7, 133.7, 132.3, 128.3, 127.7, 127.0, 126.6, 126.2, 125.6, 35.6, 30.8.

[Note: Some peaks are overlapped with the major isomer.]

**HRMS (ESI):** *m/z* calc. for (C<sub>13</sub>H<sub>11</sub>O<sub>2</sub>)<sup>-</sup> [M-H]<sup>-</sup>: 199.0765; found: 199.0766.

Spectroscopic data for **2i/2i'** match those previously reported in literature.<sup>[32]</sup>

**2- (4- Acetylphenyl)propanoic acid (2j)/ 3- (4- acetylphenyl)propanoic acid (2j')**

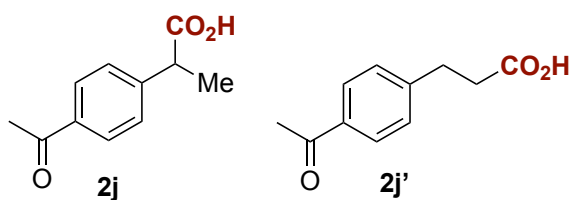

Following **GP4**, an inseparable mixture (85:15) of **2j/2j'** from **1j** (0.2 mmol) was obtained as a light-yellow gum (20.4 mg, 0.11 mmol, 53% yield).

**Branched acid 2j:** <sup>1</sup>H NMR (400 MHz, CDCl<sub>3</sub>) δ (ppm) = 7.92 (d, *J* = 8.3 Hz, 2H), 7.41 (d, *J* = 8.3 Hz, 2H), 3.81 (q, *J* = 7.2 Hz, 1H), 2.59 (s, 3H), 1.54 (d, *J* = 7.2 Hz, 3H). <sup>13</sup>C NMR (101 MHz, CDCl<sub>3</sub>) δ (ppm) = 198.0, 179.5, 145.2, 136.4, 128.9, 128.1, 45.5, 26.7, 18.1.

**Linear acid 2j':** <sup>1</sup>H NMR (400 MHz, CDCl<sub>3</sub>) δ (ppm) = 7.88 (dd, *J* = 8.1 Hz, 2H), 7.29 (d, *J* = 8.1 Hz, 2H), 3.00 (t, *J* = 7.6 Hz, 2H), 2.70 (t, *J* = 7.6 Hz, 2H), 2.58 (s, 3H). <sup>13</sup>C

**NMR (101 MHz, CDCl<sub>3</sub>)**  $\delta$  (ppm) = 198.1, 178.3, 146.0, 135.6, 128.9, 128.7, 35.1, 30.6, 26.7.

**MS (ESI):**  $m/z$  calc. for (C<sub>12</sub>H<sub>11</sub>O<sub>2</sub><sup>+</sup>) [M+H]<sup>+</sup>: 193.08; found: 193.09 (100%), 194.09 (10.8%), 195.09 (1.1%).

Spectroscopic data for **2j/2j'** match those previously reported in literature.<sup>[31], [35]</sup>

### Methyl 2- [4- (methoxycarbonyl)phenyl]propanoate (2k-Me)

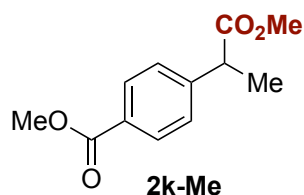

The product was obtained following **GP5**, then the crude carboxylic acid was converted into the corresponding methyl ester by treatment with a 2 M solution of TMSCH<sub>2</sub>N<sub>2</sub> (in Et<sub>2</sub>O) and purified by column chromatography, obtaining a colourless gum (21.0 mg, 0.09 mmol, 48% yield).

<sup>1</sup>H NMR (300 MHz, CDCl<sub>3</sub>) δ (ppm) = 8.03 – 7.96 (m, 2H), 7.40 – 7.33 (m, 2H), 3.91 (s, 3H), 3.78 (q, *J* = 6.9 Hz, 1H), 3.67 (s, 3H), 1.52 (d, *J* = 7.2 Hz, 3H). <sup>13</sup>C NMR (101 MHz, CDCl<sub>3</sub>) δ (ppm) = 174.3, 166.8, 145.6, 130.0, 129.1, 127.6, 52.2, 52.1, 45.5, 18.4. Spectroscopic data for **2k-Me** match those previously reported in literature.<sup>[37]</sup>

### 2- (1H- Indol- 3- yl)propanoic acid (2m) / 3- (1H- indol- 3- yl)propanoic acid (2m')

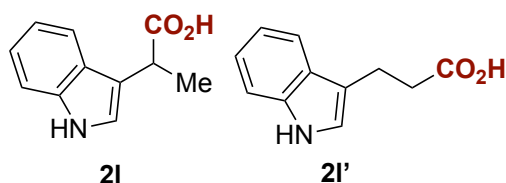

Following **GP4**, an inseparable mixture (80:20) of **2I/2I'** from **1I** (0.2 mmol) was obtained as a light-orange gum (14.3 mg, 0.08 mmol, 38% yield).

**Branched acid 2I:** <sup>1</sup>H NMR (400 MHz, CDCl<sub>3</sub>) δ (ppm) = 8.09 (br, 1H), 7.70 (d, *J* = 7.9 Hz, 1H), 7.38 – 7.34 (m, 1H), 7.23-7.18 (m, 1H), 7.17 – 7.11 (m, 2H), 4.05 (q, *J* = 7.2 Hz, 1H), 1.63 (d, *J* = 7.2 Hz, 3H). <sup>13</sup>C NMR (101 MHz, CDCl<sub>3</sub>) δ (ppm) = 180.8, 136.3, 126.5, 122.5, 121.9, 119.9, 119.4, 115.0, 111.4, 37.0, 17.6.

**Linear acid 2I':** <sup>1</sup>H NMR (400 MHz, CDCl<sub>3</sub>) δ (ppm) = 7.94 (s, 1H), 7.59 (d, *J* = 7.8 Hz, 1H), 7.35 (d, *J* = 8.0 Hz, 1H), 7.22 – 7.17 (m, 1H), 7.17 – 7.10 (m, 2H), 3.10 (d, *J* = 7.7 Hz, 2H), 2.76 (t, *J* = 7.7 Hz, 2H). <sup>13</sup>C NMR (101 MHz, CDCl<sub>3</sub>) δ (ppm) = 179.3, 136.4, 127.2, 122.2, 121.6, 119.5, 118.7, 114.7, 111.3, 34.7, 20.5. [Note: Some peaks are overlapped with the major isomer.]

**HRMS (ESI):** m/z: calc. for (C<sub>11</sub>H<sub>11</sub>N<sub>2</sub>O<sub>2</sub>)<sup>+</sup>[M+H]<sup>+</sup>: 190.0863; found: 190.0863.

Spectroscopic data for **2l**/**2l'** match those previously reported in literature.<sup>[38],[39]</sup>

## 2- (4- Methoxyphenyl)butanoic acid (**2m**)

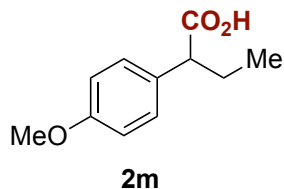

Following **GP4**, an **2m** from **1m** (0.2 mmol) was obtained as a light tan solid (5.1 mg, 22% yield).

<sup>1</sup>H NMR (400 MHz, CDCl<sub>3</sub>) δ (ppm) = 7.25 – 7.21 (m, 2H), 6.88 – 6.83 (m, 2H), 3.79 (s, 3H), 3.41 (t, *J* = 7.7 Hz, 1H), 2.14-2.00 (m, 1H), 1.85 – 1.70 (m, 1H), 0.90 (t, *J* = 7.4 Hz, 3H). <sup>13</sup>C NMR (101 MHz, CDCl<sub>3</sub>) δ (ppm) = 179.7, 159.1, 130.6, 129.2, 114.2, 55.4, 52.5, 26.5, 12.2.

Spectroscopic data for **2m** match those previously reported in literature.<sup>[40]</sup>

### 8.1.3 Scale up reaction for the photocarboxylation of **1a**

In a 100 ml Schlenk flask equipped with a teflon-coated stirring bar, a rubber septum and a CO<sub>2</sub> inlet, Hantzsch ester (1.39 g, 5.5 mmol, 1.5 equiv.), 4-CzIPN (29 mg, 36 μmol, 0.01 equiv.), (L1)NiBr<sub>2</sub> (78 mg, 183 μmol, 0.05 equiv.) and K<sub>2</sub>CO<sub>3</sub> (506 mg, 3.7 mmol, 1.0 equiv.) were added and then the system was purged-refilled three times with CO<sub>2</sub>. DMF (36 ml) and water (330 μl) were added, then vacuum was applied under stirring for 3 min followed by CO<sub>2</sub> bubbling for 5 min using a metal needle. Phenylethyl bromide **1a** (500 μl, 3.7 mmol, 1.0 equiv.) was added via a syringe, then the reaction was placed in a custom-made photoreactor and irradiated with 450 nm 12 LEDs array while CO<sub>2</sub> was constantly bubbled-through the solution. A cooling fan allowed to maintain the temperature of the reaction below 30°C. After 9 hours the bubbling was stopped and the CO<sub>2</sub> atmosphere was maintained for additional 15 h. After completion of the reaction, most of the solvent was removed under reduced pressure. The residue was partitioned between ethyl acetate (40 ml) and 2M HCl (20 ml), then the water layer was extracted twice more with ethyl acetate (40 ml each time). The combined organic layers were dried over magnesium sulfate, then the solvent was removed under reduced pressure. The residue was suspended in diethyl ether (40 ml), then extracted three times with 1M NaOH solution (40 ml each time) and the combined aqueous layers were washed twice with Et<sub>2</sub>O (40 ml each time). The water layer was acidified up to pH = 2 by the careful addition of concentrated HCl and then it was extracted three times with ethyl acetate (75 ml each time). The combined organic layers were dried over magnesium sulfate, then the solvent was removed under reduced pressure to afford hydratropic acid **2a** as a light-yellow viscous oil (265 mg, 48% yield).

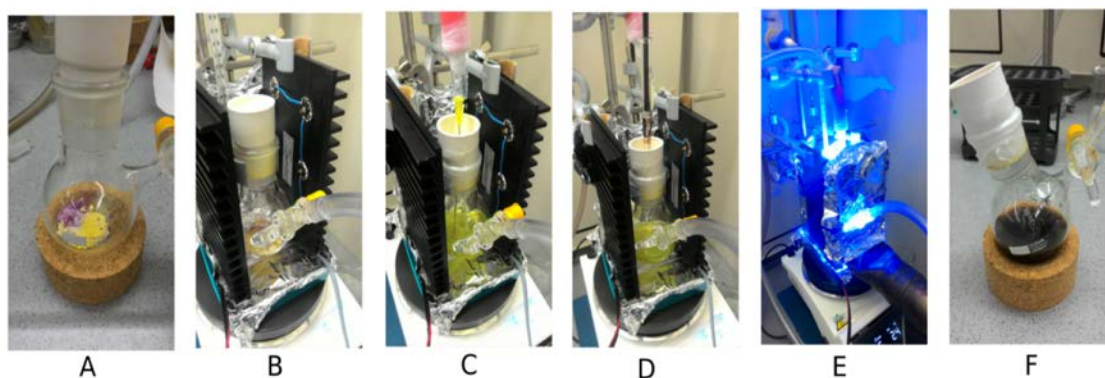

**Figure S1:** Experimental set-up for the millimolar scale carboxylation.



### 8.1.4 Additional examples

#### 2- (4- fluorophenyl)propanoic acid (**2n**) / 3- (4- fluorophenyl)propanoic acid (**2n'**)

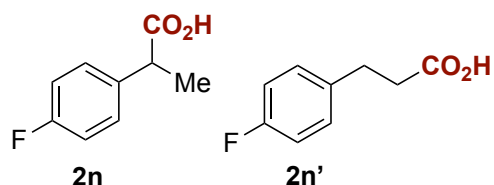

Following **GP4**, an inseparable mixture (85:15) of **2n/2n'** from **1n** (0.2 mmol) was obtained as a light-yellow gum (13.1 mg, 0.08 mmol, 39% yield).

**Branched acid 2n:**  $^1\text{H NMR}$  (400 MHz,  $\text{CDCl}_3$ )  $\delta$  (ppm) = 7.29 (m, 2H), 7.06 – 6.99 (m, 2H), 3.73 (q,  $J = 7.2$  Hz, 1H), 1.51 (d,  $J = 7.2$  Hz, 3H).  $^{13}\text{C NMR}$  (101 MHz,  $\text{CDCl}_3$ )  $\delta$  (ppm) = 180.5, 162.3 (d,  $^1J(^{19}\text{F}-^{13}\text{C}) = 245.8$  Hz), 135.5 (d,  $^4J(^{19}\text{F}-^{13}\text{C}) = 3.3$  Hz), 129.3 (d,  $^3J(^{19}\text{F}-^{13}\text{C}) = 8.2$  Hz), 115.7 (d,  $^2J(^{19}\text{F}-^{13}\text{C}) = 21.4$  Hz), 44.7, 18.4.  $^{19}\text{F NMR}$  (376 MHz,  $\text{CDCl}_3$ )  $\delta$  (ppm) = -115.3.

**Linear acid 2n':**  $^1\text{H NMR}$  (400 MHz,  $\text{CDCl}_3$ )  $\delta$  (ppm) = 7.19 – 7.12 (m, 2H), 7.00 (m, 2H), 2.92 (t,  $J = 7.6$  Hz, 2H), 2.65 (t,  $J = 7.6$  Hz, 2H).  $^{13}\text{C NMR}$  (101 MHz,  $\text{CDCl}_3$ )  $\delta$  (ppm) = 178.9, 161.5 (d,  $^1J(^{19}\text{F}-^{13}\text{C}) = 241.7$  Hz), 135.9 (d,  $^4J(^{19}\text{F}-^{13}\text{C}) = 3.1$  Hz), 129.9 (d,  $^3J(^{19}\text{F}-^{13}\text{C}) = 8.0$  Hz), 115.4 [overlapped multiplet with the other isomer], 35.8, 29.9.  $^{19}\text{F NMR}$  (376 MHz,  $\text{CDCl}_3$ )  $\delta$  (ppm) = -116.9.

**MS (ESI):**  $m/z$  calc. for  $(\text{C}_9\text{H}_{10}\text{O}_2\text{F}^+)$   $[\text{M}+\text{H}]^+$  169.06; found: 169.07 (100%), 170.07 (9.1), 171.07 (0.8).

Spectroscopic data for **2n/2n'** match those previously reported in literature.<sup>[31]</sup>

#### 2- (2- Methoxyphenyl)propanoic acid (**2o**) / 3- (2- methoxyphenyl)propanoic acid (**2o'**)

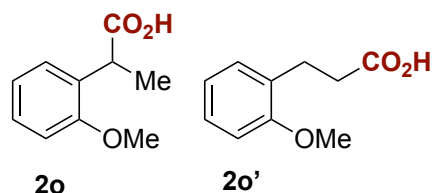

Following **GP4**, an inseparable mixture (90:10) of **2o/2o'** from **1o** (0.2 mmol) was obtained as a white solid (12.2 mg, 0.07 mmol, 34% yield).

**Branch acid 2o:**  $^1\text{H NMR}$  (300 MHz,  $\text{CDCl}_3$ )  $\delta$  (ppm) = 7.31 – 7.22 (m, 2H), 6.96 (td,  $J = 7.5, 1.1$  Hz, 1H), 6.89 (dd,  $J = 8.6, 1.1$  Hz, 1H), 4.09 (q,  $J = 7.2$  Hz, 1H), 3.83 (s, 3H),

1.49 (d,  $J = 7.2$  Hz, 2H).  $^{13}\text{C}$  NMR (75 MHz,  $\text{CDCl}_3$ )  $\delta$  (ppm) = 180.8, 156.8, 128.8, 128.5, 128.1, 120.9, 110.9, 55.6, 39.2, 17.0.

**Linear acid 2o'**:  $^1\text{H}$  NMR (300 MHz,  $\text{CDCl}_3$ )  $\delta$  (ppm) = 7.22 – 7.11 (m, 2H), 6.87 (m, 2H), 3.82 (s, 3H), 2.94 (t,  $J = 7.7$  Hz, 2H), 2.71 – 2.62 (m, 2H).  $^{13}\text{C}$  NMR (75 MHz,  $\text{CDCl}_3$ )  $\delta$  (ppm) =  $\delta$  130.1, 128.6, 127.8, 120.5, 110.3, 55.3, 34.0, 26.0. [Note: Some signals are below the detection limit or overlap with the major isomer.]

**HRMS (ESI)**:  $m/z$  calc. for  $(\text{C}_{10}\text{H}_{11}\text{O}_3)^-$   $[\text{M}-\text{H}]^-$ : 179.0714; found: 179.0716.

Spectroscopic data for **2o/2o'** match those previously reported in literature.<sup>[41],[42]</sup>

## 2- (3- methylphenyl)propanoic acid / 3- (3- methylphenyl)propanoic acid (2c)

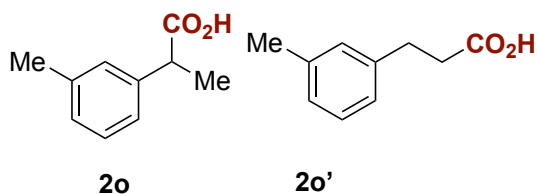

Following **GP4**, an inseparable mixture (90:10) of **2p/2p'** from **1p** (0.2 mmol) was obtained as a light-yellow gum (14.0 mg, 0.09 mmol, 43% yield).

**Branch acid 2p**:  $^1\text{H}$  NMR (300 MHz,  $\text{CDCl}_3$ )  $\delta$  (ppm) = 7.26 – 7.19 (m, 1H), 7.16 – 6.95 (m, 3H), 3.71 (q,  $J = 7.2$  Hz, 1H), 2.35 (s, 3H), 1.50 (d,  $J = 7.2$  Hz, 3H).  $^{13}\text{C}$  NMR (75 MHz,  $\text{CDCl}_3$ )  $\delta$  (ppm) = 180.7, 139.8, 138.5, 128.7, 128.4, 128.3, 124.7, 45.4, 21.6, 18.2.

**Linear acid 2p'**:  $^1\text{H}$  NMR (300 MHz,  $\text{CDCl}_3$ )  $\delta$  (ppm) = 7.26 – 7.17 (m, 1H), 7.17 – 6.89 (m, 4H), 2.91 (t,  $J = 7.8$  Hz, 1H), 2.67 (d,  $J = 7.8$  Hz, 1H), 2.33 (s, 2H).  $^{13}\text{C}$  NMR (75 MHz,  $\text{CDCl}_3$ )  $\delta$  (ppm) = 179.1, 140.2, 138.3, 129.2, 128.6, 127.2, 125.4, 45.4, 35.7, 30.5. [Note: Some signals are overlapped with the major isomer.]

**HRMS (ESI)**:  $m/z$  calc. for  $(\text{C}_{10}\text{H}_{12}\text{O}_2\text{Na}^+)$   $[\text{M}+\text{Na}]^+$ : 187.0730; found: 187.0728.

Spectroscopic data for **2p/2p'** match those previously reported in literature.<sup>[41],[31]</sup>

## 8.2 Photocarboxylation reactions en route to primary carboxylic acids

### 8.2.1 General procedure (GP5)

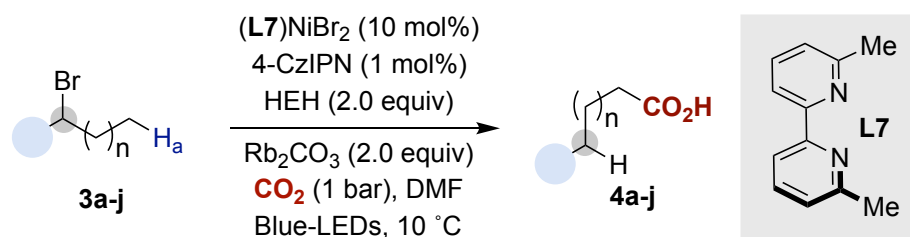

An oven-dried Schlenk tube containing a magnetic stir bar was charged with (L7)NiBr<sub>2</sub> (0.10 equiv.), 4-CzIPN (0.01 equiv.), Hantzsch ester (HEH, 2.00 equiv.), tetra-*n*-butylammonium iodide (TBAI, 1.00 equiv., if it is necessary) and the alkyl bromide (1.00 equiv., if it is solid). The Schlenk tube was then taken inside a glovebox, where Rb<sub>2</sub>CO<sub>3</sub> (2.00 equiv) was added. The tube was then taken out of the glovebox and connected to a vacuum line where it was evacuated and back-filled under CO<sub>2</sub> flow at least three times. The alkyl bromide (1.0 equiv, if it is liquid) and DMF (0.08M) were added under CO<sub>2</sub> flow. Once all the components were added, the Schlenk tube was closed at the atmospheric pressure of CO<sub>2</sub> (1 bar) and placed at a temperature-controlled photo-reactor maintained at 10 °C and stirred for 20 h in the presence of continuous light irradiation from blue LEDs ( $\lambda = 451$  nm). The reaction mixture was quenched with 2 M HCl aq. solution to release free acid by hydrolysis of carboxylate salt and diluted with ethyl acetate. The combined organic layers were extracted with ethyl acetate (at least three times), washed with water followed by brine solution, dried over MgSO<sub>4</sub> and concentrated under reduced pressure. Then the crude mixture was dissolved in diethyl ether and the organic phase was three times extracted with aq. 1M NaOH solution. The combined aqueous phase was washed once again with diethyl ether and neutralized to pH = 2 using 2 M HCl aqueous solution. Finally, the acidic aqueous phase was three times extracted with ethyl acetate. The removal of solvent under reduced pressure delivered the pure carboxylic acid.

## 8.2.2 Characterization data

### 1-Octanoic acid (4a).

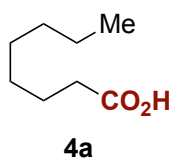

Following **GP5** starting from 2-Bromoheptane (**3a**, 44.8 mg, 0.25 mmol) afforded the title compound **4a** as a colorless oil (17.30 mg, 0.12 mmol, 48 %) in 83:17 rr.

Following **GP5** starting from 2-Bromoheptane (**3a**, 44.8 mg, 0.25 mmol) in the presence of TBAI (92.6 mg, 0.25 mmol, 1.0 equiv.) as additive afforded the title compound **4a** as a colorless oil (17.30 mg, 0.12 mmol, 48 %) in 99:1 rr.

Following **GP5** starting from 3-Bromoheptane (**3a**, 44.8 mg, 0.25 mmol) in the presence of TBAI (92.6 mg, 0.25 mmol, 1.0 equiv.) as additive afforded the title compound **4a** as a colorless oil (15.3 mg, 0.106 mmol, 42 %) in 99:1 rr.

**<sup>1</sup>H NMR (400 MHz, CDCl<sub>3</sub>):**  $\delta$  (ppm) = 2.35 (t,  $J$  = 7.5 Hz, 2H), 1.67 – 1.60 (m, 2H), 1.35 – 1.25 (m, 8H), 0.88 (t,  $J$  = 6.9 Hz, 3H).

**<sup>13</sup>C NMR (101 MHz, CDCl<sub>3</sub>):**  $\delta$  (ppm) = 180.2, 34.3, 31.8, 29.2, 29.1, 24.9, 22.7, 14.2.

Spectroscopic data for **4a** match those previously reported in literature.<sup>[18]</sup>

### 6-Methylheptanoic acid (4b).

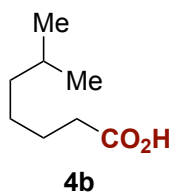

Following **GP5** starting from 2-Bromo-5-methylhexane (**3b**, 44.5 mg, 0.25 mmol) in the presence of TBAI (92.6 mg, 0.25 mmol, 1.0 equiv.) as additive afforded the title compound **4b** as a light-yellow oil (16.0 mg, 0.111 mmol, 44 %) in 99:1 rr.

**<sup>1</sup>H NMR (400 MHz, CDCl<sub>3</sub>):**  $\delta$  (ppm) = 2.35 (t,  $J$  = 7.5 Hz, 2H), 1.62 (p,  $J$  = 7.5 Hz, 2H), 1.57 – 1.49 (m, 1H), 1.38 – 1.30 (m, 2H), 1.21 – 1.16 (m, 2H), 0.87 (d,  $J$  = 6.6 Hz, 6H).

$^{13}\text{C}$  NMR (101 MHz,  $\text{CDCl}_3$ ):  $\delta$  (ppm) = 179.7, 38.7, 34.1, 28.0, 27.0, 25.1, 22.7.

Spectroscopic data for **4b** match those previously reported in literature.<sup>[43]</sup>

#### 6-Phenylhexanoic acid (**4c**).

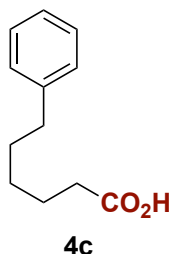

Following **GP5** starting from (4-bromopentyl)benzene (**3c**, 56.8 mg, 0.25 mmol) afforded the title compound **4c** as a light-yellow oil (25.0 mg, 0.13 mmol, 52 %) in 99:1 rr.

Following **GP4**, the title compound **4c** from (4-bromopentyl)benzene (**3c**, 56.8 mg, 0.25 mmol) was obtained as a light-yellow oil (3.0 mg, 0.02 mmol, 6%). No benzylic carboxylation product was detected.

$^1\text{H}$  NMR (300 MHz,  $\text{CDCl}_3$ ):  $\delta$  (ppm) = 7.35 – 7.27 (m, 2H), 7.20 – 7.16 (m, 3H), 2.36 (t,  $J$  = 7.6 Hz, 2H), 2.36 (t,  $J$  = 7.5 Hz, 2H), 1.73 – 1.60 (m, 4H), 1.45 – 1.34 (m, 2H).

$^{13}\text{C}$  NMR (75 MHz,  $\text{CDCl}_3$ ):  $\delta$  (ppm) = 180.2, 142.6, 128.5, 128.4, 125.8, 35.8, 34.1, 31.2, 28.8, 24.7.

Spectroscopic data for **4c** match those previously reported in literature.<sup>[44]</sup>

#### Heptanedioic acid (**4d**).

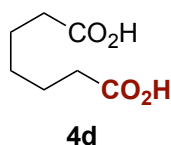

Following **GP5** starting from Methyl 5-bromohexanoate (**3d**, 52.3 mg, 0.25 mmol) afforded the title compound **4d** as a light-yellow viscous liquid (16.0 mg, 0.10 mmol, 40 %) in 99:1 rr upon hydrolysis of ester during work-up.

$^1\text{H}$  NMR (300 MHz,  $\text{DMSO}-d_6$ ):  $\delta$  (ppm) = 12.00 (s, 2H), 2.19 (t,  $J$  = 7.3 Hz, 4H), 1.53 – 1.43 (m, 4H), 1.33 – 1.21 (m, 2H).

$^{13}\text{C}$  NMR (75 MHz, DMSO- $d_6$ ):  $\delta$  (ppm) = 174.4, 33.5, 28.1, 24.2.

Spectroscopic data for **4d** match those previously reported in literature.<sup>[45]</sup>

#### 10-Chlorodecanoic acid (**4e**).

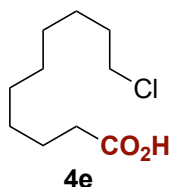

Following **GP5** starting from 8-Bromo-1-chlorononane (**3e**, 60.4 mg, 0.25 mmol) afforded the title compound **4e** as a colorless oil (29.0 mg, 0.14 mmol, 56 %) in 80:20 rr.

Following **GP-5** starting from 8-Bromo-1-chlorononane (**3e**, 60.4 mg, 0.25 mmol) in the presence of TBAI (92.6 mg, 0.25 mmol, 1.0 equiv.) as additive afforded the title compound **4e** as colorless oil (24.0 mg, 0.116 mmol, 46 %) in 99:1 rr.

$^1\text{H}$  NMR (300 MHz,  $\text{CDCl}_3$ ):  $\delta$  (ppm) = 3.53 (t,  $J$  = 6.7 Hz, 2H), 3.53 (t,  $J$  = 6.7 Hz, 2H), 1.81 – 1.71 (m, 2H), 1.68 – 1.58 (m, 2H), 1.47 – 1.39 (m, 2H), 1.36 – 1.25 (m, 8H).

$^{13}\text{C}$  NMR (101 MHz,  $\text{CDCl}_3$ ):  $\delta$  (ppm) = 180.1, 45.3, 34.2, 32.8, 29.4, 29.3, 29.1, 28.9, 27.0, 24.8.

Spectroscopic data for **4e** match those previously reported in literature.<sup>[18]</sup>

#### 7-Cyano-7-methyloctanoic acid (**4f**).

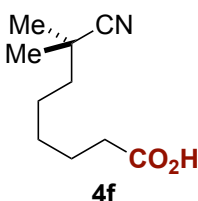

Following **GP5** starting from 6-Bromo-2,2-dimethylheptanenitrile (**3f**, 54.5 mg, 0.25 mmol) afforded the title compound **4f** as a colorless oil (23.0 mg, 0.126 mmol, 50 %) in 99:1 rr.

$^1\text{H}$  NMR (300 MHz,  $\text{CDCl}_3$ ):  $\delta$  (ppm) = 2.37 (t,  $J$  = 7.4 Hz, 2H), 1.67 (quin,  $J$  = 7.4 Hz, 2H), 1.54 – 1.46 (m, 4H), 1.43 – 1.36 (m, 2H), 1.33 (s, 6H).

**<sup>13</sup>C NMR (75 MHz, CDCl<sub>3</sub>):** δ (ppm) = 180.0, 125.2, 40.9, 34.0, 32.5, 29.1, 26.8, 25.1, 24.5.

**IR (ATR):** ν = 2975, 2954, 2234, 1709, 1470, 1425, 1301, 1255, 1203, 945 cm<sup>-1</sup>.

**HRMS (ESI):** m/z calc. for (C<sub>10</sub>H<sub>17</sub>NO<sub>2</sub><sup>-</sup>) [M-H]<sup>-</sup>: 182.1187; found: 182.1183.

**6-(1*H*-Indol-1-yl)hexanoic acid (4g).**

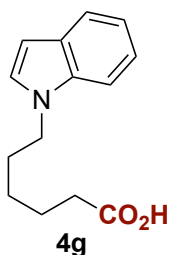

Following **GP5** starting from 1-(4-bromopentyl)-1*H*-indole (**3g**, 66.6 mg, 0.25 mmol) in the presence of TBAI (92.6 mg, 0.25 mmol, 1.0 equiv.) as additive afforded the title compound **4g** as light-yellow oil (27.0 mg, 0.117 mmol, 46 %) in 94:6 rr.

<sup>1</sup>H NMR (400 MHz, CDCl<sub>3</sub>): δ (ppm) = 7.66 (dt, *J* = 7.8, 1.0 Hz, 1H), 7.35 (dd, *J* = 8.3, 0.9 Hz, 1H), 7.23 (ddd, *J* = 8.2, 7.0, 1.2 Hz, 1H), 7.15 – 7.08 (m, 2H), 6.51 (dd, *J* = 3.1, 0.9 Hz, 1H), 4.14 (t, *J* = 7.1 Hz, 2H), 2.35 (t, *J* = 7.4 Hz, 2H), 1.93 – 1.84 (m, 2H), 1.72 – 1.64 (m, 2H), 1.44 – 1.35 (m, 2H).

<sup>13</sup>C NMR (101 MHz, CDCl<sub>3</sub>): δ (ppm) = 179.9, 136.0, 128.7, 127.9, 121.5, 121.1, 119.4, 109.4, 101.2, 46.2, 33.9, 30.0, 26.5, 24.4.

Spectroscopic data for **4g** match those previously reported in literature.<sup>[18]</sup>

**5-(6-Methoxynaphthalen-2-yl)pentanoic acid (4h).**

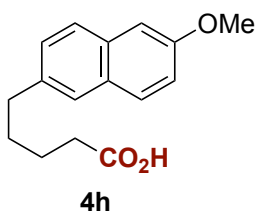

Following **GP5** starting from 2-(3-bromobutyl)-6-methoxynaphthalene (**3h**, 73.3 mg, 0.25 mmol) in the presence of TBAI (92.6 mg, 0.25 mmol, 1.0 equiv.) afforded the title compound **4h** as a white solid (32.0 mg, 0.124 mmol, 50 %) in 99:1 rr.

Following **GP4**, the title compound **4h** from 2-(3-bromobutyl)-6-methoxynaphthalene (**3h**, 73.3 mg, 0.25 mmol) was obtained as a white solid (3.0 mg, 0.01 mmol, <5%). No benzylic carboxylation product was detected.



**<sup>1</sup>H NMR (300 MHz, CDCl<sub>3</sub>):** δ (ppm) = 7.67 (d, *J* = 8.2 Hz, 2H), 7.54 (s, 1H), 7.29 (dd, *J* = 8.4, 1.6 Hz, 1H), 7.15 – 7.11 (m, 1H), 7.11 (s, 1H), 3.91 (s, 3H), 2.77 (t, *J* = 7.0 Hz, 2H), 2.40 (t, *J* = 6.9 Hz, 2H), 1.76 – 1.70 (m, 2H).

**<sup>13</sup>C NMR (75 MHz, CDCl<sub>3</sub>):** δ (ppm) = 179.8, 157.3, 137.3, 133.1, 129.2, 129.0, 127.9, 126.9, 126.4, 118.8, 105.8, 55.4, 35.6, 34.0, 30.9, 24.4.

**Melting Point:** 110-115 °C

Spectroscopic data for **4h** match those previously reported in literature.<sup>[46]</sup>

**6-(4-Acetamidophenoxy)hexanoic acid (4i).**

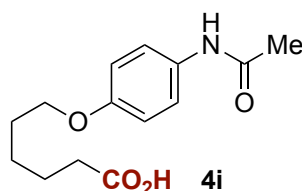

Following **GP5** starting from *N*-(4-((4-bromopentyl)oxy)phenyl)acetamide (**3i**, 75.0 mg, 0.25 mmol) afforded the title compound **4i** as a white solid (35.0 mg, 0.132 mmol, 53 %) in 99:1 rr.

**<sup>1</sup>H NMR (300 MHz, DMSO-*d*<sub>6</sub>):** δ (ppm) = 12.01 (s, 1H), 9.75 (s, 1H), 7.45 (d, *J* = 9.0 Hz, 2H), 6.84 (d, *J* = 9.0 Hz, 2H), 3.89 (t, *J* = 6.4 Hz, 2H), 2.22 (t, *J* = 7.2 Hz, 2H), 1.99 (s, 3H), 2.73 – 2.64 (m, 2H), 1.49 – 1.60 (m, 2H), 1.45 – 1.35 (m, 2H).

**<sup>13</sup>C NMR (75 MHz, DMSO-*d*<sub>6</sub>):** δ (ppm) = 174.5, 167.7, 154.4, 132.5, 120.5, 114.4, 67.4, 33.6, 28.5, 25.2, 24.3, 23.8.

**IR (ATR):** ν = 3305, 3046, 2950, 2872, 1690, 1660, 1600, 1532, 1512, 1474, 1410, 1301, 1243, 1203, 1110, 1045, 1025, 1010, 828 cm<sup>-1</sup>.

**HRMS (ESI):** *m/z* calc. for (C<sub>14</sub>H<sub>18</sub>NO<sub>4</sub>)<sup>-</sup> [M-H]<sup>-</sup>: 264.1241; found: 264.1251.

**Melting Point:** 116-118 °C

**6-(2-Benzoylphenoxy)hexanoic acid (4j).**

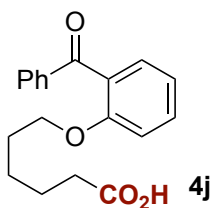

Following **GP5** starting from (2-((4-bromopentyl)oxy)phenyl)(phenyl)methanone (**3j**, 86.6 mg, 0.25 mmol) afforded the title compound **4j** as a colorless oil (40.0 mg, 0.128 mmol, 51 %) in 99:1 rr. Note: After acid-base extraction, the compound was further purified by flash column chromatography (eluent: hexane:ethyl acetate = 9:1 to 1:1).

**<sup>1</sup>H NMR (400 MHz, CDCl<sub>3</sub>):**  $\delta$  (ppm) = 7.77 (dd,  $J$  = 8.3, 1.3 Hz, 2H), 7.56 – 7.51 (m, 1H), 7.47 – 7.39 (m, 4H), 7.04 (td,  $J$  = 7.5, 0.9 Hz, 1H), 6.93 (d,  $J$  = 8.2 Hz, 1H), 3.87 (t,  $J$  = 6.1 Hz, 2H), 2.18 (t,  $J$  = 7.6 Hz, 2H), 1.48 – 1.41 (m, 4H), 1.07 – 1.00 (m, 2H).

**<sup>13</sup>C NMR (101 MHz, CDCl<sub>3</sub>):**  $\delta$  (ppm) = 197.1, 179.4, 157.0, 138.6, 132.8, 132.2, 129.9, 129.6, 129.2, 128.3, 120.8, 112.2, 67.9, 33.8, 28.7, 25.3, 24.3.

Spectroscopic data for **4j** match those previously reported in literature.<sup>[18]</sup>

### 8.2.3 Regioconvergent photocarboxylation of *n*-heptane

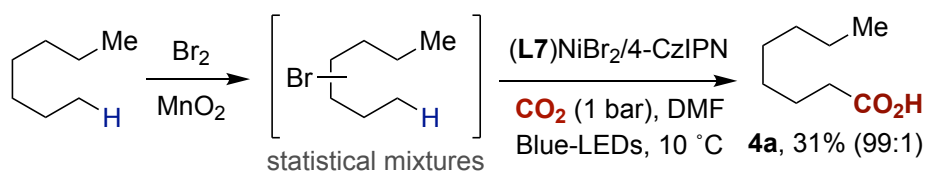

**Bromination step:** According to the literature report,<sup>[18]</sup> *n*-heptane (1.25 mL), MnO<sub>2</sub> (44.0 mg, 0.50 mmol, 2.0 equiv) and Br<sub>2</sub> (13 μL, 0.25 mmol, 1.0 equiv) were added to a Schlenk tube and heated at 60 °C for 4 h. The reaction was filtered through a plug of Celite, washing with *n*-pentane (5 mL). The filtrate was washed once with water (5 mL). The organic layer was then dried over anhydrous MgSO<sub>4</sub> and filtrate. Finally, the *n*-pentane was carefully evaporated in a rotatory evaporator. The crude mixture of isomeric bromoheptanes and the excess of *n*-heptane were directly used for the carboxylation step without any purification.

**Carboxylation step.** An oven-dried Schlenk tube containing a magnetic stir bar was charged with (L7)NiBr<sub>2</sub> (10.1 mg, 0.025 mmol, 0.1 equiv), 4-CzIPN (1.9 mg, 0.0025 mmol, 0.01 equiv), Hantzsch ester (HEH, 127 mg, 0.50 mmol, 2.00 equiv). The Schlenk tube was then taken inside a glovebox, where Rb<sub>2</sub>CO<sub>3</sub> (115 mg, 0.50 mmol, 2.00 equiv) was added. The tube was then taken out of the glovebox and connected to a vacuum line where it was evacuated and back-filled under CO<sub>2</sub> flow at least three times. The crude statistical mixture of bromoheptanes and DMF (3 mL) were added under CO<sub>2</sub> flow. Once all the components were added, the Schlenk tube was closed at the atmospheric pressure of CO<sub>2</sub> (1 bar) and placed at a temperature-controlled photo-reactor maintained at 10 °C and stirred for 20 h in the presence of continuous light irradiation from blue LEDs (λ = 451 nm). The reaction mixture was quenched with 2M HCl aq. solution to release free acid by hydrolysis of carboxylate salt and diluted with ethyl acetate. The combined organic layers were extracted with ethyl acetate (at least three times), washed with water followed by brine solution, dried over MgSO<sub>4</sub> and concentrated under reduced pressure. Then the crude mixture was dissolved in diethyl ether and the organic phase was three times extracted with aq. 1M NaOH solution. The combined aqueous phase was washed once again with diethyl ether and neutralized to pH = 2 using 2M HCl aqueous solution. Finally, the acidic aqueous phase was three times extracted with ethyl acetate. The removal of solvent under reduced pressure delivered the pure carboxylic acid (11 mg, 0.08 mmol, 31%).

## 8.2.4 Regioconvergent photocarboxylation of statistical mixture of bromoheptanes

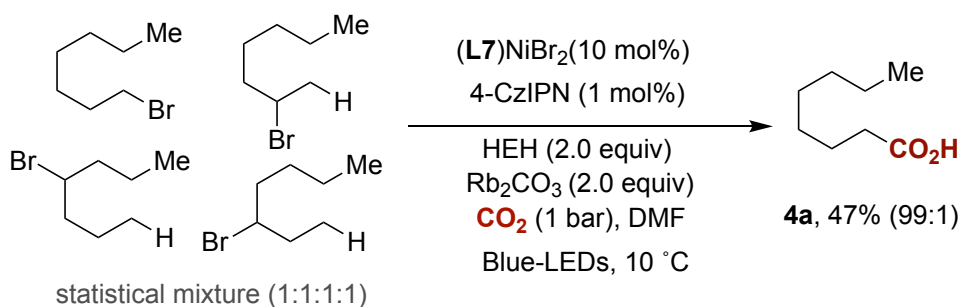

An oven-dried Schlenk tube containing a magnetic stir bar was charged with (L7)NiBr<sub>2</sub> (10.1 mg, 0.025 mmol, 0.1 equiv), 4-CzIPN (1.9 mg, 0.0025 mmol, 0.01 equiv), Hantzsch ester (HEH, 127 mg, 0.50 mmol, 2.00 equiv). The Schlenk tube was then taken inside a glovebox, where Rb<sub>2</sub>CO<sub>3</sub> (115 mg, 0.50 mmol, 2.00 equiv) was added. The tube was then taken out of the glovebox and connected to a vacuum line where it was evacuated and back-filled under CO<sub>2</sub> flow at least three times. The 1:1:1:1 mixture of bromoheptanes (10 μL 1-bromoheptane, 10 μL 2-bromoheptane, 10 μL 3-bromoheptane and 10 μL 4-bromoheptane, 0.25 mmol, 1.0 equiv) and DMF (3 mL) were added under CO<sub>2</sub> flow. Once all the components were added, the Schlenk tube was closed at the atmospheric pressure of CO<sub>2</sub> (1 bar) and placed at a temperature-controlled photo-reactor maintained at 10 °C and stirred for 20 h in the presence of continuous light irradiation from blue LEDs (λ = 451 nm). The reaction mixture was quenched with 2M HCl aq. solution to release free acid by hydrolysis of carboxylate salt and diluted with ethyl acetate. The combined organic layers were extracted with ethyl acetate (at least three times), washed with water followed by brine solution, dried over MgSO<sub>4</sub> and concentrated under reduced pressure. Then the crude mixture was dissolved in diethyl ether and the organic phase was three times extracted with aq. 1M NaOH solution. The combined aqueous phase was washed once again with diethyl ether and neutralized to pH = 2 using 2M HCl aqueous solution. Finally, the acidic aqueous phase was three times extracted with ethyl acetate. The removal of solvent under reduced pressure delivered the pure carboxylic acid (17 mg, 0.12 mmol, 47%).

## 9 Mechanistic Investigation

### 9.1 Photocarboxylation of homobenzylic bromides

#### 9.1.1 Kinetic profile of the model reaction

In kinetic analysis, the consumption of homobenzylic bromide (**1a**) and the formation of the putative intermediate styrene **6** and the byproduct ethylbenzene **7** was detected at different time interval by GC-FID. The formation of acids **2a/2a'** at different time interval was followed by  $^1\text{H}$  NMR using 1,3,5-trimethoxy benzene as internal reference.

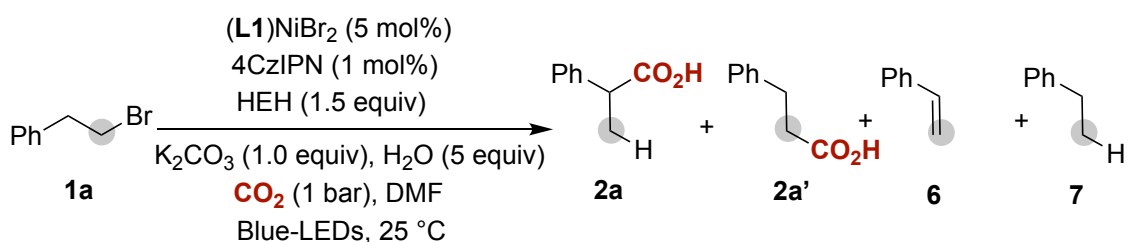

The photocarboxylation of model substrate **1a** was conducted for 120 min following **GP4**. After appropriate time interval, an aliquot of the reaction solution was collected using a Hamilton syringe, which was previously purged three times under  $\text{CO}_2$  atmosphere, and added to the stock solution of ethyl acetate containing 1,3,5-trimethoxybenzene as internal standard. The obtained solution was filtered through a Macherey-Nagel CHROMAFIL<sup>®</sup> O-20/15 MS PTFE filter and analyzed by GC-FID to calculate the amount of remaining starting material (**1a**), styrene-intermediate **6** and the byproduct ethylbenzene (**7**) at different time interval. To follow the acid formation, several reactions (one for each desired time) were set up according to the **GP4** and then the reaction was quenched with 2M HCl after the desired time and extracted three times with ethyl acetate. To the combined organic layer the internal standard 1,3,5-trimethoxybenzene was added, then an aliquot of the solution was dried under reduced pressure followed by high vacuum to remove most of the residual DMF. The crude mixture was analyzed by  $^1\text{H}$  NMR to calculate the amount of acids **2a/2a'** formed.

In Figure S2, the kinetic plot reveals that the starting material (**1a**) was fully consumed within one hour and the desired product can be obtained. Interestingly, a small and almost constant amount of styrene **6** was detected during the reaction, but its amount decayed to zero when the reaction completed. This observation suggests that the styrene **6** could be potential intermediate in this process. However, the formation of byproduct ethylbenzene (**7**) continued over the time.

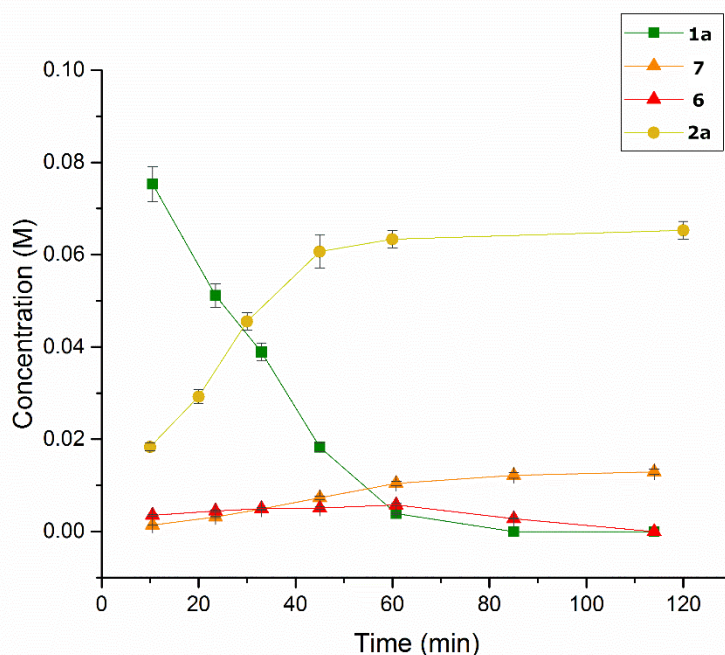

**Figure S2:** Kinetic profile of the photocarboxylation of substrate (**1a**) with CO<sub>2</sub>.

### 9.1.2 Intermittent illumination experiment

In order to verify if the continuous illumination was required for the reaction, the intermittent illumination of the reaction was performed. The reaction was set-up according to **GP4** and the illumination was alternatively switched on or off (0-10 min: ON; 10-20 min: OFF; 20-35 min: ON; 35-60 min: OFF). The following sampling protocol was used: a 50  $\mu$ l aliquot of the reaction solution was collected using a Hamilton syringe, which was previously purged three times under CO<sub>2</sub> atmosphere, then dissolved in an ethyl acetate stock solution containing internal standard. The obtained solution was filtered through a Macherey-Nagel CHROMAFIL<sup>®</sup> O-20/15 MS PTFE filter and analyzed using GC-FID.

In Figure S3, the plot demonstrates that the reaction can only proceed in the presence of LED illumination (white zones). No significant conversion was observed when the illumination was switched off (dark regions).

**Table S3:** Kinetic profile of the consumption of **1a** upon intermittent irradiation.

| Min.                                   | 5   | 10  | 15  | 20  | 25  | 35  | 50  |
|----------------------------------------|-----|-----|-----|-----|-----|-----|-----|
| $[\mathbf{1a}]/\text{M}\times 10^{-2}$ | 8.5 | 7.0 | 7.1 | 6.8 | 5.7 | 3.2 | 3.0 |

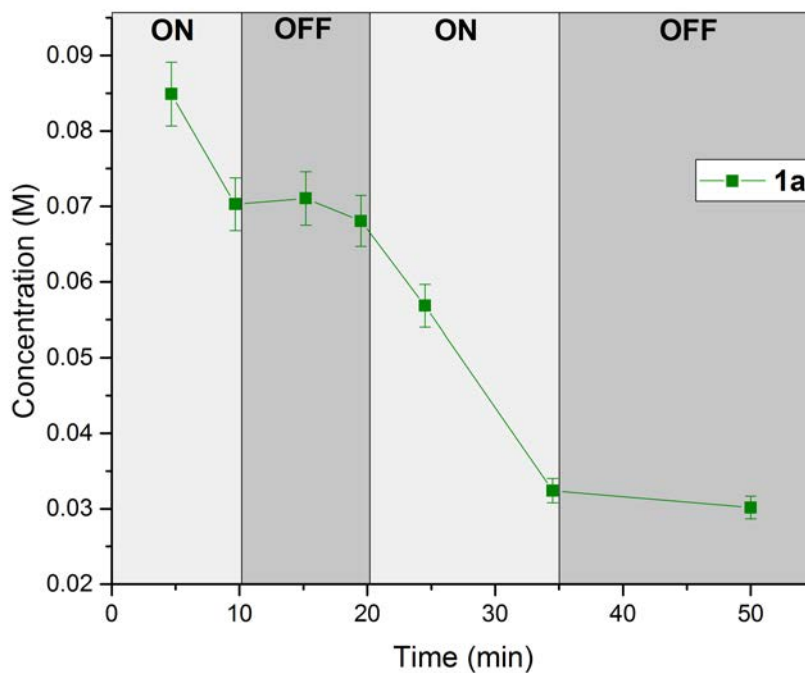

**Figure S3:** Kinetic profile of the photocarboxylation of substrate (**1a**) under intermittent illumination.

### 9.1.3 Deuterium labelling experiments

#### Photocarboxylation of (non)deuterated substrate **1e** and **1e-d<sub>2</sub>**

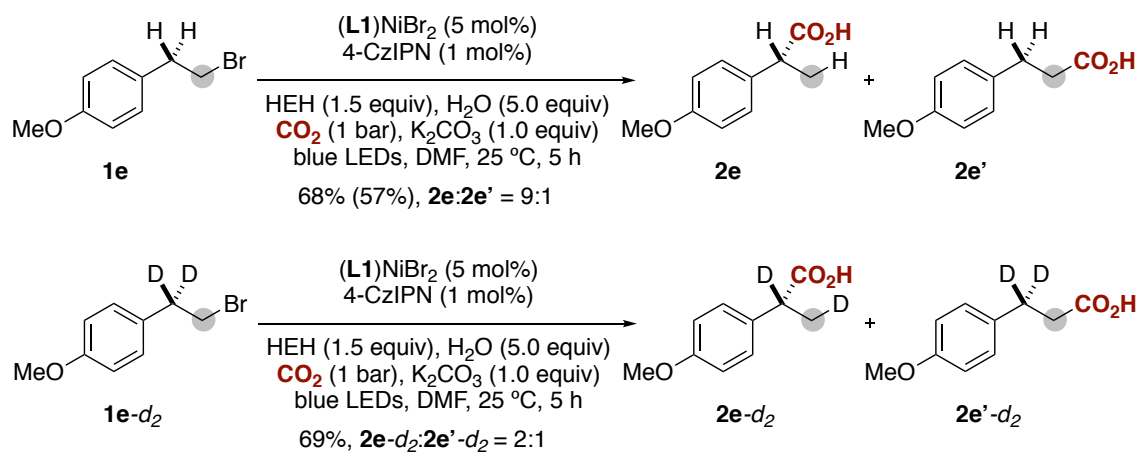

Following **GP4**, the photocarboxylation of non-deuterated substrate **1e** and deuterated substrate **1e-d<sub>2</sub>** were independently performed. Both the substrates **1e** and **1e-d<sub>2</sub>** delivered corresponding acids **2e/2e'** and **2e-d<sub>2</sub>/2e'-d<sub>2</sub>** in 68% yields. However, the selectivity was different such as **2e/2e'** were obtained in 9:1 ratio, while **2e-d<sub>2</sub>/2e'-d<sub>2</sub>** were delivered in 2.1:1. As described by the LC-MS spectra (Figure S4), the acids **2e-d<sub>2</sub>/2e'-d<sub>2</sub>** contain almost all the deuterium within the molecules, thus dictating no H/D exchange with other reagents.

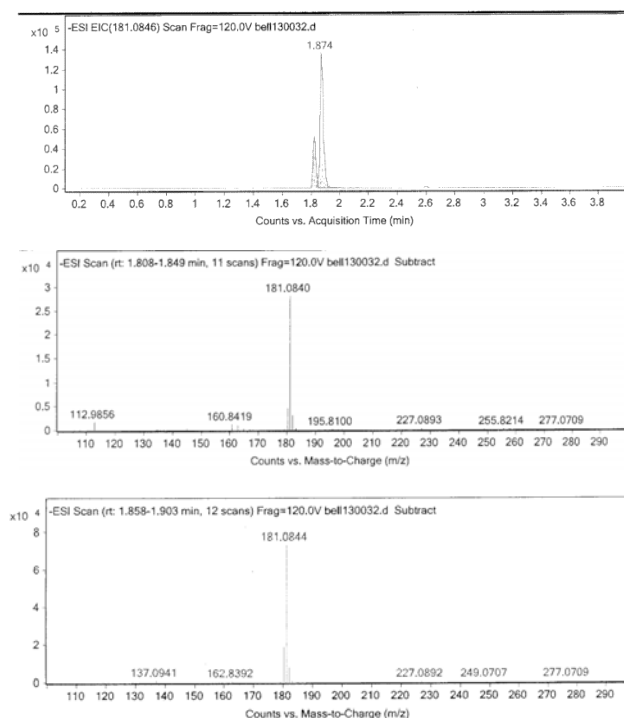

**Figure S4:** LC-MS spectra (negative mode) of **2e-d<sub>2</sub>/2e'-d<sub>2</sub>**.

### Intermolecular competition experiment between **1e** and **1e-d<sub>2</sub>**

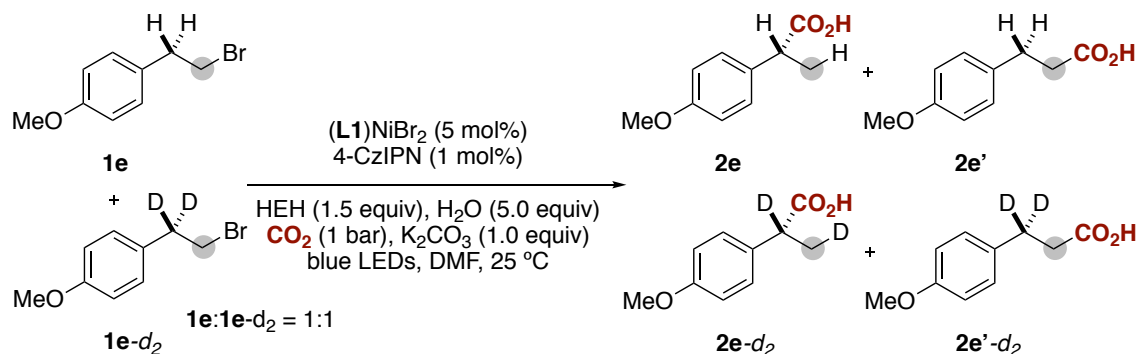

To measure the kinetic isotope effect, the intermolecular competition experiment was performed with the equimolar mixture of **1e** and **1e-d<sub>2</sub>** following the procedure **GP4**. The



sampling was performed after 10 and 20 min. After 10 min, 100  $\mu\text{l}$  aliquot of the reaction mixture was collected using a Hamilton syringe, which was previously purged three times under  $\text{CO}_2$  atmosphere and then dissolved in 1 mL ethyl acetate and the obtained solution was filtered through a Macherey-Nagel CHROMAFIL<sup>®</sup> O-20/15 MS PTFE filter and analyzed by high-resolution mass spectroscopy. The sampling procedure was repeated after 20 min. The isotopic pattern of the peak associated with the branched product **2e**/**2e-d<sub>2</sub>** was analyzed by the comparison with the expected natural abundance pattern and the relative amounts of **2e** and **2e-d<sub>2</sub>** were determined (Figure S5). The obtained kinetic isotope effect (KIE) value is as follow:

KIE (10 min): 1.00    KIE (20 min): 0.98    **KIE (average): 0.99 $\pm$ 0.01**

In summary, by analyzing the initial rates of the reaction, no kinetic isotope effect was observed, therefore suggesting that the  $\beta$ -elimination step is not rate determining.

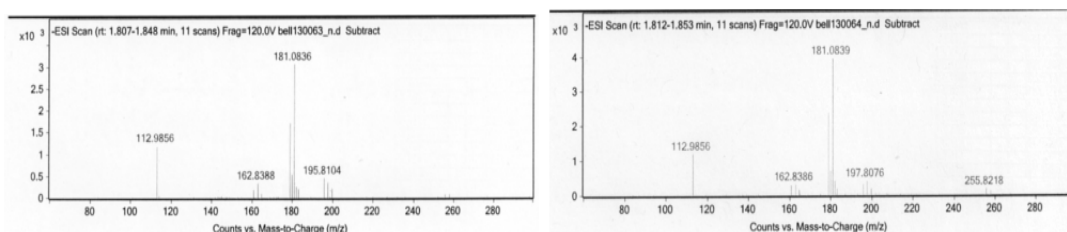

**Figure S5:** Isotope pattern of products **2e** and **2e-d<sub>2</sub>** after 10 min and 20 min.

### Scrambling between deuterated substrate (**1e-d<sub>2</sub>**) & non-deuterated substrate (**1h**)

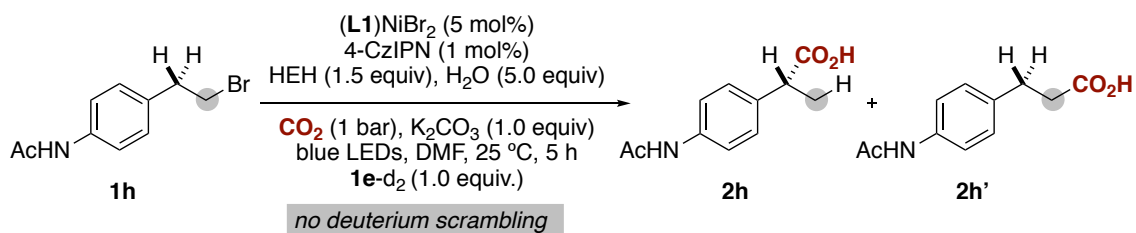

In order to assess the scrambling of hydrogen atoms during the reaction, the photocarboxylation of non-deuterated **1h** was performed in the presence of 1.0 equivalent of deuterium substrate **1e-d<sub>2</sub>** following GP4. The analysis of the reaction mixture by mass spectroscopy revealed that no deuterium scrambling with **1h** occurred under the reaction conditions (for **2h**, M-H: 100%, M-H+1: 12.5, M-H+2: 1.3%). This result suggests that

the migratory insertion that follows the elimination step is fast and no H/D scrambling occurs.

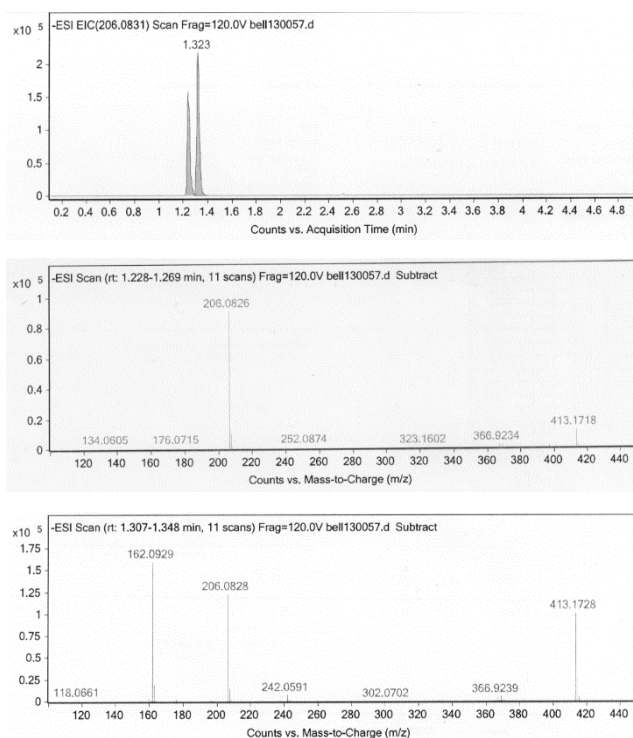

**Figure S6:** LC-MS spectra of the product **2h** and **2h'**.

### Photocarboxylation of substrate **1a** in the presence of $D_2O$ instead of $H_2O$

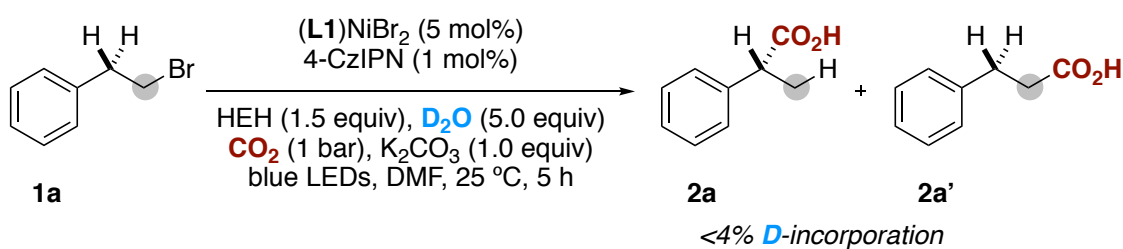

In order to elucidate whether the additive  $H_2O$  is able to scramble protons with the putative intermediates of the catalytic cycle, we performed the photocarboxylation reaction of substrate **1a** in the presence of  $D_2O$  instead of  $H_2O$ , according to **GP4**. The  $^1H$  NMR revealed no deuterium incorporation at  $\alpha$ - or  $\beta$ -positions of the acid **2a**. Furthermore, the high-resolution mass analysis of so-formed acid **2a** indicated that if any incorporation of deuterium from  $D_2O$  occurs during the process, it is very little amount ( $\sim 4\%$ ) (Table S4).

| Table S4: Isotopic pattern of the product <b>2a</b> |           |             |
|-----------------------------------------------------|-----------|-------------|
| Ion                                                 | M+H (150) | M+H+1 (151) |
| counts                                              | 11697     | 1652        |
| found abundance                                     | 100%      | 14.1%       |
| expected abundance                                  | 100%      | 10.0%       |

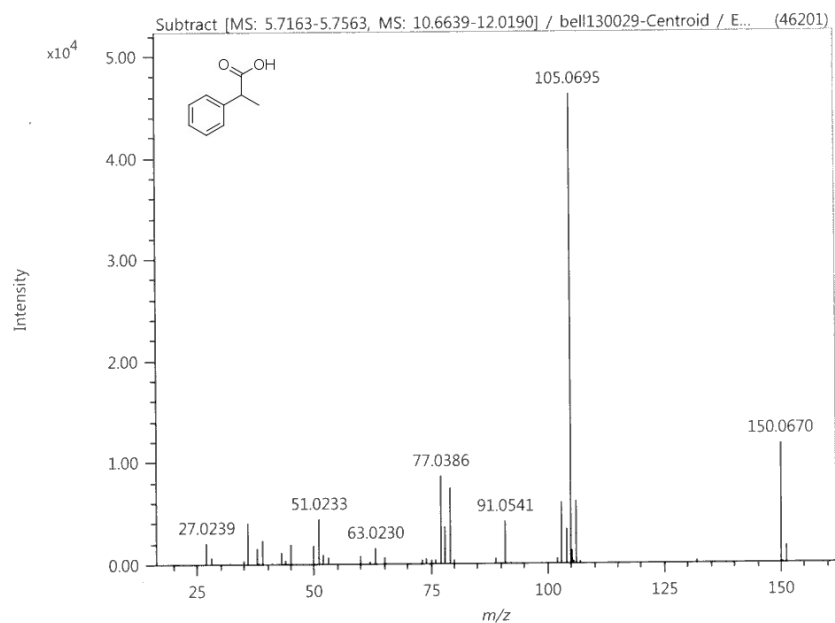

Figure S7: MS spectra of the product **2a** in the presence of D<sub>2</sub>O.

### 9.1.4 Radical inhibition experiment

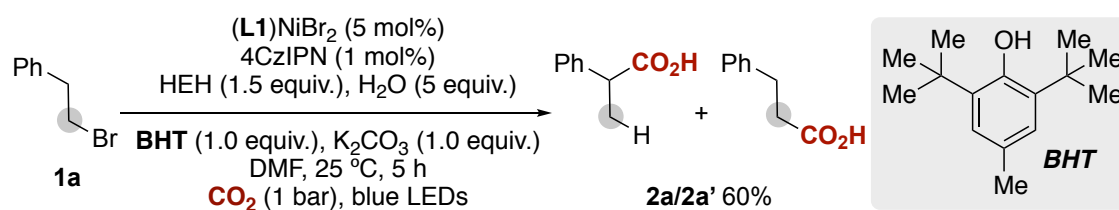

Following **GP4**, the photocarboxylation of substrate **1a** was performed in the presence of 1.0 equivalent of the radical scavenger BHT (dibutylhydroxytoluene). The product **2a/2a'** was obtained in 60% yield, thus suggesting no radical inhibition of the reaction.

### 9.1.5 Cyclic Voltammetric (CV) measurements of (L1)NiBr<sub>2</sub>

The reduction potentials of (L1)NiBr<sub>2</sub> were measured using cyclic voltammetry in MeCN (analytical grade), using ferrocene ( $E_{1/2}(\text{Fe}^+/\text{Fe}) = +0.380 \text{ V vs. SCE}$ )<sup>[47]</sup> as internal reference. The measurement was carried out using a Metrohm Autolab PGSTAT302N device using a glassy carbon working electrode, a platinum wire counter-electrode and a silver wire as pseudo-reference electrode. Tetrabutylammonium tetrafluoroborate (0.1 M, Fluka) was used as supporting electrolyte. Prior to the measurement, the solvent was degassed by purging with argon. All the measurements were performed under argon atmosphere.

The combined UV-vis and cyclic voltammetry experiments was carried out using a Metrohm Autolab PGSTAT302N device and an Agilent 8453 spectrometer, using an OTTLE (Optically Transparent Thin-Layer Electrochemical) cell from Frantisek Hartl (path length: 0.02 cm)<sup>[48]</sup> equipped with two platinum minigrids as working electrode and counter-electrode. A silver wire was used as pseudo-reference electrode. Tetrabutylammonium tetrafluoroborate (0.1 M, Fluka) was used as supporting electrolyte. Prior to the measurement the solvent was degassed by purging argon. All the measurements were performed under argon atmosphere.

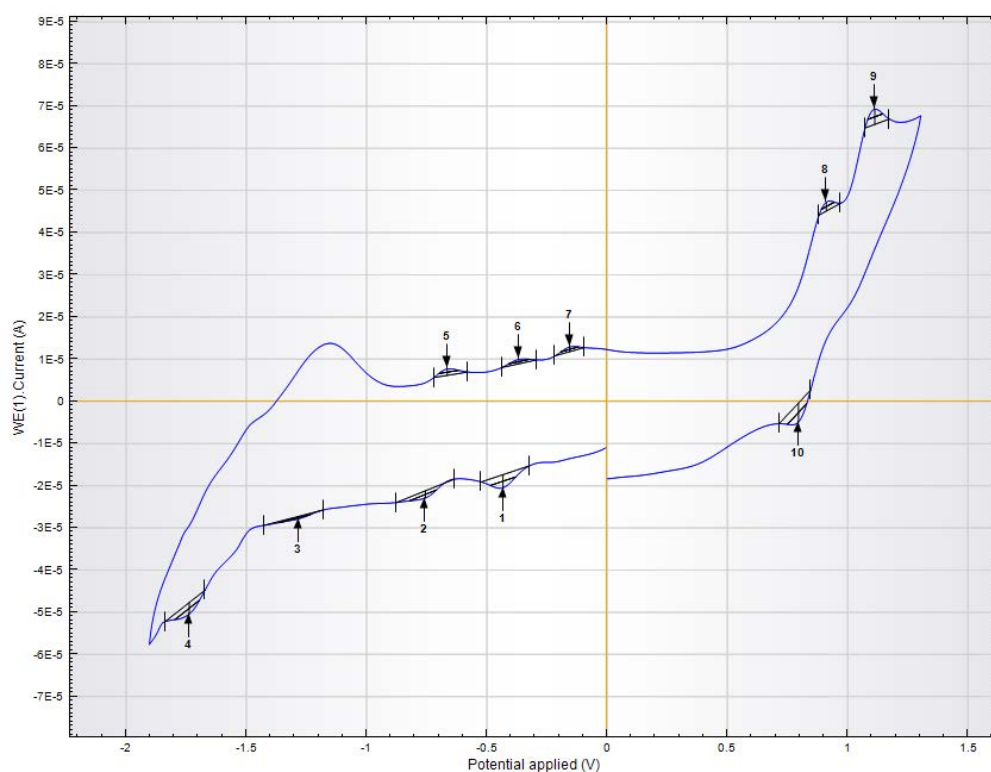

**Figure S8:** Cyclic Voltammetry of (L1)NiBr<sub>2</sub> in the presence of ferrocene (peak 8, 9).

Silver wire was used as pseudo-reference electrode.

| Index | Potential (V) | Index | Potential (V) |
|-------|---------------|-------|---------------|
| 1     | -0.43304      | 6     | -0.36758      |
| 2     | -0.75531      | 7     | -0.1561       |
| 3     | -1.284        | 8     | 0.91141       |
| 4     | -1.7372       | 9     | 1.1128        |
| 5     | -0.66467      | 10    | 0.79559       |

The following values were obtained from the cyclic voltammetry experiment:

$$E_{1/2}(\text{Ni}^{2+}/\text{Ni}^+) = -0.88 \text{ vs. SCE} \quad E_{1/2}(\text{Ni}^+/\text{Ni}^0) = -1.18 \text{ vs. SCE}$$

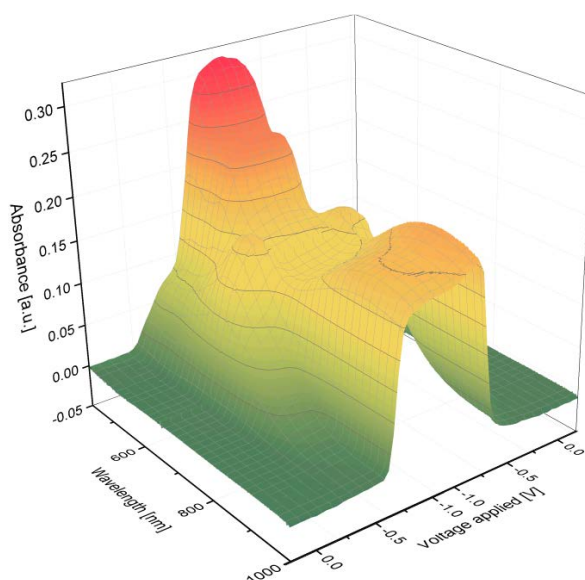

**Figure S9:** Combined cyclic voltammogram and UV-Vis spectra of (L1)NiBr<sub>2</sub>.

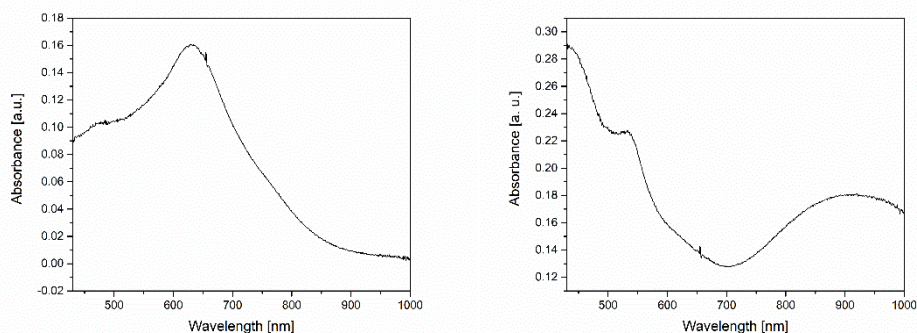

**Figure S10:** UV-Vis spectra of the Ni(I) species ( $\lambda_{\text{max}} = \sim 630$  nm) (left) and Ni(0) species ( $\lambda_{\text{max}} = \sim 900$  nm) (right) at variable potential applied. Silver wire was used as pseudo-reference electrode.

By combining cyclic voltammetry and UV-vis spectroscopy Figure S9, the UV-Vis spectra of the Ni(I) and Ni(0) species from the reduction of (L1)NiBr<sub>2</sub> precatalyst was obtained. As shown in Figure S10, the low-valent nickel species generated from the electrochemical reduction of (L1)NiBr<sub>2</sub> precatalyst show a very different UV-vis spectrum. The Ni(I) species is characterized by an intense absorption maximum at  $\sim 630$  nm, while the corresponding Ni(0) species has an absorption peak centered at  $\sim 900$  nm.

### 9.1.6 Time-resolved UV-Vis experiments

*Experimental set-up:* The UV-Vis measurement where performed using an Agilent 8453 spectrometer using a temperature-controlled (20.0 °C) fluorescence cuvette (1 cm optical pathway, both faces can transmit light) equipped with a bullet-shaped Teflon-coated stirring bar (length: 6 mm,  $\sim 250$  rpm). A single blue LED OSRAM Oslon<sup>®</sup> SSL 80 royal- blue LEDs ( $\lambda_{\text{max}} = 455$  nm ( $\pm 15$  nm), 3.5 V, 700 mA), equipped with a metallic passive cooling element, was placed approx. 5 mm away from one transmitting side of the cuvette, at 90° from the measuring beam. Unless otherwise stated, the spectra were recorded every second.

*Preparation of a stock-solution of (L1)NiBr<sub>2</sub> and 4-CzIPN. (Solution A):* In a vial equipped with a teflon-coated stirring bar, (L1)NiBr<sub>2</sub> ( $5 \cdot 10^{-3}$  M) and 4-CzIPN ( $10^{-3}$  M) were added, then the corresponding amount of DMF (Fischer scientific, analytical grade) was added and the solution was stirred for 5 minutes.

*Preparation of the solution of Hantzsch ester. (Solution B):* In a vial equipped with a teflon-coated stirring bar, Hantzsch ester (approx. 500 mg) was added to DMF (approx. 10 ml, Fischer scientific, analytical grade). The suspension was stirred for 30 minutes to obtain a saturated solution.

*Preparation of the solution C for UV-Vis spectroscopy:* In the fluorescence cuvette, solution A (300  $\mu$ l) followed by solution B (100  $\mu$ l) were added to DMF (2 ml). The mixture was degassed by bubbling argon using a needle for 100 seconds, then sealed using a PTFE stopper.

*Preparation of the solution D for UV-Vis spectroscopy:* In the fluorescence cuvette, solution A (300  $\mu$ l), solution B (100  $\mu$ l) and phenylethylbromide (**1a**) (30  $\mu$ l) were sequentially added to DMF (2 ml). The mixture was degassed by bubbling argon using a needle for 100 seconds, then sealed using a PTFE stopper.

#### UV-Vis analysis upon illumination of solution C

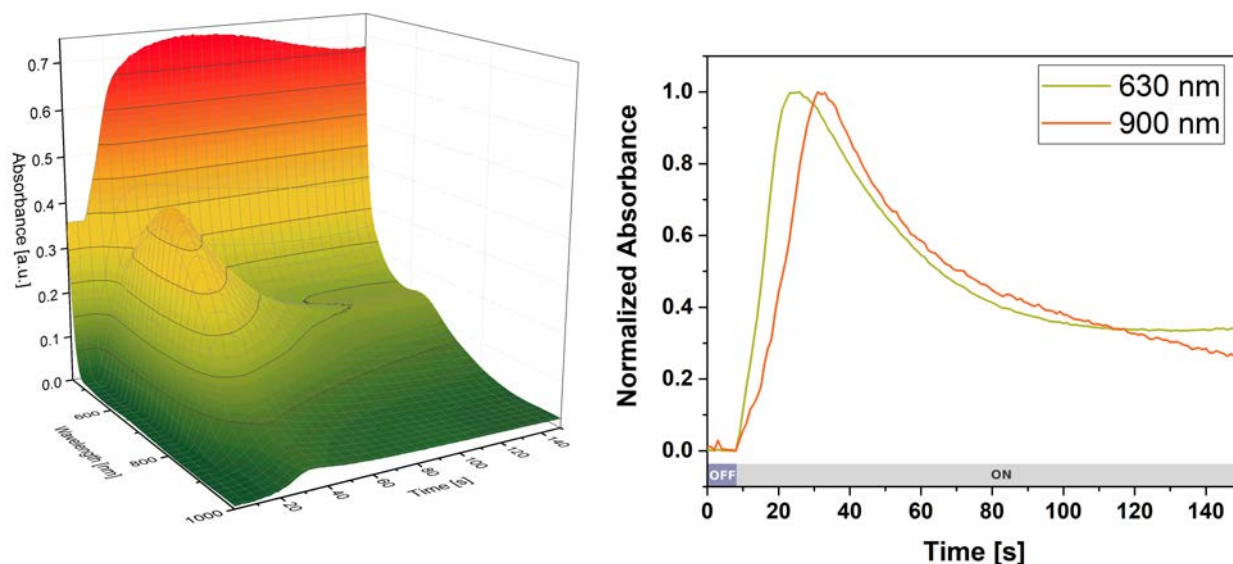

**Figure S11:** UV-Vis spectrum of solution C over time (left). Evolution of the absorption at 630 and 900 nm over time (normalized) (right).

Upon illuminating the solution, the fast formation of Ni(I) species ( $\sim$  630 nm) could be detected. The formation of Ni(0) species could also be seen at higher wavelengths ( $\sim$  900

nm). Despite the partial overlap with the Ni(I) absorption tail, it was possible to detect the presence of Ni(0) species by comparing the change of the intensity at 630 and 900 nm over time (Figure S11). Moreover, as exhibited in Figure S11, the build-up of Ni(0) species occurred later than the initial formation of Ni(I) species. After reaching a maximum, both species decrease, probably due to the competitive oxidative decomposition.

When the same experiment was repeated in the absence of either light, Hantzsch ester or 4-CzIPN, no reduction could be detected, thus confirming that all these components are necessary to form the catalytically competent species.

#### UV-Vis analysis upon illumination of solution D

Upon starting the illumination, the formation of the Ni(I) and Ni(0) species could be detected, while the intensity of the absorption maxima was strongly reduced (Figure S12). In addition, the kinetic profile appeared to be much slower than the case, where substrate **1a** is absent. This behavior is consistent with the fact that **1a** could react with the low-valent nickel species, as postulated by the proposed catalytic cycle.

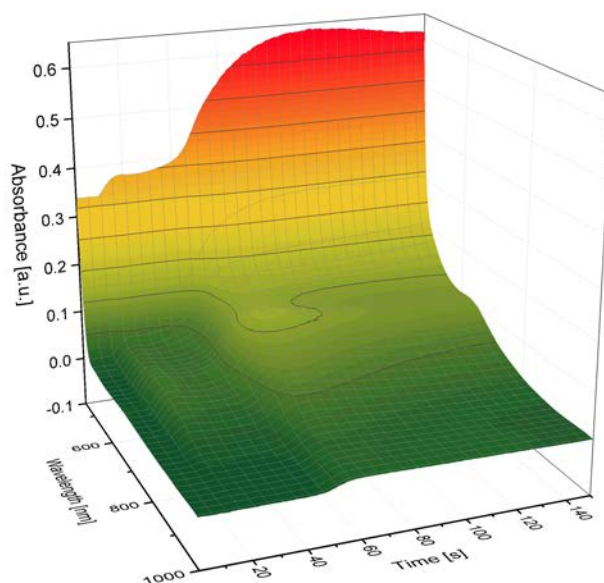

**Figure S12:** UV-Vis spectra of solution D over time.

#### UV-Vis analysis upon illumination of solution C, followed by the addition of **1a**.

During the first irradiation period, the UV-Vis pattern was consistent with the previous observation, while upon the addition of substrate **1a**, an extremely fast consumption of



both Ni(I) and Ni(0) species was observed. This behavior is consistent with the fact that substrate **1a** could react with the low-valent nickel species, as postulated by the proposed catalytic cycle (Figure S13).

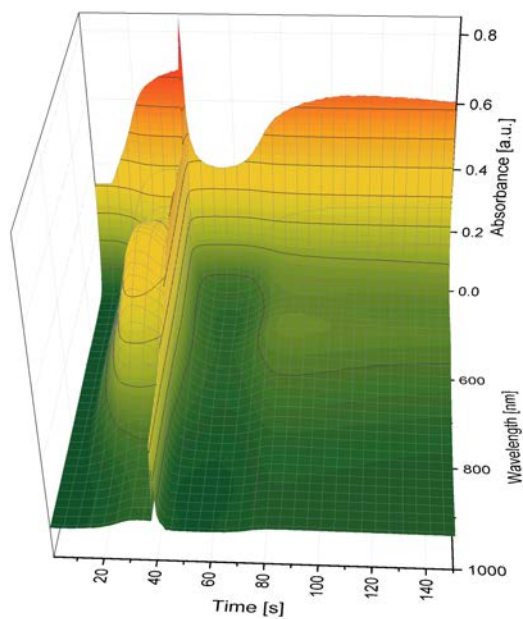

**Figure S13:** UV-Vis of solution C before and after the addition of substrate **1a**. The injection spike is clearly visible at  $t = \sim 40$  s.

## 9.2 Photocarboxylation of unactivated secondary alkyl bromides

### 9.2.1 Deuterium labelling experiment

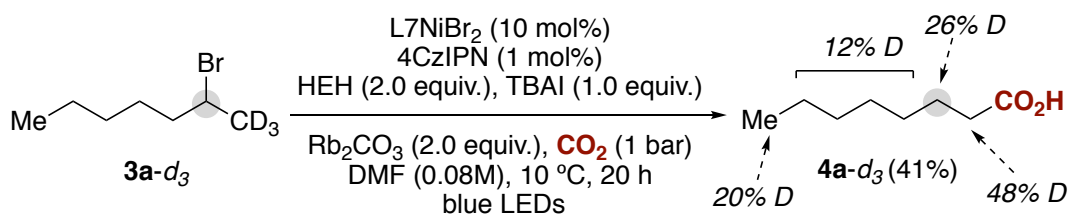

Following **GP5**, the photocarboxylation of deuterated 2-bromoheptane (**3a-d<sub>3</sub>**, 0.25 mmol) was performed. The desired product **4a-d<sub>3</sub>** (15 mg, 0.102 mmol, 41%) was obtained as colorless oil. The <sup>2</sup>H NMR spectra revealed the scrambling of deuterium isotope throughout the hydrocarbon chain via β-hydride elimination/reinsertion.

<sup>2</sup>H NMR (77 MHz, CHCl<sub>3</sub>): δ (ppm) = 2.32 (s, 0.96D), 1.62 (s, 0.52D), 1.15 (s, 0.92D), 0.86 (s, 0.61D).

Spectroscopic data for **4a-d<sub>3</sub>** match those previously reported in literature.<sup>[18]</sup>

#### KIE determination:

Following **GP5**, the photocarboxylation of substrate **3a** and **3a-d<sub>3</sub>** were performed (a set of four reactions for each substrate). The reactions for both **3a** and **3a-d<sub>3</sub>** were stopped after 30 min, 60 min, 90 min and 120 min. The reactions were quenched with 2M HCl and diluted with ethyl acetate. The anisole (1.0 equiv.) as internal standard was added to the solution and filtered through short pad of silica gel. The yield was determined by GC-FID analysis. The obtained yields in the form of concentration were plotted against time (Figure S14).

The determined KIE = (K<sub>H</sub>/K<sub>D</sub>) = 1.12 ± 0.01

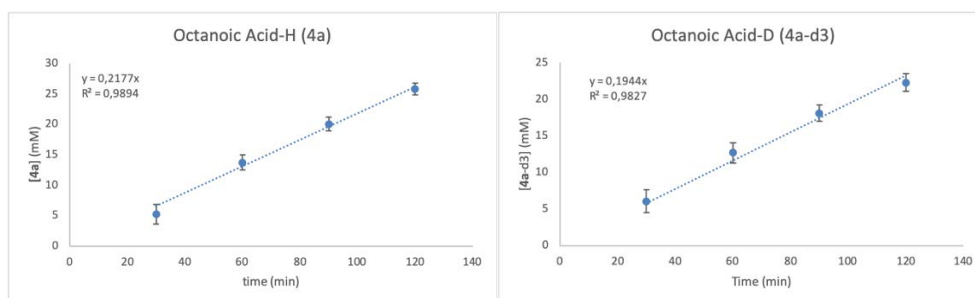

**Figure S14:** Determination of the initial rates of **4a** and **4a-d<sub>3</sub>** formation.

## 9.2.2 Radical inhibition experiment

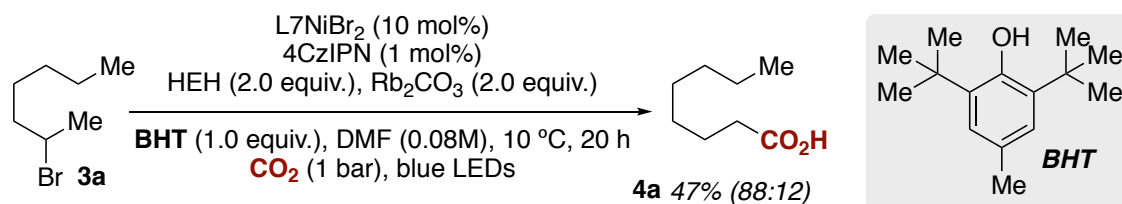

Following the general procedure **GP5**, the photocarboxylation of substrate **3a** was performed in the presence of 1.0 equivalent of the radical scavenger BHT (dibutylhydroxytoluene). The product **4a** was obtained in 47% yield, thus suggesting no radical inhibition of the reaction.

## 9.2.3 Cyclic Voltammetric (CV) measurements of (L7)NiBr<sub>2</sub>

The reduction potentials of (L7)NiBr<sub>2</sub> were measured using cyclic voltammetry in MeCN (analytical grade), using ferrocene ( $E_{1/2}(\text{Fe}^+/\text{Fe}) = +0.380 \text{ V vs. SCE}$ )<sup>[47]</sup> as internal reference. The measurement was carried out using a Metrohm Autolab PGSTAT302N device using a glassy carbon working electrode, a platinum wire counter-electrode and a silver wire as pseudo-reference electrode. Tetrabutylammonium tetrafluoroborate (0.1 M, Fluka) was used as supporting electrolyte. Prior the measurement the solvent was degassed by bubbling argon through a hypodermic needle. All the measurements were performed under argon atmosphere.

The combined UV-Vis and cyclic voltammetry experiments was carried out using a Metrohm Autolab PGSTAT302N device and an Agilent 8453 spectrometer, using an OTTLE (Optically Transparent Thin-Layer Electrochemical) cell from Frantisek Hartl (path length: 0.02 cm)<sup>[48]</sup> equipped with two platinum minigrids as working electrode and counter-electrode. A silver wire was used as pseudo-reference electrode. Tetrabutylammonium tetrafluoroborate (0.1 M, Fluka) was used as supporting electrolyte. Prior the measurement the solvent was degassed by bubbling argon through a hypodermic needle. All the measurements were performed under argon atmosphere.

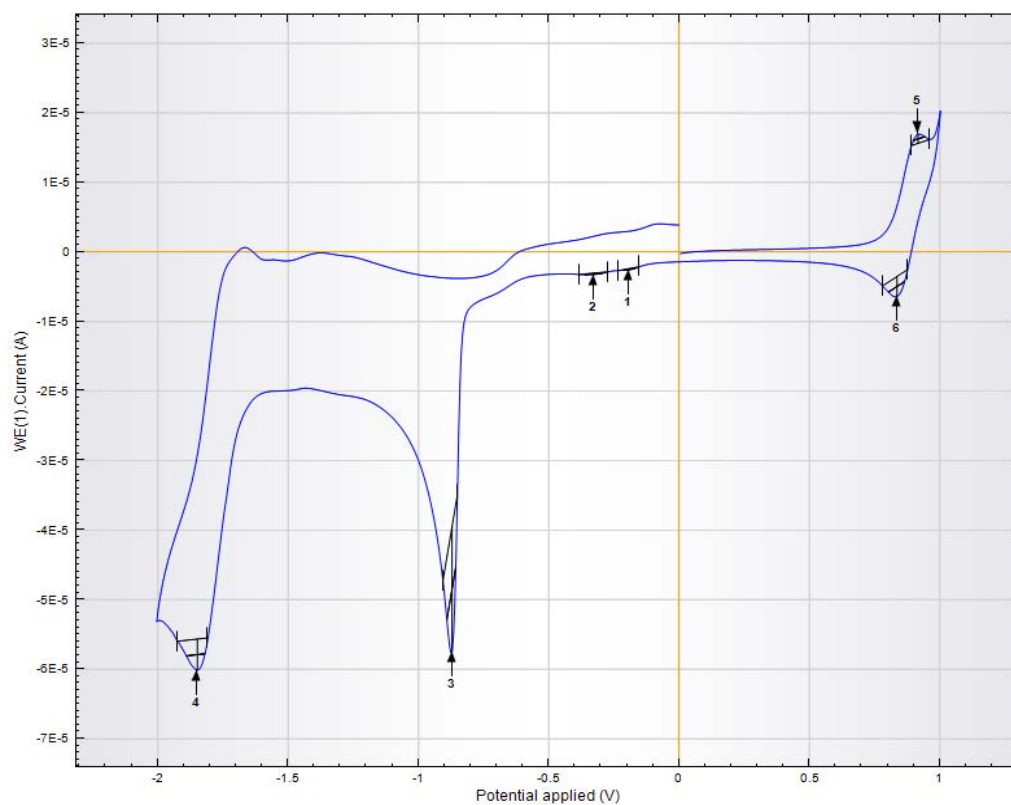

**Figure S15:** Cyclic Voltammetry of (L7)NiBr<sub>2</sub> in the presence of ferrocene (peak 5, 6). Silver wire was used as pseudo-reference electrode.

| Index | Potential (V) |
|-------|---------------|
| 1     | -0.19135      |
| 2     | -0.3273       |
| 3     | -0.87112      |
| 4     | -1.848        |
| 5     | +0.91644      |
| 6     | +0.83588      |

The following values were obtained from the cyclic voltammetry experiment:

$$E_{1/2} (\text{Ni}^{2+}/\text{Ni}^+) = -0.78 \text{ vs SCE}$$

$$E_{1/2} (\text{Ni}^+/\text{Ni}^0) = -1.33 \text{ vs SCE}$$

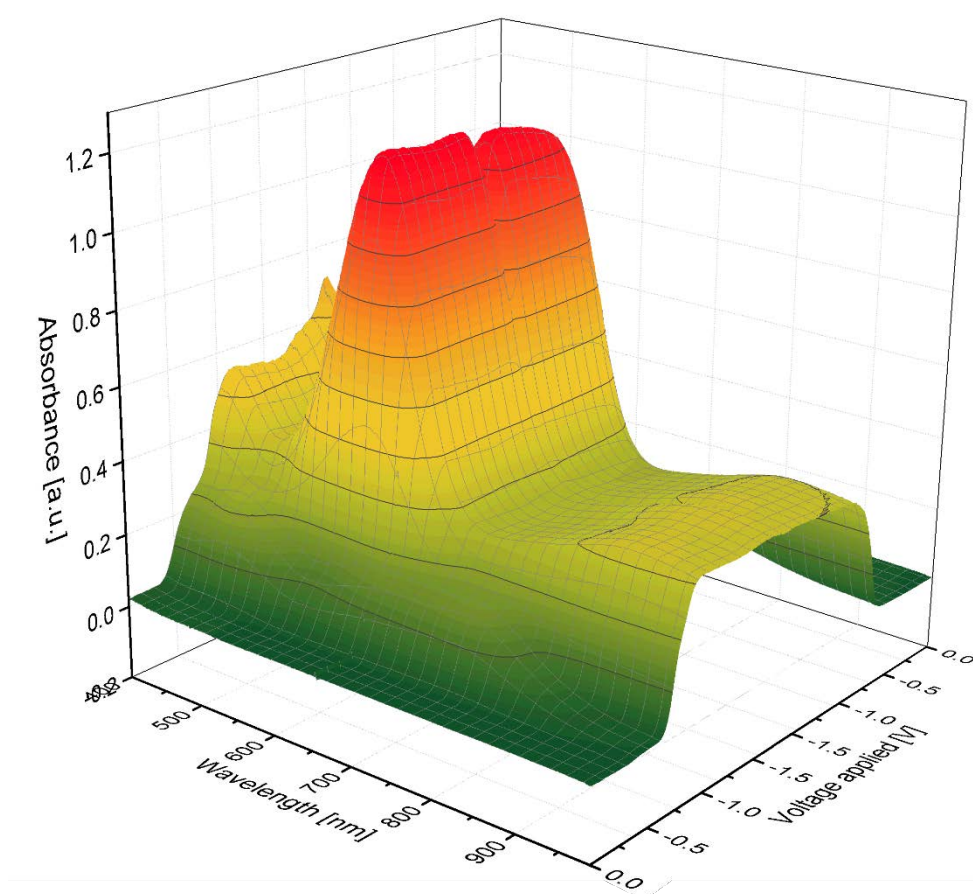

**Figure S16:** Combined cyclic voltammogram and UV-Vis spectra of (**L7**)NiBr<sub>2</sub>. Silver wire was used as pseudo-reference electrode.

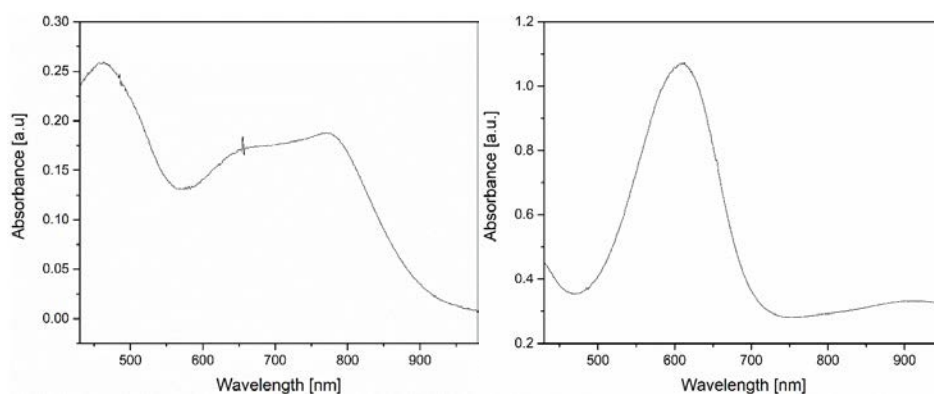

**Figure S17:** UV-Vis spectra of the Ni(I) species ( $\lambda_{\text{max}} = \sim 772$  nm) (left) and Ni(0) species ( $\lambda_{\text{max}} = \sim 910$  nm) (right) at variable potential applied. Silver wire was used as pseudo-reference electrode.

By combining cyclic voltammetry and UV-vis spectroscopy of Figure S16, the UV-Vis spectra of the Ni(I) and Ni(0) species from the reduction of (**L7**)NiBr<sub>2</sub> precatalyst was obtained. As shown in Figure S17, the low-valent nickel species generated from the electrochemical reduction of (**L7**)NiBr<sub>2</sub> precatalyst show a very different UV-vis

spectrum. The Ni(I) species is characterized by an intense absorption maximum at  $\sim 772$  nm, while the corresponding Ni(0) species has an absorption peak centered at  $\sim 910$  nm. The Ni(0) species has a more pronounced absorption around 600 nm, however in this region multiple species intensely absorb under working conditions. Hence, we decided to follow the peak with maximum at 910 nm as a fingerprint for the formation of the low-valent Ni(0) species.

#### 9.2.4 Time-resolved UV-Vis experiments

*Experimental set-up:* The UV-Vis measurement was performed using an Agilent 8453 spectrometer using a temperature-controlled ( $20.0$  °C) fluorescence cuvette (1 cm optical pathway, both faces can transmit light) equipped with a bullet-shaped Teflon-coated stirring bar (length: 6 mm,  $\sim 250$  rpm). A single blue LED OSRAM Oslon<sup>®</sup> SSL 80 royal-blue LEDs ( $\lambda_{\text{max}} = 455$  nm ( $\pm 15$  nm), 3.5 V, 700 mA), equipped with a metallic passive cooling element, was placed approx. 5 mm away from one transmitting side of the cuvette, at  $90^\circ$  from the measuring beam. Unless otherwise stated, the spectra were recorded every second.

*Preparation of a stock-solution of (L7)NiBr<sub>2</sub> and 4-CzIPN. (Solution A):* In a vial equipped with a teflon-coated stirring bar, (L7)NiBr<sub>2</sub> ( $5 \cdot 10^{-3}$  M) and 4-CzIPN ( $10^{-3}$  M) were added and then the corresponding amount of DMF was added and the solution was stirred for 5 min.

*Preparation of the solution of Hantzsch ester. (Solution B):* In a vial equipped with a teflon-coated stirring bar, Hantzsch ester (approx. 500 mg) was added to DMF (approx. 10 mL). The suspension was stirred for 30 minutes to obtain a saturated solution.

*Preparation of the solution C for UV-Vis spectroscopy:* In the fluorescence cuvette, solution A (500  $\mu$ l) followed by solution B (100  $\mu$ l) were added to DMF (1 ml). The mixture was degassed by bubbling argon using a needle for 100 seconds, then sealed using a PTFE stopper.

*Preparation of the solution D for UV-Vis spectroscopy:* In the fluorescence cuvette, solution A (500  $\mu$ l), solution B (100  $\mu$ l) and phenylethylbromide (**1a**) (30  $\mu$ l) were

sequentially added to DMF (1 ml). The mixture was degassed by bubbling argon using a needle for 100 seconds, then sealed using a PTFE stopper.

#### UV-Vis analysis upon illumination of solution C

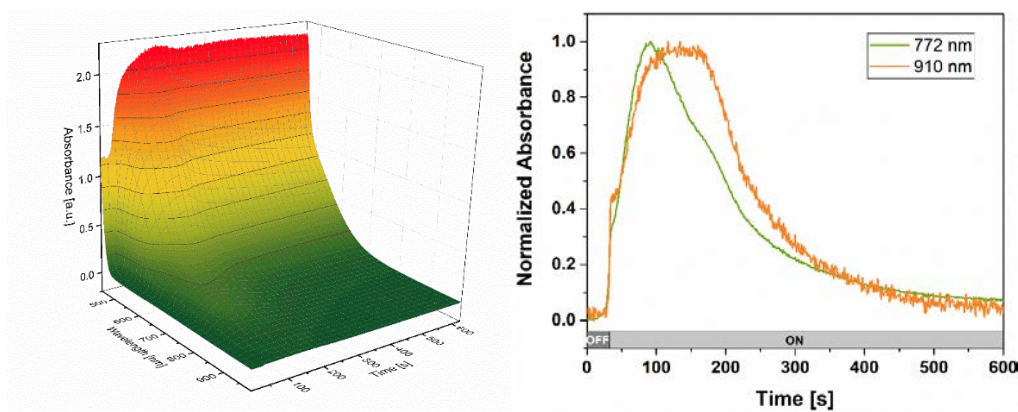

**Figure S18:** UV-Vis spectrum of solution C over time (left). Evolution of the absorption at 772 and 910 nm over time (normalized) (right).

Upon illuminating the solution, the fast formation of Ni(I) species ( $\sim 772$  nm) could be detected. The formation of Ni(0) species could also be seen at higher wavelengths ( $\sim 910$  nm). Despite the partial overlap with the Ni(I) absorption tail, it was possible to detect the presence of Ni(0) species by comparing the change of the intensity at 772 and 910 nm over time (Figure S18). Moreover, as shown in Figure S, the build-up of Ni(0) species occurred later than the initial formation of Ni(I) species. After reaching a maximum, both species decrease, probably due to the competitive oxidative decomposition.

When the same experiment was repeated in the absence of either light, Hantzsch ester or 4-CzIPN, no reduction could be detected, thus confirming that all these components are necessary to form the catalytically competent species.

#### UV-Vis analysis upon illumination of solution D

Upon starting the illumination, the formation of the Ni(I) and Ni(0) species could be detected and a negligible quenching of the intensity was observed (Figure S19). This behavior is consistent with the fact that **3a** most likely undergoes oxidative addition much slower than its counterpart **1a**, which benefits from the assistance of the aromatic ring.

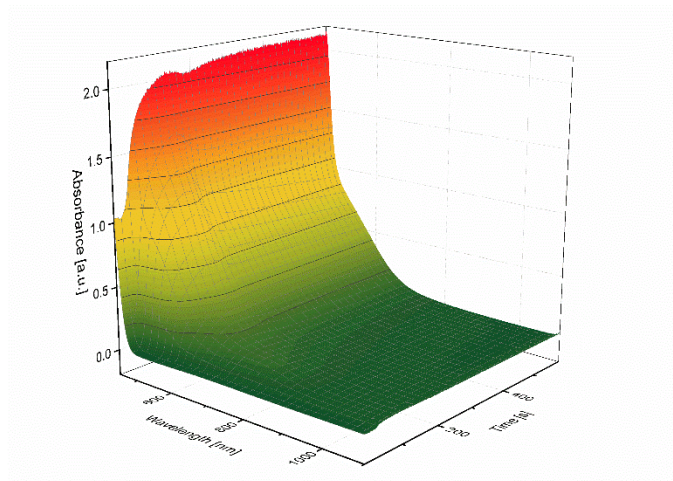

**Figure S19:** UV-vis spectra of solution D over time.

UV-Vis analysis upon illumination of solution C, followed by the addition of **3a**.

Both during the first irradiation period and after the addition of the alkyl bromide **3a**, the behavior of the system was consistent with the previous observations. This supports the fact that the oxidative addition of **3a** occurs at a relative low rate compared to the competitive oxidative pathways, therefore little quenching of the intensity could be observed. (Figure S20).

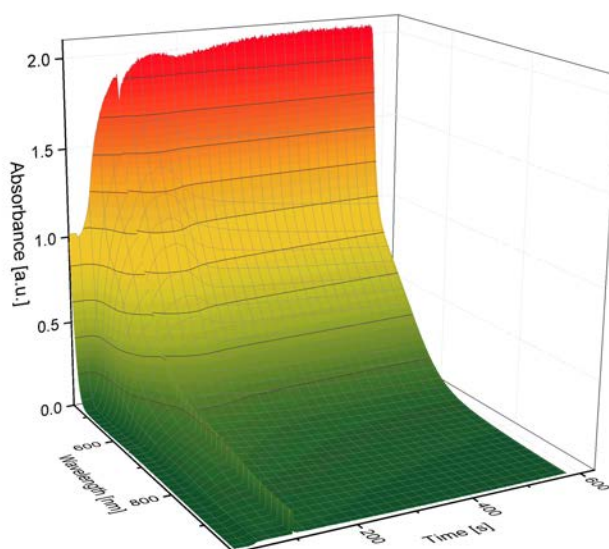

**Figure S20** UV-vis of solution C before and after addition of **3a**. The injection spike is clearly visible at  $t = \sim 100$  s.



### 9.3 DFT calculations

Calculations were performed using Gaussian 09, Revision E.01<sup>[49]</sup> at the Universität Regensburg HPC-cluster “Athene”. All the optimizations were performed using spin-unrestricted broken-symmetry DFT using U $\omega$ B97X-D/6-31g(d) in the gas phase at 298 K.<sup>[50]</sup> The identity of the stationary points was confirmed by frequency analysis: intermediates had zero imaginary frequency, while transition states had one imaginary frequency. The intermediates and the corresponding transition states were verified by the animation of the imaginary frequency; the thermochemistry was calculated at the same level of theory, summing the contribution of CO<sub>2</sub> when not explicitly present as reactant or carboxy compound.

The solvent corrections were taken into account via incorporation of the electronic energy obtained in *N,N*-DMF at 298 K using the SMD solvation model,<sup>[51]</sup> using U $\omega$ B97X-D/6-31g(d) and U $\omega$ B97X-D/def2-TZVP (the energies in the potential energy diagram diagrams are reported according to the latter level of theory).<sup>[52,53]</sup> The bromide loss from the oxidative insertion product was estimated considering the following reaction (Scheme S1):

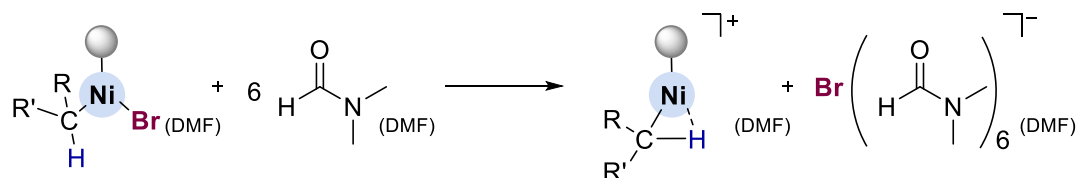

*Scheme S1* Reaction used for solvent correction purposes.

To have a better precision in our analysis, all the molecules in this transformation were optimized in solvent at the SMD(DMF)-BS-U $\omega$ B97X-D/6-31g(d).

All the distances and coordinates are given in Ångstrom (Å), energies are given in Hartree (1 Ha = 627.509474 kcal·mol<sup>-1</sup>). Rendered structures were obtained using CYLview 1.0b<sup>[54]</sup> and ChemCraft 1.8.<sup>[55]</sup> The following color-code was used in visual representations: carbon = gray, nitrogen = blue, hydrogen = white, nickel = green, oxygen = red, bromide = dark red, potassium = purple.

### 9.3.1 Calculated intermediates and transition states for (L7)NiBr<sub>2</sub>

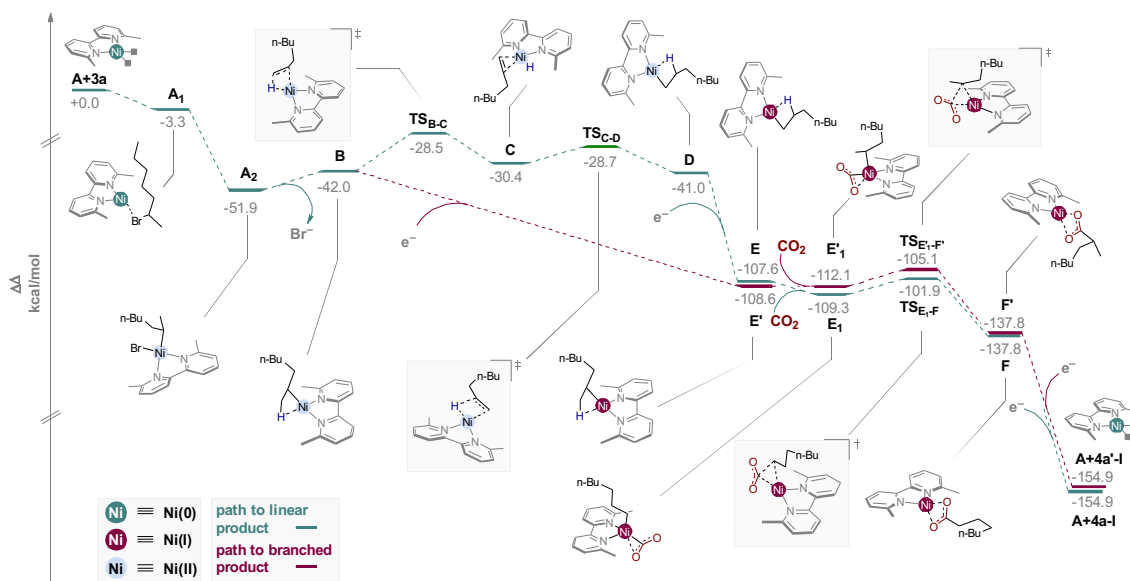

**Scheme S2** Proposed mechanism for the  $sp^3$  C-H carboxylation of unactivated alkyl halides at the SMD(DMF)-BS-UwB97X-D/def2-TZVP//BS-UwB97X-D/6-31G(d) level of theory.

The DFT-calculated catalytic cycle (Scheme S2) starts from the coordinatively unsaturated Ni(0)/L7 species **A**, which is used together with the model substrate **3a** as the energetic reference. This species can coordinate the substrate **3a** *via* the initial interaction of the metal center with the bromine atom, to give the associated complex **A**<sub>1</sub>. The oxidative addition to form the Ni(II) complex **A**<sub>2</sub> is thermodynamically favorable ( $\Delta G_{A_1-A_2} \approx -52 \text{ kcal}\cdot\text{mol}^{-1}$ ) and could be followed by bromide de-coordination towards **B**, stabilized by agostic interaction. The first isomerization step occurs *via* a  $\beta$ -hydride elimination ( $\Delta G_{B-C}^\ddagger \approx 13.5 \text{ kcal}\cdot\text{mol}^{-1}$ ) and provides the alkenyl-Ni(II) complex **C**, which re-inserts through an almost barrierless process ( $\Delta G_{C-D}^\ddagger \approx 2 \text{ kcal}\cdot\text{mol}^{-1}$ ). By comparing intermediates **B** and **D**, a slight destabilization of the terminal Ni(II) complex **D** compared to the branched Ni(II) homologue **B**, could be observed ( $\Delta G_{B-D} \approx +1 \text{ kcal}\cdot\text{mol}^{-1}$ ). Indeed, such small energetic difference allegedly causes the system to be in equilibrium between complexes **B**, **C** and **D**. Interestingly, while the effect of TBAI could not be included explicitly on the calculation, its contribution to increase the selectivity of carboxylation reactions is known from previous literature (see Ref. 3c in the main text). In both cases, the SET from the reduced photocatalyst 4-CzIPN<sup>•-</sup> likely forms the corresponding alkyl-

Ni(I) complex **E**. While the energetic barrier of the electron-transfer process cannot be computed, we can expect this process to be the product-determining step of the catalytic cycle (*see mechanistic evidences and explanation later in the paragraph*). The intermediate **E** coordinates CO<sub>2</sub> via an  $\eta^2$ (C-O) coordination followed by the migratory insertion step (**TS<sub>E1-F</sub>**). The carboxylate-Ni(I) complex **F** can liberate the conjugate base of product **4a** (**4a-I**) by a single-electron reduction sequence and forms the catalytically competent species **A**. The same considerations can be derived for the branched product obtained by direct reduction of intermediate **B** to **E'**, that ultimately leads to the byproduct **4a'-I**. It is interesting to notice that the highest barrier in the process is represented by **TS<sub>B-C</sub>**. The absence of a Kinetic Isotope Effect (*see the previous section on the Mechanistic Investigation*) advocates for a rate determining step which occurs after the chain-walking process. As already mentioned, the SET from the Ni(II) (**D/D'**) to the Ni(I) species **E/E'** is most likely dictating the observed selectivity.

### 9.3.2 Calculated intermediates and transition states for (L1)NiBr<sub>2</sub>

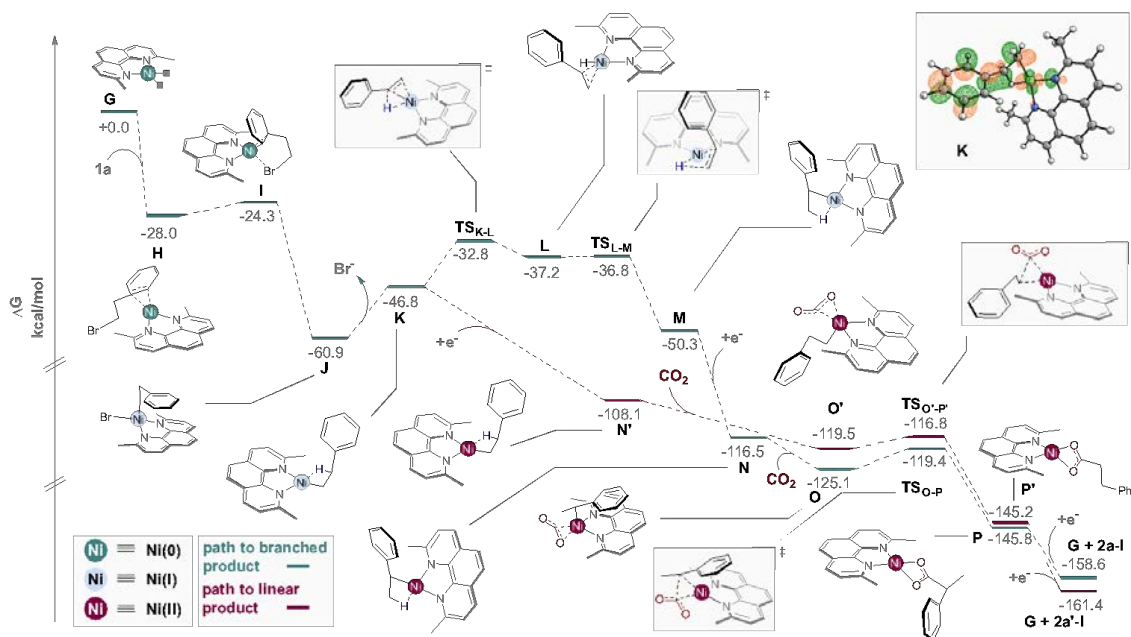

**Scheme S3** Proposed mechanism for the  $sp^3$  C-H carboxylation of homobenzylic alkyl halides at the SMD(DMF)-BS-UwB97X-D/def2-TZVP//BS-UwB97X-D/6-31G(d) level of theory. In the box, the filled orbital that is involved in the agostic interaction is reported.

The DFT-calculated catalytic cycle (Scheme S3) starts from the coordinatively unsaturated Ni(0) species **G**, which is used as the energetic reference. This species can coordinate the substrate **1a** via the  $\pi$ -system, in particular via an  $\eta^2$  interaction to give **H**. The subsequent interaction of the Ni-center with the bromide could be established at a small energetic expense ( $\Delta G_{H-I} = 4.3 \text{ kcal}\cdot\text{mol}^{-1}$ ), forming a distorted tetrahedral **I** complex, which undergoes oxidative addition to **J**. Notably, the intermediate **J** was found to be stabilized by an additional shifted face-to-face  $\pi$ - $\pi$  interaction between the substrate and the neocuproine ligand. The aforementioned labile ligand could be extruded to give the distorted square-planar **K**, in which an agostic interaction could be observed (*see molecular orbitals in picture*). Notably, the interaction weakens the C-H bond, thus permitting the facile  $\beta$ -H elimination through **TS<sub>K-L</sub>** ( $\Delta G^\ddagger \approx 14 \text{ kcal}\cdot\text{mol}^{-1}$ ). The intermediate complex **L** could undergo a barrierless migratory insertion through **TS<sub>L-M</sub>** to form **M**, which was also found to be stabilized by a  $\beta$ -agostic interaction. Both the branched **M** and linear **K** Ni(II) complexes can be reduced to give **N** and **N'**, respectively. They both retain the  $\beta$ -agostic interactions, but the former is approximately  $8 \text{ kcal}\cdot\text{mol}^{-1}$  lower in energy. Both complexes can coordinate CO<sub>2</sub> in an  $\eta^2(\text{C},\text{O})$  fashion: in the case of **O** (branched complex) an additional shifted face-to-face  $\pi$ - $\pi$  interaction was observed,

while absent in **O'**. The two Ni(I)-alkyl complexes undergo the migratory insertion (**TS<sub>O-P</sub>**, **TS<sub>O'-P'</sub>**), which was relatively low in activation barrier ( $\Delta G^\ddagger \approx 3$  and  $6 \text{ kcal}\cdot\text{mol}^{-1}$ , respectively) to yield the Ni(I)-carboxylate complexes **P** and **P'**. A second SET regenerates the catalytically-active Ni(0) complex **G** and liberates the product **2a-I** (and **2a'-I** from **G'**). Another hint regarding the mechanism is represented by the different product distribution obtained with the deuterated compounds. In the case of the *d*-labelled reagent, **TS<sub>K-L</sub>** would rise due to the presence of the heavier isotope. Even though this transformation does not become the rate-determining one, the diminished selectivity towards the benzylic product can be explained by considering that the equilibrium between **K** and **M** is influenced by the variation of the kinetic barriers. With the *d*-labelled compound, a greater amount of **K** will be present in solution, if compared to the corresponding protium-substituted reagent. Hence, the reduction from **K** to **N'** that forms ultimately **2a'-I** is more likely to occur with the deuterated **1a**.

In this case, the **K-M** equilibrium responsible for the selectivity of the reaction is pushed towards the population of **M** not only by kinetic effects but also by thermodynamics.

### 9.3.3 Uncatalyzed chain-walking of the homobenzylic radical

As the isomerization of the homobenzylic radical **Q**, which could be generated under light-irradiation, to the benzyl radical **R** could not be excluded *a priori*, we decided to evaluate the potential isomerization pathway towards the more stable **R** in the absence of nickel catalyst (Scheme S4).

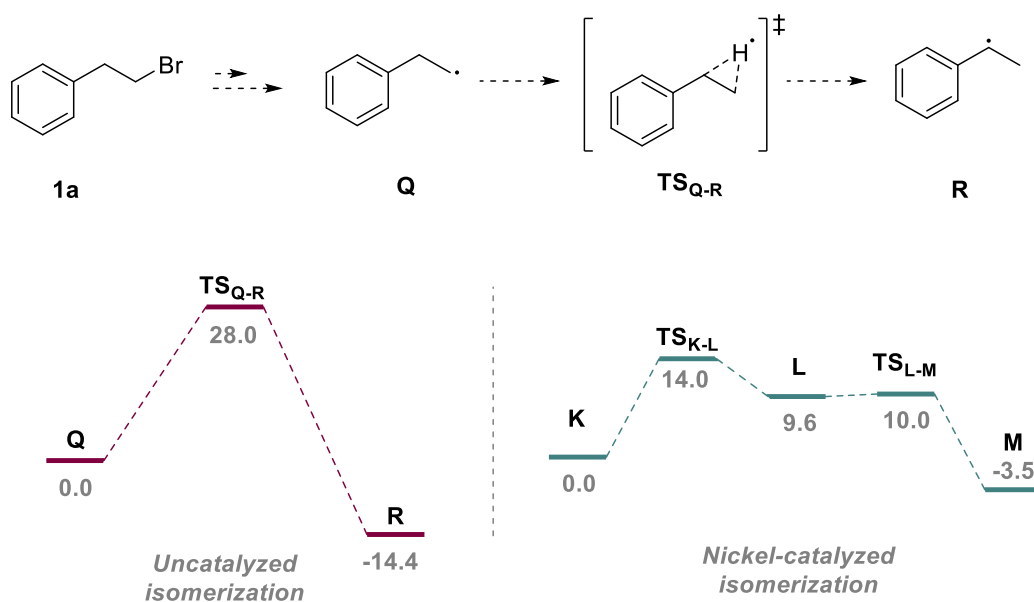

**Scheme S4** Upper: plausible isomerization mechanism in the absence of nickel catalysis calculated at the at the SMD(DMF)-BS-UwB97X-D/def2-TZVP//BS-UwB97X-D/6-31G(d) level of theory; lower: comparison of the uncatalyzed and nickel-catalyzed energetic profile (left: compound **Q** was set as reference; right: intermediate **K** was set as reference).

The calculated three-centered transition state **TS<sub>Q-R</sub>** proved to be too high in energy to be overcome at ordinary temperatures ( $\Delta G^\ddagger = 28.0 \text{ kcal}\cdot\text{mol}^{-1}$ ), thus corroborating the hypothesis that the nickel catalyst is required to allow the chain-migration process to occur (lower right). As already reported in (Scheme S4), the uncatalyzed energy barrier is replaced by two accessible transition states, which correspond to the  $\beta$ -H elimination (**TS<sub>K-L</sub>**) and the migratory insertion process (**TS<sub>L-M</sub>**).

### 9.3.4 Cartesian coordinates

#### 2h+K<sup>+</sup>+CO<sub>2</sub>

|    |               |               |               |
|----|---------------|---------------|---------------|
| C  | 2.0186546191  | -2.4530405195 | -1.5452338193 |
| C  | 2.9406646866  | -1.4383192442 | -1.4386727498 |
| C  | 2.5102109263  | -0.1328723315 | -1.1301973309 |
| C  | 1.1317152862  | 0.0485790695  | -0.9414789975 |
| C  | 0.6518057908  | -2.1862127017 | -1.3293504492 |
| C  | 3.3908525494  | 0.9929066184  | -0.9980399069 |
| C  | 0.6091280621  | 1.3537962456  | -0.6337096393 |
| C  | 1.4946022167  | 2.4356024491  | -0.5139530555 |
| C  | 2.9028117925  | 2.2223311549  | -0.6991366763 |
| C  | 0.9262647087  | 3.6892917476  | -0.2168062001 |
| H  | 1.5654711765  | 4.5605793556  | -0.1050683267 |
| C  | -0.4356714586 | 3.7953846372  | -0.0823171034 |
| C  | -1.2604113274 | 2.6584307796  | -0.2296143898 |
| H  | 4.456443653   | 0.839290975   | -1.1404680053 |
| H  | 2.3301791208  | -3.4631622604 | -1.7875572765 |
| H  | 3.9980325505  | -1.6342063239 | -1.5935885609 |
| H  | 3.5708244077  | 3.072561563   | -0.5978436208 |
| H  | -0.8961195421 | 4.7525392487  | 0.1360714188  |
| N  | -0.7340193834 | 1.4631536391  | -0.4835050396 |
| N  | 0.2390118644  | -0.961613344  | -1.0271489618 |
| C  | -2.7507816904 | 2.7717464167  | -0.1267435835 |
| H  | -3.2119502971 | 2.5046154462  | -1.0823569373 |
| H  | -3.1301878501 | 2.0837604904  | 0.636006014   |
| H  | -3.0467127901 | 3.7901997217  | 0.1366767363  |
| C  | -0.400547436  | -3.2523355683 | -1.4030926572 |
| H  | -0.7930137625 | -3.4585157066 | -0.4007603019 |
| H  | -1.2365391721 | -2.9127846111 | -2.0229430117 |
| H  | -0.0056462416 | -4.1828020654 | -1.8169877129 |
| Ni | -1.6344364402 | -0.4161818147 | -0.4614545394 |
| C  | -0.182418112  | -0.7050373516 | 2.034452063   |
| H  | 0.6162726427  | -1.2493921802 | 1.5167164491  |
| H  | -0.1653450343 | -1.0166202725 | 3.0872338077  |
| C  | -1.5655209478 | -0.9653790744 | 1.4234788742  |
| H  | -1.6895978765 | -2.0599162413 | 1.3483812586  |
| H  | 0.0865365581  | 0.3590348577  | 2.0192227332  |
| C  | -2.6768453851 | -0.449947537  | 2.2813171463  |
| C  | -3.7855892434 | -1.2458086164 | 2.5891840057  |
| C  | -2.7171047512 | 0.8709821535  | 2.7525101459  |
| C  | -4.9088944449 | -0.741957728  | 3.2309725627  |
| H  | -3.7809791572 | -2.2923961409 | 2.2815442703  |
| C  | -3.8399301468 | 1.4114479552  | 3.3659605848  |
| H  | -1.8523786402 | 1.5168965318  | 2.5905809924  |
| C  | -5.0429158927 | 0.6521293664  | 3.5442000341  |
| H  | -5.7594380962 | -1.3894438135 | 3.4437167542  |
| H  | -3.8527313631 | 2.4553471628  | 3.6741370783  |
| O  | -4.5684941431 | -0.0184362072 | -0.529023223  |
| C  | -3.431213934  | -0.2327504217 | -0.9108359911 |
| O  | -2.8765644862 | -0.4050048258 | -2.0324671236 |
| O  | -6.1798620417 | 1.1893472709  | 3.7909621571  |
| K  | -6.3098688337 | 0.8401415949  | 1.1772845847  |

Energy = -3331.4570448  
Zero-point correction = 0.385837 (Hartree/Particle)  
Thermal correction to Gibbs Free Energy = 0.326653  
Sum of electronic and zero-point Energies = -3331.071207  
Sum of electronic and thermal Energies = -3331.043805  
Sum of electronic and thermal Enthalpies = -3331.042861  
Sum of electronic and thermal Free Energies = -3331.130392  
G + ZVPE = -3330.744555  
Energy (DMF-6-31G(d)) = -3331.5059117  
Energy (DMF-def2-TZVP) = -3332.1924095

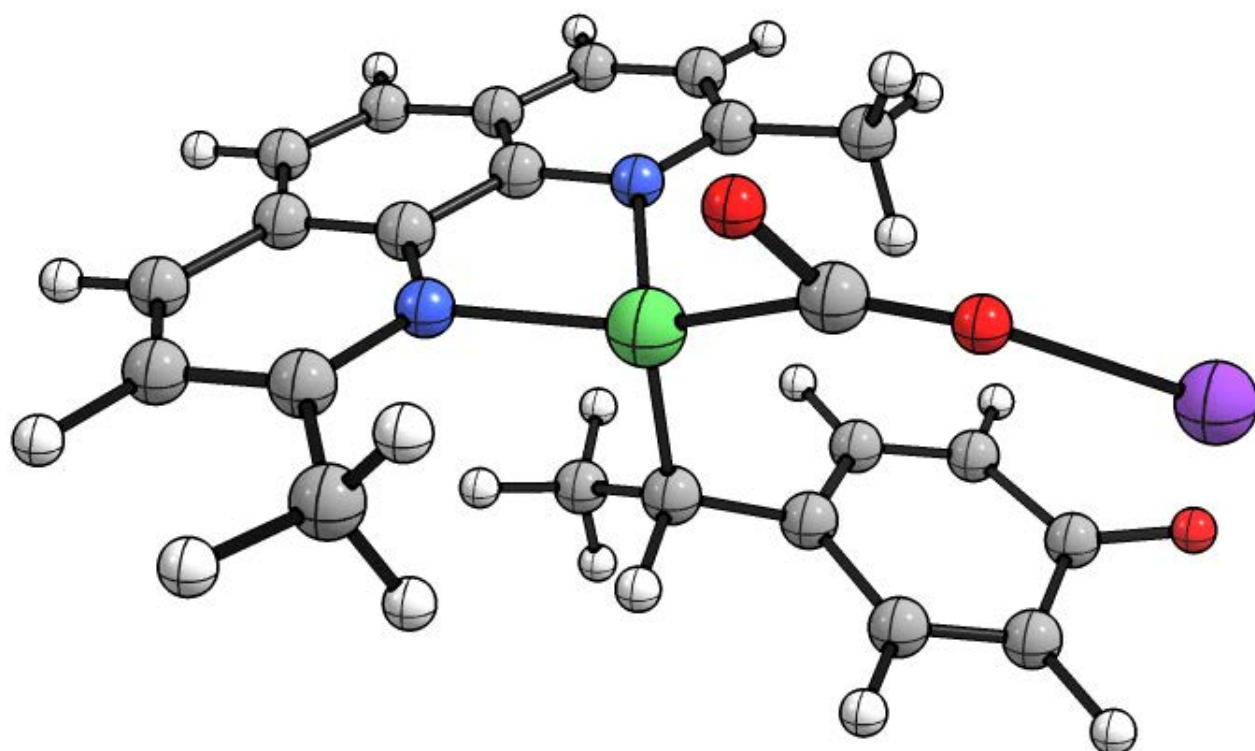



## CO<sub>2</sub>

|   |               |               |              |
|---|---------------|---------------|--------------|
| O | -1.58621682   | -2.1508762491 | 2.6113247187 |
| C | -2.1509774894 | -1.1374455653 | 2.5172885003 |
| O | -2.7155314607 | -0.1239134156 | 2.422909681  |

Energy = -188.520006

Zero-point correction = 0.010343 (Hartree/Particle)

Thermal correction to Gibbs Free Energy = -0.005710

Sum of electronic and zero-point Energies = -188.509663

Sum of electronic and thermal Energies = -188.506689

Sum of electronic and thermal Enthalpies = -188.505745

Sum of electronic and thermal Free Energies = -188.525716

G + ZVPE = -188.515373

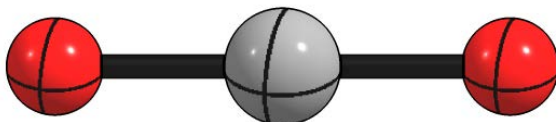

3a

|    |               |               |               |
|----|---------------|---------------|---------------|
| C  | -3.3529209603 | 0.2084108014  | 0.0488263175  |
| H  | -3.1015281159 | 0.916899738   | 0.8415089036  |
| Br | -2.2064305891 | 0.7843700565  | -1.459596376  |
| C  | -4.8067928062 | 0.3573291748  | -0.3670118657 |
| H  | -5.4549502815 | 0.098045645   | 0.4789263172  |
| H  | -5.0307842982 | 1.3824014515  | -0.6721729763 |
| H  | -5.0432623961 | -0.311294105  | -1.2004224204 |
| C  | -2.9879451605 | -1.2104496651 | 0.4667688806  |
| H  | -3.7116830694 | -1.5064029495 | 1.240928998   |
| H  | -3.1463723982 | -1.8847304721 | -0.384762664  |
| C  | -1.5719424634 | -1.3766091798 | 1.0139536983  |
| H  | -0.8504316267 | -1.072946047  | 0.2460984156  |
| H  | -1.4291802022 | -0.6934518681 | 1.8633697276  |
| C  | -1.2750217802 | -2.8082552599 | 1.4586528367  |
| H  | -2.0003547595 | -3.113909408  | 2.2265454916  |
| H  | -1.4221576366 | -3.489777073  | 0.6087802447  |
| C  | 0.1424421941  | -2.9820875937 | 2.0044333332  |
| H  | 0.8641980584  | -2.6732236317 | 1.236889141   |
| H  | 0.2883080275  | -2.3022373776 | 2.8544746692  |
| C  | 0.439824339   | -4.4158870883 | 2.4393907021  |
| H  | 0.3269053537  | -5.1118990086 | 1.6001784011  |
| H  | 1.4614639631  | -4.5143737137 | 2.8204847176  |
| H  | -0.2466653916 | -4.7368904262 | 3.2314585065  |

Energy = -2847.4525701

Zero-point correction = 0.211350 (Hartree/Particle)

Thermal correction to Gibbs Free Energy = 0.173812

Sum of electronic and zero-point Energies = -2847.241220

Sum of electronic and thermal Energies = -2847.230623

Sum of electronic and thermal Enthalpies = -2847.229679

Sum of electronic and thermal Free Energies = -2847.278758

G + ZVPE = -2847.067408

Energy (DMF-6-31G(d)) = -2847.4614837

Energy (DMF-def2-TZVP) = -2850.0430538

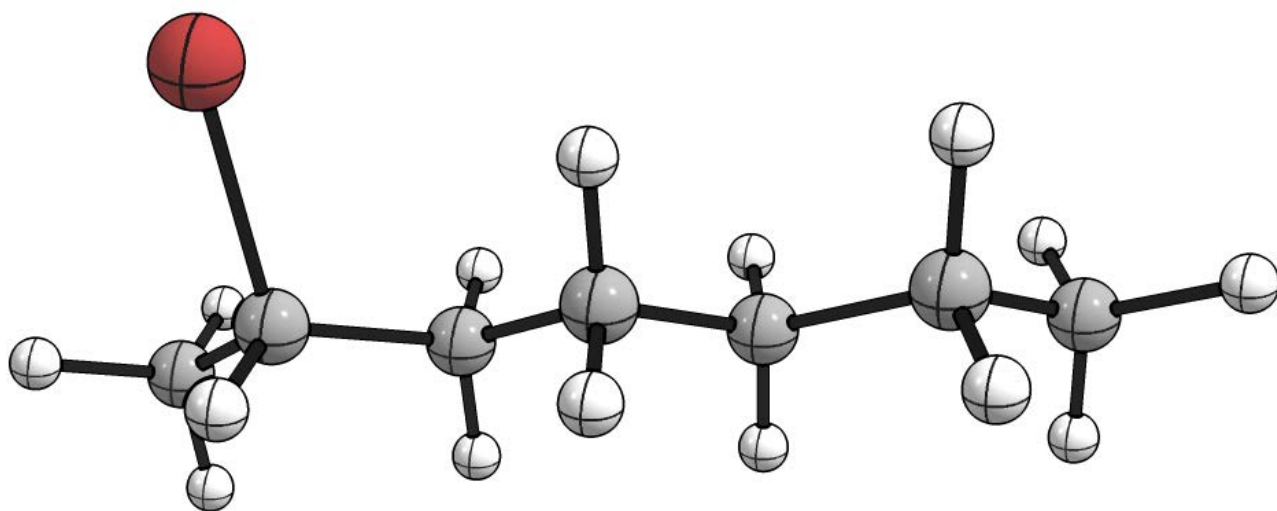

**4a-I**

|   |               |               |               |
|---|---------------|---------------|---------------|
| O | -3.7032534258 | -0.7288604786 | 0.8203694526  |
| C | -3.2831455379 | 0.2920635228  | 0.2271139654  |
| C | -1.018104015  | -0.9684055361 | 0.0657253105  |
| H | -1.4834861308 | -1.5570509538 | 0.8631809601  |
| H | -1.2424299201 | -1.5013010427 | -0.8707979022 |
| C | -1.7191189904 | 0.3867934217  | 0.0622375398  |
| H | -1.3383305612 | 0.98884149    | 0.9044656752  |
| H | -1.5033390817 | 0.9613955752  | -0.8468671554 |
| C | 0.5009479975  | -0.9103502976 | 0.2561781885  |
| H | 0.716332541   | -0.4199466514 | 1.2168984936  |
| H | 0.9116826275  | -1.9306045408 | 0.3307036002  |
| C | 1.2340234189  | -0.1733363141 | -0.8682048118 |
| H | 0.9106353616  | 0.8756743187  | -0.8843314432 |
| H | 0.9183509179  | -0.601676006  | -1.8299835157 |
| C | 2.7624701834  | -0.2302144578 | -0.7792030644 |
| H | 3.0905609996  | -1.2808630977 | -0.7823961006 |
| H | 3.1967409392  | 0.2288927434  | -1.6799224414 |
| C | 3.3448130746  | 0.4679821658  | 0.4519106592  |
| H | 2.9874963904  | -0.0298795634 | 1.3610341425  |
| H | 2.9599598233  | 1.4958260017  | 0.4948837239  |
| C | 4.8728356281  | 0.4906728952  | 0.4528320996  |
| H | 5.2579659006  | 1.0189445831  | -0.4281106779 |
| H | 5.2705447174  | 0.990995981   | 1.3432924473  |
| H | 5.2806157051  | -0.5274203332 | 0.4303449265  |
| O | -3.9168955632 | 1.2684135744  | -0.2278630723 |

Energy = -464.2475363

Zero-point correction = 0.222887 (Hartree/Particle)

Thermal correction to Gibbs Free Energy = 0.182946

Sum of electronic and zero-point Energies = -464.024649

Sum of electronic and thermal Energies = -464.012792

Sum of electronic and thermal Enthalpies = -464.011848

Sum of electronic and thermal Free Energies = -464.064590

G + ZVPE = -463.841703

Energy (DMF-6-31G(d)) = -464.3391565

Energy (DMF-def2-TZVP) = -464.5317523

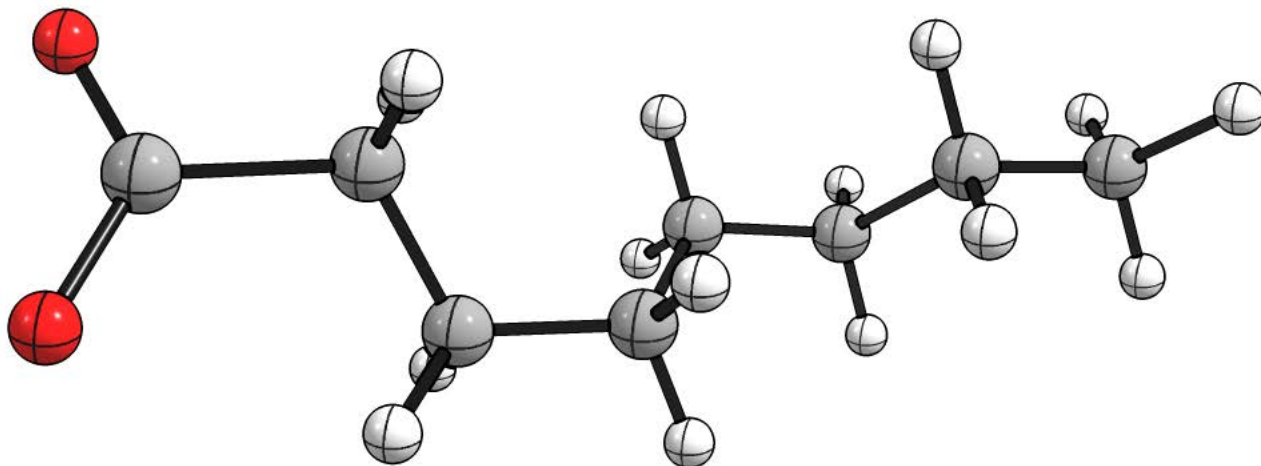

**4a'-I**

|   |               |               |               |
|---|---------------|---------------|---------------|
| O | -2.2909724129 | 1.2236929224  | -1.4159472606 |
| C | -1.9562339884 | 0.7738027035  | -0.2983173115 |
| C | -0.3510628572 | -1.0951701788 | -0.8330857796 |
| H | -0.2228600188 | -2.1817421452 | -0.9803204409 |
| H | -0.3054472971 | -0.6278606067 | -1.8255206842 |
| C | -1.743872243  | -0.7873746037 | -0.25565657   |
| H | -2.478177355  | -1.2258398226 | -0.9440277007 |
| C | 0.8059046954  | -0.5697954291 | 0.0224120079  |
| H | 0.5644966295  | 0.4554083554  | 0.3236909192  |
| H | 0.8755441046  | -1.1546279995 | 0.9520002821  |
| C | 2.151398762   | -0.6278547553 | -0.701281922  |
| H | 2.1096843229  | 0.0210759645  | -1.5883966477 |
| H | 2.3176384473  | -1.6488285075 | -1.0773330826 |
| C | 3.3497618879  | -0.2188382195 | 0.1623902954  |
| H | 3.4078415188  | -0.8871168963 | 1.0335504201  |
| H | 4.2780851594  | -0.3726929231 | -0.4062407642 |
| C | 3.2912970188  | 1.2319614669  | 0.6427477021  |
| H | 2.4259766786  | 1.4031815376  | 1.2896875199  |
| H | 3.2031699141  | 1.9191705136  | -0.2071899052 |
| C | -1.9364344496 | -1.3705227368 | 1.1419632086  |
| H | -1.6369797116 | -2.4292128645 | 1.1985878315  |
| H | -1.3551682097 | -0.7865772768 | 1.8610836987  |
| H | -2.986426766  | -1.2969203281 | 1.4499213498  |
| H | 4.1939751025  | 1.5022091563  | 1.2041757523  |
| O | -1.7087359324 | 1.3908976733  | 0.7669880814  |

Energy = -464.2521106

Zero-point correction = 0.222698 (Hartree/Particle)

Thermal correction to Gibbs Free Energy = 0.183043

Sum of electronic and zero-point Energies = -464.029412

Sum of electronic and thermal Energies = -464.017474

Sum of electronic and thermal Enthalpies = -464.016530

Sum of electronic and thermal Free Energies = -464.069068

G + ZVPE = -463.846370

Energy (DMF-6-31G(d)) = -464.3400257

Energy (DMF-def2-TZVP) = -464.5309136

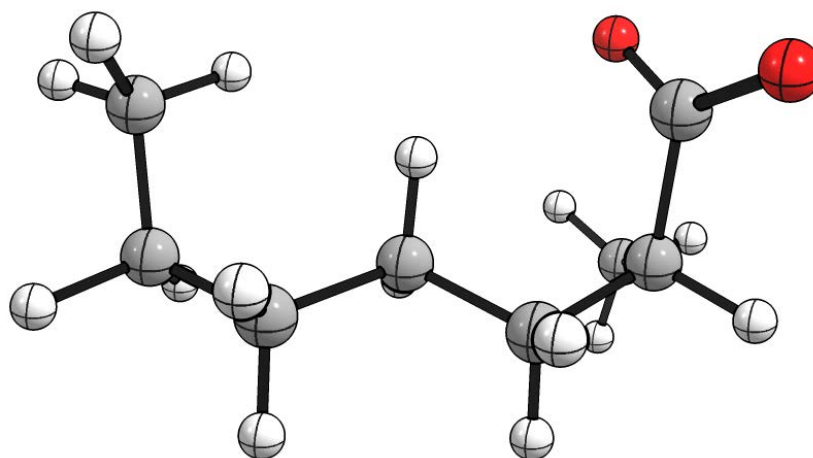

A<sub>1</sub>

|    |               |               |               |
|----|---------------|---------------|---------------|
| C  | -1.9652111416 | -3.7540185338 | 0.2528966002  |
| C  | -3.2285986829 | -3.3944468948 | -0.2352624317 |
| C  | -3.4651855735 | -2.0674848286 | -0.5232446924 |
| C  | -2.4473490434 | -1.126870818  | -0.3305569561 |
| C  | -0.987924216  | -2.7925472375 | 0.4176608747  |
| C  | -2.5920363853 | 0.2831932401  | -0.6244435992 |
| C  | -3.8144519733 | 0.9620534283  | -0.6563410999 |
| C  | -3.8304017789 | 2.3221588562  | -0.8801699674 |
| H  | -4.7643911794 | 2.8742091252  | -0.899898074  |
| C  | -2.6071530099 | 2.9816428471  | -1.0697944046 |
| C  | -1.4234507587 | 2.2731981094  | -1.0365233053 |
| H  | -1.749553667  | -4.783743809  | 0.5208436946  |
| H  | -3.9992104129 | -4.1436843287 | -0.3855144593 |
| H  | -2.5816827856 | 4.0488868441  | -1.2666152259 |
| N  | -1.3971061298 | 0.9197249834  | -0.8395876853 |
| N  | -1.2012226689 | -1.4756545435 | 0.1290167133  |
| C  | -0.0996780533 | 2.9439717377  | -1.2587389183 |
| H  | 0.4425075016  | 3.0875490535  | -0.3163710647 |
| H  | 0.5344998911  | 2.3176433295  | -1.898581514  |
| H  | -0.2247729736 | 3.9278458108  | -1.7200206928 |
| C  | 0.3669043698  | -3.1456396294 | 0.9574373371  |
| H  | 1.1169153474  | -3.1736011349 | 0.1584745619  |
| H  | 0.6828552024  | -2.3820833112 | 1.6773079324  |
| H  | 0.3576672286  | -4.1202332235 | 1.4533579046  |
| Ni | 0.0689199361  | -0.1534459751 | -0.4401332428 |
| C  | 3.259492863   | -0.7572003942 | 0.3384121418  |
| H  | 2.9172894837  | -1.5423672305 | 1.0179011393  |
| Br | 2.0195841112  | -0.9364126962 | -1.2426763415 |
| H  | -4.7354711381 | 0.4204919144  | -0.4675969165 |
| H  | -4.4197343399 | -1.7503894341 | -0.9302850267 |
| C  | 4.6752965322  | -1.0102788173 | -0.1406820767 |
| H  | 5.3679214523  | -0.941368028  | 0.7065761365  |
| H  | 4.7743828925  | -2.0056777312 | -0.582040193  |
| H  | 4.973921641   | -0.2681286364 | -0.8876330777 |
| C  | 3.0428892226  | 0.6164424755  | 0.9567744242  |
| H  | 3.668384603   | 0.6500787964  | 1.8605977175  |
| H  | 3.4254326132  | 1.3900544841  | 0.2776582048  |
| C  | 1.5999505035  | 0.9280048651  | 1.3417255978  |
| H  | 1.0084213239  | 1.0942453411  | 0.4120524316  |
| H  | 1.1721426802  | 0.0740334731  | 1.878554755   |
| C  | 1.4308855031  | 2.18134044    | 2.1926274631  |
| H  | 2.0445292976  | 2.0997040075  | 3.1012304922  |
| H  | 1.8124226712  | 3.0548208101  | 1.6432298087  |
| C  | -0.0291690612 | 2.4158553334  | 2.5851331145  |
| H  | -0.655151017  | 2.4335338105  | 1.6837875183  |
| H  | -0.3803076395 | 1.5585084539  | 3.1739880247  |
| C  | -0.2305857265 | 3.7063318349  | 3.3751749705  |
| H  | 0.0693039867  | 4.5796088775  | 2.7841118914  |
| H  | -1.2794736659 | 3.8392750932  | 3.6584833443  |
| H  | 0.3681221642  | 3.7061088598  | 4.2936671709  |

Energy = -4929.4246696  
Zero-point correction = 0.429855 (Hartree/Particle)  
Thermal correction to Gibbs Free Energy = 0.373937  
Sum of electronic and zero-point Energies = -4928.994815  
Sum of electronic and thermal Energies = -4928.969708  
Sum of electronic and thermal Enthalpies = -4928.968764  
Sum of electronic and thermal Free Energies = -4929.050733  
G + ZVPE = -4928.620878  
Energy (DMF-6-31G(d)) = -4929.4482558  
Energy (DMF-def2-TZVP) = -4932.4472426

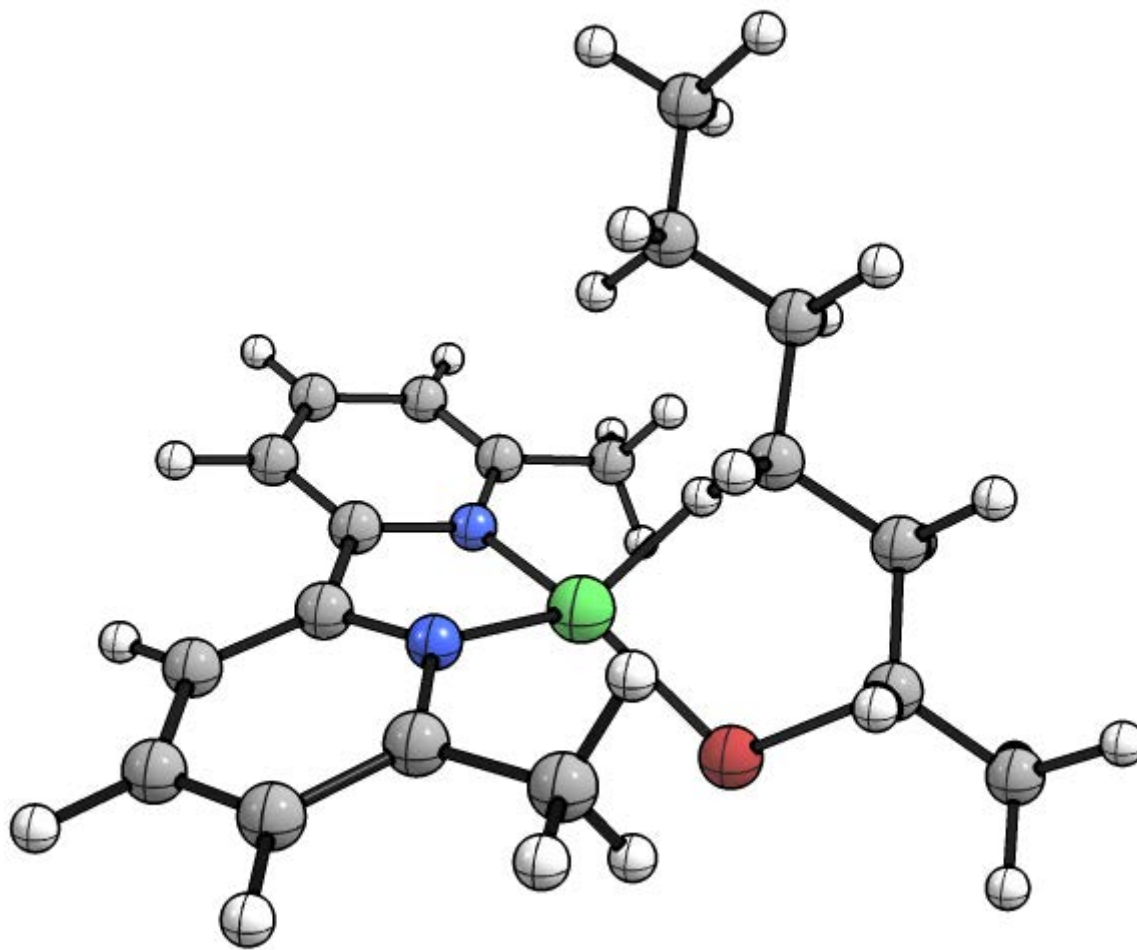

A<sub>2</sub>

|    |               |               |               |
|----|---------------|---------------|---------------|
| C  | 1.4434201384  | -2.8471704339 | -1.6003898063 |
| C  | 2.5893600443  | -2.289938585  | -1.061876842  |
| C  | 2.5956339553  | -0.9300851628 | -0.7737563098 |
| C  | 1.425824229   | -0.2135699389 | -0.9695264737 |
| C  | 0.3003522572  | -2.0609944524 | -1.7913222092 |
| C  | 1.3391146972  | 1.2463492874  | -0.7603667662 |
| C  | 2.4321472887  | 2.0972860933  | -0.842819469  |
| C  | 2.2110397244  | 3.466175513   | -0.7667748849 |
| H  | 3.0417999794  | 4.1613724424  | -0.8317684325 |
| C  | 0.9098862503  | 3.9295458895  | -0.6550172535 |
| C  | -0.1479542915 | 3.0244827558  | -0.5662256173 |
| H  | 1.4178121747  | -3.8921666994 | -1.8909741803 |
| H  | 3.4749472284  | -2.8938354409 | -0.8918038518 |
| H  | 0.6972296947  | 4.9930592972  | -0.6398554571 |
| N  | 0.0823150578  | 1.6986333209  | -0.5762713863 |
| N  | 0.2752637711  | -0.7704232099 | -1.412542267  |
| C  | -1.5649786455 | 3.5039218294  | -0.4718129314 |
| H  | -2.2527491675 | 2.7558340471  | -0.8715921106 |
| H  | -1.8434761921 | 3.6825541856  | 0.5713551075  |
| H  | -1.6854101559 | 4.4408829517  | -1.0225253143 |
| C  | -0.9063410004 | -2.6487131893 | -2.4557872841 |
| H  | -1.5861119217 | -3.0797489194 | -1.7158822905 |
| H  | -1.4655603027 | -1.876912295  | -2.9856029099 |
| H  | -0.5985741734 | -3.4291291151 | -3.1584705643 |
| Ni | -1.184837943  | 0.313044317   | -0.2842028967 |
| C  | -1.1410128651 | -0.1538461828 | 2.453978538   |
| H  | -1.8635954178 | -0.9794027316 | 2.4488554572  |
| H  | -1.1566343136 | 0.2664416733  | 3.4742360471  |
| C  | -1.5983221525 | 0.9394187304  | 1.4757010684  |
| H  | -0.9374312383 | 1.8043707943  | 1.654600474   |
| Br | -2.9546403733 | -1.083576312  | -0.3882469057 |
| C  | 0.2521763713  | -0.7226653427 | 2.1800567796  |
| H  | 0.2155628845  | -1.3371166333 | 1.270126797   |
| H  | 0.9453929236  | 0.1064823192  | 1.9750667339  |
| C  | 0.7982825523  | -1.5936588167 | 3.3102275664  |
| H  | 0.9036166101  | -0.9927321582 | 4.2248836399  |
| H  | 0.0588951312  | -2.3732399164 | 3.5361408863  |
| C  | -3.0230804574 | 1.3762370129  | 1.8145109967  |
| H  | -3.6977256461 | 0.5178425654  | 1.8665242306  |
| H  | -3.0496920021 | 1.8890658785  | 2.7886533749  |
| H  | -3.4453420209 | 2.0572091098  | 1.0682896904  |
| C  | 2.1381462638  | -2.2587357236 | 2.9763958042  |
| H  | 2.0298952403  | -2.8216672214 | 2.0387611899  |
| H  | 2.3819113621  | -2.9950147747 | 3.7525303576  |
| C  | 3.3005911497  | -1.2738689395 | 2.8455654098  |
| H  | 3.1096101003  | -0.5295556792 | 2.0650256975  |
| H  | 3.4607875067  | -0.731722781  | 3.7848071361  |
| H  | 4.2333129021  | -1.7911313725 | 2.5938885906  |
| H  | 3.428235189   | 1.7011418981  | -1.0008373263 |
| H  | 3.4823296528  | -0.4495403446 | -0.3771563126 |

Energy = -4929.5169541  
Zero-point correction = 0.431682 (Hartree/Particle)  
Thermal correction to Gibbs Free Energy = 0.376510  
Sum of electronic and zero-point Energies = -4929.085272  
Sum of electronic and thermal Energies = -4929.060493  
Sum of electronic and thermal Enthalpies = -4929.059549  
Sum of electronic and thermal Free Energies = -4929.140444  
G + ZVPE = -4928.708762  
Energy (DMF-6-31G(d)) = -4929.5444921  
Energy (DMF-def2-TZVP) = -4932.5290997

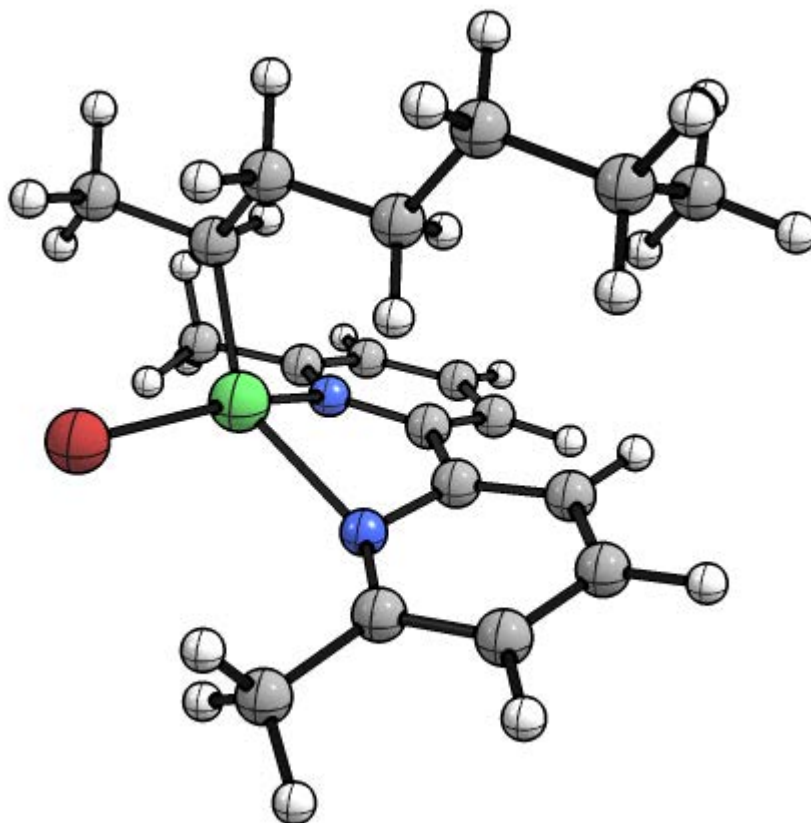



**A<sub>2</sub>-solv**

|    |               |               |               |
|----|---------------|---------------|---------------|
| C  | 1.2275689296  | -2.9365456773 | -2.0114418212 |
| C  | 2.3881184725  | -2.5320727325 | -1.3740682994 |
| C  | 2.4698190338  | -1.2312835201 | -0.8856953899 |
| C  | 1.3487311924  | -0.4240287347 | -0.991205285  |
| C  | 0.1340983322  | -2.0672367713 | -2.0884610506 |
| C  | 1.3403148137  | 1.0133145067  | -0.6411144003 |
| C  | 2.4825726744  | 1.793055135   | -0.5582793895 |
| C  | 2.3300726086  | 3.167710896   | -0.4069005468 |
| H  | 3.2022845094  | 3.8101148145  | -0.3420743063 |
| C  | 1.0544689837  | 3.7076409049  | -0.3906120559 |
| C  | -0.058172885  | 2.8663526929  | -0.4507365607 |
| H  | 1.1546600677  | -3.9187624744 | -2.467089273  |
| H  | 3.2361311804  | -3.2042227699 | -1.290488612  |
| H  | 0.9017999765  | 4.7801372896  | -0.333838824  |
| N  | 0.0988034855  | 1.5336986891  | -0.5227193376 |
| N  | 0.1740366498  | -0.8546177137 | -1.5127239141 |
| C  | -1.4461883241 | 3.4313865534  | -0.4514701815 |
| H  | -2.1640085759 | 2.6874965313  | -0.8026030745 |
| H  | -1.7407688578 | 3.7499392234  | 0.553953122   |
| H  | -1.4892165818 | 4.3086837083  | -1.104048787  |
| C  | -1.0814576637 | -2.463319018  | -2.8712596559 |
| H  | -1.6718479216 | -3.2110385918 | -2.3355144688 |
| H  | -1.7198139174 | -1.5997104646 | -3.0610829204 |
| H  | -0.7653092267 | -2.8960167213 | -3.8267844171 |
| Ni | -1.172988735  | 0.1490006052  | -0.2632727011 |
| C  | -1.1497020482 | -0.1118643049 | 2.5328642348  |
| H  | -1.793856642  | -0.9993146417 | 2.5821485474  |
| H  | -1.2255569316 | 0.3841800759  | 3.5171736165  |
| C  | -1.6687820322 | 0.8516415838  | 1.4532359117  |
| H  | -1.0930983628 | 1.7802993352  | 1.5849705968  |
| Br | -2.7194974819 | -1.5322845964 | -0.1576827356 |
| C  | 0.2970214475  | -0.5613656154 | 2.3219480444  |
| H  | 0.3417088593  | -1.223701835  | 1.445775487   |
| H  | 0.9096691932  | 0.3172675948  | 2.0773724762  |
| C  | 0.9175943307  | -1.3028119212 | 3.5041810859  |
| H  | 0.9738092789  | -0.6328178904 | 4.3746872477  |
| H  | 0.2571535236  | -2.132767471  | 3.7922158644  |
| C  | -3.131433923  | 1.2085900999  | 1.7065436087  |
| H  | -3.768131023  | 0.3183781113  | 1.6900659985  |
| H  | -3.2568298443 | 1.6964275158  | 2.6878652133  |
| H  | -3.5251101813 | 1.8981456647  | 0.949854275   |
| C  | 2.3127502937  | -1.8586500903 | 3.1959286978  |
| H  | 2.2394829424  | -2.5564647958 | 2.3498745089  |
| H  | 2.6638429234  | -2.446559264  | 4.0537272124  |
| C  | 3.3489452785  | -0.7821536811 | 2.8726650523  |
| H  | 3.0851156233  | -0.219734463  | 1.9698946602  |
| H  | 3.4373525549  | -0.0630237729 | 3.6968158027  |
| H  | 4.3380755856  | -1.2245463562 | 2.707849421   |
| H  | 3.4664366109  | 1.3478963052  | -0.6454319362 |
| H  | 3.3807538531  | -0.8632524081 | -0.4282372214 |

Energy = -4929.5449154  
Zero-point correction = 0.430883 (Hartree/Particle)  
Thermal correction to Gibbs Free Energy = 0.375407  
Sum of electronic and zero-point Energies = -4929.114033  
Sum of electronic and thermal Energies = -4929.089287  
Sum of electronic and thermal Enthalpies = -4929.088343  
Sum of electronic and thermal Free Energies = -4929.169508  
G + ZVPE = -4928.738625

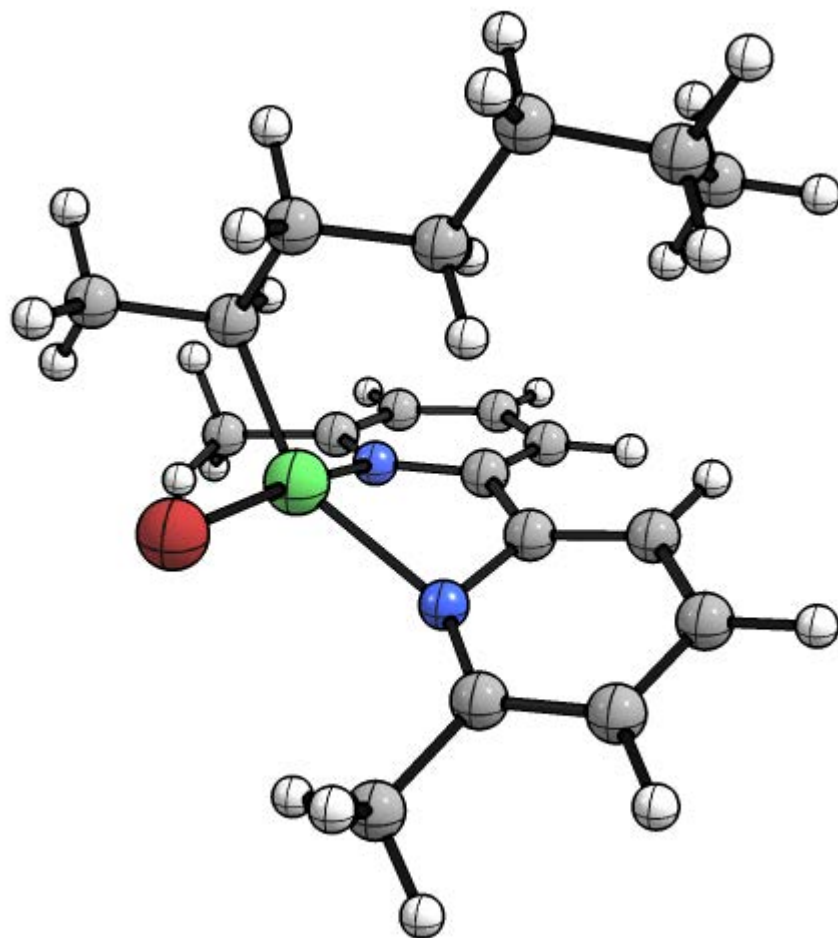

A

|    |               |               |               |
|----|---------------|---------------|---------------|
| C  | -2.2846115567 | -3.4647544061 | 0.8185087792  |
| C  | -3.5470060438 | -3.0382365352 | 0.3658192611  |
| C  | -3.6751413289 | -1.7603071402 | -0.1301031402 |
| C  | -2.5650385524 | -0.9063536288 | -0.1461662097 |
| C  | -1.21982615   | -2.5937764832 | 0.8029563546  |
| C  | -2.5409485179 | 0.4092625491  | -0.7367554944 |
| C  | -3.6624149295 | 1.2272663231  | -0.9238310915 |
| C  | -3.5012392981 | 2.5098127772  | -1.3977106941 |
| H  | -4.3571897042 | 3.1614433306  | -1.538755911  |
| C  | -2.1989471196 | 2.9775811005  | -1.654047816  |
| C  | -1.1216133377 | 2.1411147915  | -1.4743422987 |
| H  | -2.145111313  | -4.4719346707 | 1.197871821   |
| H  | -4.3931455854 | -3.717282121  | 0.3764343899  |
| H  | -2.035630782  | 3.9895925323  | -2.010349964  |
| N  | -1.2769775064 | 0.8326680626  | -1.1061581068 |
| N  | -1.3591728816 | -1.2900311262 | 0.4124034059  |
| C  | 0.2972805471  | 2.5618349002  | -1.7191562035 |
| H  | 0.8544801112  | 2.6267794878  | -0.7758305858 |
| H  | 0.8002287167  | 1.814949374   | -2.3474087977 |
| H  | 0.3571589257  | 3.5389943572  | -2.2060799225 |
| C  | 0.1580034664  | -2.9694546056 | 1.2619109034  |
| H  | 0.8542453845  | -3.0132437619 | 0.4146418177  |
| H  | 0.5349285746  | -2.2088805498 | 1.9583007447  |
| H  | 0.174480609   | -3.9457986179 | 1.7538421434  |
| Ni | -0.0790839759 | -0.2084452162 | -0.2515099691 |
| H  | -4.6436113338 | 0.859424735   | -0.6421009575 |
| H  | -4.6132694184 | -1.4233494583 | -0.5588224584 |

Energy = -2081.8984864

Zero-point correction = 0.215774 (Hartree/Particle)

Thermal correction to Gibbs Free Energy = 0.174630

Sum of electronic and zero-point Energies = -2081.682712

Sum of electronic and thermal Energies = -2081.669093

Sum of electronic and thermal Enthalpies = -2081.668149

Sum of electronic and thermal Free Energies = -2081.723857

G + ZVPE = -2081.508083

Energy (DMF-6-31G(d)) = -2081.924293

Energy (DMF-def2-TZVP) = -2082.3707816

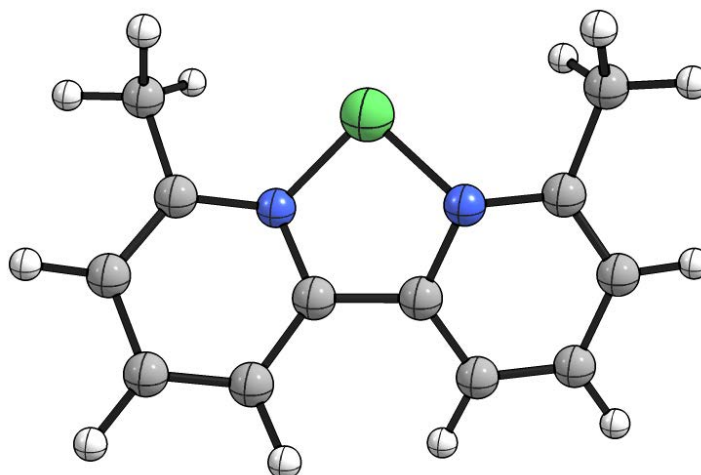

**B**

|    |               |               |               |
|----|---------------|---------------|---------------|
| C  | -0.5471936055 | 3.448072554   | -0.876877701  |
| C  | -1.3334447106 | 3.4465885018  | 0.263969046   |
| C  | -1.729995716  | 2.2338919402  | 0.8168587967  |
| C  | -1.3064819766 | 1.0601122564  | 0.2131500968  |
| C  | -0.1333740037 | 2.2367872012  | -1.4307895367 |
| C  | -1.7658436169 | -0.2921175727 | 0.6170148722  |
| C  | -2.6619372065 | -0.5207245565 | 1.647560819   |
| C  | -3.1481928584 | -1.8100296525 | 1.8344179014  |
| H  | -3.8454476021 | -2.0213709025 | 2.6380009487  |
| C  | -2.7672351959 | -2.8056172176 | 0.9524773707  |
| C  | -1.8479401107 | -2.5285993189 | -0.061256592  |
| H  | -0.2502958809 | 4.3788911483  | -1.346720437  |
| H  | -1.6541821361 | 4.3814165891  | 0.7110912533  |
| H  | -3.1770634615 | -3.8061492481 | 1.0331147635  |
| N  | -1.3140660558 | -1.29785194   | -0.1778632274 |
| N  | -0.4982620071 | 1.0688244454  | -0.87308173   |
| C  | -1.4741891105 | -3.5941746126 | -1.0481671365 |
| H  | -1.2102056606 | -3.1590982238 | -2.0131857738 |
| H  | -0.6238923568 | -4.183386131  | -0.6911634627 |
| H  | -2.3141635231 | -4.2785451656 | -1.1897160262 |
| C  | 0.7316692587  | 2.1938919539  | -2.6568653672 |
| H  | 1.7853632525  | 2.0582287474  | -2.3847503877 |
| H  | 0.4365887841  | 1.3726874544  | -3.3162024483 |
| H  | 0.6577331825  | 3.1276560031  | -3.2180572768 |
| Ni | 0.2111093673  | -0.7181330473 | -1.1026474336 |
| C  | 2.1919623776  | -1.1045866506 | -1.5694407552 |
| H  | 1.5778436536  | -0.1184493955 | -1.7276989937 |
| H  | 2.5664676257  | -1.2841564259 | -2.5781686839 |
| C  | 1.3417124067  | -2.1862968929 | -1.0059183124 |
| H  | 1.1663251832  | -2.9990648141 | -1.7136837595 |
| C  | 1.6735622634  | -2.6759335093 | 0.3908194258  |
| H  | 1.8365377595  | -1.8150036083 | 1.0529962302  |
| H  | 0.8166388752  | -3.2206995623 | 0.8107098832  |
| C  | 2.904693983   | -3.5905790616 | 0.4224993438  |
| H  | 2.7576252893  | -4.4012109821 | -0.3032707372 |
| H  | 3.7813704394  | -3.0245629601 | 0.0779438239  |
| C  | 3.1962067613  | -4.1928789703 | 1.7995230101  |
| H  | 4.0415196506  | -4.885775483  | 1.7033711299  |
| H  | 2.338701774   | -4.8017323015 | 2.1199065428  |
| C  | 3.5209796708  | -3.1664086914 | 2.8872302444  |
| H  | 4.3351671919  | -2.5161865765 | 2.5387892903  |
| H  | 2.6551110917  | -2.5136477388 | 3.0591605614  |
| C  | 3.9198035909  | -3.8238148995 | 4.2074877075  |
| H  | 4.1390926066  | -3.0761901196 | 4.9758308169  |
| H  | 3.1155083984  | -4.4660702172 | 4.5836967266  |
| H  | 4.8114433326  | -4.4477166025 | 4.0822913198  |
| H  | 2.9918635275  | -0.7511574476 | -0.913747746  |
| H  | -2.3672528437 | 2.2184311533  | 1.6919540485  |
| H  | -2.9925240586 | 0.2847352209  | 2.2907934914  |

Energy= -2357.5399768  
Zero-point correction= 0.431349 (Hartree/Particle)  
Thermal correction to Gibbs Free Energy= 0.379318  
Sum of electronic and zero-point Energies= -2357.108628  
Sum of electronic and thermal Energies= -2357.086120  
Sum of electronic and thermal Enthalpies= -2357.085175  
Sum of electronic and thermal Free Energies= -2357.160659  
G + ZVPE = -2356.729310  
Energy(DMF-631G(d))= -2357.6190886  
Energy(DMF-def2-TZVP)= -2358.1329088

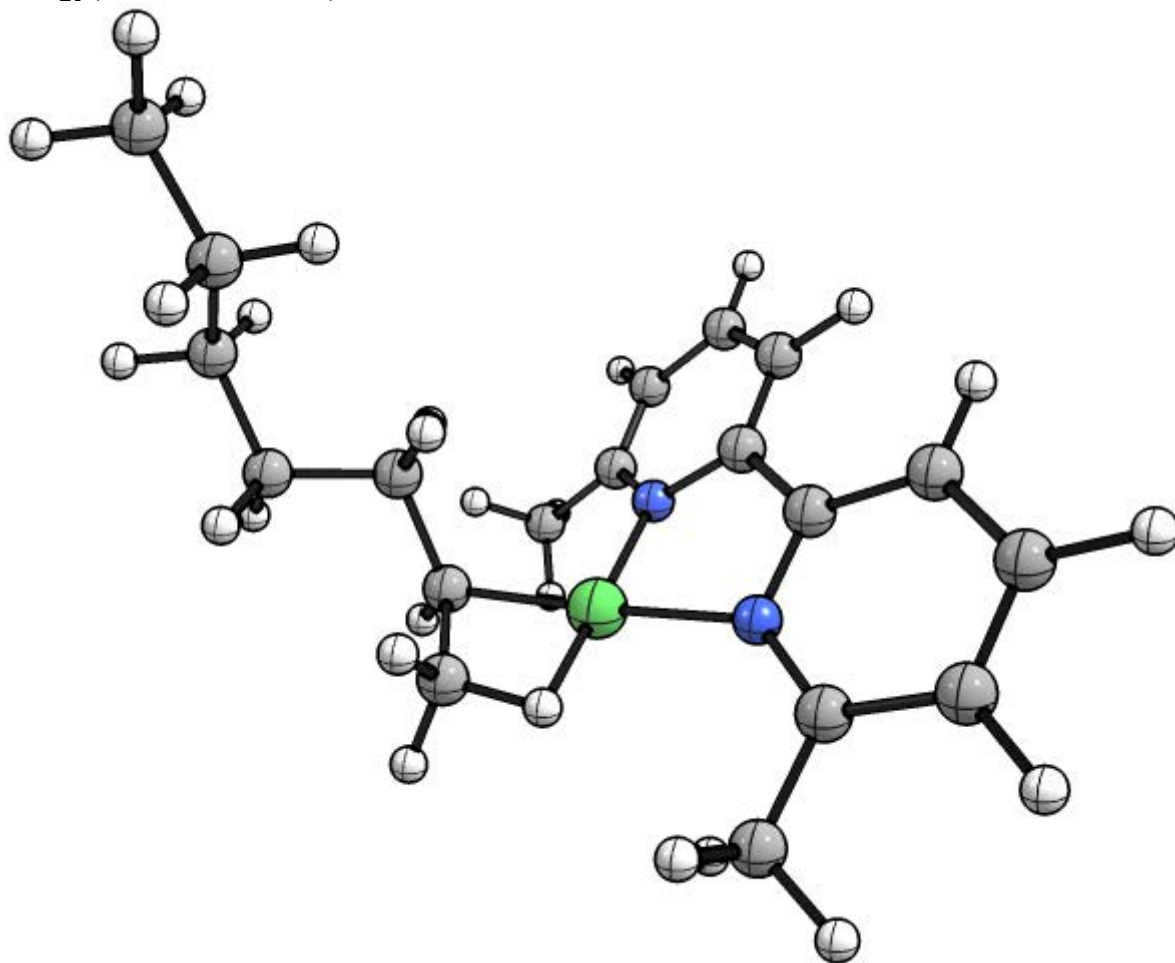

**Bromide+DMF-solv**

|    |           |           |           |
|----|-----------|-----------|-----------|
| Br | 0.001054  | -0.000402 | 0.57972   |
| C  | -3.489325 | -3.549625 | -0.729789 |
| O  | -3.725784 | -3.732522 | -1.920501 |
| H  | -3.441402 | -4.386565 | -0.010104 |
| N  | -3.254971 | -2.35976  | -0.145371 |
| C  | -3.011824 | -2.238307 | 1.279048  |
| H  | -2.856496 | -3.228146 | 1.71672   |
| H  | -2.117255 | -1.625643 | 1.435792  |
| H  | -3.864324 | -1.763462 | 1.780845  |
| C  | -3.291013 | -1.126429 | -0.909444 |
| H  | -2.390587 | -0.547087 | -0.679481 |
| H  | -3.322655 | -1.369657 | -1.972292 |
| H  | -4.178835 | -0.537296 | -0.646077 |
| C  | 4.900494  | -0.913202 | 1.730605  |
| O  | 5.732693  | -1.043858 | 0.837702  |
| H  | 5.129939  | -0.371608 | 2.665697  |
| N  | 3.637257  | -1.379391 | 1.706184  |
| C  | 2.738443  | -1.228293 | 2.834847  |
| H  | 3.162812  | -0.527881 | 3.559479  |
| H  | 1.776064  | -0.844465 | 2.478078  |
| H  | 2.57546   | -2.194115 | 3.331417  |
| C  | 3.144366  | -2.151834 | 0.58239   |
| H  | 3.025967  | -3.206155 | 0.865234  |
| H  | 2.172235  | -1.753247 | 0.275969  |
| H  | 3.857364  | -2.081853 | -0.239893 |
| C  | -4.899524 | 0.91332   | 1.736228  |
| O  | -5.733731 | 1.041365  | 0.84483   |
| H  | -5.126931 | 0.374796  | 2.673582  |
| N  | -3.636194 | 1.379017  | 1.707338  |
| C  | -2.734936 | 1.231342  | 2.834521  |
| H  | -3.157518 | 0.532599  | 3.561808  |
| H  | -1.773178 | 0.846937  | 2.476726  |
| H  | -2.571287 | 2.198509  | 3.328249  |
| C  | -3.145996 | 2.148286  | 0.580234  |
| H  | -2.174111 | 1.749625  | 0.273181  |
| H  | -3.860477 | 2.075333  | -0.240503 |
| H  | -3.027822 | 3.203586  | 0.859499  |
| C  | 1.68627   | -4.347439 | -1.576522 |
| O  | 2.185379  | -4.269716 | -2.693926 |
| H  | 2.100423  | -5.014342 | -0.798996 |
| N  | 0.608093  | -3.664721 | -1.142711 |
| C  | 0.080296  | -3.832467 | 0.196957  |
| H  | 0.76176   | -4.443905 | 0.794646  |
| H  | -0.030242 | -2.848354 | 0.666028  |
| H  | -0.898525 | -4.326929 | 0.169247  |
| C  | -0.090809 | -2.732679 | -2.008349 |
| H  | -0.16588  | -1.76509  | -1.499566 |
| H  | 0.472354  | -2.626996 | -2.936509 |
| H  | -1.098019 | -3.103145 | -2.237197 |
| C  | 3.488182  | 3.553481  | -0.727665 |
| O  | 3.724599  | 3.737042  | -1.918284 |
| H  | 3.440234  | 4.390025  | -0.007498 |
| N  | 3.253927  | 2.363239  | -0.143981 |
| C  | 3.01139   | 2.240782  | 1.280466  |
| H  | 2.857052  | 3.230383  | 1.719055  |
| H  | 2.116412  | 1.628716  | 1.437123  |

|   |           |          |           |
|---|-----------|----------|-----------|
| H | 3.863858  | 1.765016 | 1.781434  |
| C | 3.291229  | 1.130339 | -0.908697 |
| H | 4.182157  | 0.544249 | -0.649069 |
| H | 2.393569  | 0.54795  | -0.675615 |
| H | 3.317998  | 1.373969 | -1.971596 |
| C | -1.687818 | 4.34369  | -1.579822 |
| O | -2.185892 | 4.264892 | -2.697618 |
| H | -2.103202 | 5.010713 | -0.803046 |
| N | -0.609327 | 3.662288 | -1.14477  |
| C | -0.082759 | 3.830935 | 0.195275  |
| H | -0.764791 | 4.442649 | 0.792044  |
| H | 0.027749  | 2.84708  | 0.664926  |
| H | 0.895962  | 4.325597 | 0.167852  |
| C | 0.091847  | 2.731175 | -2.009567 |
| H | 1.098829  | 3.103123 | -2.237027 |
| H | 0.167774  | 1.763709 | -1.500688 |
| H | -0.469984 | 2.624688 | -2.938432 |

Energy = -4062.6172323

Zero-point correction = 0.637273 (Hartree/Particle)

Thermal correction to Gibbs Free Energy = 0.552462

Sum of electronic and zero-point Energies = -4061.979959

Sum of electronic and thermal Energies = -4061.935183

Sum of electronic and thermal Enthalpies = -4061.934238

Sum of electronic and thermal Free Energies = -4062.064770

G + ZVPE = -4061.427497

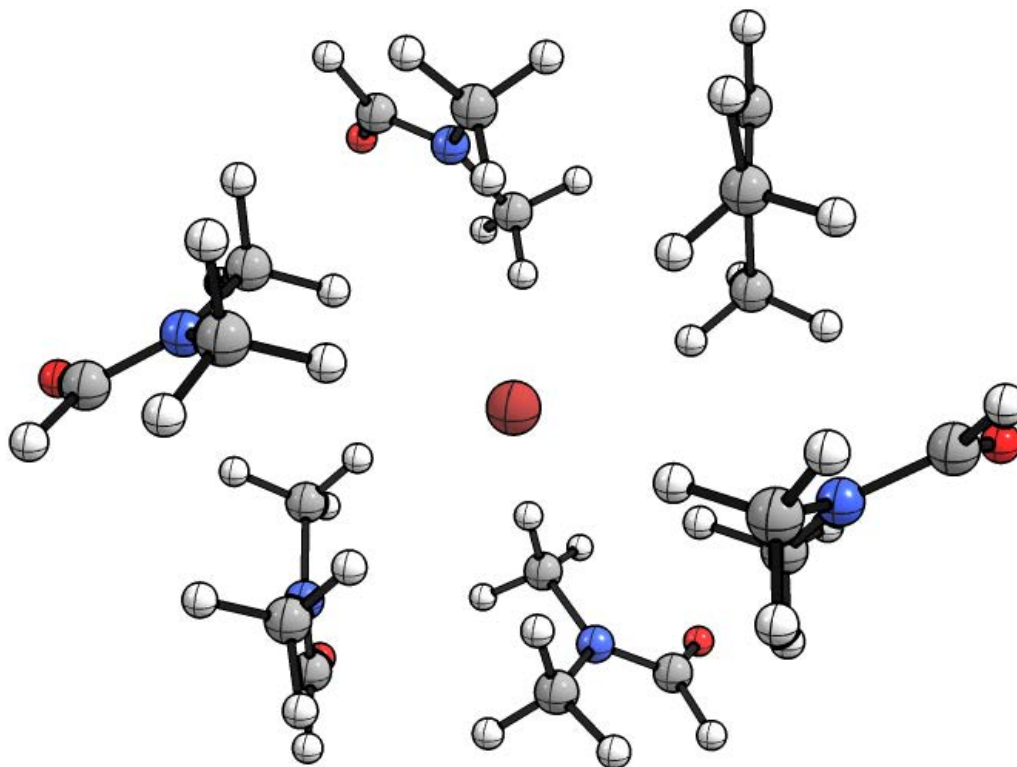

**B-solv**

|    |               |               |               |
|----|---------------|---------------|---------------|
| C  | -0.4890336803 | 3.4228318649  | -0.8290327386 |
| C  | -1.243751414  | 3.4188214409  | 0.3330102064  |
| C  | -1.656638092  | 2.2072330802  | 0.8775197197  |
| C  | -1.2795200538 | 1.0358209771  | 0.2394148102  |
| C  | -0.1193064026 | 2.2116311591  | -1.414640815  |
| C  | -1.7607670032 | -0.3132096786 | 0.6253942093  |
| C  | -2.6656522188 | -0.5413122186 | 1.6486900965  |
| C  | -3.1698335991 | -1.8265583927 | 1.8146725607  |
| H  | -3.875838487  | -2.0375848908 | 2.6108838046  |
| C  | -2.7966455392 | -2.8176255308 | 0.9237676408  |
| C  | -1.8686448499 | -2.5394088868 | -0.0812715353 |
| H  | -0.1804920472 | 4.3534066424  | -1.2925509169 |
| H  | -1.527908602  | 4.3530255148  | 0.8062351193  |
| H  | -3.2187037972 | -3.8143991798 | 0.9889561853  |
| N  | -1.3201081001 | -1.3143125189 | -0.1812445749 |
| N  | -0.5005342041 | 1.0449564167  | -0.8676039635 |
| C  | -1.4941717704 | -3.5968608147 | -1.0740157635 |
| H  | -1.2296617953 | -3.1533289649 | -2.0357888383 |
| H  | -0.6417001055 | -4.1847349234 | -0.7189202657 |
| H  | -2.3343360792 | -4.2821547621 | -1.2143070695 |
| C  | 0.7143392341  | 2.1661165474  | -2.6592787657 |
| H  | 1.7705835401  | 2.0113386406  | -2.4074947431 |
| H  | 0.3961357051  | 1.3464964562  | -3.3101080148 |
| H  | 0.6371501099  | 3.1073218298  | -3.208692397  |
| Ni | 0.1932793876  | -0.7431873653 | -1.1282146364 |
| C  | 2.1756804503  | -1.1172564253 | -1.6019288446 |
| H  | 1.5586758875  | -0.142063001  | -1.7752153097 |
| H  | 2.5509275338  | -1.3019670314 | -2.6101217954 |
| C  | 1.3339672853  | -2.2035479792 | -1.0317892647 |
| H  | 1.1638458796  | -3.0252166575 | -1.7309827284 |
| C  | 1.6683845942  | -2.6781587298 | 0.369421059   |
| H  | 1.809957417   | -1.8055921567 | 1.020868821   |
| H  | 0.8191999702  | -3.2382338233 | 0.7852059071  |
| C  | 2.9165910996  | -3.5670016909 | 0.4203149385  |
| H  | 2.7902060978  | -4.3882495103 | -0.2983535938 |
| H  | 3.7853506308  | -2.9863655738 | 0.0784986769  |
| C  | 3.2093157341  | -4.1558238628 | 1.8033333817  |
| H  | 4.0711835652  | -4.8327662393 | 1.7243056666  |
| H  | 2.3583609424  | -4.7763756654 | 2.1201199348  |
| C  | 3.5008327935  | -3.1157585164 | 2.8872163056  |
| H  | 4.311365971   | -2.456439672  | 2.5466816168  |
| H  | 2.6223769506  | -2.475552459  | 3.0363106792  |
| C  | 3.8863001113  | -3.7541523861 | 4.2199808608  |
| H  | 4.0831792141  | -2.9958140656 | 4.9862600754  |
| H  | 3.0828852643  | -4.4027697894 | 4.5902892039  |
| H  | 4.7887908587  | -4.3690542058 | 4.1172355617  |
| H  | 2.9708964102  | -0.7467423392 | -0.9493927421 |
| H  | -2.2661215819 | 2.1904941112  | 1.7725480144  |
| H  | -2.9909756149 | 0.2623798958  | 2.297200201   |



Energy = -2357.6192416  
Zero-point correction = 0.430739 (Hartree/Particle)  
Thermal correction to Gibbs Free Energy = 0.378950  
Sum of electronic and zero-point Energies = -2357.188503  
Sum of electronic and thermal Energies = -2357.166076  
Sum of electronic and thermal Enthalpies = -2357.165132  
Sum of electronic and thermal Free Energies = -2357.240292  
G + ZVPE = -2356.809553

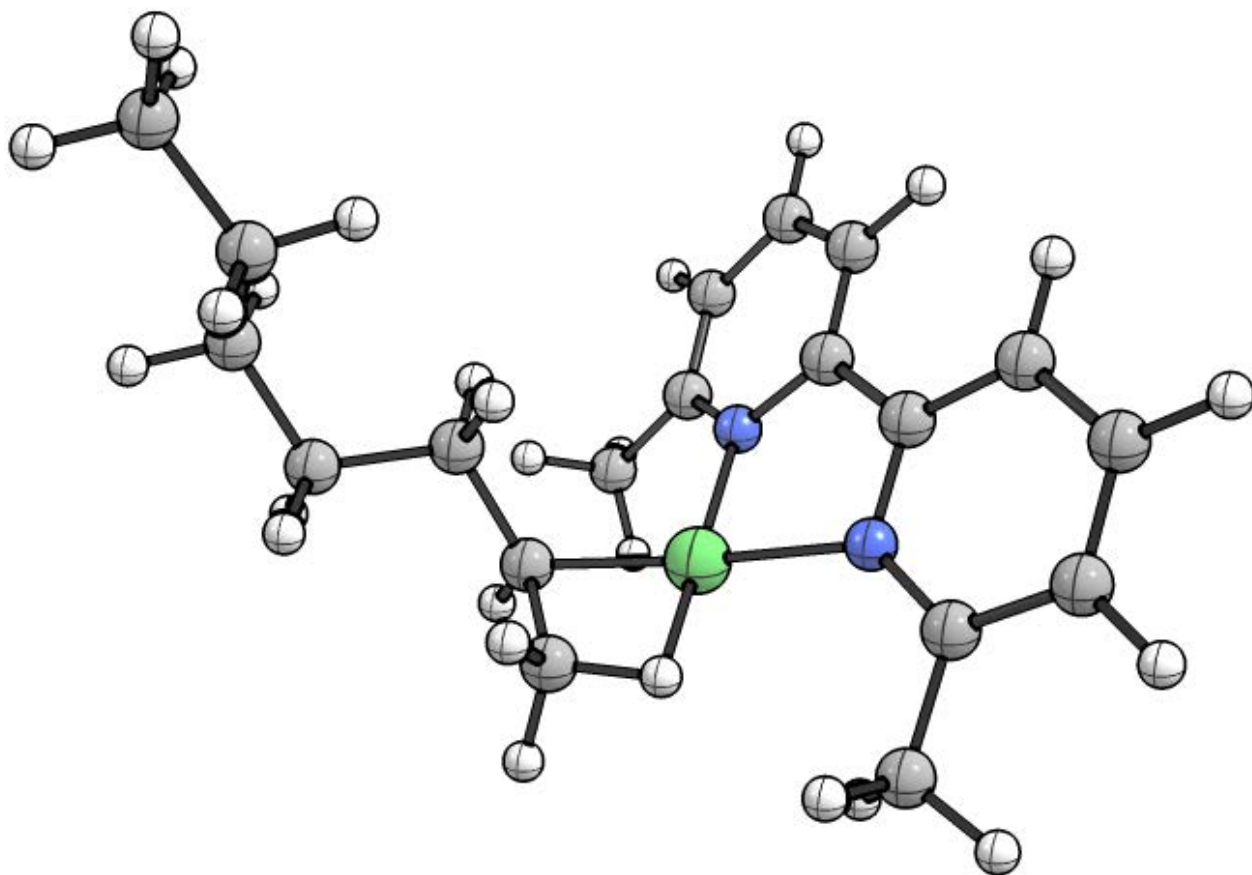

## C

|    |               |               |               |
|----|---------------|---------------|---------------|
| C  | 1.0357998262  | 3.7044187471  | 0.1766948022  |
| C  | 2.4008348888  | 3.4899122967  | 0.0793701758  |
| C  | 2.8798444791  | 2.1899268782  | -0.0382344406 |
| C  | 1.9655732807  | 1.1492343441  | -0.0779147543 |
| C  | 0.1559349984  | 2.6242415035  | 0.1144344546  |
| C  | 2.3493117766  | -0.2839391283 | -0.0727581893 |
| C  | 3.657950793   | -0.7037509314 | -0.2567549233 |
| C  | 3.9570872567  | -2.0489161783 | -0.0856491104 |
| H  | 4.9695956578  | -2.4110896404 | -0.2280273221 |
| C  | 2.9484996018  | -2.9093211859 | 0.311240684   |
| C  | 1.6437003744  | -2.4353540193 | 0.460297801   |
| H  | 0.6390973778  | 4.7054195379  | 0.3009883034  |
| H  | 3.0927442569  | 4.3243810783  | 0.1182039437  |
| H  | 3.1594141208  | -3.9531961802 | 0.5134980939  |
| N  | 1.3384434933  | -1.145277225  | 0.2122044445  |
| N  | 0.6328541303  | 1.3721984291  | -0.0312795505 |
| C  | 0.5752496156  | -3.3651979288 | 0.9602680959  |
| H  | -0.0158255001 | -2.8827111927 | 1.7427059676  |
| H  | -0.0987735786 | -3.6938708781 | 0.1638625898  |
| H  | 1.0300483873  | -4.2602882919 | 1.3890150046  |
| C  | -1.3259271657 | 2.8260384099  | 0.2114076121  |
| H  | -1.7813776495 | 2.7869306714  | -0.7838692316 |
| H  | -1.7905195518 | 2.0454761404  | 0.8179338558  |
| H  | -1.5527362065 | 3.798688849   | 0.6531892661  |
| Ni | -0.340040745  | -0.2062717256 | -0.4165861879 |
| C  | -1.8838887427 | -1.4886374336 | -0.2676266379 |
| H  | -1.266989619  | 0.6317749471  | -1.0978099805 |
| H  | -1.6348707807 | -2.1252179432 | 0.5789906063  |
| C  | -1.1987139335 | -1.6710145044 | -1.4516031243 |
| H  | -1.6100293495 | -1.2872554106 | -2.3820692484 |
| H  | -0.4626721816 | -2.4633169772 | -1.5654061783 |
| C  | -3.2239294581 | -0.8180021878 | -0.1525449407 |
| H  | -3.3987893869 | -0.1796561512 | -1.0235678042 |
| H  | -3.2463528822 | -0.1698258879 | 0.7345550522  |
| C  | -4.3377806122 | -1.870322239  | -0.0291553853 |
| H  | -4.087649407  | -2.5700628558 | 0.7788631323  |
| H  | -4.3688681055 | -2.4589834362 | -0.9551597386 |
| C  | -5.7161970745 | -1.2623400575 | 0.2456670027  |
| H  | -6.4322552739 | -2.0827047489 | 0.3806591139  |
| H  | -5.6898615459 | -0.7197882483 | 1.2011816366  |
| C  | -6.2315482484 | -0.3307552563 | -0.8535543893 |
| H  | -5.5699727612 | 0.5403932407  | -0.9479658082 |
| H  | -6.1940009329 | -0.8545255614 | -1.8183145232 |
| C  | -7.6562641538 | 0.151852362   | -0.5870536187 |
| H  | -7.7171184528 | 0.6903312696  | 0.365383396   |
| H  | -8.0017487972 | 0.8263642796  | -1.3761610796 |
| H  | -8.3539466055 | -0.6911281352 | -0.5374758864 |
| H  | 3.9455729216  | 2.0033655803  | -0.0694076618 |
| H  | 4.435055643   | -0.0010047244 | -0.5297094396 |

Energy = -2357.5150735  
Zero-point correction = 0.429210 (Hartree/Particle)  
Thermal correction to Gibbs Free Energy = 0.374261  
Sum of electronic and zero-point Energies = -2357.085864  
Sum of electronic and thermal Energies = -2357.063037  
Sum of electronic and thermal Enthalpies = -2357.062093  
Sum of electronic and thermal Free Energies = -2357.138957  
G + ZVPE = -2356.709747  
Energy (DMF-6-31G(d)) = -2357.5920888  
Energy (DMF-def2-TZVP) = -2358.1055915

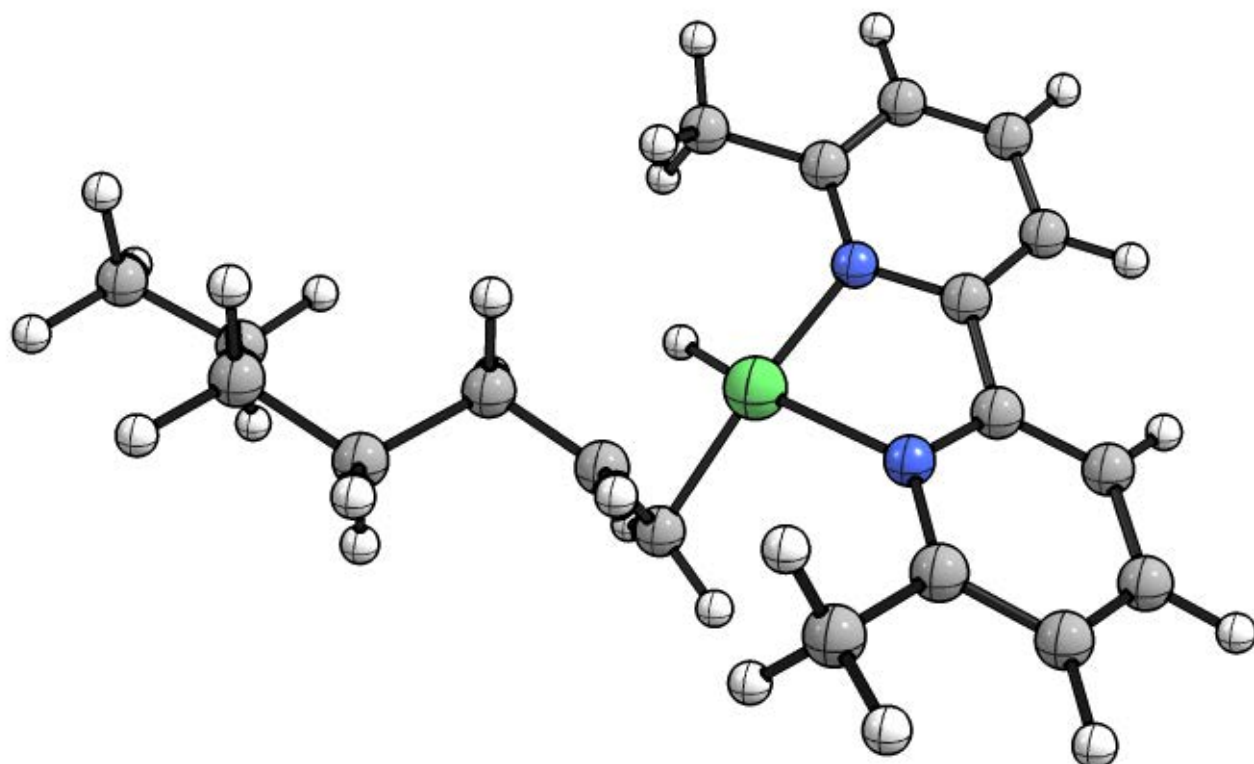

**D**

|    |               |               |               |
|----|---------------|---------------|---------------|
| C  | -0.6771054962 | 3.4760430947  | -1.1450950298 |
| C  | -1.5406510822 | 3.5410570283  | -0.0637378479 |
| C  | -1.9610467002 | 2.3631796781  | 0.543550411   |
| C  | -1.4807705412 | 1.157471859   | 0.0557778962  |
| C  | -0.2117450269 | 2.2369028779  | -1.5835610181 |
| C  | -1.9350621131 | -0.1713201285 | 0.5320362277  |
| C  | -2.9207147501 | -0.3348345564 | 1.4905565349  |
| C  | -3.3722340592 | -1.618551201  | 1.7733477754  |
| H  | -4.1404530985 | -1.7779135502 | 2.5223427464  |
| C  | -2.8525130459 | -2.6819882227 | 1.0582438883  |
| C  | -1.8480457193 | -2.4689516189 | 0.1116830104  |
| H  | -0.3567563928 | 4.3764181761  | -1.6569333959 |
| H  | -1.9011591064 | 4.4990321417  | 0.2954696973  |
| H  | -3.2170862899 | -3.6898786951 | 1.2201314921  |
| N  | -1.3686004377 | -1.2284765376 | -0.1098614355 |
| N  | -0.5992333622 | 1.1039274357  | -0.9694733169 |
| C  | -1.3104794658 | -3.6233405597 | -0.6778942227 |
| H  | -1.1096199632 | -3.3305828238 | -1.7097504068 |
| H  | -0.3791466426 | -3.9936419899 | -0.2399572202 |
| H  | -2.0308664545 | -4.4442607566 | -0.6796367056 |
| C  | 0.7282726594  | 2.129289714   | -2.7492782898 |
| H  | 1.7653661638  | 2.0302846547  | -2.406294739  |
| H  | 0.4845910893  | 1.2625119333  | -3.3697457095 |
| H  | 0.6756525492  | 3.0238169084  | -3.3732519889 |
| Ni | 0.1615420488  | -0.6667110679 | -1.0521351756 |
| C  | 2.1856113405  | -0.9744670379 | -1.447466132  |
| H  | 1.4922466028  | -0.049754004  | -1.6868140908 |
| H  | 2.572775855   | -1.1529410751 | -2.4554627494 |
| C  | 1.3488628639  | -2.0909385888 | -0.9491564054 |
| H  | 1.572975036   | -2.4256971449 | 0.0669495238  |
| H  | 1.2383060501  | -2.9286950501 | -1.6363726794 |
| C  | 3.2547696753  | -0.4068604094 | -0.515537646  |
| H  | 3.5690360416  | 0.5823059573  | -0.8687277782 |
| H  | 2.8211111978  | -0.2640636881 | 0.4835852617  |
| C  | 4.4648176595  | -1.3386473418 | -0.423860734  |
| H  | 4.1167174609  | -2.3445101451 | -0.1570739803 |
| H  | 4.9276001922  | -1.4224725564 | -1.4167234    |
| C  | 5.5149112726  | -0.883309339  | 0.5932114624  |
| H  | 6.2998078128  | -1.6479213373 | 0.6462186414  |
| H  | 5.059412465   | -0.8441329813 | 1.5928488064  |
| C  | 6.1625509651  | 0.4672404149  | 0.2783341505  |
| H  | 6.5755432582  | 0.4417684995  | -0.7392513177 |
| H  | 5.4016036271  | 1.2587886172  | 0.284599149   |
| C  | 7.2653244199  | 0.8310866982  | 1.2709163354  |
| H  | 7.7100398106  | 1.8019450408  | 1.0327002659  |
| H  | 6.8718884058  | 0.8824873245  | 2.2924269068  |
| H  | 8.0662735309  | 0.0837313539  | 1.2604883576  |
| H  | -2.655794617  | 2.3983638196  | 1.3729116247  |
| H  | -3.3476851598 | 0.5175039701  | 2.0031385699  |

Energy = -2357.5396839  
Zero-point correction = 0.432276 (Hartree/Particle)  
Thermal correction to Gibbs Free Energy = 0.379752  
Sum of electronic and zero-point Energies = -2357.107408  
Sum of electronic and thermal Energies = -2357.085128  
Sum of electronic and thermal Enthalpies = -2357.084184  
Sum of electronic and thermal Free Energies = -2357.159932  
G + ZVPE = -2356.727656  
Energy (DMF-6-31G(d)) = -2357.6185  
Energy (DMF-def2-TZVP) = -2358.1326405

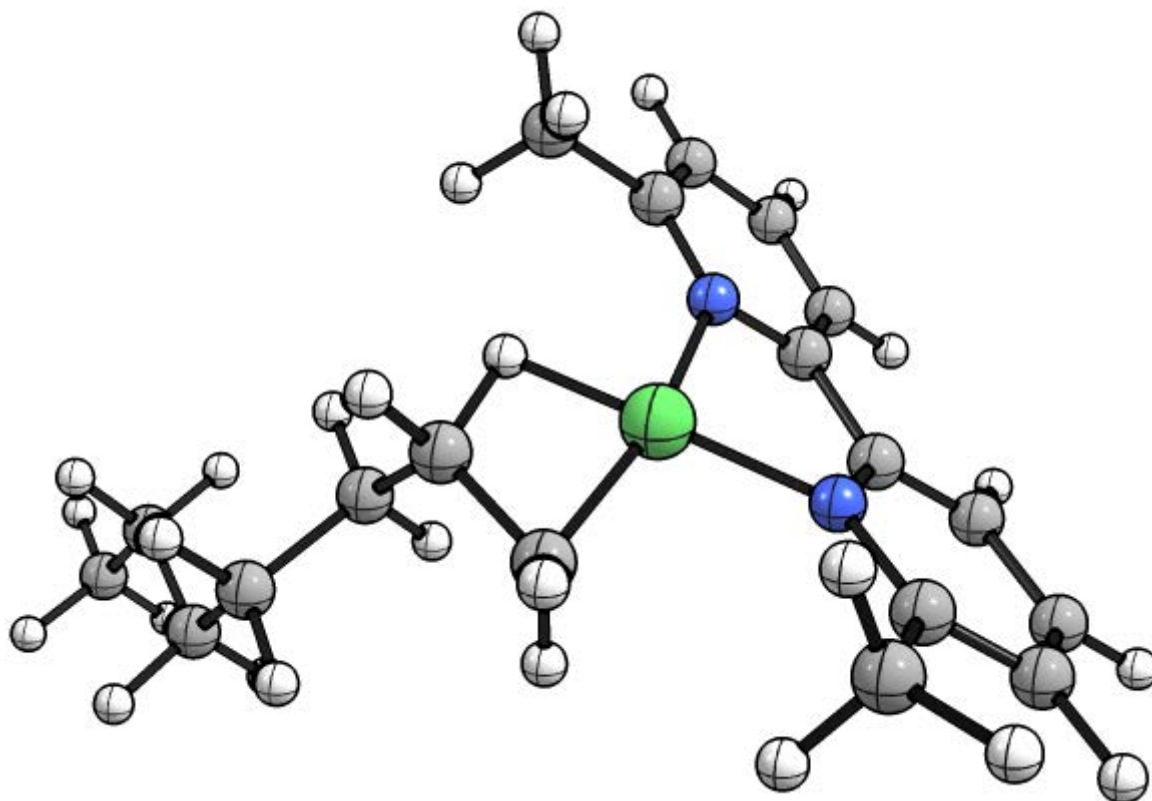

**DMF-solv**

|   |           |           |           |
|---|-----------|-----------|-----------|
| C | 2.89595   | -3.141887 | 0.941283  |
| O | 3.376187  | -2.829297 | 2.025198  |
| H | 2.677905  | -4.192206 | 0.681185  |
| N | 2.572806  | -2.289465 | -0.053816 |
| C | 2.009532  | -2.753378 | -1.30343  |
| H | 1.877228  | -3.837818 | -1.27455  |
| H | 1.033304  | -2.283713 | -1.474409 |
| H | 2.665351  | -2.496117 | -2.142811 |
| C | 2.819132  | -0.868458 | 0.067961  |
| H | 1.893836  | -0.309731 | -0.114391 |
| H | 3.183957  | -0.646819 | 1.070149  |
| H | 3.566776  | -0.547439 | -0.667338 |
| C | -3.411245 | -0.778077 | -2.576376 |
| O | -4.442079 | -0.156845 | -2.803131 |
| H | -2.632327 | -0.918683 | -3.346371 |
| N | -3.084718 | -1.362795 | -1.402795 |
| C | -1.823902 | -2.047769 | -1.213813 |
| H | -1.278089 | -2.092812 | -2.159777 |
| H | -1.20695  | -1.522849 | -0.473707 |
| H | -1.995895 | -3.070557 | -0.85949  |
| C | -3.977812 | -1.300464 | -0.264784 |
| H | -4.269807 | -2.312044 | 0.042289  |
| H | -3.48902  | -0.811246 | 0.584956  |
| H | -4.867491 | -0.737308 | -0.547651 |
| C | 1.483635  | -0.374315 | -3.649706 |
| O | 2.498797  | -0.709325 | -4.247842 |
| H | 0.529939  | -0.919262 | -3.764902 |
| N | 1.381355  | 0.665165  | -2.793081 |
| C | 0.124562  | 1.016594  | -2.168006 |
| H | -0.657833 | 0.32383   | -2.486496 |
| H | 0.211652  | 0.974391  | -1.075326 |
| H | -0.173823 | 2.033189  | -2.450569 |
| C | 2.513468  | 1.531089  | -2.53765  |
| H | 2.668532  | 1.639617  | -1.459467 |
| H | 3.401737  | 1.089481  | -2.989894 |
| H | 2.343006  | 2.525364  | -2.968362 |
| C | -2.177469 | -2.363857 | 2.580398  |
| O | -2.665857 | -1.339974 | 3.047388  |
| H | -2.765793 | -3.289668 | 2.459489  |
| N | -0.900255 | -2.508033 | 2.172844  |
| C | -0.413618 | -3.749346 | 1.608004  |
| H | -1.221106 | -4.48494  | 1.57388   |
| H | -0.043867 | -3.588516 | 0.588843  |
| H | 0.404378  | -4.150415 | 2.216887  |
| C | 0.029214  | -1.398766 | 2.245945  |
| H | 0.170769  | -0.943593 | 1.25802   |
| H | -0.364687 | -0.646832 | 2.93085   |
| H | 1.000709  | -1.752352 | 2.605518  |
| C | -1.75225  | 3.816955  | 0.730598  |
| O | -1.392045 | 4.364621  | 1.76741   |
| H | -1.670781 | 4.315014  | -0.250992 |
| N | -2.272174 | 2.576046  | 0.633792  |
| C | -2.743695 | 2.040352  | -0.626235 |
| H | -2.494004 | 2.722993  | -1.442112 |
| H | -2.274265 | 1.070452  | -0.818856 |
| H | -3.830113 | 1.895157  | -0.606475 |

|   |           |          |           |
|---|-----------|----------|-----------|
| C | -2.485614 | 1.757364 | 1.808945  |
| H | -3.557794 | 1.601284 | 1.97839   |
| H | -2.015643 | 0.776852 | 1.684804  |
| H | -2.054308 | 2.259003 | 2.675493  |
| C | 3.415998  | 2.415591 | 1.239548  |
| O | 3.889284  | 1.601425 | 2.024108  |
| H | 4.054944  | 3.057684 | 0.608536  |
| N | 2.100331  | 2.64012  | 1.031865  |
| C | 1.638939  | 3.707848 | 0.167396  |
| H | 2.488399  | 4.157822 | -0.352298 |
| H | 0.937816  | 3.316635 | -0.57828  |
| H | 1.124819  | 4.478499 | 0.752142  |
| C | 1.093426  | 1.924178 | 1.788708  |
| H | 0.534493  | 2.614481 | 2.430094  |
| H | 0.384192  | 1.444153 | 1.105671  |
| H | 1.584638  | 1.164992 | 2.397895  |

Energy = -1490.7033966

Zero-point correction = 0.634266 (Hartree/Particle)

Thermal correction to Gibbs Free Energy = 0.553409

Sum of electronic and zero-point Energies = -1490.069130

Sum of electronic and thermal Energies = -1490.026307

Sum of electronic and thermal Enthalpies = -1490.025363

Sum of electronic and thermal Free Energies = -1490.149987

G + ZVPE = -1489.515721

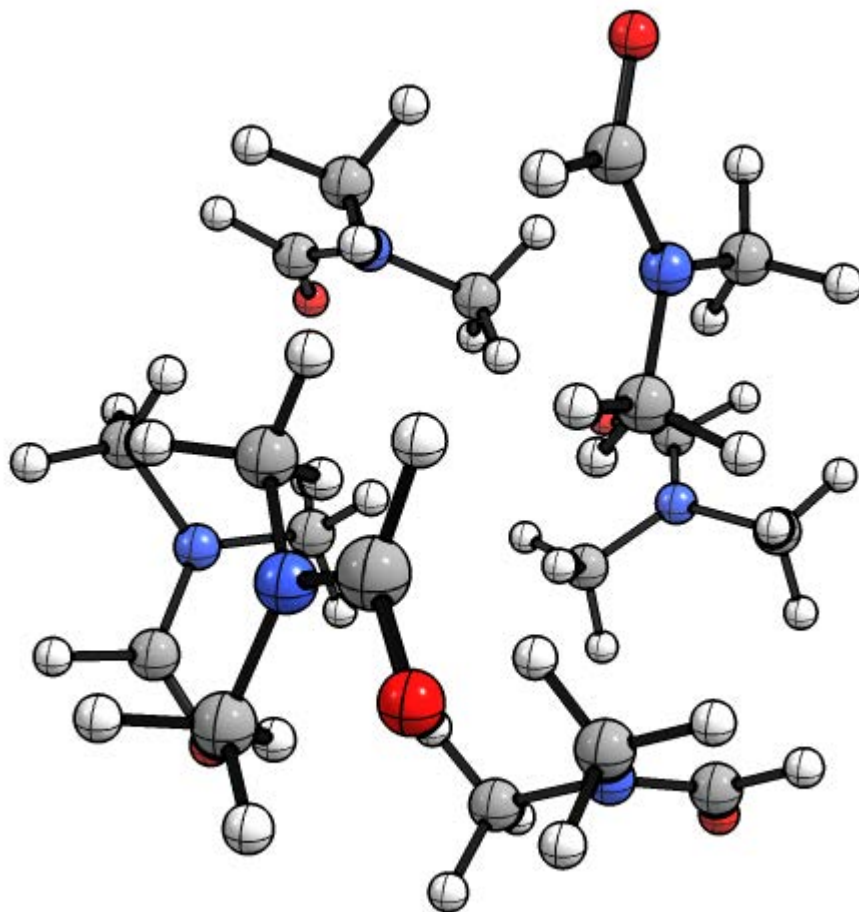

E<sub>1</sub>

|    |               |               |               |
|----|---------------|---------------|---------------|
| C  | 0.6360870824  | -3.7993062453 | -0.7758533011 |
| C  | 1.5926184711  | -3.2333264909 | -1.6070148554 |
| C  | 1.5277328045  | -1.8772239982 | -1.8959221709 |
| C  | 0.5090985725  | -1.1220662498 | -1.3216101737 |
| C  | -0.3614780472 | -2.990937303  | -0.2349211759 |
| C  | 0.3235558324  | 0.3306028427  | -1.5661463824 |
| C  | 1.252421325   | 1.1021963923  | -2.2560548718 |
| C  | 1.0052984147  | 2.4581340223  | -2.412104438  |
| H  | 1.7175964753  | 3.088024483   | -2.9354102228 |
| C  | -0.15834094   | 2.9960107594  | -1.8848225335 |
| C  | -1.0508608366 | 2.1720978252  | -1.1984757231 |
| H  | 0.6504124312  | -4.8593740031 | -0.5474833071 |
| H  | 2.3768971618  | -3.8464906683 | -2.0393792934 |
| H  | -0.3800166486 | 4.0524694162  | -1.9882118263 |
| N  | -0.7992966064 | 0.8612522808  | -1.0449031088 |
| N  | -0.3956754854 | -1.6753545332 | -0.4969225725 |
| C  | -2.308905696  | 2.7155453839  | -0.5931168986 |
| H  | -3.1853452865 | 2.1988300799  | -0.9949067362 |
| H  | -2.3187470402 | 2.5564559838  | 0.489140328   |
| H  | -2.410286387  | 3.7840526649  | -0.7973936504 |
| C  | -1.4516920456 | -3.531609327  | 0.6424830006  |
| H  | -1.3697895387 | -3.1238918308 | 1.6553611981  |
| H  | -2.43090415   | -3.2379280763 | 0.2514526296  |
| H  | -1.4049422926 | -4.6212159035 | 0.7059250124  |
| Ni | -1.6952893771 | -0.3640872971 | 0.3577096495  |
| C  | 0.6660997513  | 0.6691078432  | 1.7061324952  |
| H  | 1.1941025025  | -0.2076392538 | 1.3001322262  |
| C  | -0.7962147146 | 0.2996283308  | 1.967422565   |
| H  | 0.7210749272  | 1.4464277734  | 0.9307786351  |
| O  | -4.113292657  | 0.8044461243  | 1.4844661365  |
| C  | -3.4437771186 | 0.08397109    | 0.7928187756  |
| O  | -3.5804536102 | -0.839241707  | -0.0627119371 |
| H  | -1.3154051519 | 1.2032093576  | 2.3173327273  |
| H  | 2.2502408506  | -1.4279439935 | -2.5658065309 |
| H  | 2.165733611   | 0.6671498014  | -2.6420938667 |
| C  | 1.4466007854  | 1.1851527339  | 2.9223534997  |
| H  | 1.6411361681  | 0.3592960487  | 3.6196651847  |
| H  | 0.8105054249  | 1.8988368161  | 3.4648871056  |
| C  | 2.7761482234  | 1.8765733781  | 2.5943874607  |
| H  | 2.582691687   | 2.746720177   | 1.9494661088  |
| H  | 3.1834578644  | 2.2793471651  | 3.5305950606  |
| C  | 3.8538053685  | 0.9961948392  | 1.9373623562  |
| H  | 4.8394115995  | 1.4163837245  | 2.1741395712  |
| H  | 3.8324217717  | -0.0031182835 | 2.3933788285  |
| C  | 3.7538717406  | 0.8662818255  | 0.4146877118  |
| H  | 2.840119945   | 0.3515037577  | 0.1066969752  |
| H  | 3.7489909068  | 1.8556286175  | -0.0590501902 |
| C  | -0.908141299  | -0.7534297624 | 3.0767123763  |
| H  | -0.3000427389 | -1.6411185082 | 2.8449316109  |
| H  | -0.5523795228 | -0.3812233559 | 4.0485008314  |
| H  | -1.9435169921 | -1.0826912824 | 3.2257923659  |
| H  | 4.6071663838  | 0.306811595   | 0.0138814905  |



Energy = -2546.244042  
Zero-point correction = 0.442527 (Hartree/Particle)  
Thermal correction to Gibbs Free Energy = 0.384316  
Sum of electronic and zero-point Energies = -2545.801515  
Sum of electronic and thermal Energies = -2545.774994  
Sum of electronic and thermal Enthalpies = -2545.774050  
Sum of electronic and thermal Free Energies = -2545.859726  
G + ZVPE = -2545.417199  
Energy (DMF-6-31G(d)) = -2546.2762883  
Energy (DMF-def2-TZVP) = -2546.8589755

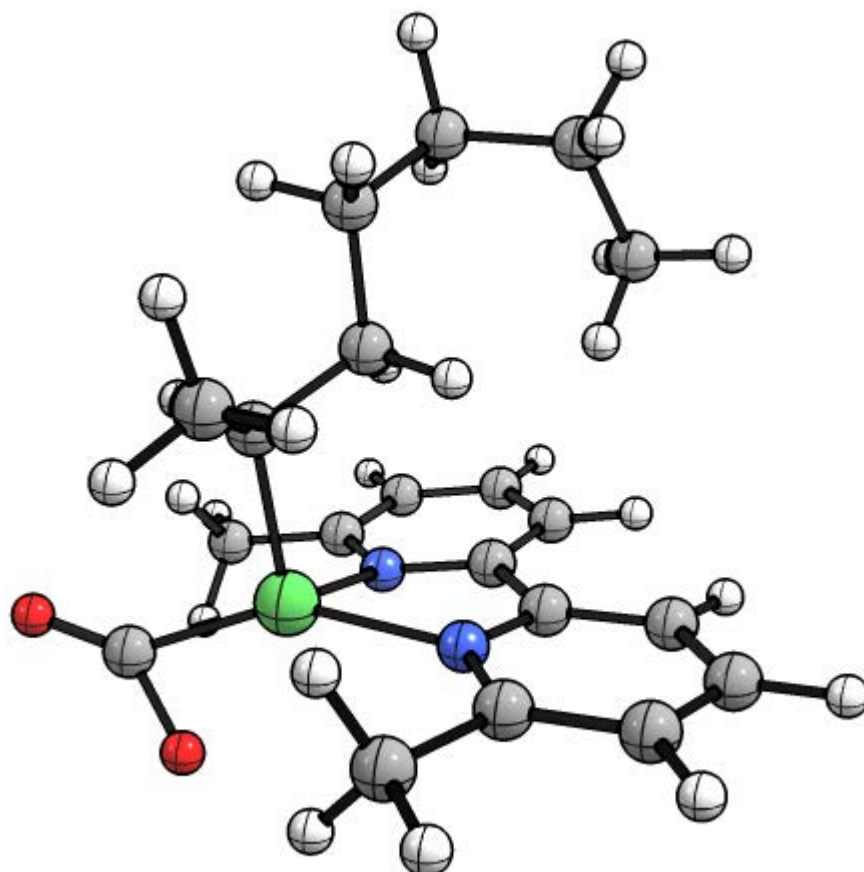

E<sub>1</sub>

|    |               |               |               |
|----|---------------|---------------|---------------|
| C  | 1.8313027755  | 3.6228989731  | 1.2285994221  |
| C  | 2.72649343    | 3.5534838931  | 0.1697046334  |
| C  | 2.8774770855  | 2.3578685199  | -0.5197589708 |
| C  | 2.1149566724  | 1.2620747989  | -0.1258057969 |
| C  | 1.1017785638  | 2.4883837507  | 1.5762707655  |
| C  | 2.1663924726  | -0.0640568849 | -0.7914640863 |
| C  | 2.8757905593  | -0.2856227114 | -1.9670819189 |
| C  | 2.838962294   | -1.5492464337 | -2.538153872  |
| H  | 3.3781585677  | -1.7512953184 | -3.4580365747 |
| C  | 2.0980857415  | -2.5451720143 | -1.9214707257 |
| C  | 1.4002351176  | -2.2605221396 | -0.7472115734 |
| H  | 1.6953630773  | 4.5432638333  | 1.7858409459  |
| H  | 3.3067734426  | 4.4245433474  | -0.1175101709 |
| H  | 2.0449408374  | -3.5418306358 | -2.3453861429 |
| N  | 1.4446151257  | -1.0347392598 | -0.1985520804 |
| N  | 1.2517244121  | 1.3414888512  | 0.8987796621  |
| C  | 0.5673047881  | -3.3009652269 | -0.0627766655 |
| H  | 0.9503357291  | -3.5055202241 | 0.9412946711  |
| H  | -0.4619348754 | -2.9512489902 | 0.0582675306  |
| H  | 0.5648597125  | -4.2346608411 | -0.6300026614 |
| C  | 0.1091150012  | 2.4700131334  | 2.7004946824  |
| H  | -0.8999773852 | 2.3049637841  | 2.3061483539  |
| H  | 0.33144281    | 1.6474976096  | 3.3882148014  |
| H  | 0.1154582699  | 3.4102298788  | 3.256369404   |
| Ni | 0.161255953   | -0.3376692956 | 1.2666495723  |
| C  | -1.1631470786 | 0.4320295042  | -1.1997263362 |
| H  | -0.4575325415 | 1.2747672175  | -1.1627039904 |
| C  | -1.4570429786 | -0.0558168182 | 0.2171800924  |
| H  | -2.0655723141 | 0.70506016    | 0.7365030879  |
| H  | -0.6505698938 | -0.361536166  | -1.7656600974 |
| O  | -1.2040828956 | -2.5049899339 | 2.6632564101  |
| C  | -0.3933048894 | -1.6384305532 | 2.4763330001  |
| O  | 0.6013795494  | -1.0989255439 | 3.0425854474  |
| H  | -2.0887618163 | -0.9522859137 | 0.1735743175  |
| H  | 3.5767208399  | 2.2903397162  | -1.3436434361 |
| H  | 3.4277143819  | 0.5139792285  | -2.4453720835 |
| C  | -2.3866597173 | 0.8779898456  | -2.0031609834 |
| H  | -2.8585318029 | 1.7250006276  | -1.4837414909 |
| H  | -3.1294991333 | 0.069262594   | -2.0037091417 |
| C  | -2.0878170234 | 1.285567554   | -3.4532058262 |
| H  | -1.7571471824 | 0.4018112174  | -4.0178435139 |
| H  | -3.0264262658 | 1.6082551805  | -3.9200242566 |
| C  | -1.0328822129 | 2.3988280449  | -3.6005569306 |
| H  | -1.2949010247 | 3.0532281534  | -4.4424753776 |
| H  | -1.0533303065 | 3.0382622379  | -2.7057817696 |
| C  | 0.3947907662  | 1.88772035    | -3.8233047889 |
| H  | 0.6443791536  | 1.137782823   | -3.0651518327 |
| H  | 0.4390634126  | 1.3680621046  | -4.7899177646 |
| C  | 1.4342586423  | 3.005842978   | -3.7912981084 |
| H  | 1.433179262   | 3.5080908226  | -2.8164357386 |
| H  | 2.4459998239  | 2.6221535955  | -3.9713255182 |
| H  | 1.227378527   | 3.7642667759  | -4.5553486149 |

Energy = -2546.2466858  
Zero-point correction = 0.442809 (Hartree/Particle)  
Thermal correction to Gibbs Free Energy = 0.384209  
Sum of electronic and zero-point Energies = -2545.803877  
Sum of electronic and thermal Energies = -2545.777517  
Sum of electronic and thermal Enthalpies = -2545.776573  
Sum of electronic and thermal Free Energies = -2545.862476  
G + ZVPE = -2545.419667  
Energy (DMF-6-31G(d)) = -2546.2796777  
Energy (DMF-def2-TZVP) = -2546.8634782

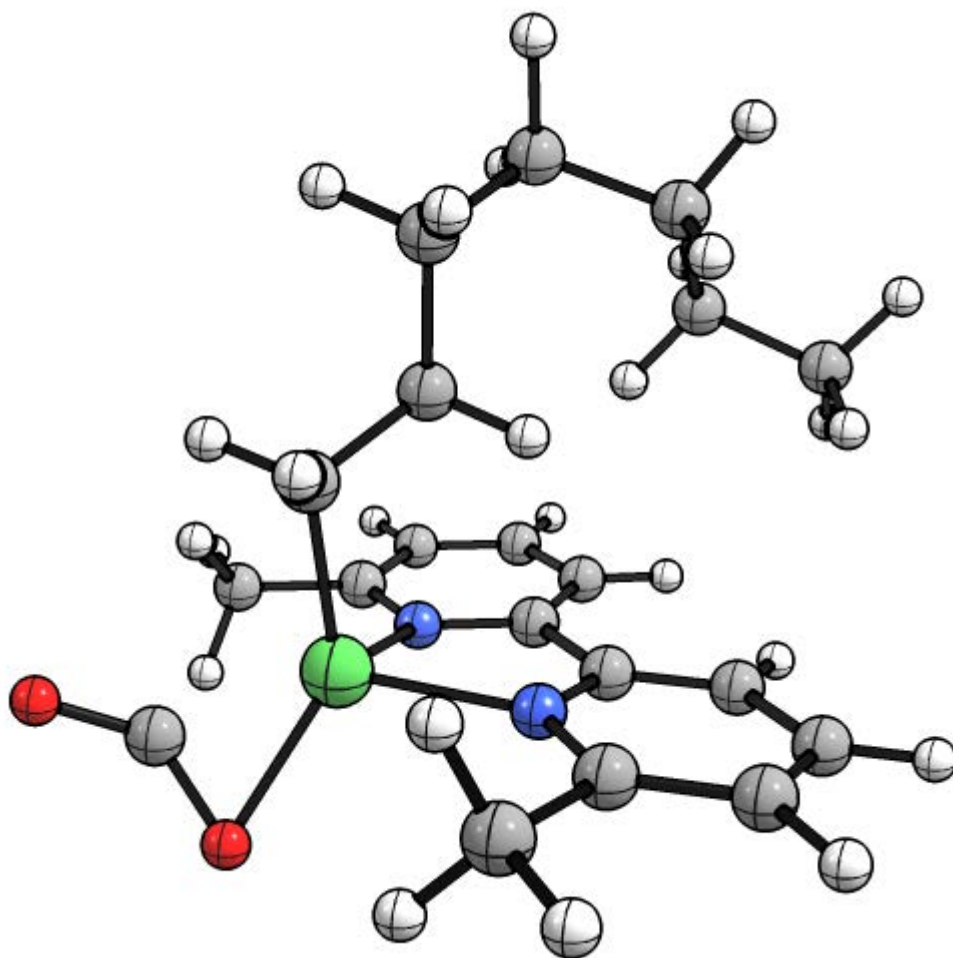

## E

|    |               |               |               |
|----|---------------|---------------|---------------|
| C  | -0.7260357546 | 3.4811792354  | -1.145998119  |
| C  | -1.7256918461 | 3.5348205572  | -0.1464506347 |
| C  | -2.1528041282 | 2.3755269958  | 0.4370087414  |
| C  | -1.5826248679 | 1.1379696162  | 0.0464172888  |
| C  | -0.1734147868 | 2.2648419702  | -1.4805072294 |
| C  | -2.0076942765 | -0.133842514  | 0.5077314452  |
| C  | -3.0462133589 | -0.3344646024 | 1.4497251494  |
| C  | -3.4806736494 | -1.5993294788 | 1.7254896229  |
| H  | -4.277483872  | -1.7662708531 | 2.4437711916  |
| C  | -2.8984599273 | -2.6887869857 | 1.0393676827  |
| C  | -1.855944091  | -2.4704798504 | 0.1649513159  |
| H  | -0.3908103165 | 4.3817015941  | -1.6479252929 |
| H  | -2.1610014601 | 4.4872080125  | 0.1401711848  |
| H  | -3.264046998  | -3.698030742  | 1.1906960526  |
| N  | -1.3646854726 | -1.2239250267 | -0.0725879906 |
| N  | -0.5589778566 | 1.1070799295  | -0.8859043778 |
| C  | -1.2566286245 | -3.6347530294 | -0.5708819932 |
| H  | -1.0944567471 | -3.3847567554 | -1.6222435485 |
| H  | -0.2910482896 | -3.9204348632 | -0.1444340914 |
| H  | -1.9242128623 | -4.4983458202 | -0.5120740953 |
| C  | 0.8968163122  | 2.1864366261  | -2.5359862291 |
| H  | 1.8804056075  | 1.9891383534  | -2.0919726864 |
| H  | 0.6812005823  | 1.3857878593  | -3.2518580668 |
| H  | 0.9675694449  | 3.127913554   | -3.0859314271 |
| Ni | 0.1654960842  | -0.6618314955 | -0.9690690444 |
| C  | 2.1748640789  | -0.9600179288 | -1.4422878027 |
| H  | 1.4854293968  | -0.0385418731 | -1.6481815755 |
| H  | 2.5427156963  | -1.1311668493 | -2.4600361972 |
| C  | 1.3582314938  | -2.0925675299 | -0.9258971469 |
| H  | 1.635857004   | -2.4386510343 | 0.0738450534  |
| H  | 1.2548242432  | -2.9285024416 | -1.6178167264 |
| C  | 3.2746075858  | -0.4086217436 | -0.5371948421 |
| H  | 3.5828286197  | 0.5849172719  | -0.8862901678 |
| H  | 2.8650901155  | -0.2735261919 | 0.4727147527  |
| C  | 4.4841141333  | -1.3421045531 | -0.4809623424 |
| H  | 4.136543942   | -2.3496544697 | -0.2208225448 |
| H  | 4.9284761801  | -1.4165625083 | -1.483819877  |
| C  | 5.5569165504  | -0.9071274264 | 0.5210705178  |
| H  | 6.3392397119  | -1.676938304  | 0.5577278388  |
| H  | 5.1169801754  | -0.8698194617 | 1.5278497771  |
| C  | 6.2088063592  | 0.4414973451  | 0.2073982092  |
| H  | 6.6097645663  | 0.4195442429  | -0.8153445409 |
| H  | 5.4508920751  | 1.2345558155  | 0.2250552148  |
| C  | 7.3245452823  | 0.7962370112  | 1.1888361577  |
| H  | 7.7743364211  | 1.7652706259  | 0.9497013586  |
| H  | 6.9406635056  | 0.8476950359  | 2.2142316531  |
| H  | 8.1202113771  | 0.0424375735  | 1.1701984614  |
| H  | -2.9358150136 | 2.397949713   | 1.186074797   |
| H  | -3.4978610352 | 0.519640184   | 1.9408604435  |

Energy = -2357.6921286  
Zero-point correction = 0.429645 (Hartree/Particle)  
Thermal correction to Gibbs Free Energy = 0.376739  
Sum of electronic and zero-point Energies = -2357.262483  
Sum of electronic and thermal Energies = -2357.240075  
Sum of electronic and thermal Enthalpies = -2357.239130  
Sum of electronic and thermal Free Energies = -2357.315390  
G + ZVPE = -2356.885745  
Energy (DMF-6-31G(d)) = -2357.7123047  
Energy (DMF-def2-TZVP) = -2358.2331129

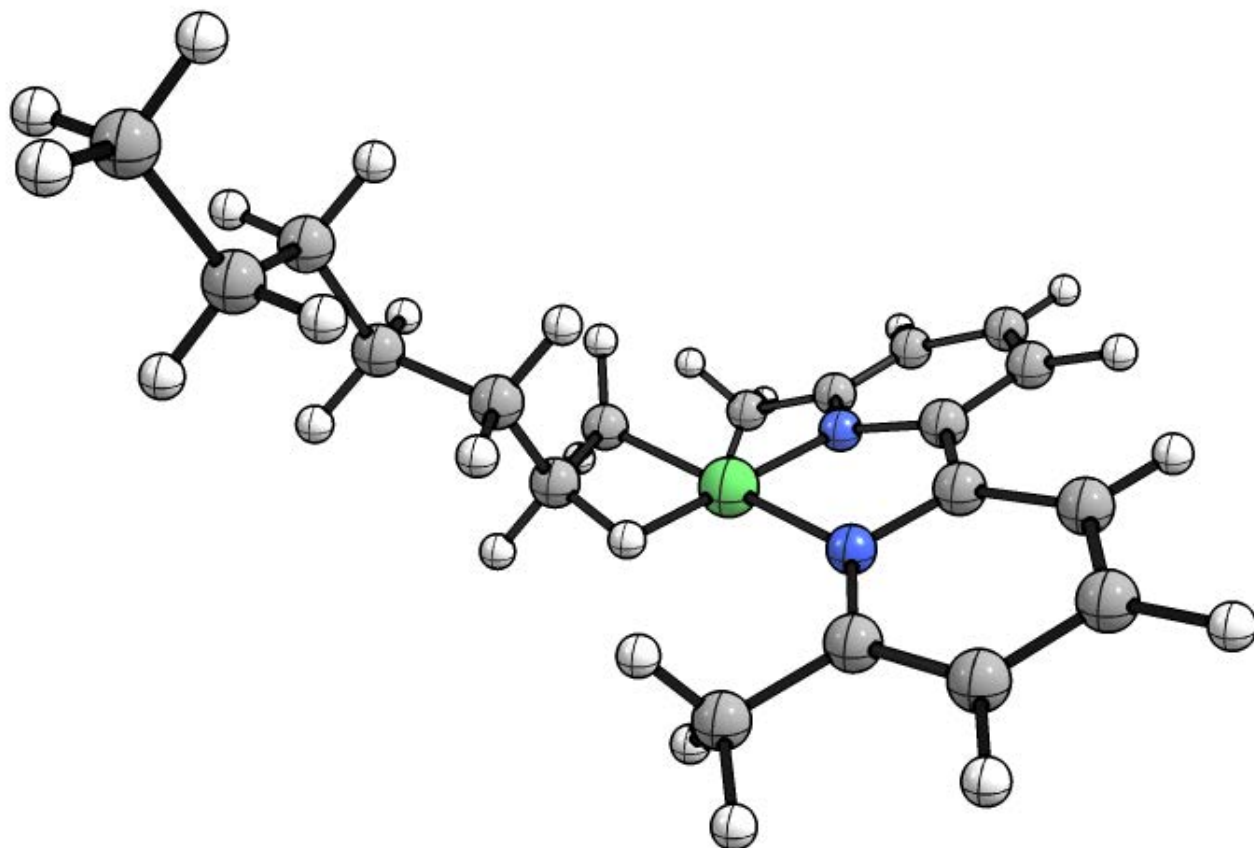

## E'

|    |               |               |               |
|----|---------------|---------------|---------------|
| C  | 4.1179444602  | -1.5515376245 | 1.2149474898  |
| C  | 4.2666204494  | -0.3742327291 | 1.9848109987  |
| C  | 3.4047026007  | 0.6686233758  | 1.789876773   |
| C  | 2.3677783861  | 0.5549308392  | 0.8304294818  |
| C  | 3.0810408079  | -1.6374708758 | 0.3121796198  |
| C  | 1.479382044   | 1.5995584806  | 0.4656592981  |
| C  | 1.4701801013  | 2.8880519542  | 1.053625479   |
| C  | 0.6915359078  | 3.8739264706  | 0.5173932903  |
| H  | 0.6764616461  | 4.8664303534  | 0.9569197057  |
| C  | -0.0637778684 | 3.5964559672  | -0.6456351638 |
| C  | -0.0790392332 | 2.3201698554  | -1.1638046251 |
| H  | 4.8063898753  | -2.3813912056 | 1.327428133   |
| H  | 5.0698078509  | -0.2946303193 | 2.7109264985  |
| H  | -0.6243520516 | 4.3803382271  | -1.1423683151 |
| N  | 0.6185627592  | 1.3044468192  | -0.5873360681 |
| N  | 2.1939933367  | -0.6276720148 | 0.1314734509  |
| C  | -0.8445272701 | 2.0400954038  | -2.4274413004 |
| H  | -0.2834143202 | 1.3607426987  | -3.0741505235 |
| H  | -1.8148521373 | 1.5794909858  | -2.2230872992 |
| H  | -1.0248658955 | 2.9727160562  | -2.9684367393 |
| C  | 2.8898835792  | -2.8822445111 | -0.511863557  |
| H  | 2.0274778081  | -3.4622119135 | -0.160831693  |
| H  | 2.7225582624  | -2.631504469  | -1.5650101473 |
| H  | 3.7679818447  | -3.5294891588 | -0.4484894352 |
| Ni | 0.5356085198  | -0.5316310797 | -0.8323936421 |
| C  | -0.6068283881 | -2.2228026172 | -1.2016691819 |
| H  | 0.521559815   | -2.154835512  | -0.9251054968 |
| H  | -0.5697210615 | -2.8171384303 | -2.116968644  |
| C  | -1.2175440944 | -0.8676399574 | -1.3512163686 |
| H  | -1.5081695933 | -0.6587075137 | -2.3839170732 |
| C  | -2.3070269811 | -0.5010610986 | -0.359973106  |
| H  | -1.9761989836 | -0.7633442269 | 0.6539232722  |
| H  | -2.4506063607 | 0.5882213299  | -0.3494208371 |
| C  | -3.6478818286 | -1.1822033592 | -0.6583898961 |
| H  | -3.9092404396 | -0.9945376274 | -1.7089428123 |
| H  | -3.5265999432 | -2.2713866157 | -0.565013137  |
| C  | -4.8046879558 | -0.7222996159 | 0.2326636764  |
| H  | -5.7280118992 | -1.2145181084 | -0.1026594837 |
| H  | -4.9643460357 | 0.3562878531  | 0.0902765432  |
| C  | -4.6083969022 | -1.0055250756 | 1.7234197012  |
| H  | -4.3735967276 | -2.0700675066 | 1.8618705655  |
| H  | -3.7414636251 | -0.4476985271 | 2.0975868687  |
| C  | -5.8375414035 | -0.6396298826 | 2.5540340619  |
| H  | -5.6740462183 | -0.831429208  | 3.6195267803  |
| H  | -6.0838622796 | 0.4223376688  | 2.43903291    |
| H  | -6.7129666912 | -1.2186154685 | 2.2377046129  |
| H  | -0.9968164931 | -2.8234655387 | -0.374400527  |
| H  | 3.5250942315  | 1.5900222952  | 2.3480095842  |
| H  | 2.0875173952  | 3.0867411572  | 1.9223692777  |

Energy = -2357.6918178  
Zero-point correction = 0.428648 (Hartree/Particle)  
Thermal correction to Gibbs Free Energy = 0.375042  
Sum of electronic and zero-point Energies = -2357.263170  
Sum of electronic and thermal Energies = -2357.240428  
Sum of electronic and thermal Enthalpies = -2357.239483  
Sum of electronic and thermal Free Energies = -2357.316776  
G + ZVPE = -2356.888128  
Energy (DMF-6-31G(d)) = -2357.7116596  
Energy (DMF-def2-TZVP) = -2358.2320566

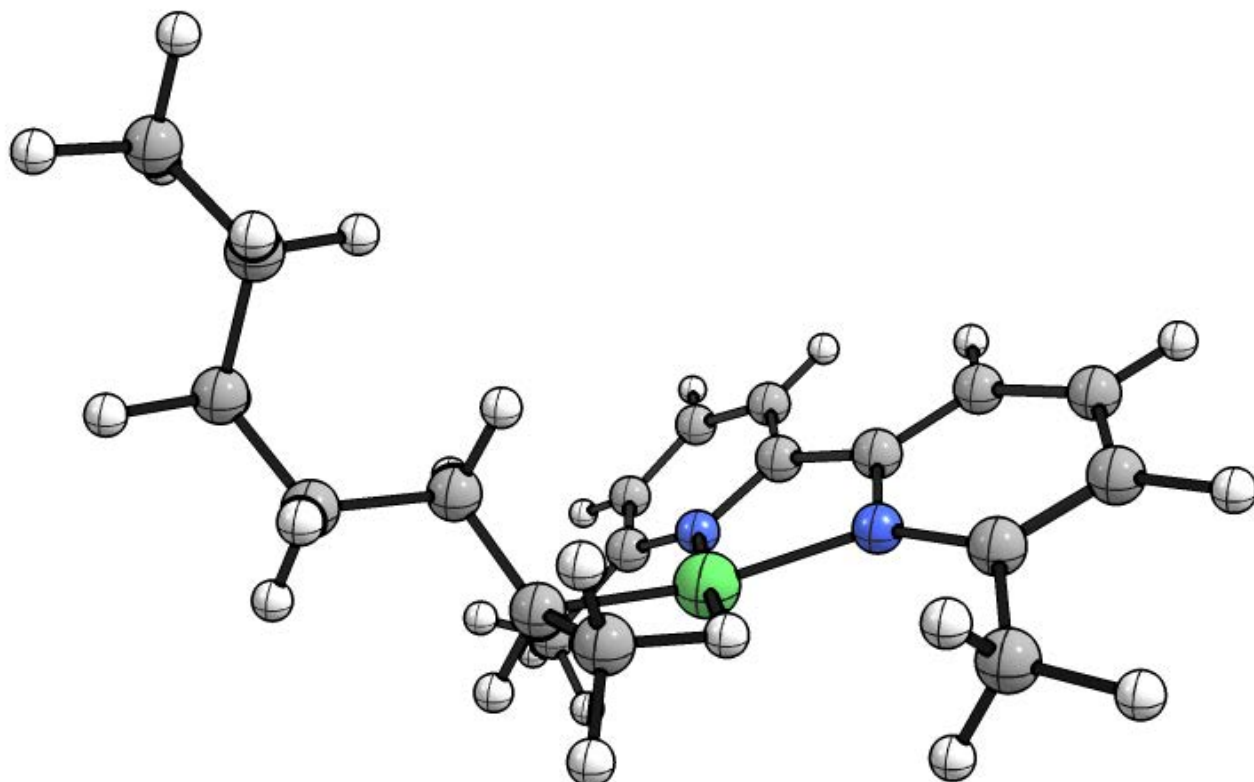

**F**

|    |               |               |               |
|----|---------------|---------------|---------------|
| C  | -3.9096852631 | 3.0560790657  | 0.425216062   |
| C  | -5.024491817  | 2.1858376571  | 0.4084172831  |
| C  | -4.8294183463 | 0.8428040804  | 0.2251539535  |
| C  | -3.5196641005 | 0.3415105251  | 0.050139986   |
| C  | -2.6486445486 | 2.5365997957  | 0.2583536939  |
| C  | -3.2008841391 | -1.043258984  | -0.1237943842 |
| C  | -4.1529535184 | -2.0585706031 | -0.3713177952 |
| C  | -3.7386520528 | -3.354205719  | -0.5298911421 |
| H  | -4.4604530886 | -4.1409404514 | -0.7260966915 |
| C  | -2.3607981801 | -3.6610990266 | -0.4480495458 |
| C  | -1.4597317565 | -2.6490872919 | -0.2183489463 |
| H  | -4.0403790487 | 4.123817375   | 0.5616759883  |
| H  | -6.0254910316 | 2.579950223   | 0.5529174025  |
| H  | -2.011652183  | -4.681746099  | -0.5573146099 |
| N  | -1.8612875184 | -1.3604506509 | -0.043348462  |
| N  | -2.4438260991 | 1.205866592   | 0.0550143393  |
| C  | 0.0171587986  | -2.8994277542 | -0.11006983   |
| H  | 0.5694309143  | -2.322208362  | -0.857967026  |
| H  | 0.3851557842  | -2.5845606288 | 0.8742633611  |
| H  | 0.2477960474  | -3.9596297281 | -0.2386711876 |
| C  | -1.4191449512 | 3.3987496115  | 0.2518286845  |
| H  | -0.70120093   | 3.0652680673  | 1.0075179238  |
| H  | -0.9168255041 | 3.3367209332  | -0.7214595027 |
| H  | -1.670286469  | 4.445104695   | 0.4408884499  |
| Ni | -0.7407438534 | 0.2461981659  | 0.0393378917  |
| O  | 1.0731145743  | 0.0507458421  | -0.8412612131 |
| O  | 0.7981936027  | 1.1054605878  | 1.0518143116  |
| C  | 1.5738509082  | 0.6813098962  | 0.1415988282  |
| C  | 3.8676929439  | -0.3017854008 | -0.2344715148 |
| H  | 3.5644827918  | -1.1698846048 | 0.3641308552  |
| H  | 3.6049245281  | -0.5338266132 | -1.272520692  |
| C  | 3.0583006447  | 0.9183692957  | 0.2157341375  |
| H  | 3.3113583766  | 1.2146015119  | 1.238232161   |
| H  | 3.2786062148  | 1.776021718   | -0.4326225795 |
| H  | -5.6726339476 | 0.16177781    | 0.2412950551  |
| H  | -5.2033995762 | -1.8060457047 | -0.4596036695 |
| C  | 5.3803640968  | -0.1073566893 | -0.1060148571 |
| H  | 5.6338483709  | 0.0594745298  | 0.9492928686  |
| H  | 5.87787404    | -1.04267825   | -0.3968450694 |
| C  | 5.9356743402  | 1.0345433189  | -0.9628511601 |
| H  | 5.6020314057  | 2.0006433862  | -0.5598488943 |
| H  | 5.510233946   | 0.9586706314  | -1.9730840543 |
| C  | 7.463818298   | 1.0451118939  | -1.066775174  |
| H  | 7.8015505971  | 0.1115947955  | -1.5394046542 |
| H  | 7.7682185444  | 1.8576921856  | -1.740280168  |
| C  | 8.1840742905  | 1.2170441118  | 0.2723542552  |
| H  | 7.9572214201  | 0.3666119142  | 0.927022368   |
| H  | 7.7937080836  | 2.1095434463  | 0.7806330299  |
| C  | 9.6985532757  | 1.3382947687  | 0.1118453992  |
| H  | 9.9603228141  | 2.2082951403  | -0.5014478286 |
| H  | 10.197272521  | 1.4473033892  | 1.0804078641  |
| H  | 10.1128119695 | 0.4505735511  | -0.380344921  |



Energy = -2546.2769136  
Zero-point correction = 0.443668 (Hartree/Particle)  
Thermal correction to Gibbs Free Energy = 0.383887  
Sum of electronic and zero-point Energies = -2545.833245  
Sum of electronic and thermal Energies = -2545.806932  
Sum of electronic and thermal Enthalpies = -2545.805988  
Sum of electronic and thermal Free Energies = -2545.893027  
G + ZVPE = -2545.449359  
Energy (DMF-6-31G(d)) = -2546.3100179  
Energy (DMF-def2-TZVP) = -2546.9050784

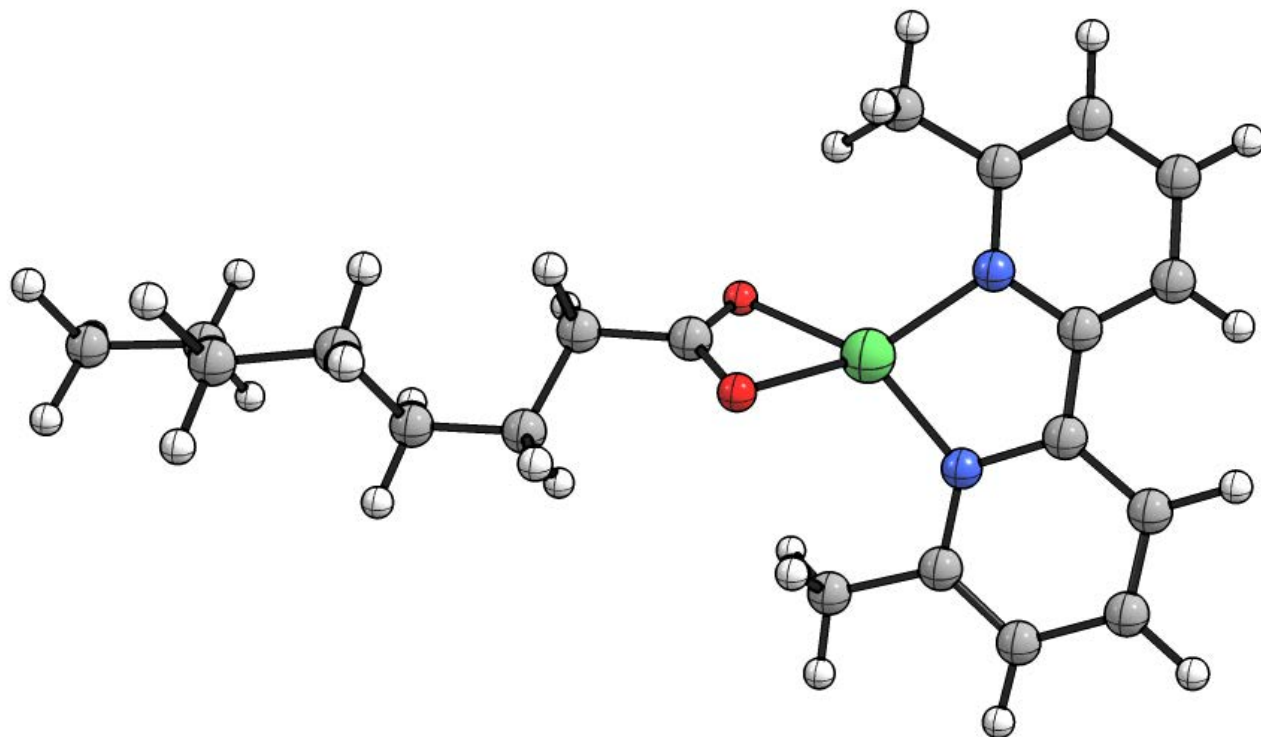

## F'

|    |               |               |               |
|----|---------------|---------------|---------------|
| C  | -4.2433939309 | 2.8407678205  | 0.9677442215  |
| C  | -5.2347431844 | 1.9143888725  | 0.5676938649  |
| C  | -4.8515068981 | 0.690131736   | 0.0766879398  |
| C  | -3.4835941923 | 0.3770136937  | -0.0193713533 |
| C  | -2.9189775517 | 2.5008547494  | 0.8599210811  |
| C  | -2.9394445174 | -0.8608236392 | -0.5115152687 |
| C  | -3.698295749  | -1.9577804754 | -0.9618742983 |
| C  | -3.0527520362 | -3.0878040698 | -1.4018731119 |
| H  | -3.6223974378 | -3.9435686326 | -1.7507547269 |
| C  | -1.6468775569 | -3.1300672303 | -1.3971239032 |
| C  | -0.9412455556 | -2.0325449232 | -0.9501026091 |
| H  | -4.5184703434 | 3.8153825023  | 1.3562681982  |
| H  | -6.286127755  | 2.1703328176  | 0.6480886053  |
| H  | -1.1144167312 | -4.0100710781 | -1.7400346423 |
| N  | -1.571420488  | -0.9152696637 | -0.5123369178 |
| N  | -2.5300013835 | 1.2849182997  | 0.3763758969  |
| C  | 0.5585983522  | -1.9930136639 | -0.9270960872 |
| H  | 0.9238367566  | -1.1993366202 | -1.588396871  |
| H  | 0.9237838328  | -1.7702734872 | 0.0805893192  |
| H  | 0.9872079082  | -2.941415738  | -1.2598897418 |
| C  | -1.7907370816 | 3.4086915335  | 1.2531376459  |
| H  | -1.2047219385 | 2.9596889223  | 2.0652534934  |
| H  | -1.111624273  | 3.5604068304  | 0.4050306885  |
| H  | -2.1516270645 | 4.3837674767  | 1.5885849866  |
| Ni | -0.7400622255 | 0.7176522999  | 0.1531255674  |
| O  | 0.871946178   | 1.6482186238  | -0.6577247149 |
| O  | 0.9786096444  | 0.5175188802  | 1.2105622966  |
| C  | 1.5571820448  | 1.2154910934  | 0.3214460263  |
| C  | 3.7734853284  | 0.2250868589  | -0.1767908092 |
| H  | 4.8362793117  | 0.2942889865  | 0.0891404986  |
| H  | 3.3855488511  | -0.6696701225 | 0.3271627095  |
| C  | 3.0472851429  | 1.4581035335  | 0.408302675   |
| H  | 3.2841240643  | 1.4927844645  | 1.4772341215  |
| H  | -5.5978929374 | -0.0305422322 | -0.238625776  |
| H  | -4.7810360053 | -1.9083763199 | -0.9573265552 |
| C  | 3.6358153442  | 0.0596918752  | -1.6924860431 |
| H  | 2.5933255915  | 0.2329687936  | -1.9830625818 |
| H  | 4.2236765079  | 0.8322515466  | -2.2053343527 |
| C  | 4.0973580456  | -1.3179730056 | -2.1690748454 |
| H  | 3.4923975698  | -2.0920517441 | -1.674657916  |
| H  | 5.1322686216  | -1.4812570782 | -1.838772906  |
| C  | 4.0184241004  | -1.5120020844 | -3.6869105935 |
| H  | 4.6111424627  | -0.7306272675 | -4.1812225503 |
| H  | 4.4925490119  | -2.4666667205 | -3.9467574017 |
| C  | 2.5923352558  | -1.4976774235 | -4.2390377684 |
| H  | 2.099470967   | -0.5345903604 | -4.0693541364 |
| H  | 1.9802630075  | -2.2721066254 | -3.7613385782 |
| C  | 3.4594155566  | 2.7696554623  | -0.2573191202 |
| H  | 4.5481813558  | 2.8867874983  | -0.2241844032 |
| H  | 3.1346020748  | 2.80003662    | -1.3001172669 |
| H  | 3.0086090916  | 3.6259909555  | 0.253964831   |
| H  | 2.5854827171  | -1.6858497511 | -5.3176464363 |

Energy = -2546.2970471  
Zero-point correction = 0.444318 (Hartree/Particle)  
Thermal correction to Gibbs Free Energy = 0.386390  
Sum of electronic and zero-point Energies = -2545.852730  
Sum of electronic and thermal Energies = -2545.826678  
Sum of electronic and thermal Enthalpies = -2545.825734  
Sum of electronic and thermal Free Energies = -2545.910657  
G + ZVPE = -2545.466339  
Energy (DMF-6-31G(d)) = -2546.3192526  
Energy (DMF-def2-TZVP) = -2546.9081615

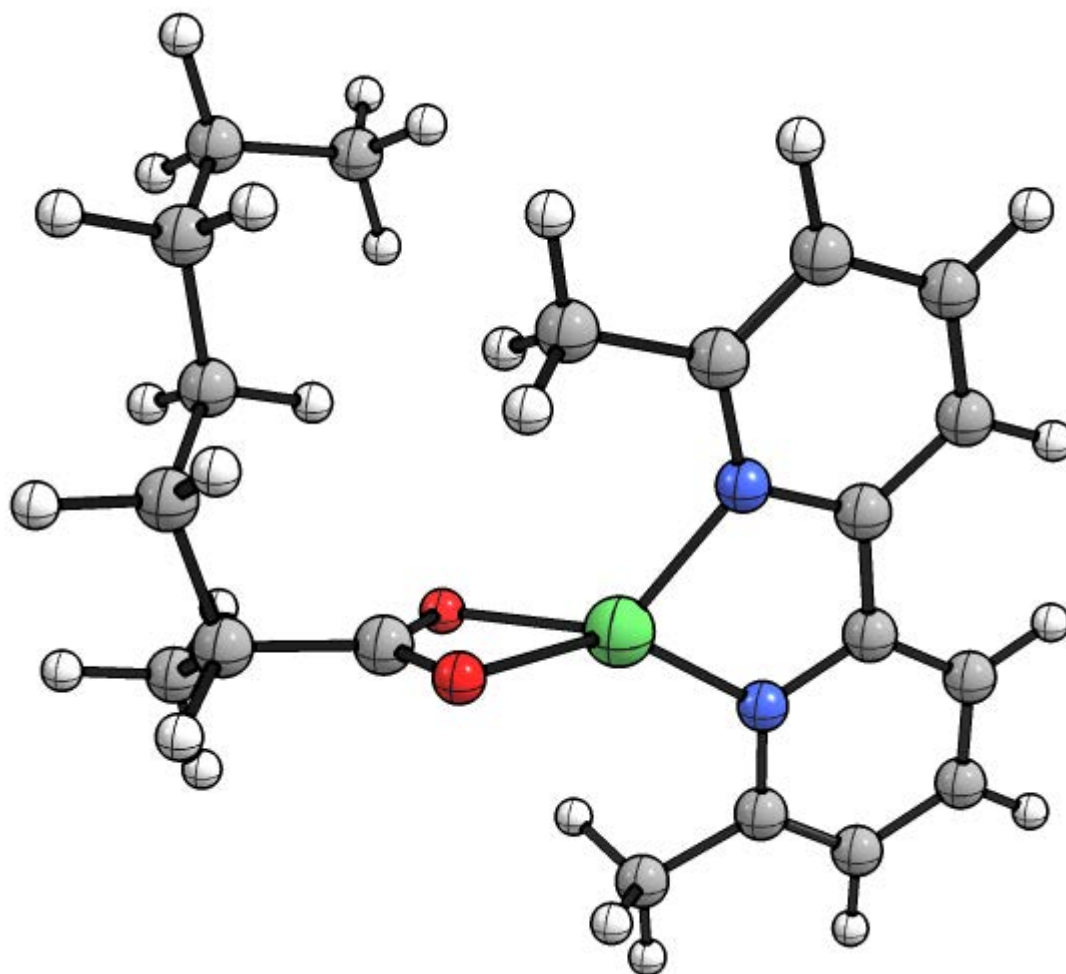

TS<sub>B-C</sub>

|    |           |           |           |
|----|-----------|-----------|-----------|
| C  | 2.417303  | -3.388556 | 0.379678  |
| C  | 2.606415  | -2.931363 | 1.672388  |
| C  | 2.350531  | -1.595769 | 1.962475  |
| C  | 1.885696  | -0.775214 | 0.948657  |
| C  | 1.920011  | -2.527738 | -0.600957 |
| C  | 1.731104  | 0.692959  | 1.084308  |
| C  | 2.123258  | 1.415544  | 2.198823  |
| C  | 2.096764  | 2.805621  | 2.131182  |
| H  | 2.395211  | 3.399668  | 2.988483  |
| C  | 1.737994  | 3.416841  | 0.94258   |
| C  | 1.338852  | 2.636637  | -0.144546 |
| H  | 2.644913  | -4.415066 | 0.116212  |
| H  | 2.971465  | -3.599654 | 2.444973  |
| H  | 1.772015  | 4.495709  | 0.836571  |
| N  | 1.280483  | 1.298597  | -0.040432 |
| N  | 1.634457  | -1.245549 | -0.300545 |
| C  | 1.02736   | 3.277085  | -1.467016 |
| H  | 0.113479  | 3.87876   | -1.424938 |
| H  | 1.843605  | 3.949316  | -1.747794 |
| H  | 0.925271  | 2.524829  | -2.25075  |
| C  | 1.706216  | -3.014481 | -2.003106 |
| H  | 1.977821  | -2.24569  | -2.729659 |
| H  | 2.305476  | -3.907863 | -2.192758 |
| H  | 0.654129  | -3.271616 | -2.165659 |
| Ni | 0.444685  | -0.039869 | -1.179969 |
| C  | -1.072953 | 0.398266  | -2.478141 |
| H  | -0.013913 | -1.131548 | -1.98509  |
| H  | -0.640106 | 0.99221   | -3.281371 |
| C  | -1.275556 | 0.941737  | -1.221635 |
| H  | -1.072721 | 1.997663  | -1.072462 |
| C  | -2.198425 | 0.317521  | -0.209253 |
| H  | -2.279356 | -0.758343 | -0.401948 |
| H  | -1.775422 | 0.432065  | 0.799006  |
| C  | -3.591477 | 0.965628  | -0.245196 |
| H  | -3.482676 | 2.049424  | -0.111238 |
| H  | -4.024865 | 0.815759  | -1.242572 |
| C  | -4.545488 | 0.417722  | 0.819946  |
| H  | -5.481868 | 0.987132  | 0.769309  |
| H  | -4.125699 | 0.606622  | 1.818133  |
| C  | -4.864379 | -1.072445 | 0.677016  |
| H  | -5.212291 | -1.269956 | -0.345995 |
| H  | -3.951576 | -1.666728 | 0.814406  |
| C  | -5.918461 | -1.544544 | 1.676866  |
| H  | -6.120138 | -2.614018 | 1.56421   |
| H  | -5.589304 | -1.371458 | 2.707675  |
| H  | -6.863308 | -1.008884 | 1.534979  |
| H  | -1.664754 | -0.446488 | -2.816688 |
| H  | 2.520985  | -1.209442 | 2.959479  |
| H  | 2.469272  | 0.919883  | 3.097024  |

Energy = -2357.5119149  
Zero-point correction = 0.427573 (Hartree/Particle)  
Thermal correction to Gibbs Free Energy = 0.374261  
Sum of electronic and zero-point Energies = -2357.084342  
Sum of electronic and thermal Energies = -2357.061769  
Sum of electronic and thermal Enthalpies = -2357.060825  
Sum of electronic and thermal Free Energies = -2357.137654  
G + ZVPE = -2356.710081  
Energy (DMF-6-31G(d)) = -2357.5890983  
Energy (DMF-def2-TZVP) = -2358.1060002

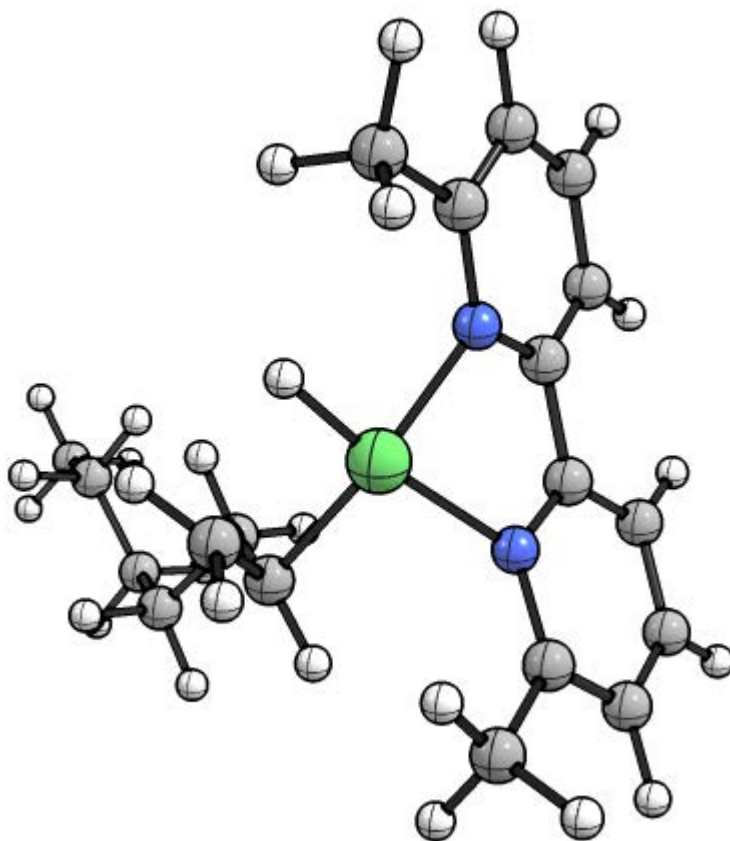

**TSC-D**

|    |           |           |           |
|----|-----------|-----------|-----------|
| C  | -0.689966 | 3.825359  | 0.302263  |
| C  | -0.643763 | 3.491315  | 1.644667  |
| C  | -0.850363 | 2.168875  | 2.020008  |
| C  | -1.070671 | 1.22392   | 1.031347  |
| C  | -0.891527 | 2.832495  | -0.658299 |
| C  | -1.445254 | -0.183576 | 1.316032  |
| C  | -1.645651 | -0.687817 | 2.590661  |
| C  | -2.159863 | -1.974471 | 2.722494  |
| H  | -2.325635 | -2.397843 | 3.707443  |
| C  | -2.50042  | -2.686249 | 1.585566  |
| C  | -2.25773  | -2.136208 | 0.32506   |
| H  | -0.567963 | 4.853859  | -0.017489 |
| H  | -0.471662 | 4.253352  | 2.397311  |
| H  | -2.962105 | -3.664898 | 1.657672  |
| N  | -1.682732 | -0.927033 | 0.20846   |
| N  | -1.05236  | 1.547081  | -0.287159 |
| C  | -2.682119 | -2.866213 | -0.916035 |
| H  | -2.621518 | -2.21925  | -1.791642 |
| H  | -2.066951 | -3.754739 | -1.090571 |
| H  | -3.716837 | -3.203451 | -0.804183 |
| C  | -0.937773 | 3.182133  | -2.115734 |
| H  | -0.001102 | 2.903216  | -2.610157 |
| H  | -1.751382 | 2.655339  | -2.61978  |
| H  | -1.082576 | 4.256594  | -2.246788 |
| Ni | -0.803931 | -0.056454 | -1.314187 |
| C  | 0.964234  | -0.715361 | -1.960219 |
| H  | -0.368055 | 0.721577  | -2.421033 |
| H  | 1.353579  | -0.237685 | -2.855726 |
| C  | -0.020715 | -1.693819 | -2.087936 |
| H  | -0.063992 | -2.489038 | -1.347744 |
| H  | -0.395435 | -1.951268 | -3.076231 |
| C  | 1.873455  | -0.626268 | -0.761211 |
| H  | 2.065678  | 0.426938  | -0.524646 |
| H  | 1.388435  | -1.073868 | 0.117121  |
| C  | 3.204646  | -1.347791 | -1.031119 |
| H  | 2.989432  | -2.378925 | -1.335715 |
| H  | 3.707934  | -0.867451 | -1.880327 |
| C  | 4.139166  | -1.359525 | 0.181839  |
| H  | 5.018046  | -1.966189 | -0.069415 |
| H  | 3.644172  | -1.871816 | 1.019176  |
| C  | 4.608944  | 0.023674  | 0.638273  |
| H  | 5.05331   | 0.552636  | -0.21548  |
| H  | 3.749756  | 0.626045  | 0.963001  |
| C  | 5.622854  | -0.05388  | 1.778394  |
| H  | 5.946095  | 0.943262  | 2.092351  |
| H  | 5.195205  | -0.559072 | 2.651839  |
| H  | 6.513752  | -0.613717 | 1.47398   |
| H  | -0.849479 | 1.894114  | 3.067136  |
| H  | -1.429905 | -0.096896 | 3.471706  |

Energy = -2357.5131261  
Zero-point correction = 0.427925 (Hartree/Particle)  
Thermal correction to Gibbs Free Energy = 0.375291  
Sum of electronic and zero-point Energies = -2357.085201  
Sum of electronic and thermal Energies = -2357.062834  
Sum of electronic and thermal Enthalpies = -2357.061890  
Sum of electronic and thermal Free Energies = -2357.137835  
G + ZVPE = -2356.709910  
Energy (DMF-6-31G(d)) = -2357.5901986  
Energy (DMF-def2-TZVP) = -2358.1042793

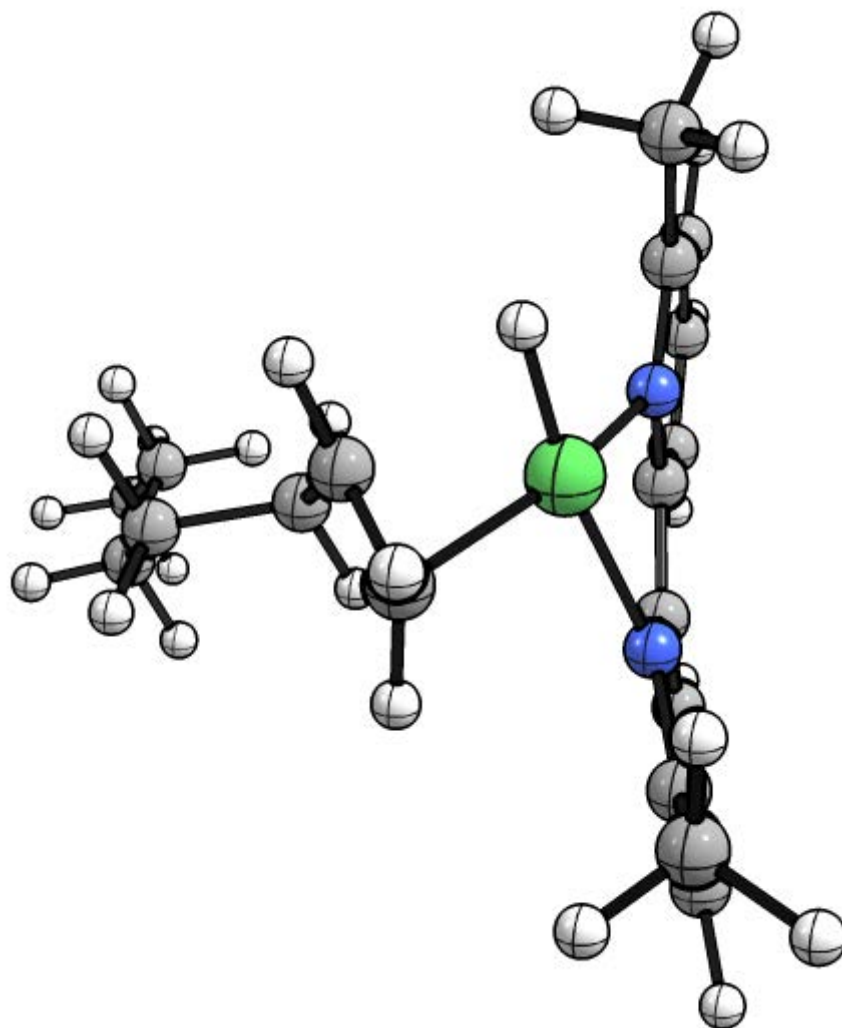

**TSE'I-F'I**

|    |               |               |               |
|----|---------------|---------------|---------------|
| C  | 3.1767261826  | -0.4416226583 | -1.704838406  |
| C  | 3.7018604622  | 0.3892574423  | -0.7260100657 |
| C  | 2.846396958   | 1.212924451   | -0.0054511069 |
| C  | 1.4862041424  | 1.166292183   | -0.2898603729 |
| C  | 1.8003212893  | -0.4519130154 | -1.9338646218 |
| C  | 0.4768156512  | 2.0054291165  | 0.4064198168  |
| C  | 0.8173358295  | 3.1113862015  | 1.1753784051  |
| C  | -0.2005184761 | 3.8458669308  | 1.7686324502  |
| H  | 0.032607495   | 4.7112593645  | 2.3808897868  |
| C  | -1.5162668811 | 3.4685689588  | 1.5524167229  |
| C  | -1.7980531528 | 2.3566606052  | 0.7563381695  |
| H  | 3.819606234   | -1.0910742297 | -2.2888266129 |
| H  | 4.7676977624  | 0.3940673187  | -0.5212913605 |
| H  | -2.3351185188 | 4.0323261502  | 1.9854647568  |
| N  | -0.8046795919 | 1.6262127171  | 0.2164230326  |
| N  | 0.9775206356  | 0.3385750845  | -1.2225792414 |
| C  | -3.2061186569 | 1.9587801563  | 0.4406198211  |
| H  | -3.394655576  | 0.9023536834  | 0.6438383128  |
| H  | -3.9179423115 | 2.5691068302  | 1.0016434328  |
| H  | -3.4024043456 | 2.0910678715  | -0.6285213923 |
| C  | 1.1676441983  | -1.3441942682 | -2.9577018193 |
| H  | 1.9253149414  | -1.8448548574 | -3.56535902   |
| H  | 0.5347356043  | -2.0965265346 | -2.4764890921 |
| H  | 0.502114669   | -0.7686759028 | -3.6063074249 |
| Ni | -0.9766021983 | -0.0599382037 | -0.8528945255 |
| C  | -1.7297205203 | -1.5355890604 | 0.504610516   |
| H  | -2.3705209767 | -1.0356724095 | 1.2394436455  |
| O  | -3.7657185268 | -0.8069175442 | -0.9819580079 |
| C  | -2.5795069623 | -0.9833673731 | -1.1727236275 |
| O  | -1.8545807871 | -1.268738323  | -2.1760737357 |
| C  | -0.2741574456 | -1.5538858822 | 1.0341635599  |
| H  | 0.0609538799  | -0.5386998684 | 1.2755006215  |
| H  | 0.3939501967  | -1.9325356083 | 0.2487467468  |
| C  | -0.0200282121 | -2.3846523886 | 2.3027241386  |
| H  | -0.0388979257 | -3.455851994  | 2.0690076763  |
| H  | -0.826608971  | -2.2055706338 | 3.0260616614  |
| C  | 1.3253820375  | -2.0313010176 | 2.9470125187  |
| H  | 1.3008566767  | -0.9832464624 | 3.2815171413  |
| H  | 1.4674689872  | -2.6385655214 | 3.8512588626  |
| C  | 2.5299382561  | -2.2248392711 | 2.0218602077  |
| H  | 2.5396156069  | -3.2597051002 | 1.6534257125  |
| H  | 2.424192592   | -1.5848972052 | 1.1373841181  |
| C  | 3.8570506794  | -1.906269174  | 2.7068904824  |
| H  | 3.8764943021  | -0.8666135031 | 3.0559023084  |
| H  | 4.0169049776  | -2.5498122561 | 3.5795172481  |
| H  | 1.852216765   | 3.4078127281  | 1.2962795239  |
| H  | 3.2334744333  | 1.8556021655  | 0.7760786531  |
| H  | 4.7046780892  | -2.0473487606 | 2.0273184794  |
| C  | -2.2015502558 | -2.9854964948 | 0.3377212174  |
| H  | -2.1326771934 | -3.5345127723 | 1.2843572547  |
| H  | -3.239468103  | -3.0346444442 | 0.0031250726  |
| H  | -1.5804994456 | -3.5079609204 | -0.3997595407 |



Energy = -2546.2203842  
Zero-point correction = 0.442119 (Hartree/Particle)  
Thermal correction to Gibbs Free Energy = 0.384237  
Sum of electronic and zero-point Energies = -2545.778265  
Sum of electronic and thermal Energies = -2545.752360  
Sum of electronic and thermal Enthalpies = -2545.751416  
Sum of electronic and thermal Free Energies = -2545.836147  
G + ZVPE = -2545.394028  
Energy (DMF-6-31G(d)) = -2546.2532798  
Energy (DMF-def2-TZVP) = -2546.8465676

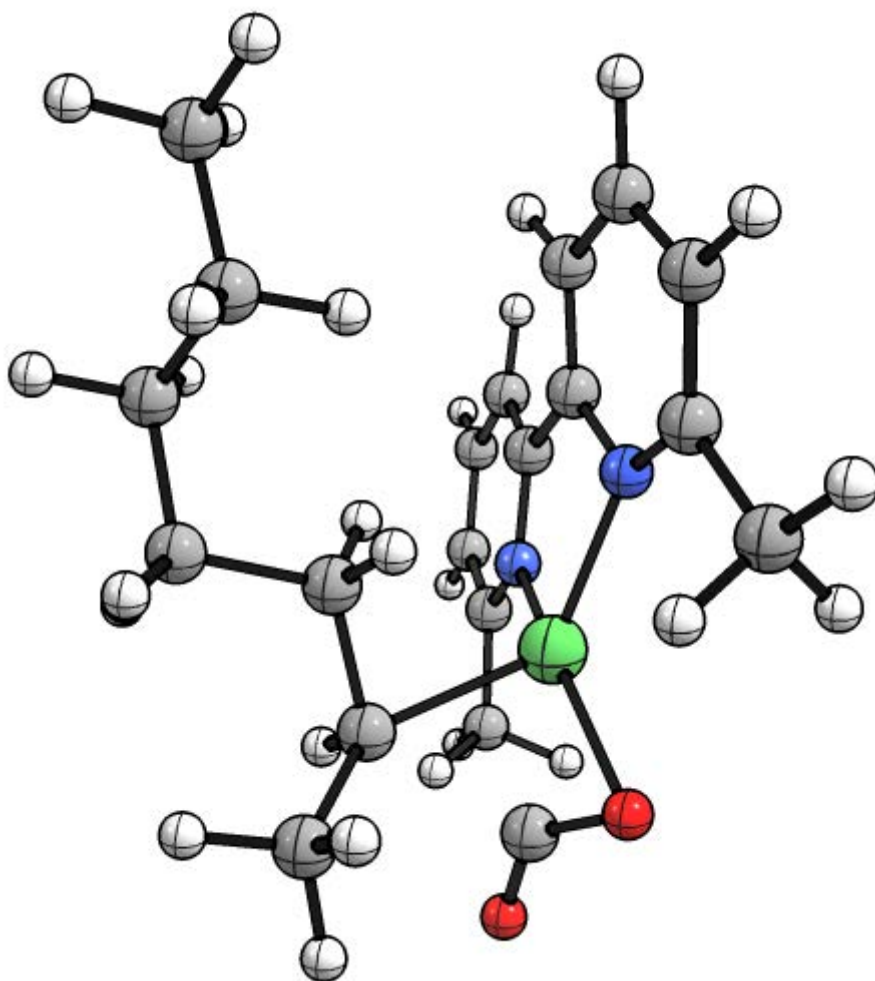

**TS<sub>E1-F1</sub>**

|    |               |               |               |
|----|---------------|---------------|---------------|
| C  | -2.51596452   | -1.1079570467 | -2.1721151633 |
| C  | -2.4282410243 | -2.284116711  | -1.4422661104 |
| C  | -1.3026818022 | -2.5164625632 | -0.6639057375 |
| C  | -0.2968926364 | -1.5558627926 | -0.6442751094 |
| C  | -1.4802491953 | -0.1774580088 | -2.1033939967 |
| C  | 0.9659706497  | -1.7076756151 | 0.1260499433  |
| C  | 1.2449379001  | -2.813052935  | 0.921468091   |
| C  | 2.4779186424  | -2.8814573661 | 1.5555044274  |
| H  | 2.7211142461  | -3.726200574  | 2.1920523598  |
| C  | 3.4007583533  | -1.8680081052 | 1.3467831036  |
| C  | 3.0657210306  | -0.7828960869 | 0.5361841661  |
| H  | -3.3837680451 | -0.8971569747 | -2.7871345147 |
| H  | -3.2288711788 | -3.0159348606 | -1.4779506009 |
| H  | 4.3837738204  | -1.907722017  | 1.802851903   |
| N  | 1.8466489118  | -0.6968389884 | -0.0286854137 |
| N  | -0.3925143398 | -0.4106755306 | -1.3475858391 |
| C  | 4.0545641947  | 0.2957459675  | 0.2171488749  |
| H  | 3.6754430476  | 1.2962242687  | 0.4430906913  |
| H  | 4.9938531228  | 0.1351394337  | 0.751770915   |
| H  | 4.2638017346  | 0.2924337376  | -0.8581837226 |
| C  | -1.5236746736 | 1.1184483426  | -2.8532032945 |
| H  | -2.4231101347 | 1.1850384034  | -3.4701462969 |
| H  | -1.4956895055 | 1.9660960045  | -2.1619595815 |
| H  | -0.6398352454 | 1.2244640049  | -3.4880826389 |
| Ni | 1.0121436142  | 0.9277237646  | -0.807998239  |
| C  | 0.9798364028  | 2.1948108483  | 0.8382216768  |
| H  | 1.7850488232  | 1.8831188678  | 1.5118202103  |
| O  | 2.8686982274  | 3.1660100765  | -0.6496444827 |
| C  | 1.7892132024  | 2.6527781196  | -0.8566321555 |
| O  | 0.9374913881  | 2.6644296553  | -1.7962480998 |
| C  | -0.3729343182 | 1.5988962498  | 1.2643896253  |
| H  | -0.2934172426 | 0.5118936716  | 1.4020359994  |
| H  | -1.1112886159 | 1.7575112665  | 0.466873098   |
| C  | -0.9234822153 | 2.2032036885  | 2.5591291269  |
| H  | -1.1212173812 | 3.2714209122  | 2.3935046303  |
| H  | -0.1494136594 | 2.1511232069  | 3.3361942438  |
| C  | -2.1988460837 | 1.5276290294  | 3.0779213789  |
| H  | -1.9655529199 | 0.4967779945  | 3.3816867725  |
| H  | -2.5093828009 | 2.047544463   | 3.9922267403  |
| C  | -3.3705806821 | 1.5053163919  | 2.0785736287  |
| H  | -4.3173920469 | 1.6297695184  | 2.6202063195  |
| H  | -3.2956134824 | 2.3717352363  | 1.4056913925  |
| C  | -3.4758722934 | 0.2235427483  | 1.2448574059  |
| H  | -2.5374017212 | 0.0402819513  | 0.7084296149  |
| H  | -3.6098419061 | -0.6289629406 | 1.9246876833  |
| C  | -4.6309879378 | 0.2713936949  | 0.2475555466  |
| H  | -4.7327921843 | -0.6736821779 | -0.2959196529 |
| H  | -5.5820338229 | 0.4702304045  | 0.7554552476  |
| H  | -4.4761877318 | 1.0672011946  | -0.4910457448 |
| H  | 0.8937770987  | 3.2792555102  | 0.9602666174  |
| H  | 0.519899978   | -3.6067685465 | 1.0527020411  |
| H  | -1.2167974221 | -3.4313752968 | -0.0909429008 |

Energy = -2546.2253075  
Zero-point correction = 0.442796 (Hartree/Particle)  
Thermal correction to Gibbs Free Energy = 0.386354  
Sum of electronic and zero-point Energies = -2545.782512  
Sum of electronic and thermal Energies = -2545.756966  
Sum of electronic and thermal Enthalpies = -2545.756022  
Sum of electronic and thermal Free Energies = -2545.838953  
G + ZVPE = -2545.396157  
Energy (DMF-6-31G(d)) = -2546.2586083  
Energy (DMF-def2-TZVP) = -2546.8545683

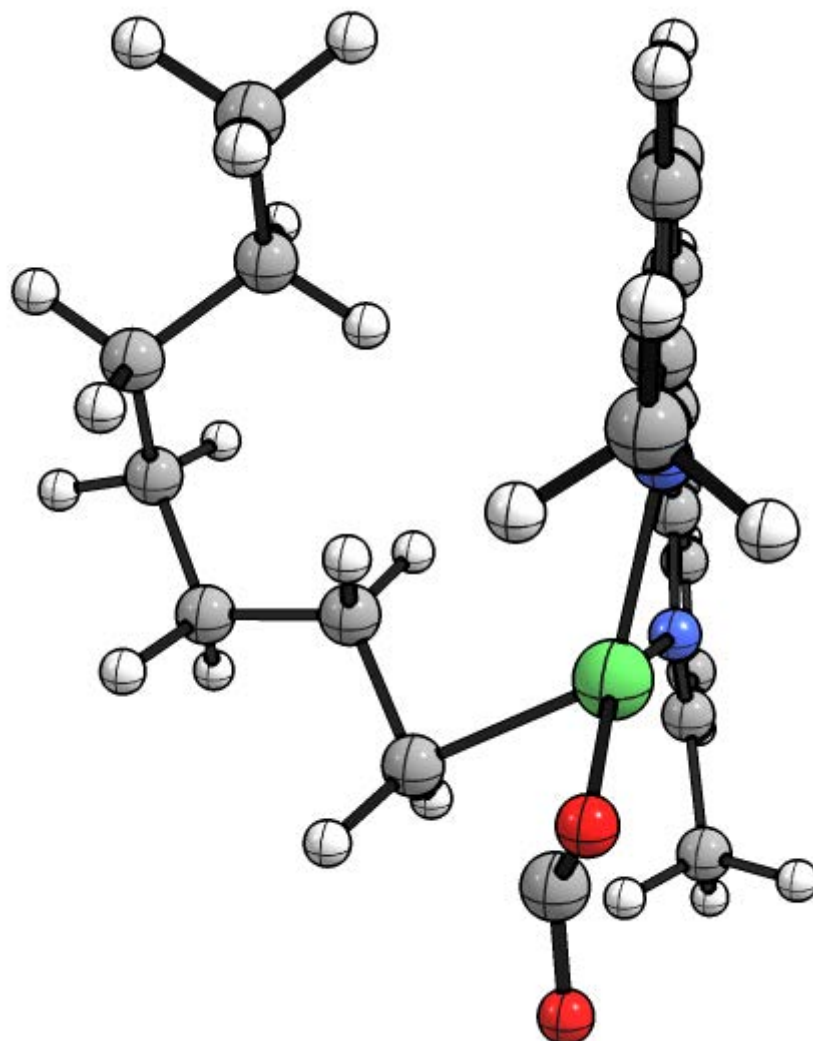

**2a-I**

|   |               |               |               |
|---|---------------|---------------|---------------|
| C | 1.4364786636  | 0.9047862123  | -1.6719977541 |
| H | 1.4122445753  | -0.0772657289 | -2.1533358984 |
| H | 2.4512451404  | 1.3061052007  | -1.7828011061 |
| C | 1.0888674312  | 0.7444844814  | -0.1853874103 |
| H | 1.2193171221  | 1.7079215098  | 0.3207620096  |
| H | 0.7383915562  | 1.5774552556  | -2.1899772131 |
| C | -0.355843774  | 0.324095408   | -0.0365061345 |
| C | -1.3348448995 | 1.2405307146  | 0.360412653   |
| C | -0.764655563  | -0.9858944043 | -0.3265892783 |
| C | -2.6760523136 | 0.8752093021  | 0.4622387624  |
| H | -1.0363886628 | 2.260934622   | 0.5939871659  |
| C | -2.1016697663 | -1.3534864103 | -0.2253302495 |
| H | 0.0108729071  | -1.699047425  | -0.5925642613 |
| C | -3.0680000076 | -0.4265598803 | 0.1658540296  |
| H | -3.4147598256 | 1.6100433746  | 0.7762585088  |
| H | -2.3933499523 | -2.3783703531 | -0.4465439274 |
| H | -4.1131253385 | -0.7180386652 | 0.2453194873  |
| O | 2.1951270175  | -1.3837124462 | -0.1021807529 |
| O | 2.7002306108  | 0.1494037533  | 1.4874742912  |
| C | 2.1028354643  | -0.2757101301 | 0.4817298719  |

Energy = -498.7162539

Zero-point correction = 0.160952 (Hartree/Particle)

Thermal correction to Gibbs Free Energy = 0.125063

Sum of electronic and zero-point Energies = -498.555302

Sum of electronic and thermal Energies = -498.545709

Sum of electronic and thermal Enthalpies = -498.544764

Sum of electronic and thermal Free Energies = -498.591191

G + ZVPE = -498.430239

Energy (DMF-6-31G(d)) = -498.8053921

Energy (DMF-def2-TZVP) = -499.0052571

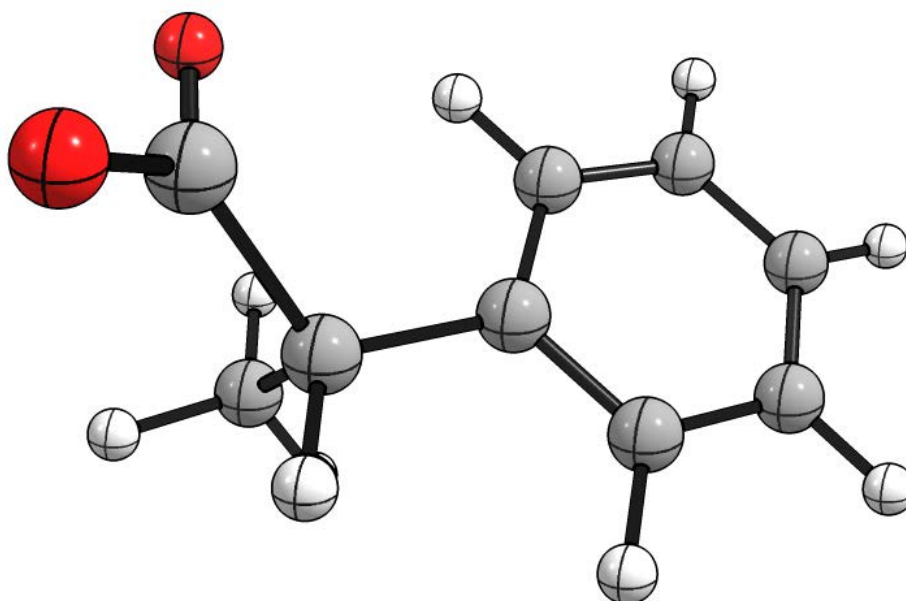

**2a'-I**

|   |               |               |               |
|---|---------------|---------------|---------------|
| C | 1.5399535675  | -0.2147912467 | -0.4906586583 |
| H | 1.4084339808  | -1.1989375818 | -0.9565706472 |
| H | 1.2579449152  | 0.5272826653  | -1.2530401992 |
| C | -0.8392139329 | -0.0167775086 | 0.3790256496  |
| C | -1.4517222428 | 1.1754769071  | -0.0263649826 |
| C | -1.6283036872 | -1.1717503036 | 0.4045236708  |
| C | -2.794143436  | 1.2143878735  | -0.3888519036 |
| H | -0.8546004799 | 2.0843138757  | -0.0563156392 |
| C | -2.9728305823 | -1.1417041509 | 0.0437921214  |
| H | -1.1716839078 | -2.1098984719 | 0.7128045681  |
| C | -3.5647905232 | 0.0537797394  | -0.3550221846 |
| H | -3.2433711972 | 2.1556874243  | -0.697454783  |
| H | -3.5606095576 | -2.0565310297 | 0.0748650545  |
| H | -4.6150292776 | 0.0822206505  | -0.6346657006 |
| C | 3.0619201372  | 0.0033481036  | -0.1497215253 |
| O | 3.8555778762  | -0.5332716167 | -0.9502130646 |
| O | 3.2904313973  | 0.7103234837  | 0.8592017974  |
| C | 0.6248592161  | -0.0520767276 | 0.7284575664  |
| H | 0.9375731643  | 0.8683478582  | 1.2315742527  |
| H | 0.8188970947  | -0.8682564005 | 1.4358147579  |

Energy = -498.711313

Zero-point correction = 0.160536 (Hartree/Particle)

Thermal correction to Gibbs Free Energy = 0.122257

Sum of electronic and zero-point Energies = -498.550777

Sum of electronic and thermal Energies = -498.541011

Sum of electronic and thermal Enthalpies = -498.540067

Sum of electronic and thermal Free Energies = -498.589056

G + ZVPE = -498.428520

Energy (DMF-6-31G(d)) = -498.8041843

Energy (DMF-def2-TZVP) = -310.1234282

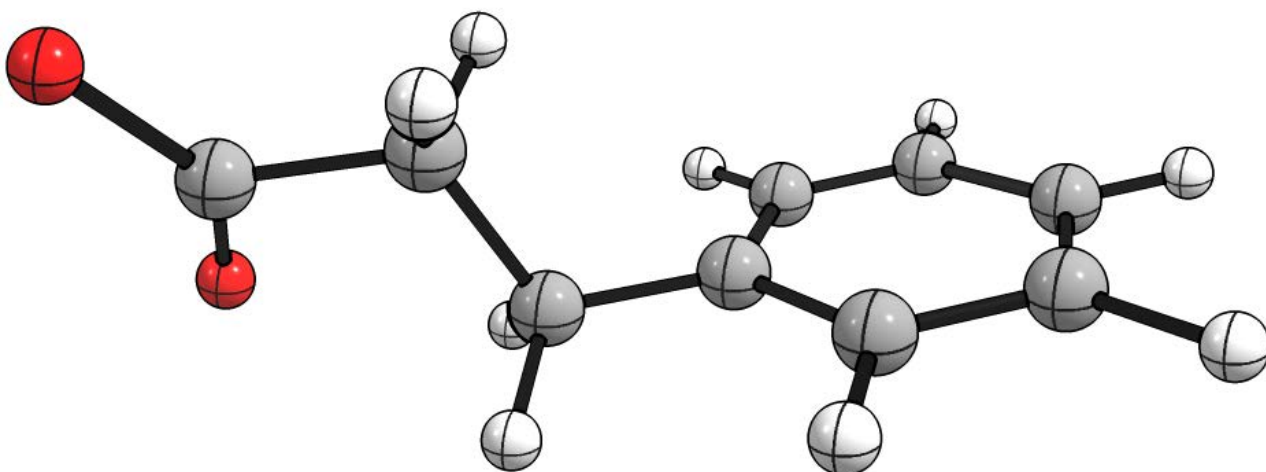

**R**

|   |               |               |               |
|---|---------------|---------------|---------------|
| C | -1.8291831498 | -0.6522613455 | 0.0000016678  |
| H | -2.0761788186 | -1.7109729784 | 0.0000687265  |
| C | -0.4583485448 | -0.3003641698 | 0.0000141526  |
| C | 0.542625697   | -1.3076100431 | 0.000002258   |
| C | -0.0218934511 | 1.0503436109  | 0.0000123613  |
| C | 1.8871872214  | -0.9840544234 | -0.0000094151 |
| H | 0.2351665505  | -2.350601197  | 0.0000043976  |
| C | 1.3273011556  | 1.3638921086  | 0.0000036206  |
| H | -0.7575796858 | 1.8490751857  | 0.0000265735  |
| C | 2.291983555   | 0.3542851916  | -0.0000085662 |
| H | 2.6318247726  | -1.7748529491 | -0.0000148331 |
| H | 1.6354449389  | 2.4057463994  | 0.0000109794  |
| H | 3.3481520417  | 0.6057290684  | -0.0000195239 |
| C | -2.9503852664 | 0.3356219115  | -0.0000188011 |
| H | -2.915935211  | 0.992451402   | -0.8809888857 |
| H | -3.9202451832 | -0.1676997838 | -0.0003715263 |
| H | -2.9163726977 | 0.9920078351  | 0.8813004282  |

Energy = -310.1234282

Zero-point correction = 0.144522 (Hartree/Particle)

Thermal correction to Gibbs Free Energy = 0.112063

Sum of electronic and zero-point Energies = -309.978907

Sum of electronic and thermal Energies = -309.971523

Sum of electronic and thermal Enthalpies = -309.970579

Sum of electronic and thermal Free Energies = -310.011365

G + ZVPE = -309.866843

Energy (DMF-6-31G(d)) = -310.1322444

Energy (DMF-def2-TZVP) = -310.2400421

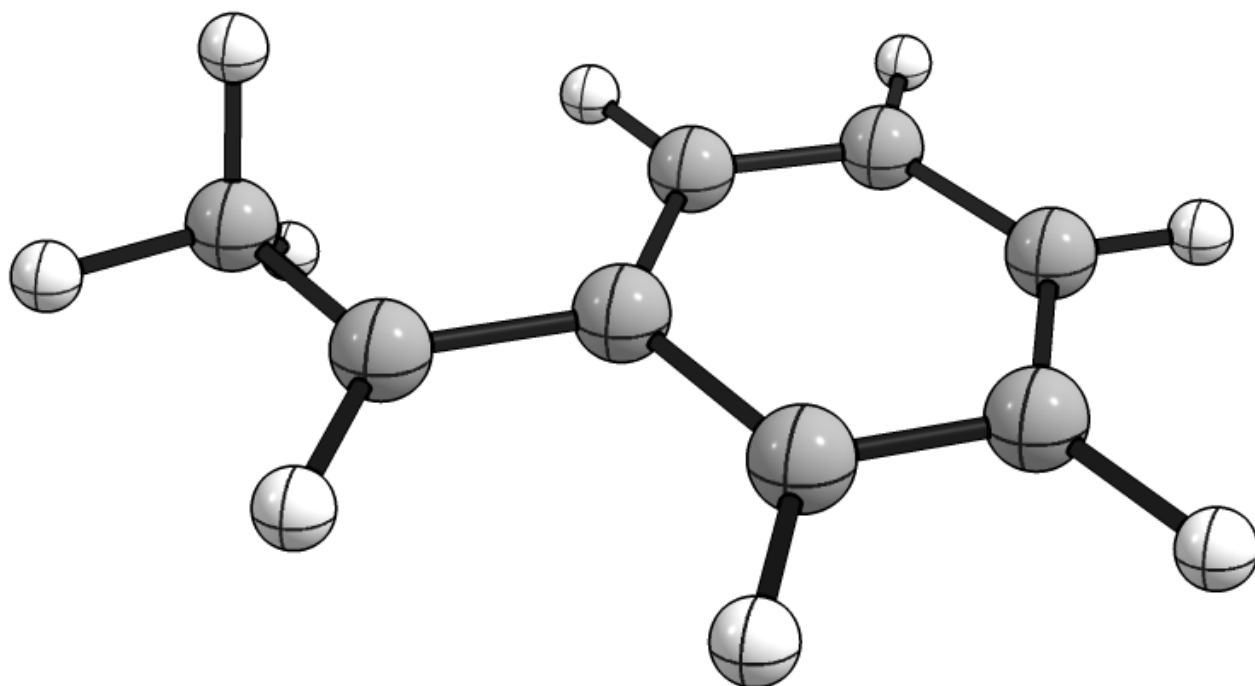

## G

|    |               |               |               |
|----|---------------|---------------|---------------|
| C  | 3.4245192833  | 0.5031566983  | -0.111989117  |
| C  | 2.8202726608  | 1.7536755552  | -0.106164656  |
| C  | 1.4252599626  | 1.8285945771  | -0.0383329623 |
| C  | 0.7092852178  | 0.6175360924  | 0.0255302665  |
| C  | 2.6665751372  | -0.6578281393 | 0.0341722201  |
| C  | 0.6783199659  | 3.0585832279  | -0.0371102573 |
| C  | -0.70877878   | 0.6179921792  | -0.0213174613 |
| C  | -1.4238879113 | 1.8297003953  | 0.0399145802  |
| C  | -0.676066323  | 3.0591472159  | 0.0359780056  |
| C  | -2.8189481622 | 1.7559253047  | 0.1079629439  |
| H  | -3.4131000714 | 2.6635159345  | 0.1599890259  |
| C  | -3.4240751911 | 0.5058450303  | 0.1165890014  |
| C  | -2.6669712801 | -0.6559965321 | -0.0270418294 |
| H  | 1.228383219   | 3.9950799536  | -0.0715740854 |
| H  | 4.5045620071  | 0.4165787238  | -0.1759290506 |
| H  | 3.4150633462  | 2.6607321912  | -0.1601686998 |
| H  | -1.2254608824 | 3.9961101519  | 0.0683871337  |
| H  | -4.5041752511 | 0.4201709096  | 0.180783453   |
| N  | -1.3247911262 | -0.6109221897 | -0.1974938372 |
| N  | 1.3244248057  | -0.6114261479 | 0.2044154132  |
| C  | -3.2885585276 | -2.0185860575 | -0.0923464295 |
| H  | -2.8164218749 | -2.5927095816 | -0.9003741474 |
| H  | -3.1220919981 | -2.5709326781 | 0.8401251496  |
| H  | -4.3672937435 | -1.9689884974 | -0.2649724188 |
| C  | 3.2872212209  | -2.0207010096 | 0.1025956794  |
| H  | 2.8148373275  | -2.5925889227 | 0.9120596785  |
| H  | 3.1202219441  | -2.5751388529 | -0.8285386479 |
| H  | 4.3660187502  | -1.9714399581 | 0.2749252439  |
| Ni | -0.0006012428 | -1.8235231761 | 0.0045755533  |

Energy = -2158.1022149

Zero-point correction = 0.228959 (Hartree/Particle)

Thermal correction to Gibbs Free Energy = 0.187862

Sum of electronic and zero-point Energies = -2157.873256

Sum of electronic and thermal Energies = -2157.859107

Sum of electronic and thermal Enthalpies = -2157.858163

Sum of electronic and thermal Free Energies = -2157.914352

G + ZVPE = -2157.685393

Energy (DMF-6-31G(d)) = -2158.1249582

Energy (DMF-def2-TZVP) = -2158.597988

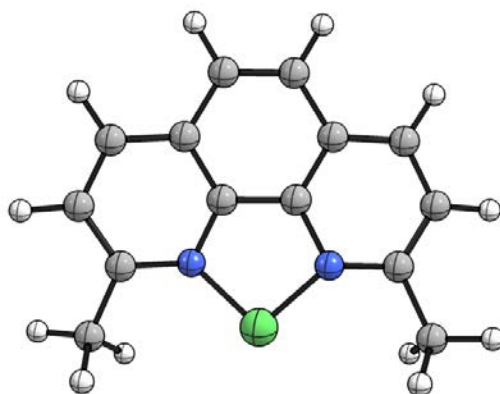

## H

|    |               |               |               |
|----|---------------|---------------|---------------|
| C  | -3.2942113154 | -2.3191549367 | -1.715383136  |
| C  | -4.2407214519 | -1.3568942215 | -1.4579911142 |
| C  | -3.8345653605 | -0.133195538  | -0.8946978457 |
| C  | -2.4712440648 | 0.0064818516  | -0.5935030428 |
| C  | -1.9413394069 | -2.1011475901 | -1.3859917924 |
| C  | -4.7256695055 | 0.9619918137  | -0.6371954798 |
| C  | -1.9729363981 | 1.2505046254  | -0.0761203687 |
| C  | -2.8591094318 | 2.321444914   | 0.1186246865  |
| C  | -4.2568827514 | 2.1383067312  | -0.1527328389 |
| C  | -2.3059164893 | 3.5349221582  | 0.5648133724  |
| H  | -2.9469443075 | 4.3950730032  | 0.7360981868  |
| C  | -0.9488555081 | 3.614545553   | 0.7590286841  |
| C  | -0.1233366893 | 2.4912923614  | 0.5477650925  |
| H  | -5.7827657192 | 0.831411252   | -0.8497789135 |
| H  | -3.5738872699 | -3.2601003462 | -2.177400724  |
| H  | -5.2863968996 | -1.5220383313 | -1.7016158289 |
| H  | -4.9318420314 | 2.9695781692  | 0.0299081655  |
| H  | -0.4913885758 | 4.5429826421  | 1.0832283919  |
| N  | -0.6294407318 | 1.3157511381  | 0.1613775053  |
| N  | -1.5443621111 | -0.9701127841 | -0.7989460397 |
| C  | 1.3521370349  | 2.5939657788  | 0.780618802   |
| H  | 1.6355784768  | 1.9658362317  | 1.6285937134  |
| H  | 1.9241821324  | 2.2542106318  | -0.087495272  |
| H  | 1.641824112   | 3.6249025564  | 0.997504494   |
| C  | -0.9088523835 | -3.1457267837 | -1.6843671761 |
| H  | 0.02447297    | -2.6773737855 | -2.0046586085 |
| H  | -0.6883113205 | -3.7325363963 | -0.7878528132 |
| H  | -1.2579422746 | -3.8274669721 | -2.4646940522 |
| Ni | 0.0531497418  | -0.4967672202 | 0.1647527176  |
| C  | 2.8945399785  | -0.4541627975 | 0.7418988686  |
| H  | 3.2456060554  | 0.4858168499  | 1.1823870354  |
| H  | 3.6482814414  | -1.2113155447 | 0.994790143   |
| C  | 1.5325011437  | -0.821948812  | 1.322738431   |
| C  | 0.8762549722  | -2.0512211757 | 0.8320201233  |
| C  | 1.3399921269  | -0.5043433963 | 2.7263999213  |
| C  | 0.088013209   | -2.8188649759 | 1.7744895314  |
| H  | 1.4036968076  | -2.6482970696 | 0.0811859493  |
| C  | 0.4981105254  | -1.2059490052 | 3.5318305673  |
| H  | 1.9083822239  | 0.325115423   | 3.1490307651  |
| C  | -0.147610123  | -2.3903057493 | 3.0438853493  |
| H  | -0.3178836894 | -3.7788334647 | 1.4565865456  |
| H  | 0.3618673019  | -0.912481068  | 4.5692707529  |
| H  | -0.7664237081 | -2.9785484637 | 3.7161512337  |
| C  | 2.8355438636  | -0.2931887221 | -0.7706454838 |
| H  | 1.9844225228  | 0.3211487365  | -1.0673075664 |
| H  | 2.7867262713  | -1.2464491119 | -1.2972015878 |
| Br | 4.4254891619  | 0.6190076063  | -1.4739924963 |



Energy = -5040.1176903  
Zero-point correction = 0.382613 (Hartree/Particle)  
Thermal correction to Gibbs Free Energy = 0.329928  
Sum of electronic and zero-point Energies = -5039.735077  
Sum of electronic and thermal Energies = -5039.712288  
Sum of electronic and thermal Enthalpies = -5039.711344  
Sum of electronic and thermal Free Energies = -5039.787762  
G + ZVPE = -5039.405149  
Energy (DMF-6-31G(d)) = -5040.2248353  
Energy (DMF-def2-TZVP) = -5043.1860583

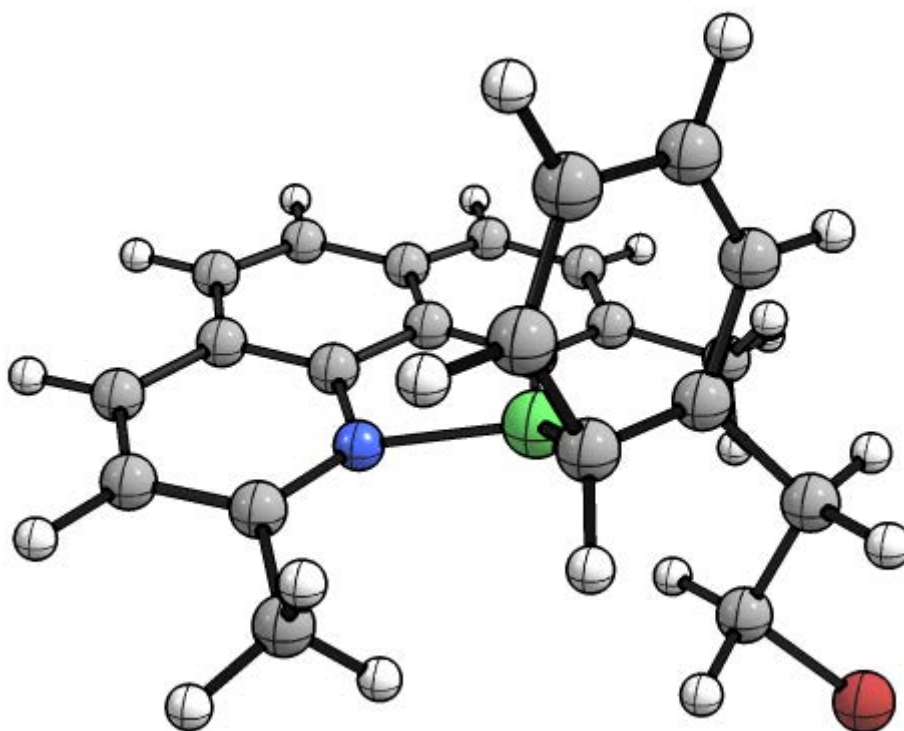

## I

|    |               |               |               |
|----|---------------|---------------|---------------|
| C  | -2.3053297111 | -3.2553918914 | -0.3649698234 |
| C  | -3.4599525964 | -2.5084379623 | -0.2978043766 |
| C  | -3.3634824536 | -1.1064685425 | -0.283077168  |
| C  | -2.0719687429 | -0.5556411438 | -0.3072216386 |
| C  | -1.0462872771 | -2.6284634125 | -0.3891390928 |
| C  | -4.4956701197 | -0.223334037  | -0.2571398847 |
| C  | -1.8956884586 | 0.8646862641  | -0.3414803509 |
| C  | -3.0195120238 | 1.7071505251  | -0.3475135643 |
| C  | -4.3302069636 | 1.1224620822  | -0.2869716466 |
| C  | -2.7815400489 | 3.0900837737  | -0.4247732515 |
| H  | -3.61412237   | 3.787969778   | -0.4267249423 |
| C  | -1.4831305771 | 3.536353773   | -0.5180186419 |
| C  | -0.4096052246 | 2.6267939643  | -0.5119871955 |
| H  | -5.4903321277 | -0.6584701605 | -0.2182889075 |
| H  | -2.3514167438 | -4.3389919033 | -0.4043006204 |
| H  | -4.4345846915 | -2.9875980714 | -0.2731041811 |
| H  | -5.1906371772 | 1.785762604   | -0.2733069295 |
| H  | -1.2694287803 | 4.5967726481  | -0.6049866434 |
| N  | -0.6069027094 | 1.3098739531  | -0.3925656618 |
| N  | -0.9305897502 | -1.2983972107 | -0.3235987233 |
| C  | 1.0030651728  | 3.1116022251  | -0.6250976316 |
| H  | 1.4536454316  | 3.1820880049  | 0.370661346   |
| H  | 1.6007968125  | 2.4056992074  | -1.2063537305 |
| H  | 1.046728685   | 4.0988615521  | -1.0933626434 |
| C  | 0.2150161126  | -3.4348119958 | -0.4749838405 |
| H  | 0.9562893842  | -2.9141483648 | -1.0868553407 |
| H  | 0.652453405   | -3.5696596521 | 0.5198783596  |
| H  | 0.0207808074  | -4.4229593456 | -0.9017140793 |
| Ni | 0.5958567119  | -0.1707207126 | 0.0359795499  |
| C  | 3.3014454483  | 0.6980011585  | 0.798679382   |
| H  | 3.3358987688  | 1.749978567   | 0.4888281841  |
| H  | 4.0443698148  | 0.5885668249  | 1.6053247384  |
| C  | 1.9118702372  | 0.3557181833  | 1.3247912311  |
| C  | 1.5217110511  | -1.0591164747 | 1.4436057546  |
| C  | 1.4267277216  | 1.2474290475  | 2.3611437882  |
| C  | 0.6665500456  | -1.4336159208 | 2.5472793789  |
| H  | 2.2280556832  | -1.8337702536 | 1.1304559125  |
| C  | 0.5484315753  | 0.8535136399  | 3.3233173901  |
| H  | 1.8020137473  | 2.2717211956  | 2.373249373   |
| C  | 0.1506781761  | -0.5197498314 | 3.4156285229  |
| H  | 0.4352368445  | -2.4893487306 | 2.6869336152  |
| H  | 0.189939934   | 1.5670537643  | 4.0605012475  |
| H  | -0.5148064199 | -0.834257204  | 4.2149843363  |
| C  | 3.81477145    | -0.166857873  | -0.335979775  |
| H  | 3.9869176432  | -1.1992976551 | -0.0330057857 |
| H  | 4.7165465698  | 0.2340826458  | -0.7976442109 |
| Br | 2.4881930657  | -0.2929041729 | -1.794719177  |

Energy = -5040.1317286  
Zero-point correction = 0.382024 (Hartree/Particle)  
Thermal correction to Gibbs Free Energy = 0.330510  
Sum of electronic and zero-point Energies = -5039.749705  
Sum of electronic and thermal Energies = -5039.727023  
Sum of electronic and thermal Enthalpies = -5039.726079  
Sum of electronic and thermal Free Energies = -5039.801219  
G + ZVPE = -5039.419195  
Energy (DMF-6-31G(d)) = -5040.159697  
Energy (DMF-def2-TZVP) = -5043.1800923

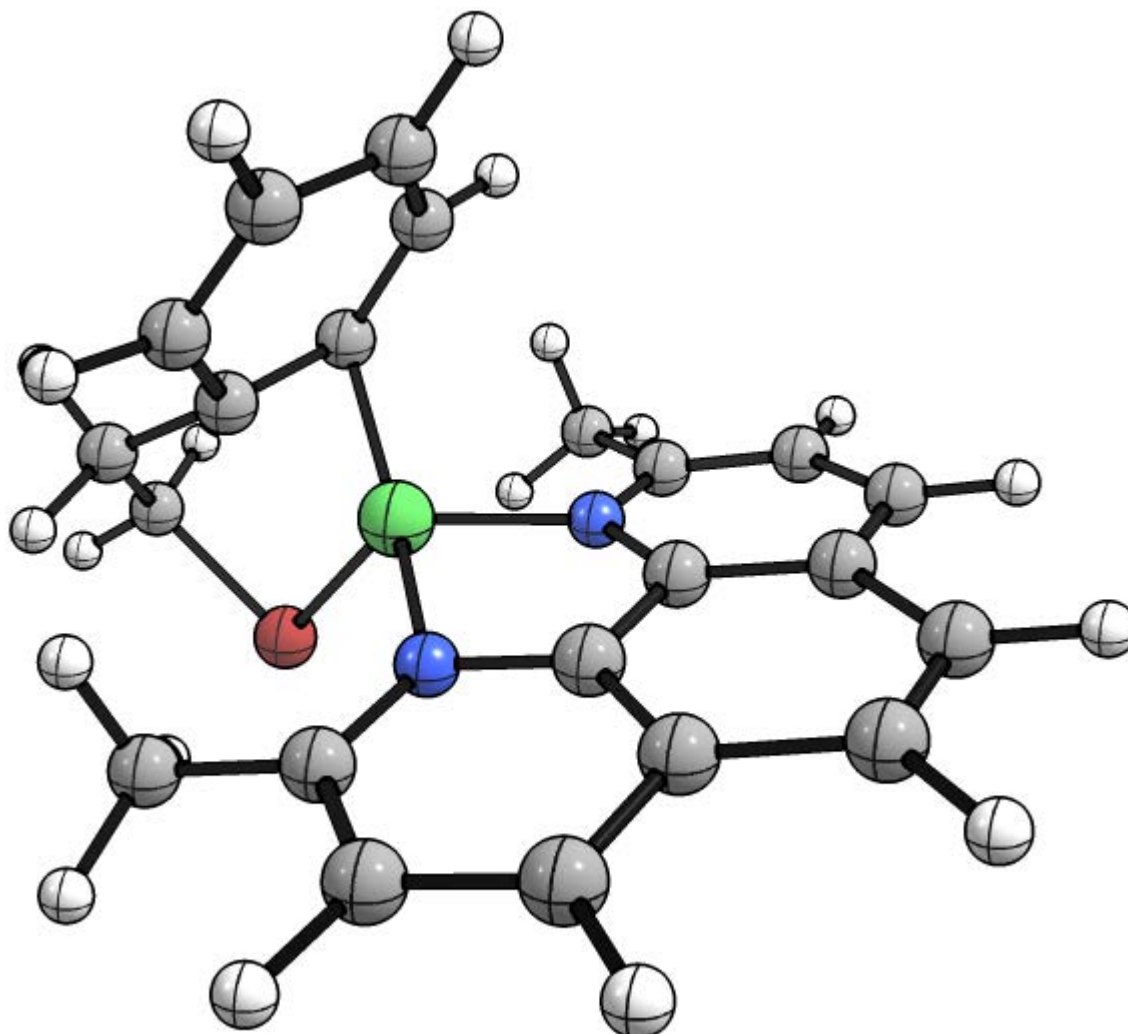

**J**

|    |               |               |               |
|----|---------------|---------------|---------------|
| C  | 0.7992856551  | -3.1885124967 | -1.4660263526 |
| C  | 2.0969538871  | -2.795018531  | -1.2769455679 |
| C  | 2.3625533628  | -1.4372194218 | -1.0247316668 |
| C  | 1.2552941819  | -0.5812011862 | -0.9393199571 |
| C  | -0.261777924  | -2.2544141587 | -1.40073867   |
| C  | 3.686078421   | -0.9072608936 | -0.8713116845 |
| C  | 1.4810733901  | 0.8175088935  | -0.7186343123 |
| C  | 2.783707982   | 1.3299828564  | -0.6669474524 |
| C  | 3.8928084033  | 0.4232980838  | -0.710976753  |
| C  | 2.9121253732  | 2.7308372945  | -0.5910058715 |
| H  | 3.8988327365  | 3.1825216815  | -0.5397502539 |
| C  | 1.782670918   | 3.5095387287  | -0.6251658319 |
| C  | 0.5021482253  | 2.9164048769  | -0.6449571865 |
| H  | 4.5243380886  | -1.596982138  | -0.9104267174 |
| H  | 0.5637863347  | -4.2243061209 | -1.6852941781 |
| H  | 2.9137793748  | -3.5090203996 | -1.3358519926 |
| H  | 4.898011706   | 0.8253701597  | -0.6248888923 |
| H  | 1.8537876357  | 4.5922640477  | -0.621496877  |
| N  | 0.3699508706  | 1.5912473176  | -0.6235760407 |
| N  | -0.0384581533 | -0.9700196383 | -1.1185018682 |
| C  | -0.7231464106 | 3.7805534017  | -0.7105625342 |
| H  | -1.6120102204 | 3.1770268059  | -0.8975721087 |
| H  | -0.8708065795 | 4.3255891675  | 0.2270314346  |
| H  | -0.6081124614 | 4.5175157878  | -1.5125110566 |
| C  | -1.6540869048 | -2.7296271456 | -1.6736439767 |
| H  | -2.2350600738 | -2.7658112194 | -0.7474182663 |
| H  | -2.1803169297 | -2.0383593702 | -2.3329437336 |
| H  | -1.6320198342 | -3.7255754723 | -2.1237992798 |
| Ni | -1.1879963932 | 0.5669771727  | -0.2660656564 |
| C  | -1.529961707  | 0.5895136499  | 2.4578225274  |
| H  | -2.4142601833 | -0.0541397381 | 2.4356831288  |
| H  | -1.556226878  | 1.1350492924  | 3.4133917755  |
| C  | -0.2859963471 | -0.2715082826 | 2.4215110118  |
| C  | 0.9800757886  | 0.2959757143  | 2.6006576744  |
| C  | -0.3612308626 | -1.6423831771 | 2.161544564   |
| C  | 2.1332851305  | -0.4784587853 | 2.5277473052  |
| H  | 1.0596984691  | 1.3638353014  | 2.7934780062  |
| C  | 0.7892726274  | -2.4243027867 | 2.0914651077  |
| H  | -1.3368399241 | -2.093214721  | 1.995679646   |
| C  | 2.0412241186  | -1.8454145547 | 2.2753111126  |
| H  | 3.1065474345  | -0.0146416781 | 2.6636967825  |
| H  | 0.7054377334  | -3.4882224018 | 1.8875542746  |
| H  | 2.9406234709  | -2.4520580254 | 2.2161539268  |
| C  | -1.5828060945 | 1.5872964859  | 1.2902158612  |
| H  | -0.8136370203 | 2.3521577189  | 1.4711374583  |
| H  | -2.5515777795 | 2.0983720927  | 1.2884597443  |
| Br | -3.323080922  | -0.1824244773 | -0.4127935188 |

Energy = -5040.1937433  
Zero-point correction = 0.383596 (Hartree/Particle)  
Thermal correction to Gibbs Free Energy = 0.331549  
Sum of electronic and zero-point Energies = -5039.810147  
Sum of electronic and thermal Energies = -5039.787355  
Sum of electronic and thermal Enthalpies = -5039.786411  
Sum of electronic and thermal Free Energies = -5039.862194  
G + ZVPE = -5039.478598  
Energy (DMF-6-31G(d)) = -5040.2248353  
Energy (DMF-def2-TZVP) = -5043.2410744

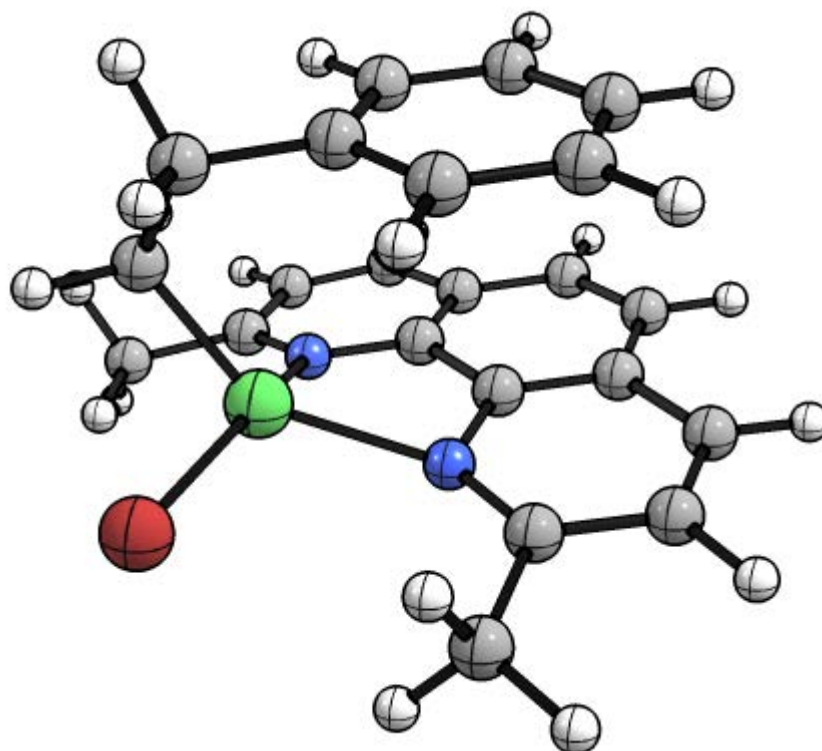

**J-solv**

|    |               |               |               |
|----|---------------|---------------|---------------|
| C  | 0.8050432771  | -3.1700697654 | -1.5144951866 |
| C  | 2.1016060726  | -2.7632505757 | -1.3439587138 |
| C  | 2.3567761768  | -1.4014786161 | -1.0936590736 |
| C  | 1.2432412326  | -0.5549989025 | -0.9876867788 |
| C  | -0.2633251233 | -2.2466506616 | -1.4277015016 |
| C  | 3.6793611302  | -0.8642801163 | -0.9534039903 |
| C  | 1.4604936973  | 0.8420955885  | -0.7529109797 |
| C  | 2.7597351733  | 1.3630680327  | -0.7126868039 |
| C  | 3.8766991336  | 0.4675960905  | -0.7829968372 |
| C  | 2.882152588   | 2.7649184472  | -0.6150575457 |
| H  | 3.8675847498  | 3.2192374419  | -0.5722601089 |
| C  | 1.7480491301  | 3.5363759971  | -0.6160409219 |
| C  | 0.4708772936  | 2.9344521222  | -0.6220801952 |
| H  | 4.5198185693  | -1.5497646618 | -1.0100743371 |
| H  | 0.576752187   | -4.2076685104 | -1.7325669375 |
| H  | 2.9255492646  | -3.467318322  | -1.4155253649 |
| H  | 4.877847785   | 0.8807989908  | -0.7056515512 |
| H  | 1.8112353137  | 4.6192339399  | -0.5942064198 |
| N  | 0.3451905476  | 1.6080700932  | -0.6252054646 |
| N  | -0.0522479314 | -0.9601203981 | -1.1413605149 |
| C  | -0.7532323076 | 3.7983971498  | -0.6399691155 |
| H  | -1.6512929213 | 3.2041620935  | -0.8145059343 |
| H  | -0.866187207  | 4.3373717742  | 0.3064395394  |
| H  | -0.6559098625 | 4.5459823735  | -1.4344432327 |
| C  | -1.6534987825 | -2.7441893686 | -1.6723688334 |
| H  | -2.1947400581 | -2.8433568661 | -0.7263989881 |
| H  | -2.2197258783 | -2.046738537  | -2.2906670638 |
| H  | -1.6197539187 | -3.7220628023 | -2.1595174346 |
| Ni | -1.1951345473 | 0.5521739957  | -0.2463782172 |
| C  | -1.4931005836 | 0.51937312    | 2.4900848325  |
| H  | -2.3620007308 | -0.1462150785 | 2.4546434859  |
| H  | -1.5365438009 | 1.0469066283  | 3.456044774   |
| C  | -0.2330210431 | -0.3187437118 | 2.4505485971  |
| C  | 1.0238346536  | 0.273024502   | 2.624497955   |
| C  | -0.2846404877 | -1.6930964597 | 2.1986644556  |
| C  | 2.1909441188  | -0.4828630454 | 2.5536303481  |
| H  | 1.0884751476  | 1.3430480466  | 2.811551466   |
| C  | 0.8799274283  | -2.4564363625 | 2.1290403472  |
| H  | -1.2510084186 | -2.166646397  | 2.0400999745  |
| C  | 2.1229327438  | -1.8538249613 | 2.3070383097  |
| H  | 3.1559231919  | -0.0011893289 | 2.687413359   |
| H  | 0.8141947089  | -3.5225834649 | 1.9291233879  |
| H  | 3.0328973417  | -2.4442816859 | 2.2459788304  |
| C  | -1.5662182174 | 1.5378129893  | 1.3401276901  |
| H  | -0.8024563578 | 2.3060061477  | 1.5235517041  |
| H  | -2.5390326209 | 2.0446532417  | 1.3698551602  |
| Br | -3.3622738578 | -0.1747902062 | -0.4163761699 |

Energy = -5040.2254044  
Zero-point correction = 0.383239 (Hartree/Particle)  
Thermal correction to Gibbs Free Energy = 0.331744  
Sum of electronic and zero-point Energies = -5039.842165  
Sum of electronic and thermal Energies = -5039.819406  
Sum of electronic and thermal Enthalpies = -5039.818462  
Sum of electronic and thermal Free Energies = -5039.893660  
G + ZVPE = -5039.510421

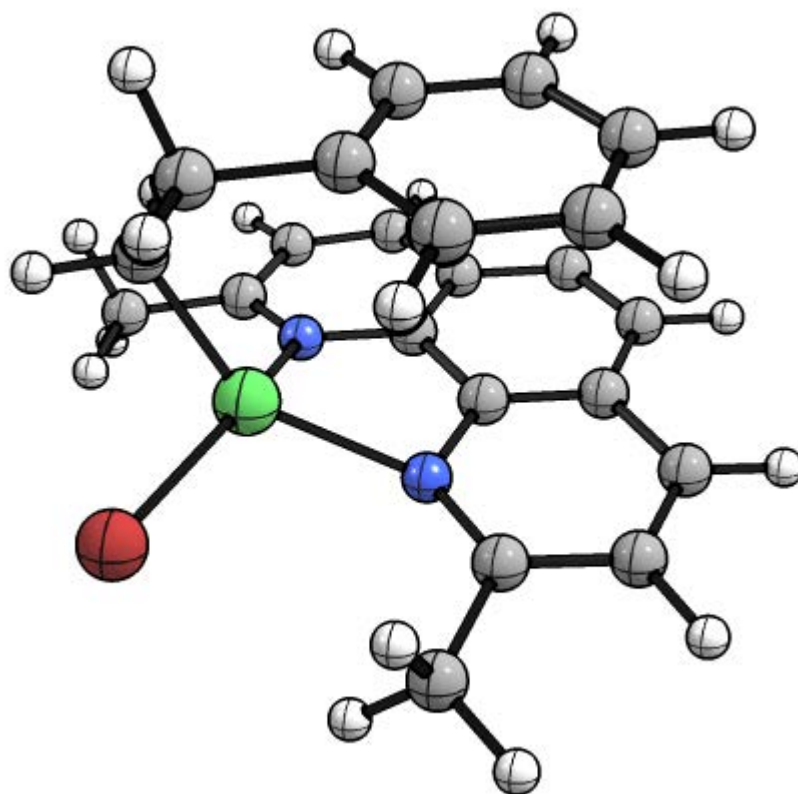

**K**

|    |               |               |               |
|----|---------------|---------------|---------------|
| C  | -0.6348218343 | -3.4958106125 | 0.7803909066  |
| C  | -1.8070765708 | -3.4689212717 | 0.067596042   |
| C  | -2.3679277341 | -2.2279576372 | -0.2980662717 |
| C  | -1.6610011977 | -1.0809213274 | 0.083955612   |
| C  | 0.017125055   | -2.2960785664 | 1.1366138789  |
| C  | -3.6047686601 | -2.088911907  | -1.0094877172 |
| C  | -2.1818354831 | 0.2183730229  | -0.2208097262 |
| C  | -3.4119502386 | 0.32781492    | -0.8795884182 |
| C  | -4.1072019881 | -0.8594492777 | -1.2854882397 |
| C  | -3.9091490674 | 1.6303032256  | -1.0871405143 |
| H  | -4.8566775155 | 1.7755981259  | -1.5971373986 |
| C  | -3.1966583278 | 2.6996425467  | -0.6120559217 |
| C  | -1.9583005313 | 2.5169449039  | 0.0434182885  |
| H  | -4.1362981302 | -2.9860148102 | -1.3103331308 |
| H  | -0.1949697491 | -4.4388075574 | 1.0839868933  |
| H  | -2.3105376033 | -4.3916816546 | -0.2049108589 |
| H  | -5.0516180487 | -0.7516545098 | -1.809254643  |
| H  | -3.5732747103 | 3.7087708415  | -0.7330551586 |
| N  | -1.4463091886 | 1.2927028248  | 0.2041323144  |
| N  | -0.4893665415 | -1.1143858855 | 0.777377581   |
| C  | -1.2299030265 | 3.7167050494  | 0.5653594886  |
| H  | -0.8380456313 | 3.5318159144  | 1.5670545686  |
| H  | -0.3886115656 | 3.9721190861  | -0.0856646237 |
| H  | -1.8996341256 | 4.5779705479  | 0.604666888   |
| C  | 1.2987584694  | -2.3360459662 | 1.9163154105  |
| H  | 2.1485930206  | -2.0737859957 | 1.2737617944  |
| H  | 1.2690491221  | -1.6375029567 | 2.7579210391  |
| H  | 1.4800202481  | -3.3361030418 | 2.3142644555  |
| Ni | 0.2381036258  | 0.6898678953  | 0.8327566268  |
| C  | 2.2864146845  | 0.9987357677  | 1.0157849683  |
| H  | 1.6268780944  | 0.0783711441  | 1.3361928303  |
| H  | 2.788864216   | 1.1777124427  | 1.9703369315  |
| C  | 3.211659528   | 0.4369794483  | -0.0310689516 |
| C  | 4.5509957238  | 0.8234689053  | -0.0579169257 |
| C  | 2.7389669487  | -0.4557286217 | -0.9935344902 |
| C  | 5.4026704306  | 0.3292866623  | -1.0402675    |
| H  | 4.9278783248  | 1.5160250208  | 0.6899770116  |
| C  | 3.5902425129  | -0.9525417565 | -1.9757303215 |
| H  | 1.6959907387  | -0.768734572  | -0.9745666623 |
| C  | 4.9247852575  | -0.5599458575 | -1.9999659603 |
| H  | 6.4437272619  | 0.635826001   | -1.0537615453 |
| H  | 3.2124572521  | -1.6477440227 | -2.7189330351 |
| H  | 5.5928996356  | -0.9466138129 | -2.762665843  |
| C  | 1.3937188062  | 2.1265965158  | 0.6332033141  |
| H  | 1.5079844801  | 2.4775358072  | -0.3940630465 |
| H  | 1.3696967433  | 2.947149443   | 1.3493269504  |



Energy = -2468.2098314  
Zero-point correction = 0.383134 (Hartree/Particle)  
Thermal correction to Gibbs Free Energy = 0.333690  
Sum of electronic and zero-point Energies = -2467.826697  
Sum of electronic and thermal Energies = -2467.806127  
Sum of electronic and thermal Enthalpies = -2467.805183  
Sum of electronic and thermal Free Energies = -2467.876141  
G + ZVPE = -2467.493007  
Energy (DMF-6-31G(d)) = -2468.2913585  
Energy (DMF-def2-TZVP) = -2468.8364775

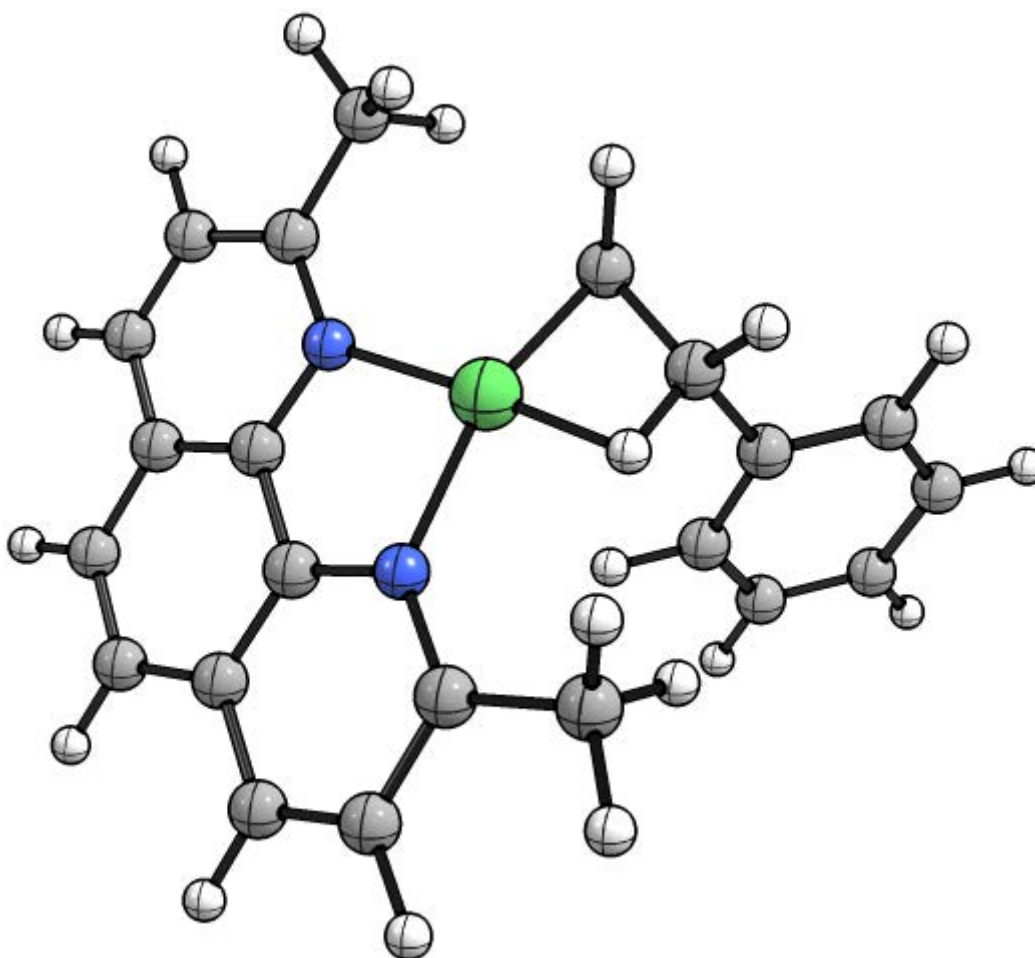

**K-solv**

|    |               |               |               |
|----|---------------|---------------|---------------|
| C  | -0.7023340673 | -3.5119571828 | 0.8554782245  |
| C  | -1.8399438439 | -3.4765718818 | 0.0881669806  |
| C  | -2.3670988223 | -2.2305984642 | -0.3116173815 |
| C  | -1.6625247649 | -1.0910770214 | 0.0935748708  |
| C  | -0.0498337906 | -2.3168682685 | 1.2280733906  |
| C  | -3.571176961  | -2.0761031721 | -1.0751067505 |
| C  | -2.1548048692 | 0.2136881461  | -0.2299255598 |
| C  | -3.3565458761 | 0.340020009   | -0.9350734406 |
| C  | -4.0471253022 | -0.8396574463 | -1.3719607281 |
| C  | -3.8322427922 | 1.6491998354  | -1.1526200163 |
| H  | -4.7571237168 | 1.8060041372  | -1.6995293381 |
| C  | -3.1304253251 | 2.707039247   | -0.6365247295 |
| C  | -1.9219778778 | 2.5054675644  | 0.0677632503  |
| H  | -4.0986715789 | -2.9691784992 | -1.3955654998 |
| H  | -0.2881453414 | -4.4563142305 | 1.1903723132  |
| H  | -2.3448822106 | -4.3934231347 | -0.2011550091 |
| H  | -4.9684210063 | -0.7167586807 | -1.9329238548 |
| H  | -3.4910539314 | 3.7220456201  | -0.7597045304 |
| N  | -1.4265588196 | 1.2760054555  | 0.2334262064  |
| N  | -0.5232786018 | -1.1343688976 | 0.8349300168  |
| C  | -1.2061154796 | 3.6885153765  | 0.6377034786  |
| H  | -0.8219141901 | 3.469741797   | 1.6359516512  |
| H  | -0.3607252536 | 3.9707884109  | 0.0020899417  |
| H  | -1.8851876192 | 4.5422016283  | 0.695227309   |
| C  | 1.1948635863  | -2.354532662  | 2.0601023213  |
| H  | 2.0739889413  | -2.14973915   | 1.4365761562  |
| H  | 1.1559486357  | -1.6026687837 | 2.8540011102  |
| H  | 1.3265205526  | -3.3390605619 | 2.5140390814  |
| Ni | 0.2410034166  | 0.651692906   | 0.8854746051  |
| C  | 2.3021861918  | 0.935831506   | 1.0162872339  |
| H  | 1.6610521682  | 0.0064774886  | 1.3156431111  |
| H  | 2.8273856303  | 1.0927656303  | 1.9618307239  |
| C  | 3.2133998844  | 0.4247645162  | -0.0669562254 |
| C  | 4.5078504416  | 0.9355354832  | -0.1854912894 |
| C  | 2.7765889011  | -0.5373138011 | -0.9790924661 |
| C  | 5.3490826528  | 0.4938489404  | -1.2028462198 |
| H  | 4.855797534   | 1.682715333   | 0.5234887485  |
| C  | 3.6177109639  | -0.9826424614 | -1.9963482146 |
| H  | 1.7723078416  | -0.9459713493 | -0.8826992664 |
| C  | 4.9062562125  | -0.4671023473 | -2.1112726756 |
| H  | 6.3535193031  | 0.8993212186  | -1.2856530071 |
| H  | 3.265706794   | -1.734671093  | -2.6967410991 |
| H  | 5.5651529654  | -0.8137400448 | -2.902101697  |
| C  | 1.4046164388  | 2.0781911815  | 0.6775156107  |
| H  | 1.4967179365  | 2.4581735913  | -0.3424421798 |
| H  | 1.4019950493  | 2.8812561117  | 1.4145608429  |

Energy = -2468.291745  
Zero-point correction = 0.382563 (Hartree/Particle)  
Thermal correction to Gibbs Free Energy = 0.333004  
Sum of electronic and zero-point Energies = -2467.909182  
Sum of electronic and thermal Energies = -2467.888559  
Sum of electronic and thermal Enthalpies = -2467.887614  
Sum of electronic and thermal Free Energies = -2467.958741  
G + ZVPE = -2467.576178

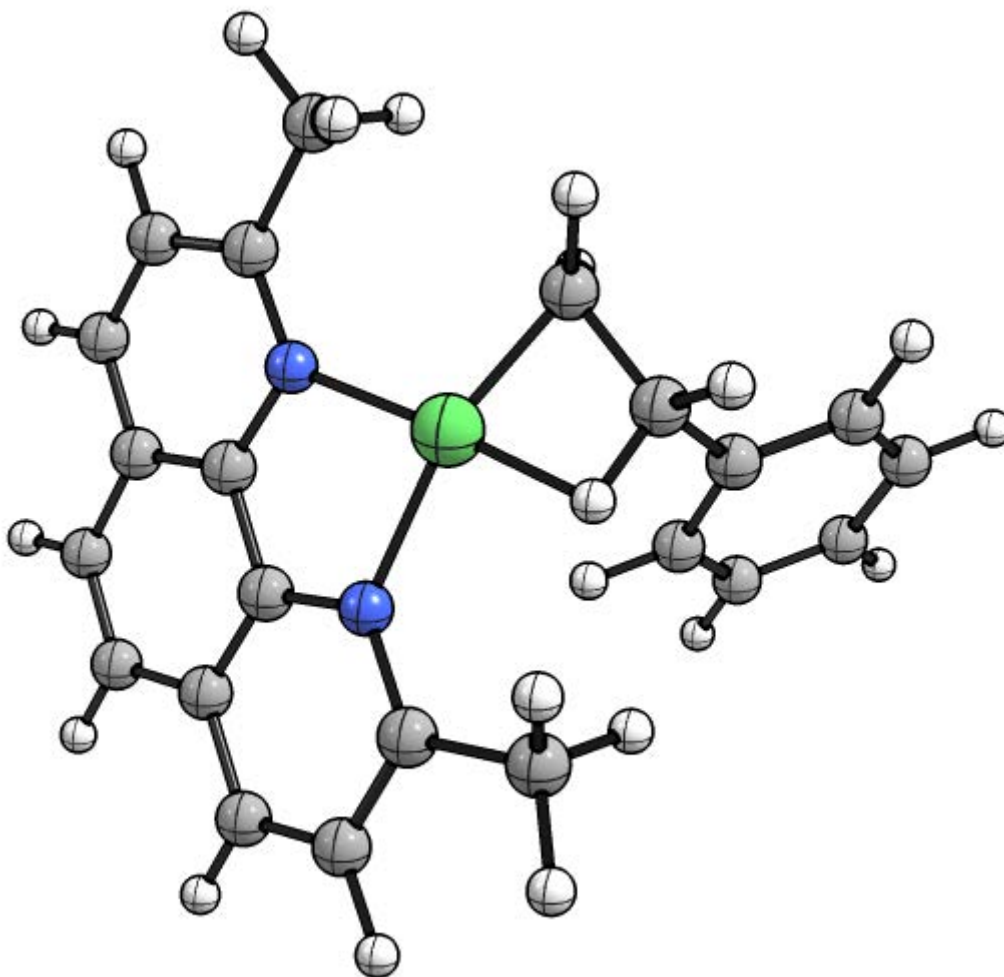

**L**

|    |               |               |               |
|----|---------------|---------------|---------------|
| C  | -0.7814303482 | 3.6032544195  | -0.0260708433 |
| C  | -2.1431053313 | 3.4395194081  | -0.079201775  |
| C  | -2.6913261036 | 2.1396806392  | -0.0671388159 |
| C  | -1.7857782518 | 1.076668526   | 0.0311888802  |
| C  | 0.0717453374  | 2.4868264021  | 0.1021089673  |
| C  | -4.0934689029 | 1.8621004646  | -0.1726456402 |
| C  | -2.2427532573 | -0.2808681924 | -0.0645919093 |
| C  | -3.617554788  | -0.5188363964 | -0.2075026445 |
| C  | -4.537447041  | 0.582119007   | -0.2296132664 |
| C  | -4.0201354142 | -1.8601288561 | -0.3552788133 |
| H  | -5.0737061435 | -2.1036926414 | -0.45425164   |
| C  | -3.0634126603 | -2.8392153162 | -0.4080732708 |
| C  | -1.6931258579 | -2.5190744929 | -0.2875093219 |
| H  | -4.7895934509 | 2.6935960568  | -0.2161470818 |
| H  | -0.3410645282 | 4.592704376   | -0.0704787835 |
| H  | -2.8008383849 | 4.3005419085  | -0.1532413687 |
| H  | -5.5976369358 | 0.3677939453  | -0.3190651547 |
| H  | -3.3438490636 | -3.8752152561 | -0.5592515612 |
| N  | -1.2878984672 | -1.2627344558 | -0.0757253432 |
| N  | -0.4439901959 | 1.2562245866  | 0.1617835382  |
| C  | -0.6872317408 | -3.6198045637 | -0.4664031447 |
| H  | -0.063893034  | -3.421099014  | -1.3437148144 |
| H  | -0.0353797897 | -3.7404637143 | 0.4005804951  |
| H  | -1.1913402428 | -4.5734786484 | -0.6309792934 |
| C  | 1.5578667505  | 2.6623283726  | 0.1727581819  |
| H  | 1.9003387568  | 2.5924940047  | 1.2109554343  |
| H  | 2.0766297781  | 1.8852594553  | -0.3950195105 |
| H  | 1.8465694522  | 3.6411712418  | -0.2164844587 |
| Ni | 0.4088784187  | -0.3699338231 | 0.6230946429  |
| C  | 1.8919620033  | -1.6787492244 | 0.376397928   |
| H  | 1.3003416195  | 0.4436858831  | 1.3760511985  |
| H  | 1.5449189643  | -2.3710986434 | -0.3858619788 |
| C  | 3.067190848   | -0.8882835776 | -0.0351992691 |
| C  | 3.2486961699  | -0.6377306262 | -1.4007922492 |
| C  | 3.9761518451  | -0.3426865818 | 0.8799047391  |
| C  | 4.3023961348  | 0.1551124911  | -1.844385014  |
| H  | 2.5564697952  | -1.0678509308 | -2.1214106585 |
| C  | 5.0302159792  | 0.4432639473  | 0.437554747   |
| H  | 3.8624970269  | -0.539770569  | 1.9415252486  |
| C  | 5.1933318798  | 0.699086755   | -0.9245441176 |
| H  | 4.4322465167  | 0.3391749243  | -2.9059366934 |
| H  | 5.7350450477  | 0.8517127969  | 1.1547101202  |
| H  | 6.0212163032  | 1.3121968717  | -1.2660497404 |
| C  | 1.3655801944  | -1.7911412194 | 1.6524380891  |
| H  | 1.8696406418  | -1.3681636482 | 2.5150600964  |
| H  | 0.675807985   | -2.5964306174 | 1.8895440762  |

Energy = -2468.1874341  
Zero-point correction = 0.380125 (Hartree/Particle)  
Thermal correction to Gibbs Free Energy = 0.329938  
Sum of electronic and zero-point Energies = -2467.807309  
Sum of electronic and thermal Energies = -2467.786126  
Sum of electronic and thermal Enthalpies = -2467.785181  
Sum of electronic and thermal Free Energies = -2467.857496  
G + ZVPE = -2467.477371  
Energy (DMF-6-31G(d)) = -2468.2656356  
Energy (DMF-def2-TZVP) = -2468.8109225

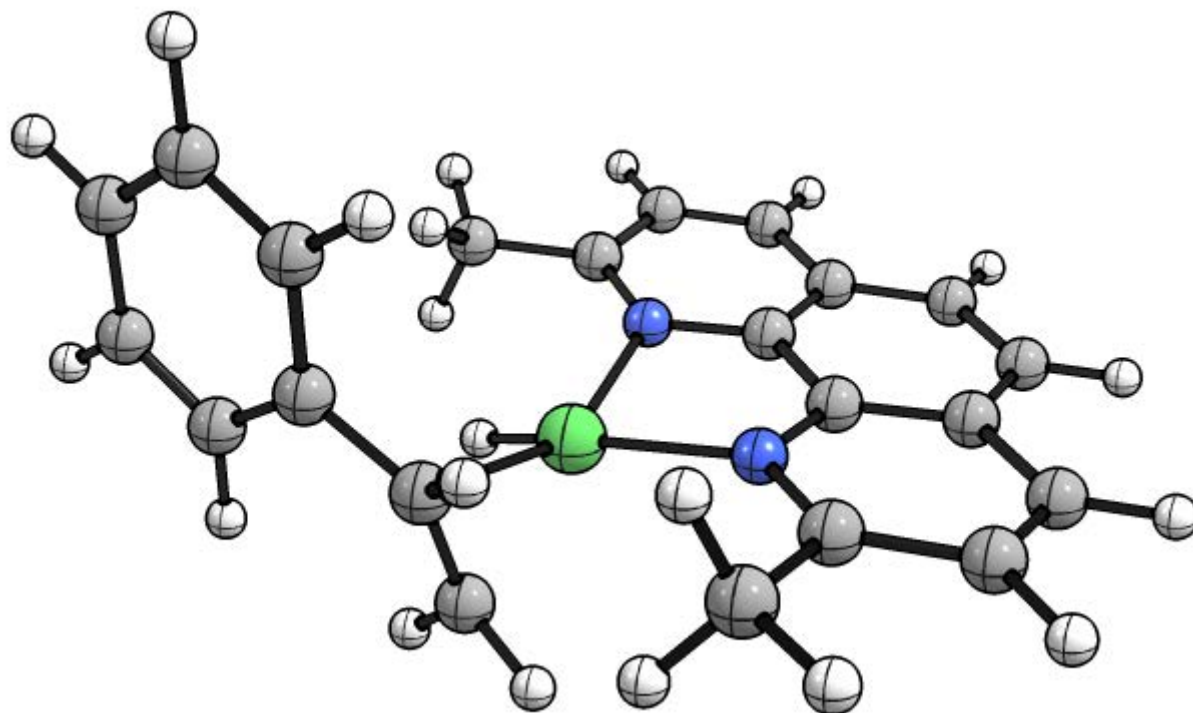

**M**

|    |               |               |               |
|----|---------------|---------------|---------------|
| C  | 4.0371043281  | -1.3105394305 | 0.7467403215  |
| C  | 4.1606268036  | 0.0123564997  | 1.0931573333  |
| C  | 3.1292514545  | 0.9168543102  | 0.7625735417  |
| C  | 2.0114005484  | 0.3814326438  | 0.1121337475  |
| C  | 2.8762479364  | -1.7737657281 | 0.0911367991  |
| C  | 3.1736815804  | 2.3246933371  | 1.032070889   |
| C  | 0.9527049813  | 1.2414914146  | -0.3236116135 |
| C  | 1.0439903411  | 2.618374014   | -0.1004272004 |
| C  | 2.1705809739  | 3.1406922922  | 0.6180024394  |
| C  | 0.0133339625  | 3.4170321443  | -0.6410424711 |
| H  | 0.020864233   | 4.4916719107  | -0.4854225991 |
| C  | -0.964066961  | 2.8246277898  | -1.3964539803 |
| C  | -0.9843315058 | 1.4245378117  | -1.5925402087 |
| H  | 4.0332737201  | 2.72797552    | 1.5577030231  |
| H  | 4.8283417799  | -2.0171153871 | 0.9705508529  |
| H  | 5.0513694889  | 0.3700968266  | 1.6008918792  |
| H  | 2.2154596304  | 4.2087035638  | 0.8061100513  |
| H  | -1.7408031739 | 3.4208053524  | -1.862010187  |
| N  | -0.0687558317 | 0.6478963003  | -1.0128737316 |
| N  | 1.8796760272  | -0.9384078461 | -0.1978646771 |
| C  | -2.0326037531 | 0.8203297256  | -2.4718141262 |
| H  | -1.6797212277 | -0.1092426153 | -2.9201988923 |
| H  | -2.9359124497 | 0.6081055609  | -1.890482228  |
| H  | -2.3017777731 | 1.5184803819  | -3.2680646537 |
| C  | 2.7324297951  | -3.2192069179 | -0.285518598  |
| H  | 2.1495080156  | -3.7596105205 | 0.4704016236  |
| H  | 2.2288686899  | -3.3239434068 | -1.2505248771 |
| H  | 3.7082505491  | -3.7045015879 | -0.3537014715 |
| Ni | 0.0147168184  | -1.2127541764 | -0.6913539307 |
| C  | -1.0141018514 | -2.8894259729 | -0.0682981098 |
| H  | 0.1391639891  | -2.7503676694 | -0.1981237066 |
| H  | -1.1711459251 | -3.8036951889 | -0.6423115968 |
| C  | -1.7791221762 | -1.7111825167 | -0.5718777505 |
| H  | -2.297367261  | -1.9194415354 | -1.5093927847 |
| H  | -1.1087142595 | -3.0799224971 | 1.0023858257  |
| C  | -2.615768573  | -0.9404811571 | 0.3879920393  |
| C  | -3.9652921498 | -0.6986369437 | 0.1105888003  |
| C  | -2.0789730965 | -0.4112033556 | 1.5697020316  |
| C  | -4.754049565  | 0.0490436356  | 0.9797775285  |
| H  | -4.4060641725 | -1.1156244195 | -0.7922301036 |
| C  | -2.8644665043 | 0.3322596783  | 2.4418627121  |
| H  | -1.0326691027 | -0.5840950447 | 1.8176449858  |
| C  | -4.2052748976 | 0.5694732381  | 2.1477261913  |
| H  | -5.8010864692 | 0.2173769875  | 0.7479445489  |
| H  | -2.429209794  | 0.7307500415  | 3.3532153362  |
| H  | -4.8189507525 | 1.1517524059  | 2.8274119816  |

Energy = -2468.2137082  
Zero-point correction = 0.382578 (Hartree/Particle)  
Thermal correction to Gibbs Free Energy = 0.333061  
Sum of electronic and zero-point Energies = -2467.831130  
Sum of electronic and thermal Energies = -2467.810094  
Sum of electronic and thermal Enthalpies = -2467.809150  
Sum of electronic and thermal Free Energies = -2467.880647  
G + ZVPE = -2467.498069  
Energy (DMF-6-31G(d)) = -2468.2958451  
Energy (DMF-def2-TZVP) = -2468.8408315

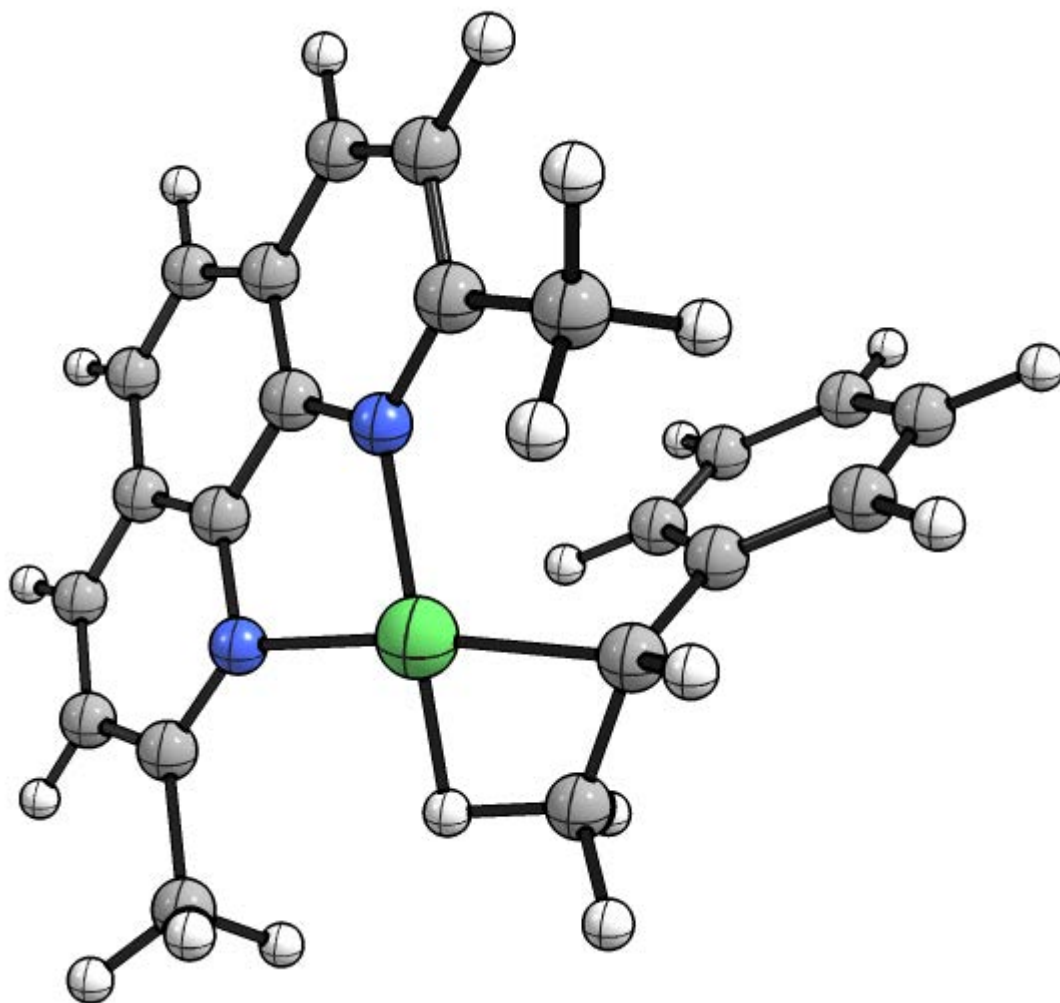

## N

|    |               |               |               |
|----|---------------|---------------|---------------|
| C  | 3.6278988742  | -2.0957848236 | 0.6319414222  |
| C  | 4.0934165038  | -0.8457364335 | 1.0823534397  |
| C  | 3.3246787197  | 0.2806851531  | 0.8481363845  |
| C  | 2.0862017524  | 0.113768551   | 0.1704045498  |
| C  | 2.4067488991  | -2.2034934574 | -0.0073537707 |
| C  | 3.7009947041  | 1.6190779641  | 1.2353757348  |
| C  | 1.2848243816  | 1.2115919181  | -0.1435718199 |
| C  | 1.6875183999  | 2.529489002   | 0.2072522352  |
| C  | 2.9220948813  | 2.6839143047  | 0.9348731434  |
| C  | 0.8879565302  | 3.5814035072  | -0.2012957785 |
| H  | 1.1576470378  | 4.6045798217  | 0.0454514977  |
| C  | -0.2485276273 | 3.3106348222  | -0.973877372  |
| C  | -0.602702106  | 2.0052627542  | -1.2883991165 |
| H  | 4.638250362   | 1.7537333174  | 1.7687495515  |
| H  | 4.2212392744  | -2.9898607008 | 0.7889766639  |
| H  | 5.0484571939  | -0.7618324978 | 1.5927766927  |
| H  | 3.2238583539  | 3.6876283757  | 1.2226932886  |
| H  | -0.8621919873 | 4.1217908375  | -1.3492347942 |
| N  | 0.1200868645  | 0.9466621532  | -0.8547308638 |
| N  | 1.6105658524  | -1.1256263979 | -0.2259812322 |
| C  | -1.8004288827 | 1.7587360794  | -2.15669774   |
| H  | -1.5860215022 | 0.9873226747  | -2.9007232977 |
| H  | -2.6527117146 | 1.4271452636  | -1.5572796284 |
| H  | -2.0872141901 | 2.6774703815  | -2.6745156042 |
| C  | 1.9118411166  | -3.5449795944 | -0.4720534539 |
| H  | 1.0294636488  | -3.8627960703 | 0.0966773988  |
| H  | 1.6379843281  | -3.5149507722 | -1.5334563404 |
| H  | 2.6819081198  | -4.3091911671 | -0.3434464416 |
| Ni | -0.1806958644 | -0.8952394109 | -0.8888315988 |
| C  | -1.4522369153 | -2.516688417  | -0.9472043165 |
| H  | -0.291710972  | -2.5060920615 | -1.0100814858 |
| H  | -1.6911852381 | -3.1287867787 | -1.8194014414 |
| C  | -2.039544362  | -1.1402557453 | -1.0016184658 |
| H  | -2.5504732226 | -0.9488819987 | -1.9458666026 |
| H  | -1.643773913  | -3.0738496965 | -0.0270744932 |
| C  | -2.8300259741 | -0.6837153107 | 0.1726954649  |
| C  | -4.0967269517 | -0.1122190503 | 0.0051805438  |
| C  | -2.3291946348 | -0.785576621  | 1.4791093859  |
| C  | -4.833581899  | 0.3461911891  | 1.0934035329  |
| H  | -4.513974063  | -0.0341455729 | -0.9966420622 |
| C  | -3.065371288  | -0.3380605157 | 2.5686218471  |
| H  | -1.3436325433 | -1.2157325181 | 1.6456057764  |
| C  | -4.3213944486 | 0.2350685802  | 2.3818694422  |
| H  | -5.813430586  | 0.786894124   | 0.9324216612  |
| H  | -2.6505445381 | -0.4279380482 | 3.5685558678  |
| H  | -4.8936667378 | 0.591063102   | 3.2332114023  |



Energy = -2468.3614482  
Zero-point correction = 0.379653 (Hartree/Particle)  
Thermal correction to Gibbs Free Energy = 0.328588  
Sum of electronic and zero-point Energies = -2467.981795  
Sum of electronic and thermal Energies = -2467.960658  
Sum of electronic and thermal Enthalpies = -2467.959714  
Sum of electronic and thermal Free Energies = -2468.032860  
G + ZVPE = -2467.653207  
Energy (DMF-6-31G(d)) = -2468.3869781  
Energy (DMF-def2-TZVP) = -2468.9389918

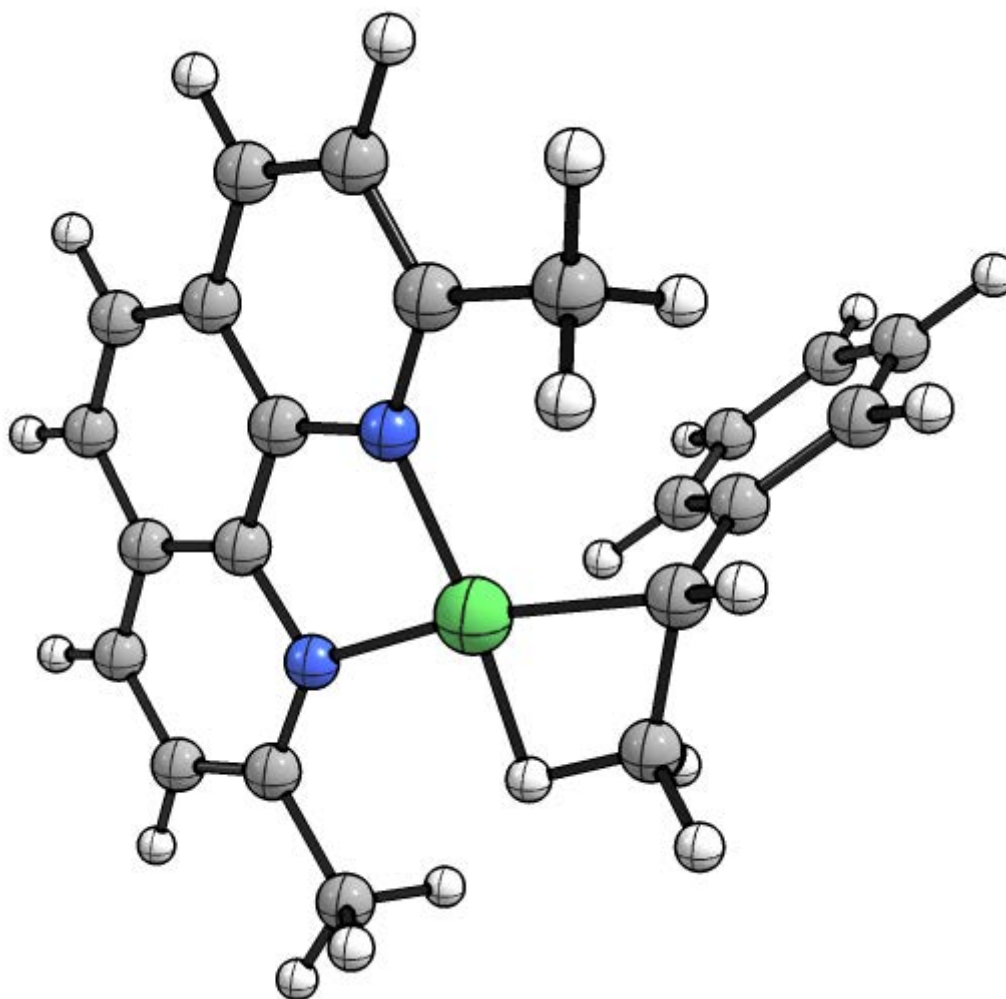

N'

|    |               |               |               |
|----|---------------|---------------|---------------|
| C  | -0.682414302  | 3.4989751292  | -0.7409893506 |
| C  | -1.9116104694 | 3.4484260161  | -0.0599934012 |
| C  | -2.4447728375 | 2.2180595204  | 0.277964842   |
| C  | -1.7049784167 | 1.0529988845  | -0.0677463182 |
| C  | 0.0006001773  | 2.3341179779  | -1.0468742722 |
| C  | -3.7096361362 | 2.0361594588  | 0.9470867703  |
| C  | -2.19767082   | -0.2222634903 | 0.2085364197  |
| C  | -3.4635193355 | -0.3873676906 | 0.8364909563  |
| C  | -4.1910863866 | 0.8003514074  | 1.2119556216  |
| C  | -3.9304787349 | -1.6736227356 | 1.0288957993  |
| H  | -4.8926197501 | -1.8429974849 | 1.5040498941  |
| C  | -3.1565669153 | -2.7520322069 | 0.5743252586  |
| C  | -1.9236564901 | -2.5432772328 | -0.0255424218 |
| H  | -4.2742470718 | 2.9217387398  | 1.2266919156  |
| H  | -0.2572738893 | 4.4521608785  | -1.0347754714 |
| H  | -2.444965548  | 4.3627173994  | 0.1846491848  |
| H  | -5.1507095608 | 0.6755565623  | 1.7066379534  |
| H  | -3.5197921986 | -3.7679067438 | 0.6814849028  |
| N  | -1.4096211634 | -1.2986876232 | -0.190714723  |
| N  | -0.47394899   | 1.1122777388  | -0.6991406887 |
| C  | -1.1446331256 | -3.7252863934 | -0.5230679101 |
| H  | -0.8316882074 | -3.5733690837 | -1.5597601519 |
| H  | -0.2425602832 | -3.8857928417 | 0.0731254062  |
| H  | -1.7548893844 | -4.6303975363 | -0.4714857219 |
| C  | 1.3121042551  | 2.4025455705  | -1.7794977703 |
| H  | 2.1427813531  | 2.0714752693  | -1.1447650336 |
| H  | 1.2942229445  | 1.7705133521  | -2.6753171489 |
| H  | 1.5242157262  | 3.4270002924  | -2.093930158  |
| Ni | 0.2421182123  | -0.6699323293 | -0.801399681  |
| C  | 2.2900480523  | -0.9253781749 | -1.0548876556 |
| H  | 1.6125896695  | -0.0119458936 | -1.329829866  |
| H  | 2.7852513644  | -1.0679989629 | -2.01998992   |
| C  | 3.2335814188  | -0.3987742271 | -0.0071210881 |
| C  | 4.5775852858  | -0.7722666341 | -0.0148157008 |
| C  | 2.7718816282  | 0.4502249962  | 1.000138754   |
| C  | 5.4441650147  | -0.3099036515 | 0.9700890611  |
| H  | 4.9450085477  | -1.432937632  | -0.7961980013 |
| C  | 3.6378385261  | 0.915566187   | 1.9848294124  |
| H  | 1.7268426854  | 0.753527252   | 1.0051833686  |
| C  | 4.9767117818  | 0.5367682345  | 1.9725055526  |
| H  | 6.4885834972  | -0.6073842289 | 0.9519649428  |
| H  | 3.2647231007  | 1.5791300962  | 2.7592225822  |
| H  | 5.655197975   | 0.9007790443  | 2.7381291659  |
| C  | 1.4329398334  | -2.0939268877 | -0.6823715022 |
| H  | 1.6078770448  | -2.4759880221 | 0.3252077311  |
| H  | 1.4285410743  | -2.8954703302 | -1.4215830555 |

Energy = -2468.3596173  
Zero-point correction = 0.379856 (Hartree/Particle)  
Thermal correction to Gibbs Free Energy = 0.329639  
Sum of electronic and zero-point Energies = -2467.979761  
Sum of electronic and thermal Energies = -2467.958924  
Sum of electronic and thermal Enthalpies = -2467.957980  
Sum of electronic and thermal Free Energies = -2468.029978  
G + ZVPE = -2467.650122  
Energy (DMF-6-31G(d)) = -2468.3836449  
Energy (DMF-def2-TZVP) = -2468.9346207

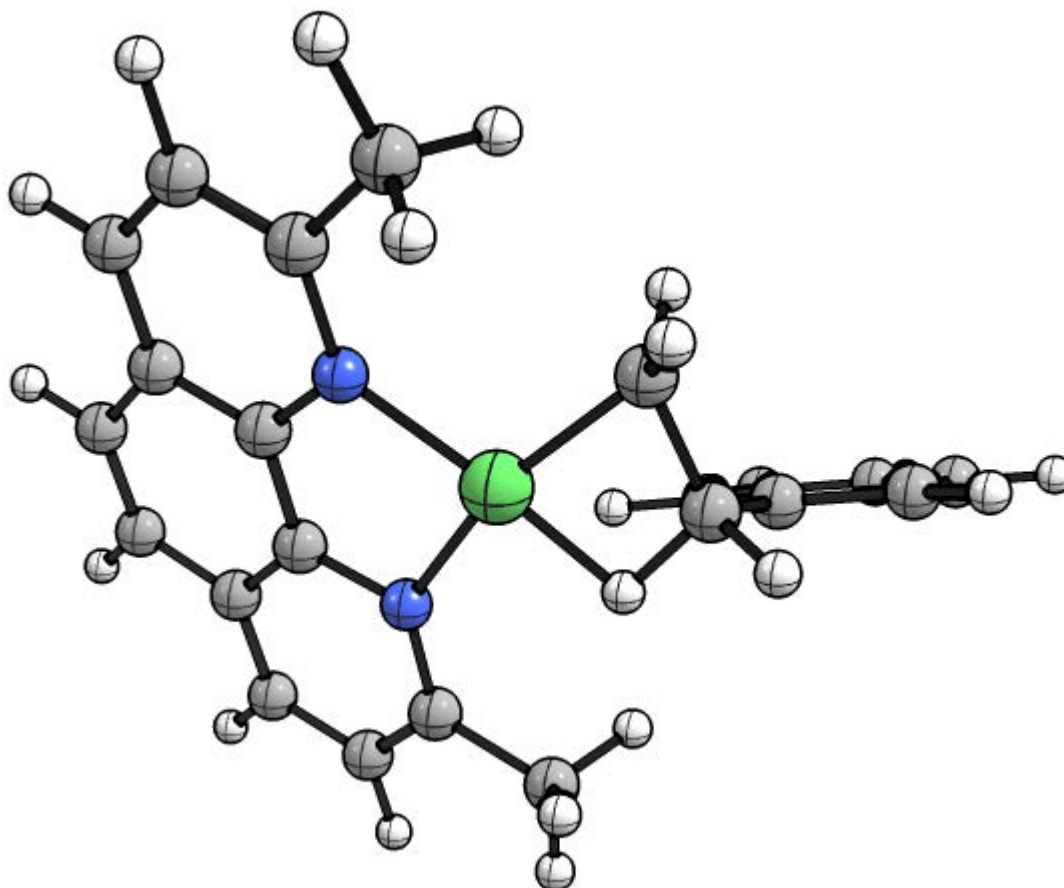

## O

|    |               |               |               |
|----|---------------|---------------|---------------|
| C  | 1.9194077633  | -2.5726440966 | -1.6855935125 |
| C  | 2.8908752305  | -1.6041810754 | -1.6051906979 |
| C  | 2.5302256114  | -0.2801418903 | -1.2906479609 |
| C  | 1.1683941507  | -0.0332575148 | -1.065902114  |
| C  | 0.5740220348  | -2.2408742814 | -1.4310078497 |
| C  | 3.4684558974  | 0.8001922573  | -1.18536389   |
| C  | 0.723805268   | 1.2936954871  | -0.7292028173 |
| C  | 1.6646177905  | 2.3312668451  | -0.6354923653 |
| C  | 3.0521247231  | 2.0520756804  | -0.8743838122 |
| C  | 1.1762149506  | 3.5989403817  | -0.2728993789 |
| H  | 1.8627244386  | 4.4362369997  | -0.1818372467 |
| C  | -0.1663525204 | 3.7607446742  | -0.0287901618 |
| C  | -1.0475940855 | 2.6655854953  | -0.1412063676 |
| H  | 4.5206239525  | 0.5933585616  | -1.356805669  |
| H  | 2.1738605021  | -3.5981030805 | -1.9310019142 |
| H  | 3.9341685817  | -1.8485654716 | -1.7843347569 |
| H  | 3.7656670489  | 2.8667036962  | -0.7914155358 |
| H  | -0.5653763746 | 4.7280409762  | 0.2563472836  |
| N  | -0.5992929453 | 1.461256127   | -0.4886873558 |
| N  | 0.2244137818  | -0.9984139697 | -1.1241757909 |
| C  | -2.5131788185 | 2.8228515006  | 0.128922612   |
| H  | -3.0946809584 | 2.6106917421  | -0.7735692355 |
| H  | -2.846657601  | 2.1121164811  | 0.8901227012  |
| H  | -2.7444235542 | 3.8376365463  | 0.460689004   |
| C  | -0.5180048135 | -3.268483254  | -1.4531640338 |
| H  | -0.7560227618 | -3.5759032922 | -0.4279379948 |
| H  | -1.4276358214 | -2.8516257071 | -1.894849718  |
| H  | -0.2221387982 | -4.159212223  | -2.0127241211 |
| Ni | -1.5625804388 | -0.3594773572 | -0.3570104277 |
| C  | -2.1639014875 | -1.9242243872 | 2.0002162029  |
| H  | -3.2377201402 | -1.7640807004 | 1.866665433   |
| H  | -1.9865049251 | -2.1927135831 | 3.0519759131  |
| C  | -1.3909297089 | -0.6656656952 | 1.5932431836  |
| H  | -1.8557824274 | 0.1949940177  | 2.0899639854  |
| H  | -1.8993914608 | -2.8074187723 | 1.4026043901  |
| C  | 0.0565011015  | -0.6830884791 | 1.9436011367  |
| C  | 0.7333051683  | 0.5074319084  | 2.2591108975  |
| C  | 0.8345543899  | -1.852536502  | 1.8942713644  |
| C  | 2.1078429941  | 0.5411250245  | 2.4624067102  |
| H  | 0.16109425    | 1.4312049047  | 2.3268040821  |
| C  | 2.210352229   | -1.8251356638 | 2.0959101698  |
| H  | 0.3529989528  | -2.8037843039 | 1.6825436526  |
| C  | 2.8623625116  | -0.6259120671 | 2.3712974129  |
| H  | 2.5928753086  | 1.4868492059  | 2.6908106109  |
| H  | 2.7770605955  | -2.7512376474 | 2.0384617448  |
| H  | 3.9370938627  | -0.6027008148 | 2.5263689732  |
| O  | -4.3939993132 | 0.091163303   | 0.1345611904  |
| C  | -3.4104534609 | -0.2032775106 | -0.4895109666 |
| O  | -3.0611641493 | -0.6016555099 | -1.6353474645 |

Energy = -2656.9292707  
Zero-point correction = 0.393168 (Hartree/Particle)  
Thermal correction to Gibbs Free Energy = 0.338668  
Sum of electronic and zero-point Energies = -2656.536103  
Sum of electronic and thermal Energies = -2656.511117  
Sum of electronic and thermal Enthalpies = -2656.510173  
Sum of electronic and thermal Free Energies = -2656.590603  
G + ZVPE = -2656.197435  
Energy (DMF-6-31G(d)) = -2656.9642374  
Energy (DMF-def2-TZVP) = -2657.5788187

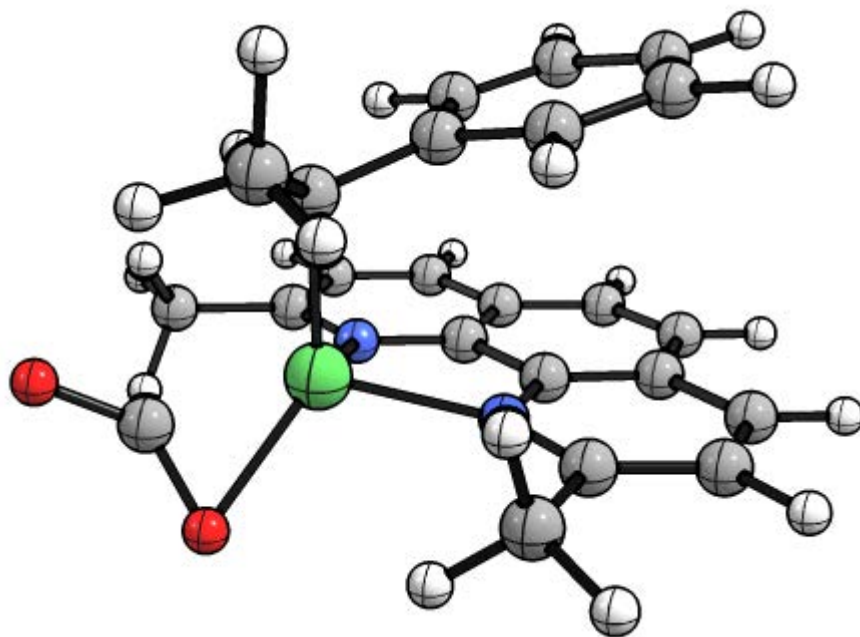

## O'

|    |               |               |               |
|----|---------------|---------------|---------------|
| C  | 2.1203106579  | 3.4500967662  | 0.7371486777  |
| C  | 3.0568616052  | 3.172896382   | -0.23093934   |
| C  | 3.1537346054  | 1.8684022243  | -0.7542623374 |
| C  | 2.2664659579  | 0.9125874856  | -0.2338103661 |
| C  | 1.2613966217  | 2.4316463799  | 1.1975259328  |
| C  | 4.089732716   | 1.4776128728  | -1.7702651309 |
| C  | 2.3048845831  | -0.4440084996 | -0.7144548602 |
| C  | 3.2220700312  | -0.7929570396 | -1.717558774  |
| C  | 4.1191591493  | 0.2029857683  | -2.2332321158 |
| C  | 3.1972476937  | -2.1295658773 | -2.1614731463 |
| H  | 3.8863777942  | -2.4543404144 | -2.9360939098 |
| C  | 2.2964424551  | -3.006450745  | -1.6098705982 |
| C  | 1.4086376505  | -2.5766233134 | -0.5986045175 |
| H  | 4.7729068795  | 2.2250763149  | -2.1627864371 |
| H  | 2.0301272302  | 4.4469881713  | 1.154817522   |
| H  | 3.7234109523  | 3.9497688898  | -0.5951676491 |
| H  | 4.8259257208  | -0.0878643932 | -3.0048455917 |
| H  | 2.254835643   | -4.0386980617 | -1.940048368  |
| N  | 1.4278052587  | -1.3194708252 | -0.1655549805 |
| N  | 1.3462556853  | 1.1986667277  | 0.7130101958  |
| C  | 0.4281328468  | -3.5241203866 | 0.0231324645  |
| H  | 0.7088828782  | -3.7416327885 | 1.0587058755  |
| H  | -0.5685864059 | -3.0778245317 | 0.0598410743  |
| H  | 0.386451633   | -4.4657058148 | -0.5292526904 |
| C  | 0.2049892999  | 2.6728572104  | 2.2345494125  |
| H  | -0.7879970458 | 2.5788633894  | 1.7801222629  |
| H  | 0.2759202648  | 1.9214639502  | 3.0276286232  |
| H  | 0.2913419942  | 3.6672252711  | 2.6782761967  |
| Ni | 0.1409851287  | -0.3928902893 | 1.1734033633  |
| C  | -2.7000199242 | 0.2249871537  | 0.6819376562  |
| H  | -2.9735225132 | -0.5569021467 | 1.3990593631  |
| C  | -1.3820948414 | -0.1569993264 | -0.0099076702 |
| H  | -1.5624565584 | -1.0700438994 | -0.5955576898 |
| H  | -2.5721678901 | 1.149543726   | 1.2637121583  |
| O  | -1.3722646075 | -2.4067898416 | 2.6287008438  |
| C  | -0.5272191402 | -1.5741919574 | 2.4317085053  |
| O  | 0.4324486838  | -1.0046845662 | 3.0306574113  |
| H  | -1.1349433829 | 0.6234833924  | -0.7493612886 |
| C  | -3.8292559404 | 0.4271465362  | -0.300635734  |
| C  | -4.6599471462 | -0.636277315  | -0.6633410832 |
| C  | -4.0359208074 | 1.6639521015  | -0.917046248  |
| C  | -5.6634820854 | -0.4715232898 | -1.6135005739 |
| H  | -4.5135447045 | -1.6048562684 | -0.1904069297 |
| C  | -5.0373701693 | 1.836570252   | -1.8677406311 |
| H  | -3.3983032505 | 2.5032012669  | -0.6448651626 |
| C  | -5.8562973266 | 0.7668785941  | -2.2202514729 |
| H  | -6.3005285225 | -1.3113141036 | -1.8781513566 |
| H  | -5.1818691659 | 2.8084911235  | -2.3321281287 |
| H  | -6.6404955626 | 0.898017115   | -2.9604928898 |

Energy = -2656.9102785  
Zero-point correction = 0.393159 (Hartree/Particle)  
Thermal correction to Gibbs Free Energy = 0.335455  
Sum of electronic and zero-point Energies = -2656.517120  
Sum of electronic and thermal Energies = -2656.492005  
Sum of electronic and thermal Enthalpies = -2656.491061  
Sum of electronic and thermal Free Energies = -2656.574823  
G + ZVPE = -2656.181664  
Energy (DMF-6-31G(d)) = -2656.9500187  
Energy (DMF-def2-TZVP) = -2657.5667139

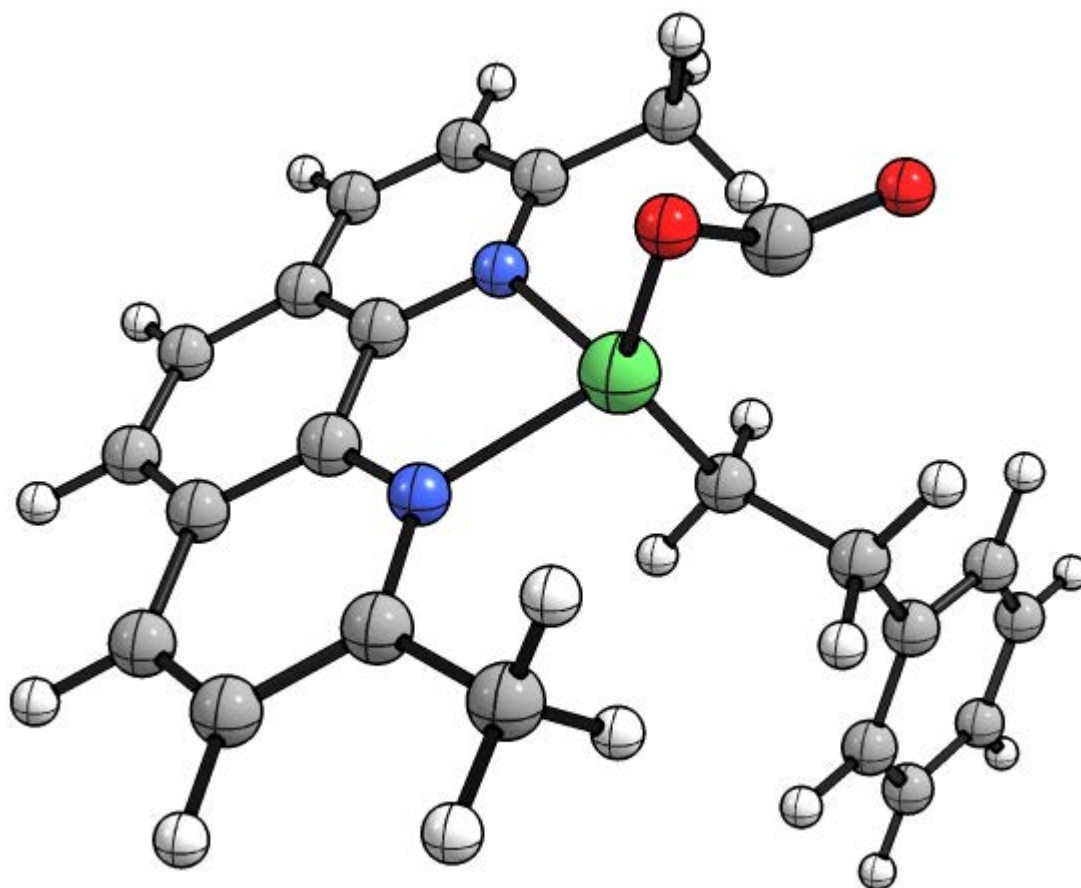

## Q

|   |               |               |               |
|---|---------------|---------------|---------------|
| C | 0.4756933681  | -0.220727989  | 0.1875657683  |
| C | -0.4133042891 | -1.2780167126 | -0.0071674535 |
| C | -0.033691395  | 1.0806695184  | 0.2202103012  |
| C | -1.7775446884 | -1.0458269617 | -0.1636468209 |
| H | -0.0330170347 | -2.2964646646 | -0.0405063742 |
| C | -1.3948517217 | 1.3177298957  | 0.0641087541  |
| H | 0.6504841038  | 1.9132902102  | 0.36591528    |
| C | -2.2730602997 | 0.2535709057  | -0.1283820612 |
| H | -2.4534940907 | -1.8823241676 | -0.316686781  |
| H | -1.7725344386 | 2.3359414749  | 0.0928163187  |
| H | -3.3360741963 | 0.4370912666  | -0.2533490682 |
| C | 2.8254858877  | 0.3753591251  | -0.5021499605 |
| H | 2.471955533   | 0.6974129886  | -1.4764230125 |
| H | 3.8705861991  | 0.53247584    | -0.2566234464 |
| C | 1.9591873159  | -0.4668122495 | 0.3730165196  |
| H | 2.166159402   | -1.536836301  | 0.1975951163  |
| H | 2.2284494333  | -0.2962598692 | 1.4259316803  |

Energy = -310.0989848

Zero-point correction = 0.143646 (Hartree/Particle)

Thermal correction to Gibbs Free Energy = 0.111122

Sum of electronic and zero-point Energies = -309.955339

Sum of electronic and thermal Energies = -309.947832

Sum of electronic and thermal Enthalpies = -309.946888

Sum of electronic and thermal Free Energies = -309.987863

G + ZVPE = -309.844217

Energy (DMF-6-31G(d)) = -310.1068822

Energy (DMF-def2-TZVP) = -310.2152399

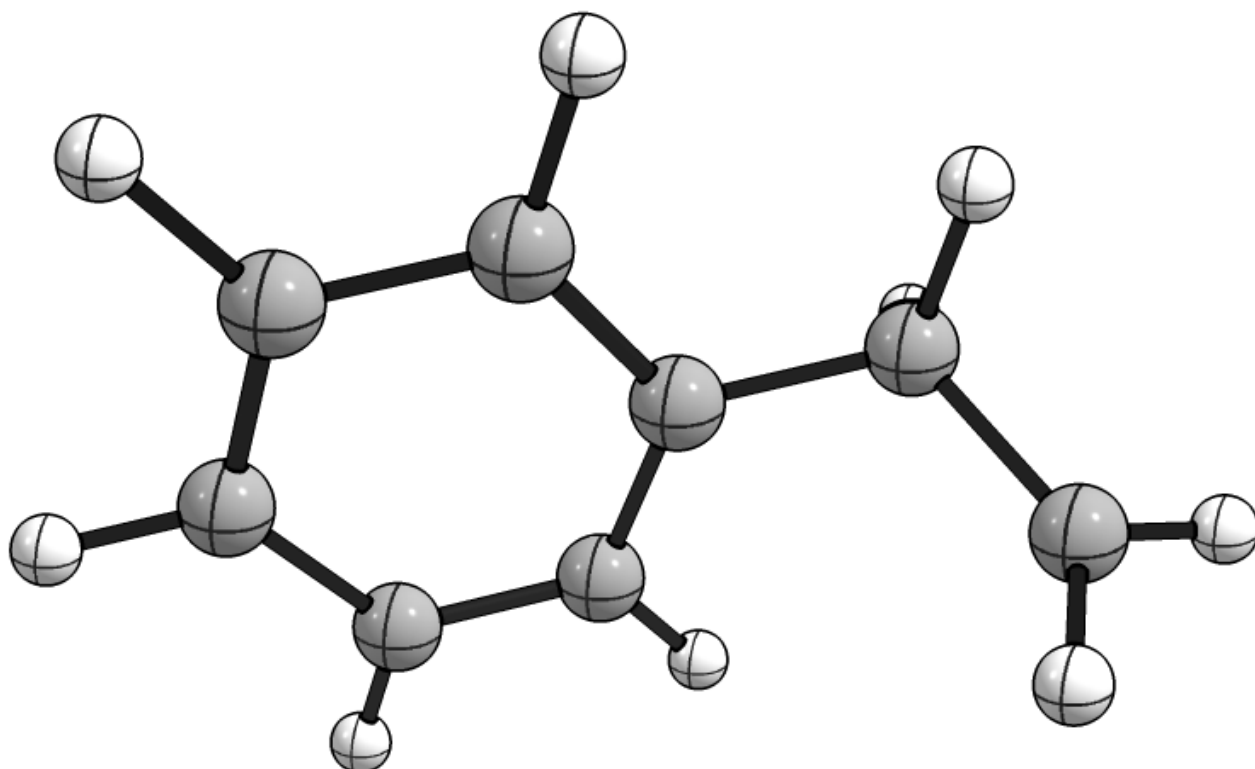



## TS<sub>Q-R</sub>

|   |               |               |               |
|---|---------------|---------------|---------------|
| C | 1.8762243842  | 0.5869378534  | 0.0196027758  |
| H | 2.510090842   | 0.3116713431  | -1.033833155  |
| H | 2.1444852349  | 1.6051868454  | 0.2901919371  |
| C | 0.4580845345  | 0.2522278068  | 0.0255297816  |
| C | -0.4943281911 | 1.2890439454  | 0.0078101874  |
| C | -0.0144799208 | -1.0716742944 | 0.0281376749  |
| C | -1.8531212693 | 1.0154313774  | -0.0085197306 |
| H | -0.1515397941 | 2.3212656922  | 0.0091661731  |
| C | -1.3779881776 | -1.3414184817 | 0.0054476547  |
| H | 0.6875031188  | -1.8991312061 | 0.0634990938  |
| C | -2.3064598431 | -0.3043993069 | -0.0141831586 |
| H | -2.5662049625 | 1.8349539543  | -0.0170833873 |
| H | -1.7178703483 | -2.3734463063 | 0.0110634998  |
| H | -3.370622557  | -0.5189000824 | -0.0297044862 |
| C | 2.9921330777  | -0.3890067625 | 0.0183051107  |
| H | 2.8039233134  | -1.4484106836 | -0.0971905224 |
| H | 3.9798476028  | -0.0560424101 | 0.3111090707  |

Energy = -310.040865

Zero-point correction = 0.140042 (Hartree/Particle)

Thermal correction to Gibbs Free Energy = 0.108180

Sum of electronic and zero-point Energies = -309.900823

Sum of electronic and thermal Energies = -309.893773

Sum of electronic and thermal Enthalpies = -309.892829

Sum of electronic and thermal Free Energies = -309.932685

G + ZVPE = -309.792643

Energy (DMF-6-31G(d)) = -310.0516539

Energy (DMF-def2-TZVP) = -310.1641138

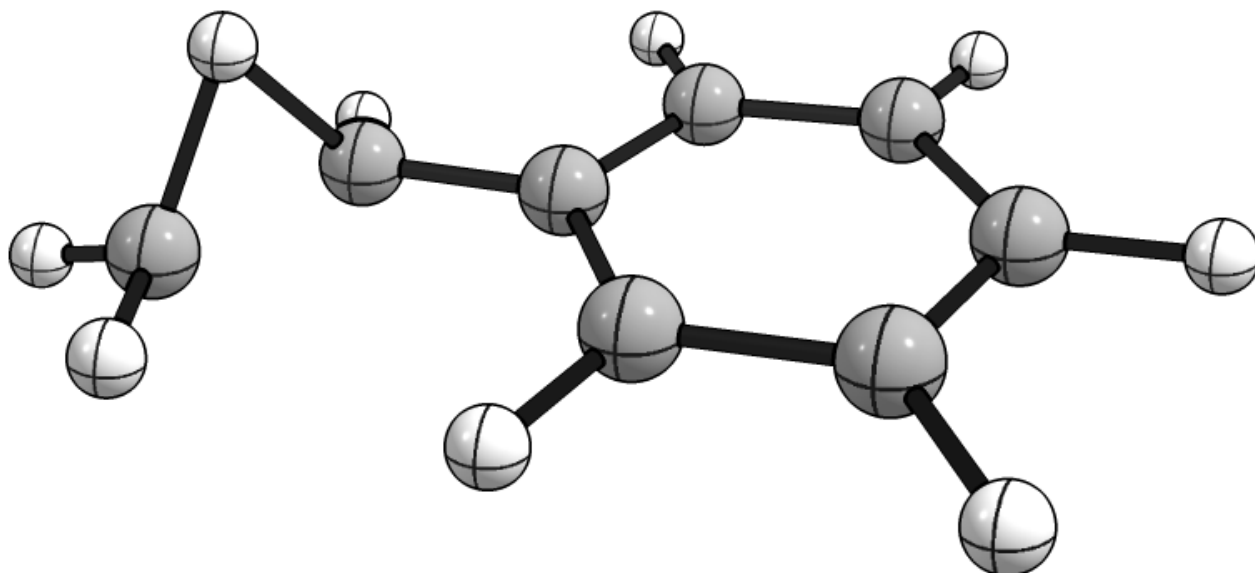

**P**

|    |               |               |               |
|----|---------------|---------------|---------------|
| C  | 2.1982763965  | -3.0159595435 | 1.3690206632  |
| C  | 3.4504513539  | -2.4256680878 | 1.5888377618  |
| C  | 3.663343324   | -1.11646703   | 1.1511668226  |
| C  | 2.5963392949  | -0.4698011427 | 0.4969011042  |
| C  | 1.1866174218  | -2.3281635103 | 0.7210296151  |
| C  | 4.8902940892  | -0.3781994395 | 1.3226966128  |
| C  | 2.7311021167  | 0.8573948305  | 0.0397466628  |
| C  | 3.9369157653  | 1.5705628922  | 0.2178248724  |
| C  | 5.0233111081  | 0.8979100358  | 0.8796625368  |
| C  | 3.9736366909  | 2.8805060501  | -0.2612242212 |
| H  | 4.8761395695  | 3.4752379799  | -0.1486223178 |
| C  | 2.8495244847  | 3.4184702118  | -0.8788862056 |
| C  | 1.6898116292  | 2.6522523166  | -1.021980642  |
| H  | 5.7187356352  | -0.8721708043 | 1.8232390298  |
| H  | 2.0076226933  | -4.0289854774 | 1.7082520971  |
| H  | 4.239222607   | -2.9719559286 | 2.0969509794  |
| H  | 5.9564180541  | 1.4362802865  | 1.0206991382  |
| H  | 2.8603454066  | 4.4363501336  | -1.2531901116 |
| N  | 1.6312277968  | 1.3917340733  | -0.5719674603 |
| N  | 1.3760775983  | -1.0596948987 | 0.2625248951  |
| C  | 0.4499876631  | 3.176651319   | -1.6859458228 |
| H  | 0.2524091667  | 2.6219992252  | -2.6109482811 |
| H  | -0.4168999452 | 3.0367899361  | -1.0320878004 |
| H  | 0.5454141177  | 4.2358798345  | -1.9356043299 |
| C  | -0.1772809287 | -2.8983384195 | 0.475616674   |
| H  | -0.9403565993 | -2.319802463  | 1.01143741    |
| H  | -0.4300787164 | -2.8418784202 | -0.5894693795 |
| H  | -0.249550928  | -3.9387031176 | 0.801523307   |
| Ni | 0.1498856108  | 0.0987214641  | -0.5897342461 |
| O  | -1.4140149787 | -0.5235961201 | -1.7405151344 |
| O  | -1.648582862  | 0.9168992572  | -0.104504567  |
| C  | -2.166154533  | 0.1462370794  | -0.9644744533 |
| C  | -3.670833047  | -0.0363515626 | -1.0179074245 |
| H  | -4.1082217979 | 0.8279696034  | -0.5100806159 |
| C  | -4.1849913981 | -0.1058137282 | -2.45946244   |
| H  | -5.2662412119 | -0.2721545306 | -2.4637405622 |
| H  | -3.9744466042 | 0.8275968226  | -2.9914966256 |
| H  | -3.7020974385 | -0.9190441203 | -3.0066731945 |
| C  | -4.0134834922 | -1.2838563988 | -0.2135544006 |
| C  | -4.769965714  | -1.1866824592 | 0.9541188541  |
| C  | -3.5624117319 | -2.5432259898 | -0.620147966  |
| C  | -5.0762715979 | -2.3218554173 | 1.7003079975  |
| H  | -5.1192529725 | -0.212209343  | 1.2852291877  |
| C  | -3.8654370632 | -3.6777526123 | 0.124634205   |
| H  | -2.9523450259 | -2.6277698523 | -1.5143632777 |
| C  | -4.6244133953 | -3.5710721709 | 1.2878855553  |
| H  | -5.6665480081 | -2.2267646643 | 2.6070492613  |
| H  | -3.5041485115 | -4.648315023  | -0.2030098392 |
| H  | -4.8594547726 | -4.457317116  | 1.8699129757  |

Energy = -2656.9584028  
Zero-point correction = 0.394130 (Hartree/Particle)  
Thermal correction to Gibbs Free Energy = 0.336197  
Sum of electronic and zero-point Energies = -2656.564273  
Sum of electronic and thermal Energies = -2656.539268  
Sum of electronic and thermal Enthalpies = -2656.538324  
Sum of electronic and thermal Free Energies = -2656.622206  
G + ZVPE = -2656.228076  
Energy (DMF-6-31G(d)) = -2656.9853242  
Energy (DMF-def2-TZVP) = -2657.6103402

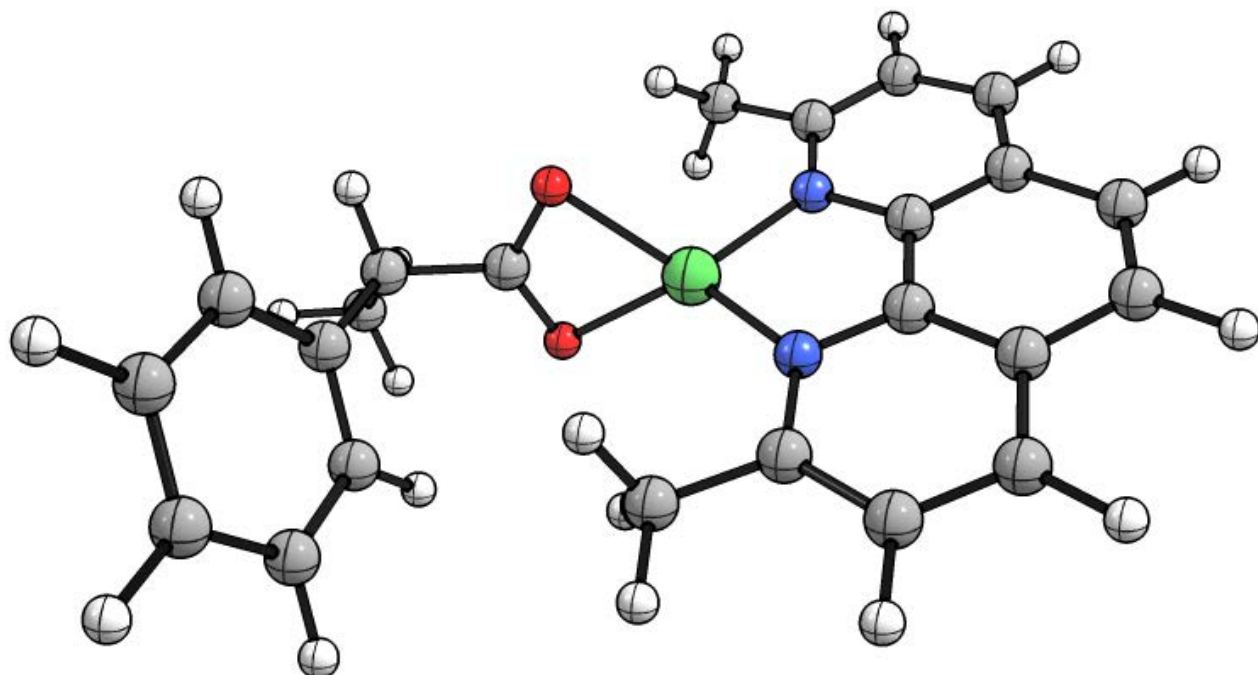

**P'**

|    |               |               |               |
|----|---------------|---------------|---------------|
| C  | 1.8088282803  | 3.9460811149  | 0.0839298002  |
| C  | 3.1645622876  | 3.5810273046  | 0.0897226618  |
| C  | 3.4948446311  | 2.2229111098  | 0.0585776067  |
| C  | 2.4361926919  | 1.2942650987  | 0.0227278059  |
| C  | 0.8129942072  | 2.9900406931  | 0.0467531114  |
| C  | 4.8403950361  | 1.7055326912  | 0.0626576657  |
| C  | 2.6958181865  | -0.0909844602 | -0.0044155542 |
| C  | 4.0204804358  | -0.5838523587 | 0.0014086611  |
| C  | 5.0935448461  | 0.3716461983  | 0.0347850501  |
| C  | 4.1787148445  | -1.9702329914 | -0.0242038561 |
| H  | 5.1763685206  | -2.4014545895 | -0.0222682821 |
| C  | 3.0583734822  | -2.7911151507 | -0.0516118383 |
| C  | 1.7755210843  | -2.2325271512 | -0.0544750898 |
| H  | 5.6619012442  | 2.4162053177  | 0.0905076602  |
| H  | 1.5268483195  | 4.9938832217  | 0.1084893832  |
| H  | 3.9433622174  | 4.3365465032  | 0.1198449133  |
| H  | 6.1162695917  | 0.0049093819  | 0.0384077243  |
| H  | 3.1638442365  | -3.8702841601 | -0.070006326  |
| N  | 1.5977995241  | -0.90678364   | -0.0329254262 |
| N  | 1.1061893595  | 1.656557614   | 0.0149018975  |
| C  | 0.5340744966  | -3.0760222133 | -0.0787871219 |
| H  | -0.0798235344 | -2.8633912119 | 0.8031184213  |
| H  | -0.0684300582 | -2.8339397236 | -0.9608791312 |
| H  | 0.7747415937  | -4.141438071  | -0.0958033525 |
| C  | -0.6502462225 | 3.3125205964  | 0.0343512188  |
| H  | -1.1192766914 | 2.9234274447  | -0.8790636701 |
| H  | -1.1536150418 | 2.8377571479  | 0.8870541429  |
| H  | -0.8325402532 | 4.3886685204  | 0.0830427918  |
| Ni | -0.0559665172 | 0.1761701088  | -0.0380755564 |
| O  | -1.5923075708 | -0.631641528  | 1.0207558461  |
| O  | -1.595121891  | -0.5293234694 | -1.1640829496 |
| C  | -2.1718482136 | -0.8619151518 | -0.0850377221 |
| C  | -3.6495286834 | -2.6550347004 | 0.9171393345  |
| H  | -2.9345522518 | -3.4464457226 | 0.6618757337  |
| H  | -3.3592162046 | -2.2700638554 | 1.8993292396  |
| C  | -3.5295584409 | -1.5166505175 | -0.1070723759 |
| H  | -3.7391994395 | -1.8661210955 | -1.1214472928 |
| H  | -4.2712301434 | -0.7420846193 | 0.1269849175  |
| C  | -5.0494960282 | -3.2175053469 | 0.9584352347  |
| C  | -5.4181678428 | -4.2931452725 | 0.1483318968  |
| C  | -6.0217865652 | -2.6354039293 | 1.7754824893  |
| C  | -6.7237479033 | -4.7757960332 | 0.1521273195  |
| H  | -4.6718092589 | -4.7587634122 | -0.4916563234 |
| C  | -7.3284238769 | -3.1127809763 | 1.7823261818  |
| H  | -5.747471935  | -1.7986145211 | 2.4141708098  |
| C  | -7.6840432655 | -4.1855254264 | 0.9688469964  |
| H  | -6.9916504807 | -5.6155242851 | -0.4826811289 |
| H  | -8.070005073  | -2.6482568621 | 2.4259857096  |
| H  | -8.7033065499 | -4.5600758247 | 0.9724137922  |

Energy = -2656.9564377  
Zero-point correction = 0.394179 (Hartree/Particle)  
Thermal correction to Gibbs Free Energy = 0.335320  
Sum of electronic and zero-point Energies = -2656.562258  
Sum of electronic and thermal Energies = -2656.537402  
Sum of electronic and thermal Enthalpies = -2656.536457  
Sum of electronic and thermal Free Energies = -2656.621118  
G + ZVPE = -2656.226939  
Energy (DMF-6-31G(d)) = -2656.9860386  
Energy (DMF-def2-TZVP) = -2657.6086172

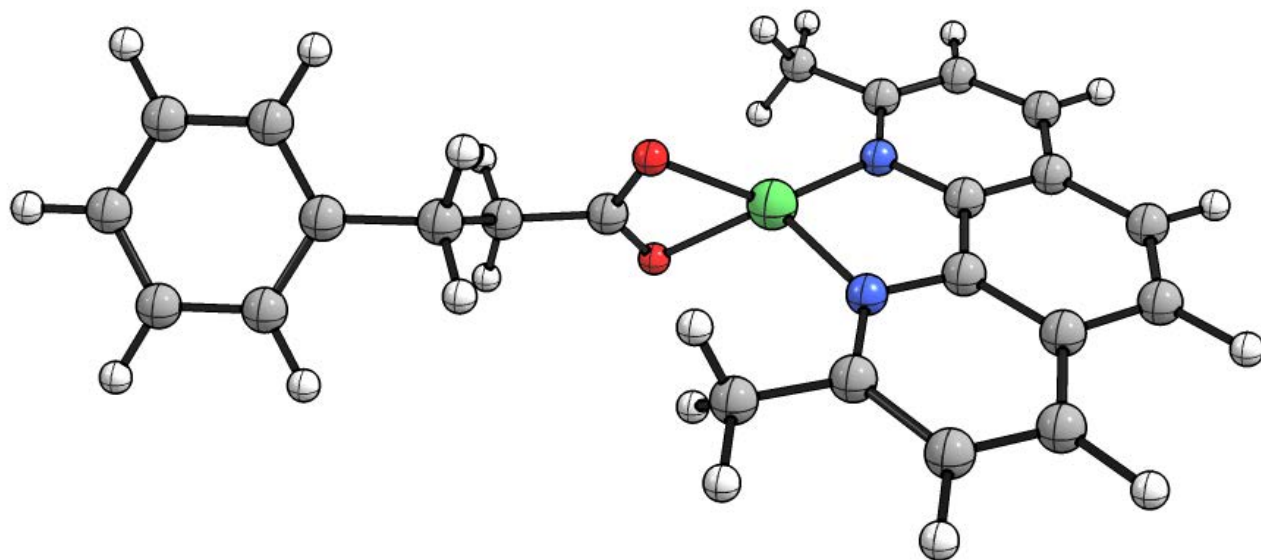

**TS<sub>K-L</sub>**

|    |               |               |               |
|----|---------------|---------------|---------------|
| C  | -1.0345667375 | 3.5969509506  | -0.2569352524 |
| C  | -2.3152732472 | 3.4124081674  | 0.2005122162  |
| C  | -2.8151239629 | 2.1018384203  | 0.3517648756  |
| C  | -1.931722389  | 1.058184038   | 0.0558954973  |
| C  | -0.2013167619 | 2.4928272399  | -0.5419188168 |
| C  | -4.1572536905 | 1.7903885918  | 0.7513137302  |
| C  | -2.3851998877 | -0.2987165162 | 0.1047983856  |
| C  | -3.7194781231 | -0.574925806  | 0.4200949953  |
| C  | -4.5925819456 | 0.5045280019  | 0.7813946129  |
| C  | -4.1265240102 | -1.922975783  | 0.3164207604  |
| H  | -5.1473916303 | -2.2016706377 | 0.5600826234  |
| C  | -3.2357563742 | -2.8562172614 | -0.1470471552 |
| C  | -1.903793813  | -2.4938189709 | -0.4527450344 |
| H  | -4.8264068593 | 2.6056195362  | 1.0074665566  |
| H  | -0.6415547147 | 4.5958827837  | -0.4078787633 |
| H  | -2.9512191174 | 4.2639282062  | 0.4237798124  |
| H  | -5.6168683468 | 0.274984162   | 1.057312208   |
| H  | -3.5390934504 | -3.8870492248 | -0.2948734286 |
| N  | -1.4749929641 | -1.2474616448 | -0.2638383617 |
| N  | -0.6468164348 | 1.2470483892  | -0.3619400918 |
| C  | -0.9855615359 | -3.5167712952 | -1.0547604837 |
| H  | -0.1041190316 | -3.0484787503 | -1.495391105  |
| H  | -0.6693456306 | -4.2619283873 | -0.3169381825 |
| H  | -1.5136771992 | -4.0558205798 | -1.847045082  |
| C  | 1.1906927257  | 2.7082271981  | -1.0557011279 |
| H  | 1.9236643007  | 2.6036865577  | -0.2476199958 |
| H  | 1.4379436484  | 1.9708897417  | -1.8228036963 |
| H  | 1.2953522192  | 3.7091126159  | -1.4803560692 |
| Ni | 0.3023304748  | -0.4023884857 | -0.1776971547 |
| C  | 2.1250231873  | -1.3312542046 | -0.2159361962 |
| H  | 1.4835947819  | 0.382251916   | -0.1667801321 |
| H  | 2.0886047726  | -1.7533229458 | -1.2242952721 |
| C  | 3.4354212163  | -0.6820351783 | 0.0802165448  |
| C  | 4.0995520172  | 0.0074391532  | -0.9394576013 |
| C  | 4.0343850081  | -0.7751057122 | 1.3366466844  |
| C  | 5.3289692219  | 0.6083598464  | -0.705140484  |
| H  | 3.6447468181  | 0.0745692196  | -1.925682953  |
| C  | 5.2668160782  | -0.1724907336 | 1.5730377002  |
| H  | 3.5549538968  | -1.337884414  | 2.1316639115  |
| C  | 5.9145812748  | 0.5220177749  | 0.5566081676  |
| H  | 5.8347221897  | 1.1368017633  | -1.5070999921 |
| H  | 5.7272078275  | -0.258717979  | 2.5520745658  |
| H  | 6.8784099314  | 0.9851860318  | 0.7416139543  |
| C  | 1.2422857414  | -1.8616769482 | 0.7253425542  |
| H  | 1.3840086532  | -1.630516066  | 1.7803361881  |
| H  | 0.7424353273  | -2.800838967  | 0.5319769264  |

Energy = -2468.1750505  
Zero-point correction = 0.378383 (Hartree/Particle)  
Thermal correction to Gibbs Free Energy = 0.328397  
Sum of electronic and zero-point Energies = -2467.796668  
Sum of electronic and thermal Energies = -2467.775771  
Sum of electronic and thermal Enthalpies = -2467.774827  
Sum of electronic and thermal Free Energies = -2467.846653  
G + ZVPE = -2467.468270  
Energy (DMF-6-31G(d)) = -2468.2548099  
Energy (DMF-def2-TZVP) = -2468.8041208

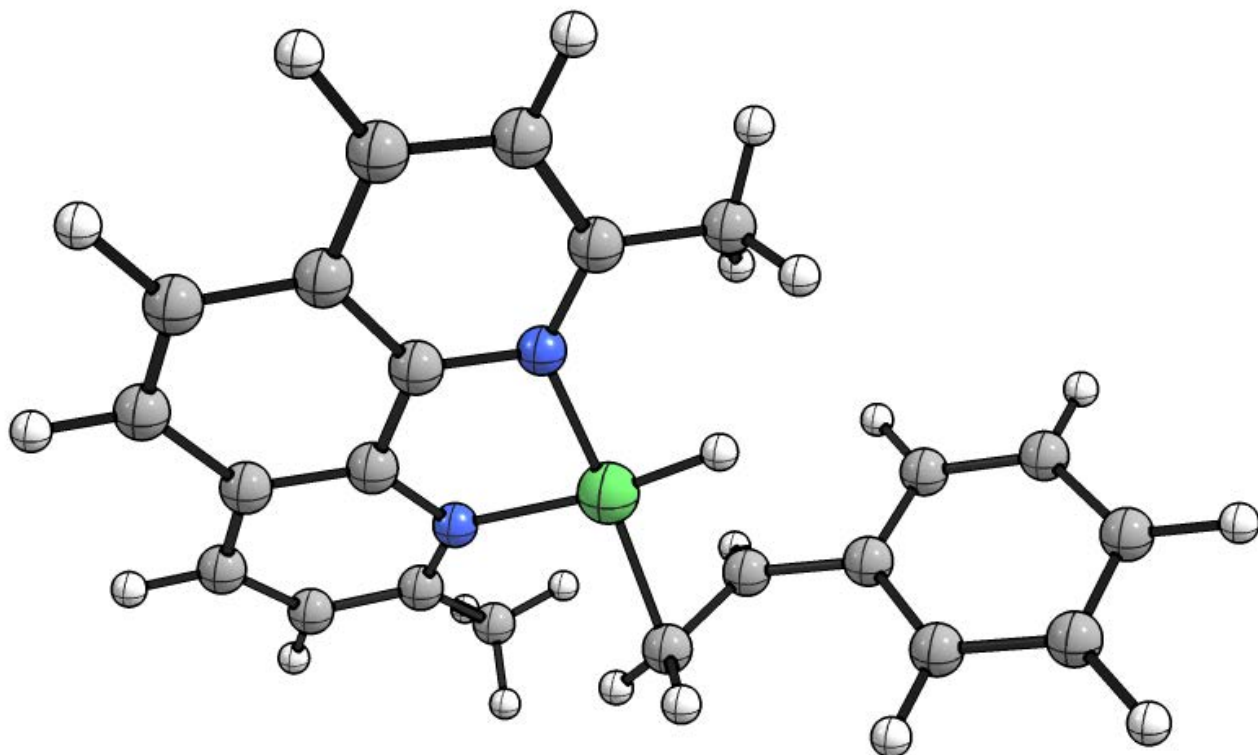

**TS<sub>L-M</sub>**

|    |               |               |               |
|----|---------------|---------------|---------------|
| C  | 0.849089041   | 3.60701425    | -0.6978876394 |
| C  | 1.8344191254  | 3.285859629   | 0.2004627477  |
| C  | 2.1023613532  | 1.9287019355  | 0.4741454269  |
| C  | 1.2996691093  | 0.9878778663  | -0.179123916  |
| C  | 0.0795408532  | 2.6005176435  | -1.3238162591 |
| C  | 3.147250904   | 1.4746134011  | 1.3463512282  |
| C  | 1.5626897033  | -0.4077669037 | -0.0083693454 |
| C  | 2.6337486387  | -0.8293340462 | 0.7860996121  |
| C  | 3.4052273438  | 0.1499566721  | 1.4951969975  |
| C  | 2.8992979589  | -2.2160886052 | 0.8024679204  |
| H  | 3.710619141   | -2.605384354  | 1.4103770878  |
| C  | 2.1550524646  | -3.0519447869 | 0.0088704334  |
| C  | 1.0889487657  | -2.5446063937 | -0.7675786267 |
| H  | 3.7436905258  | 2.2148505898  | 1.8702196252  |
| H  | 0.6453672354  | 4.6430672029  | -0.942963067  |
| H  | 2.4194594182  | 4.0632543978  | 0.6828080363  |
| H  | 4.2124583777  | -0.1873096878 | 2.1375487113  |
| H  | 2.3734464174  | -4.113398177  | -0.0385871383 |
| N  | 0.7704440261  | -1.2533579066 | -0.7241920965 |
| N  | 0.2948938977  | 1.3126071587  | -1.0454599879 |
| C  | 0.3269850918  | -3.4582806081 | -1.6818786303 |
| H  | -0.2687580296 | -4.1875145304 | -1.1221320979 |
| H  | -0.3278640472 | -2.8903204041 | -2.3442581562 |
| H  | 1.0283149427  | -4.0256242731 | -2.3012740758 |
| C  | -0.9878050568 | 2.9811619165  | -2.3043690058 |
| H  | -0.996687582  | 2.2971918335  | -3.1555670667 |
| H  | -1.9733996822 | 2.9346596808  | -1.828587238  |
| H  | -0.8323459324 | 3.9994749337  | -2.6671901511 |
| Ni | -0.8126338432 | -0.2321377523 | -1.2873311945 |
| C  | -2.0375321974 | -1.5214926385 | -0.4207500162 |
| H  | -1.8248403142 | 0.6141969621  | -1.847258298  |
| H  | -1.5493367473 | -2.4851431    | -0.3210985954 |
| C  | -2.2354534853 | -0.7960679295 | 0.846846732   |
| C  | -1.4776272929 | -1.1837849258 | 1.961030911   |
| C  | -3.0901419303 | 0.3087412466  | 0.9635748315  |
| C  | -1.5692602163 | -0.4892446968 | 3.1597268282  |
| H  | -0.8120753231 | -2.0408263573 | 1.8812349939  |
| C  | -3.183296344  | 1.0012429246  | 2.164217274   |
| H  | -3.6971008647 | 0.6226853296  | 0.1197287316  |
| C  | -2.4224179474 | 0.6072211735  | 3.2628553009  |
| H  | -0.9816831009 | -0.805733547  | 4.0156005613  |
| H  | -3.8593585775 | 1.8463405778  | 2.2459944201  |
| H  | -2.5021038487 | 1.1473974362  | 4.2007738486  |
| C  | -2.593016329  | -1.1909808257 | -1.6469916703 |
| H  | -3.4459303159 | -0.5286947704 | -1.7336803746 |
| H  | -2.4918668309 | -1.8879553433 | -2.4753385946 |



Energy = -2468.186101  
Zero-point correction = 0.378508 (Hartree/Particle)  
Thermal correction to Gibbs Free Energy = 0.328067  
Sum of electronic and zero-point Energies = -2467.807593  
Sum of electronic and thermal Energies = -2467.786731  
Sum of electronic and thermal Enthalpies = -2467.785787  
Sum of electronic and thermal Free Energies = -2467.858034  
G + ZVPE = -2467.479526  
Energy (DMF-6-31G(d)) = -2656.933771  
Energy (DMF-def2-TZVP) = -2468.8138551

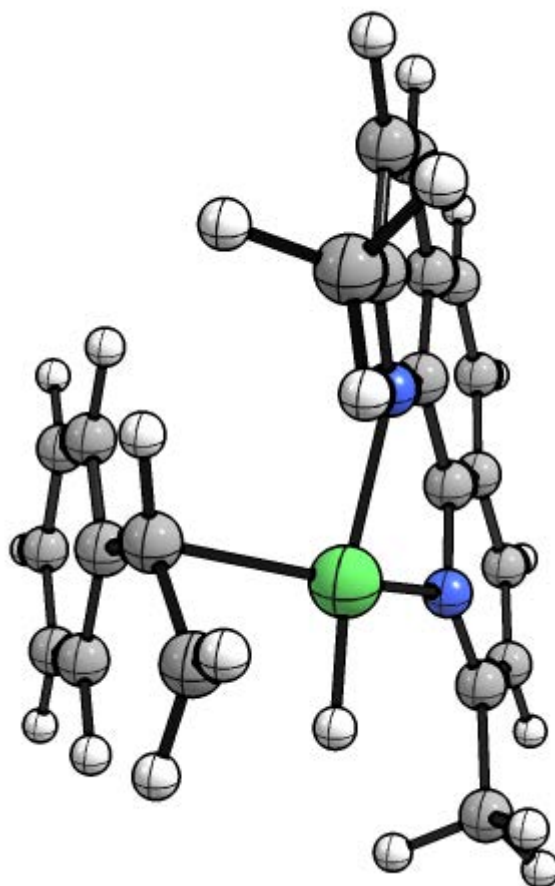

**TS<sub>0-P</sub>**

|    |               |               |               |
|----|---------------|---------------|---------------|
| C  | 1.6609430305  | -3.2150720542 | -1.1379925443 |
| C  | 2.8779196336  | -2.7053316833 | -0.7645328203 |
| C  | 2.9785493686  | -1.3452880001 | -0.4135347522 |
| C  | 1.7955110113  | -0.5888772879 | -0.4437281405 |
| C  | 0.5181994676  | -2.3865838661 | -1.1629928018 |
| C  | 4.2160264397  | -0.7175402332 | -0.0540255216 |
| C  | 1.8347750924  | 0.8123048802  | -0.1102501931 |
| C  | 3.0694486302  | 1.4041525827  | 0.2058080016  |
| C  | 4.2603304044  | 0.6055446607  | 0.2354965925  |
| C  | 3.0670778634  | 2.7857832298  | 0.4769537243  |
| H  | 3.9980200403  | 3.2912981631  | 0.7184712622  |
| C  | 1.8834979514  | 3.4733781873  | 0.4209009963  |
| C  | 0.6764789764  | 2.8019054549  | 0.1209050253  |
| H  | 5.1182922497  | -1.3219352564 | -0.032276682  |
| H  | 1.5585187127  | -4.2555777105 | -1.4263741254 |
| H  | 3.7648732566  | -3.3329386097 | -0.7496376461 |
| H  | 5.1993247535  | 1.086907253   | 0.4929588811  |
| H  | 1.8508777326  | 4.5401568728  | 0.6147090416  |
| N  | 0.6574968713  | 1.4939988874  | -0.1336014005 |
| N  | 0.5951525041  | -1.104265419  | -0.809410646  |
| C  | -0.6120856667 | 3.5664180024  | 0.1284344667  |
| H  | -1.3083655388 | 3.1997574012  | -0.6323391571 |
| H  | -1.0960847998 | 3.4662428148  | 1.1080636414  |
| H  | -0.4250785498 | 4.6311496612  | -0.0349114659 |
| C  | -0.8079215996 | -2.9263881754 | -1.596677713  |
| H  | -1.4526233893 | -3.0625002    | -0.7221993263 |
| H  | -1.315058932  | -2.2184082164 | -2.2550018788 |
| H  | -0.6911754128 | -3.8908305664 | -2.0969714611 |
| Ni | -0.9194338321 | 0.171797067   | -0.4702601242 |
| C  | -4.190806018  | 0.5346456677  | 0.1947612512  |
| H  | -4.6341842861 | 1.3681857519  | -0.3553414282 |
| H  | -4.7127791668 | 0.4300974955  | 1.1547058021  |
| C  | -2.7041070296 | 0.79062576    | 0.424168656   |
| H  | -2.5561991476 | 1.7951172453  | 0.8204049693  |
| H  | -4.3655823066 | -0.3717106499 | -0.3910731085 |
| C  | -2.0261910514 | -0.2297691112 | 1.2754318407  |
| C  | -0.9569411718 | 0.1429524296  | 2.1249265913  |
| C  | -2.3819089241 | -1.5977082221 | 1.2611819927  |
| C  | -0.2420538172 | -0.8001926436 | 2.8535391537  |
| H  | -0.713297248  | 1.1968002668  | 2.2287300719  |
| C  | -1.6649232051 | -2.5351046412 | 1.993962503   |
| H  | -3.2192924806 | -1.9205406576 | 0.6513312954  |
| C  | -0.5790461702 | -2.1494841815 | 2.7791269532  |
| H  | 0.5775787089  | -0.4765114798 | 3.4891504992  |
| H  | -1.957419774  | -3.5811210906 | 1.9510342614  |
| H  | -0.0213148427 | -2.8878755736 | 3.3470599998  |
| O  | -2.5371699775 | 2.0685579471  | -1.9312709109 |
| C  | -2.3168117029 | 0.9381866976  | -1.5467372754 |
| O  | -2.3077296462 | -0.2155029154 | -2.0315892939 |

Energy = -2656.9127352  
Zero-point correction = 0.392789 (Hartree/Particle)  
Thermal correction to Gibbs Free Energy = 0.337531  
Sum of electronic and zero-point Energies = -2656.519947  
Sum of electronic and thermal Energies = -2656.495609  
Sum of electronic and thermal Enthalpies = -2656.494665  
Sum of electronic and thermal Free Energies = -2656.575204  
G + ZVPE = -2656.182415  
Energy (DMF-6-31G(d)) = -2656.9471299  
Energy (DMF-def2-TZVP) = -2657.5681862

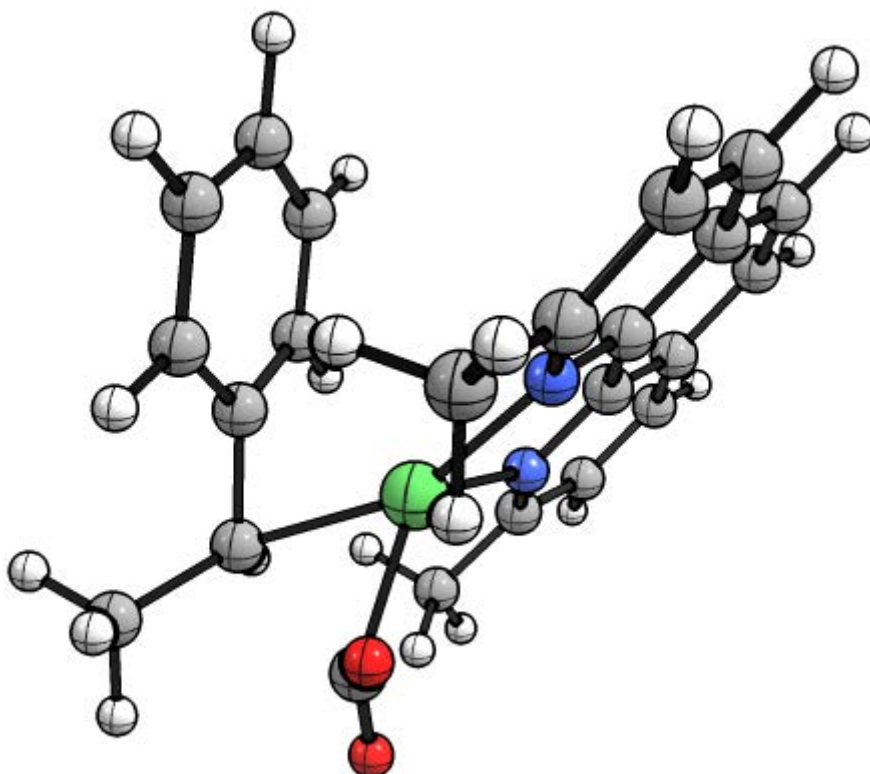

**TS<sub>0'-P'</sub>**

|    |               |               |               |
|----|---------------|---------------|---------------|
| C  | -2.5622290531 | -3.4288628851 | -0.0495365983 |
| C  | -3.6883179254 | -2.8237446036 | -0.5526713325 |
| C  | -3.7139140629 | -1.4234030758 | -0.7126789414 |
| C  | -2.5591857391 | -0.7248276119 | -0.331107378  |
| C  | -1.4395335825 | -2.652781476  | 0.3094764658  |
| C  | -4.8371107543 | -0.6947500101 | -1.2289279063 |
| C  | -2.5028613817 | 0.7074178246  | -0.4672062198 |
| C  | -3.6175004256 | 1.392647307   | -0.9720220819 |
| C  | -4.7892547034 | 0.6554888078  | -1.3519850287 |
| C  | -3.5087593459 | 2.7943016494  | -1.0697850682 |
| H  | -4.343006448  | 3.3767458517  | -1.4508565936 |
| C  | -2.3446087149 | 3.4049723121  | -0.6782325585 |
| C  | -1.2612948662 | 2.6412748351  | -0.1862253725 |
| H  | -5.7274728394 | -1.2458975081 | -1.5170179425 |
| H  | -2.52037103   | -4.5048330136 | 0.0801483656  |
| H  | -4.5584090467 | -3.4132574333 | -0.8285875147 |
| H  | -5.6418007956 | 1.204560423   | -1.7409451416 |
| H  | -2.2349385059 | 4.4818408565  | -0.7444677647 |
| N  | -1.3500278456 | 1.3156687611  | -0.0811869309 |
| N  | -1.4565513765 | -1.3298481385 | 0.1719425362  |
| C  | 0.0213540009  | 3.3005356922  | 0.2137542689  |
| H  | 0.3444885556  | 2.9650564029  | 1.2068307044  |
| H  | 0.8121748984  | 3.0270099145  | -0.4932763017 |
| H  | -0.0819393336 | 4.3882781508  | 0.2108172402  |
| C  | -0.1796023684 | -3.2702351957 | 0.8347970971  |
| H  | -0.3390374673 | -4.3069120379 | 1.1404694958  |
| H  | 0.5894660769  | -3.2593770826 | 0.0527122811  |
| H  | 0.2024249823  | -2.6855614058 | 1.6768155951  |
| Ni | -0.0714158854 | -0.0112401389 | 0.7540997212  |
| C  | 2.9626040952  | -0.4900366661 | 0.8023024573  |
| H  | 3.3644663951  | -0.3502458269 | 1.8118853576  |
| C  | 1.8653894809  | 0.5468095202  | 0.5401586623  |
| H  | 2.2465692389  | 1.5567540126  | 0.6946696969  |
| H  | 2.5302724383  | -1.497684432  | 0.7848295127  |
| O  | 0.9971336202  | 1.6046415548  | 2.8585281306  |
| C  | 0.8510266128  | 0.5408718714  | 2.293404454   |
| O  | 0.6050197751  | -0.6481579731 | 2.6205931927  |
| H  | 1.5841824156  | 0.4907024451  | -0.5308289135 |
| C  | 4.0765109695  | -0.3916909398 | -0.2119987786 |
| C  | 5.0780372632  | 0.5739744565  | -0.0766226515 |
| C  | 4.1052333907  | -1.2201931697 | -1.3359048679 |
| C  | 6.0770280413  | 0.7088312463  | -1.0350265501 |
| H  | 5.0697360709  | 1.2267636456  | 0.7935294083  |
| C  | 5.102222863   | -1.0903315905 | -2.2991631615 |
| H  | 3.3350237795  | -1.9800867093 | -1.4544840981 |
| C  | 6.0926536389  | -0.1237485675 | -2.1518693525 |
| H  | 6.8481990987  | 1.46388355    | -0.9090236146 |
| H  | 5.1078420106  | -1.74887555   | -3.163609322  |
| H  | 6.8732770712  | -0.021871729  | -2.9002397726 |

Energy = -2656.894582  
Zero-point correction = 0.392162 (Hartree/Particle)  
Thermal correction to Gibbs Free Energy = 0.335488  
Sum of electronic and zero-point Energies = -2656.502420  
Sum of electronic and thermal Energies = -2656.477882  
Sum of electronic and thermal Enthalpies = -2656.476937  
Sum of electronic and thermal Free Energies = -2656.559094  
G + ZVPE = -2656.166932  
Energy (DMF-6-31G(d)) = -2656.933771  
Energy (DMF-def2-TZVP) = -2468.8138551

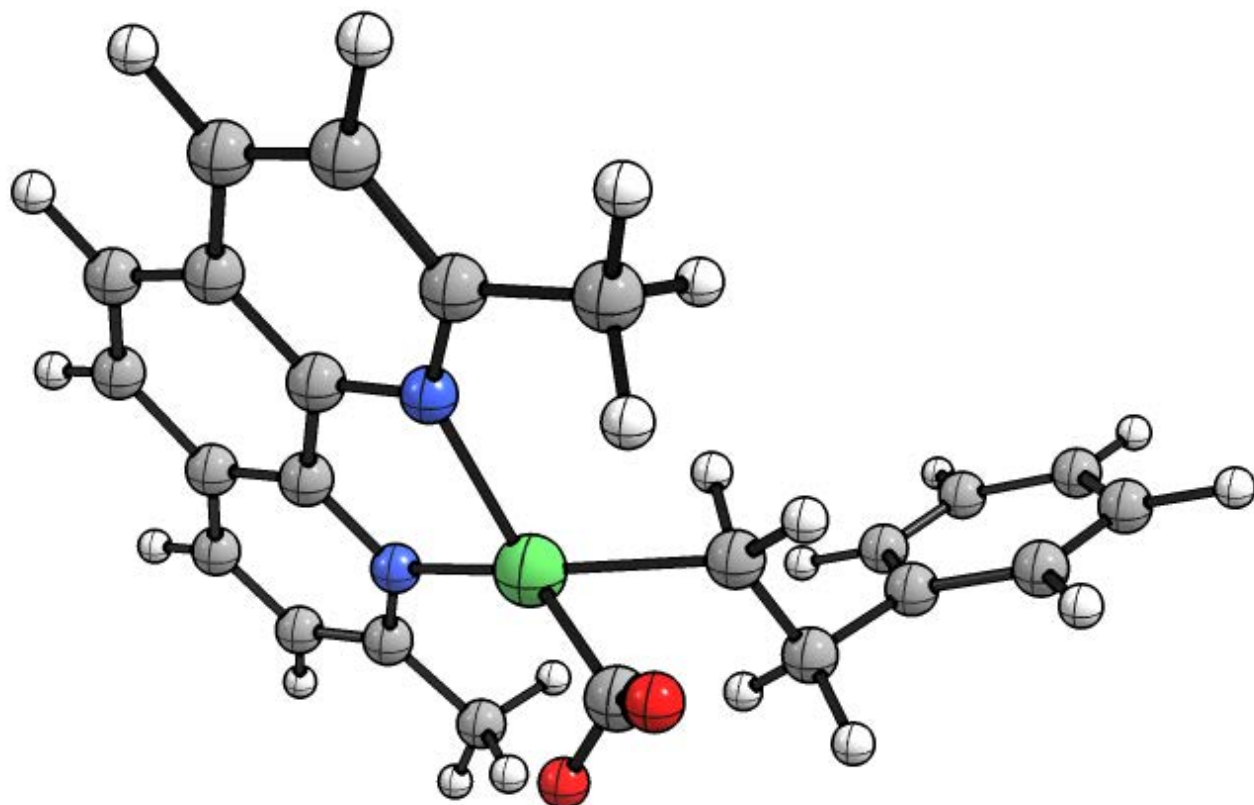

## 10 References

- [1] Y. Han, B. Zheng, Y. Peng, *Adv. Synth. Catal.* **2015**, *357*, 1136-1142.
- [2] S. D. Holmbo, S. V. Pronin, *J. Am. Chem. Soc.* **2018**, *140*, 5065-5068.
- [3] C. P. Burke, Y. Shi, *Org. Lett.* **2009**, *11*, 5150-5153.
- [4] A. K. Pitts, F. O'Hara, R. H. Snell, M. J. Gaunt, *Angew. Chem. Int. Ed.* **2015**, *54*, 5451-5455.
- [5] M. Kawasaki, M. Goto, S. Kawabata, T. Kometani, *Tetrahedron Asymmetry* **2001**, *12*, 585-596.
- [6] K. Brady, R. H. Abeles, *Biochemistry* **1990**, *29*, 7608-7617.
- [7] Z. Wang, J. Tang, C. E. Salomon, C. D. Dreis, R. Vince, *Bioorg. Med. Chem.* **2010**, *18*, 4202-4211.
- [8] Q. T. Do, G. T. Nguyen, V. Celis, R. S. Phillips, *Arch. Biochem. Biophys.* **2014**, *560*, 20-26.
- [9] T. C. Atack, R. M. Lecker, S. P. Cook, *J. Am. Chem. Soc.* **2014**, *136*, 9521-9523.
- [10] D. J. Morris, A. M. Hayes, M. Wills, *J. Org. Chem.* **2006**, *71*, 7035-7044.
- [11] J. L. Timmermans, M. P. Wamelink, G. Lodder, J. Cornelisse, *Eur. J. Org. Chem.* **1999**, 463-470.
- [12] P. L. Ornstein, Thomas J. Bleisch, M. Brian Arnold, Rebecca A. Wright, Bryan G. Johnson, D. D. and Schoepp, *J. Med. Chem.* **1998**, *41*, 346-357.
- [13] T. Moriya, S. Yoneda, K. Kawana, R. Ikeda, T. Konakahara, N. Sakai, *Org. Lett.* **2012**, *14*, 4842-4845.
- [14] K. V. Butler, J. Kalin, C. Brochier, G. Vistoli, B. Langley, A. P. Kozikowski, *J. Am. Chem. Soc.* **2010**, *132*, 10842-10846.
- [15] Q. Wu, L. Wang, R. Jin, C. Kang, Z. Bian, Z. Du, X. Ma, H. Guo, L. Gao, *Eur. J. Org. Chem.* **2016**, *2016*, 5415-5422.
- [16] H. Ito, K. Kubota, *Org. Lett.* **2012**, *14*, 890-893.
- [17] V. A. Schmidt, R. K. Quinn, A. T. Brusoe, E. J. Alexanian, *J. Am. Chem. Soc.* **2014**, *136*, 14389-14392.
- [18] F. Juliá-Hernández, T. Moragas, J. Cornella, R. Martin, *Nature* **2017**, *545*, 84-88.
- [19] S. J. Kaldas, A. Cannillo, T. McCallum, L. Barriault, *Org. Lett.* **2015**, *17*, 2864-2866.
- [20] G. Butt, R. D. Topsom, *J. Heterocycl. Chem.* **1981**, *18*, 641-641.

- [21] R. A. Altman, S. L. Buchwald, *Org. Lett.* **2006**, *8*, 2779–2782.
- [22] H. Chen, X. Jia, Y. Yu, Q. Qian, H. Gong, *Angew. Chem. Int. Ed.* **2017**, *56*, 13103–13106.
- [23] A. C. Edwards, C. Wagner, A. Geist, N. A. Burton, C. A. Sharrad, R. W. Adams, R. G. Pritchard, P. J. Panak, R. C. Whitehead, L. M. Harwood, *Dalton Trans.* **2016**, *45*, 18102–18112.
- [24] P. J. Pijper, H. Van der Goot, H. Timmerman, W. T. Nauta, *Eur. J. Med. Chem.* **1984**, *19*, 399–404.
- [25] Q. -Y. Meng, S. Wang, B. König, *Angew. Chem. Int. Ed.* **2017**, *56*, 13426–13430.
- [26] S. Rezazadeh, V. Devannah, D. A. Watson, *J. Am. Chem. Soc.* **2017**, *139*, 8110–8113.
- [27] E. Serrano, R. Martin, *Angew. Chem. Int. Ed.* **2016**, *55*, 11207–11211
- [28] M. Khrizanforov, V. Khrizanforova, V. Mamedov, N. Zhukova, S. Strekalova, V. Grinenko, T. Gryaznova, O. Sinyashin, Y. Budnikova, *J. Organomet. Chem.* **2016**, *820*, 82–88.
- [29] L. M. Schneider, V. M. Schmiedel, T. Pecchioli, D. Lentz, C. Merten, M. Christmann, *Org. Lett.* **2017**, *19*, 2310–2313
- [30] J. Luo, J. Zhang, *ACS Catal.* **2016**, *6*, 873–877.
- [31] Q. -Y. Meng, S. Wang, G. S. Huff, B. König, *J. Am. Chem. Soc.* **2018**, *140*, 3198–3201.
- [32] M. Gaydou, T. Moragas, F. Juliá-Hernández, R. Martin, *J. Am. Chem. Soc.* **2017**, *139*, 12161–12164.
- [33] N. R. Vautravers, B. Breit, *Synlett* **2011**, *17*, 2517–2520.
- [34] A. Kisic, M. Stephan, B. Mohar, *Adv. Synth. Catal.* **2015**, *357*, 2540–2546.
- [35] K. K. Ghosh, M. van Gemmeren, *Chem. Eur. J.* **2017**, *23*, 17697–17700.
- [36] R. Fumeaux, C. Menozzi-Smarrito, A. Stalmach, C. Munari, K. Kraehenbuehl, H. Steiling, A. Crozier, G. Williamson, D. Barron, *Org. Biomol. Chem.* **2010**, *8*, 5199–5211.
- [37] T. Hama, S. Ge, J. F. Hartwig, *J. Org. Chem.* **2013**, *78*, 8250–8266.
- [38] M. Katayama, Y. Kato, S. Marumo, *Biosci. Biotechnol. Biochem.* **2004**, *68*, 1287–1292.

- [39] P. Zhang, R. M. Krieger, J. W. Frost, *ACS Sustainable Chem. Eng.* **2016**, *4*, 6991-6995.
- [40] M. Juhl, S. L. R. Laursen, Y. Huang, D. U. Nielsen, K. Daasbjerg, T. Skrydstrup, *ACS Catal.* **2017**, *7*, 1392-1396.
- [41] M. D. Greenhalgh, S. P. Thomas, *J. Am. Chem. Soc.* **2012**, *134*, 11900-11903.
- [42] M. Hayashi, H. Kawabata, K. Yoshimoto, T. Tanaka, *Phosphorus, Sulfur, and Silicon* **2007**, *182*, 433-445.
- [43] O. Ries, M. Büschleb, M. Granitzka, D. Stalke, C. Ducho, *Beilstein J. Org. Chem.* **2014**, *10*, 1135-1142.
- [44] S. G. Sudrik, N. K. Chaki, V. B. Chavan, S. P. Chavan, S. P. Chavan, H. R. Sonawane, K. Vijayamohanan, *Chem. Eur. J.* **2006**, *12*, 859-864.
- [45] R. Zhu, J.-L. Jiang, X.-L. Li, J. Deng, Y. Fu, *ACS Catal.* **2017**, *7*, 7520-7528.
- [46] V. Magrioti, A. Nikolaou, A. Smyrniotou, I. Shah, V. Constantinou-Kokotou, E. A. Dennis, G. Kokotos, *Bioorg. Med. Chem.* **2013**, *21*, 5823-5829.
- [47] V. V. Pavlishchuk, A. W. Addison, *Inorganica Chim. Acta* **2000**, *298*, 97-102.
- [48] F. Hartl, H. Luyten, H. A. Nieuwenhuis, G. C. Schoemaker, *Appl. Spectrosc.* **1994**, *48*, 1522-1528.
- [49] M. J. Frisch, G. W. Trucks, H. B. Schlegel, G. E. Scuseria, M. A. Robb, J. R. Cheeseman, G. Scalmani, V. Barone, B. Mennucci, G. A. Petersson, et al., *Gaussian 09*, Gaussian, Inc., Wallingford CT, **2016**.
- [50] J.-D. Chai, M. Head-Gordon, *Phys. Chem. Chem. Phys.* **2008**, *10*, 6615.
- [51] A. V. Marenich, C. J. Cramer, D. G. Truhlar, *J. Phys. Chem. B* **2009**, *113*, 6378-6396.
- [52] A. Schäfer, C. Huber, R. Ahlrichs, *J. Chem. Phys.* **1994**, *100*, 5829-5835.
- [53] O. Gutierrez, J. C. Tellis, D. N. Primer, G. A. Molander, M. C. Kozlowski, *J. Am. Chem. Soc.* **2015**, *137*, 4896-4899.
- [54] C. Y. Legault, *CYLview*, **2009**.
- [55] G. A. Andrienko, *Chemcraft 1.8*, **2019**.



# 11 NMR Spectra

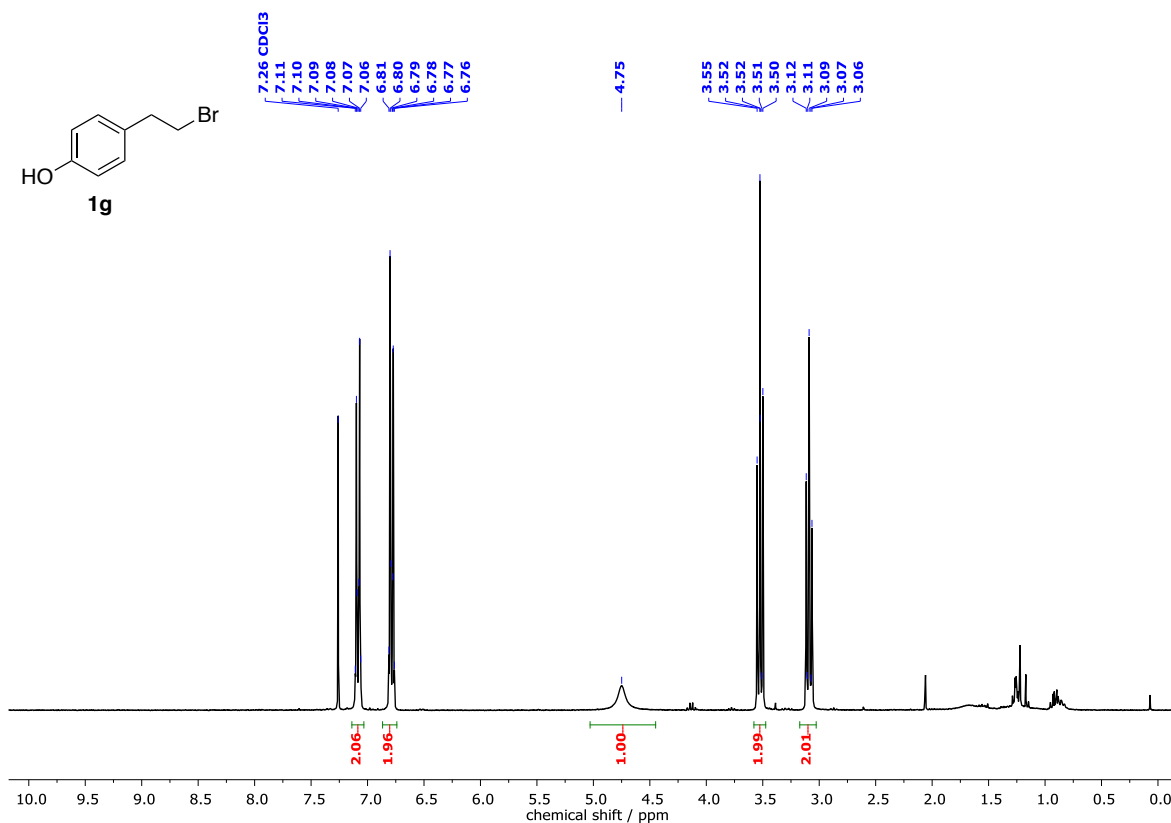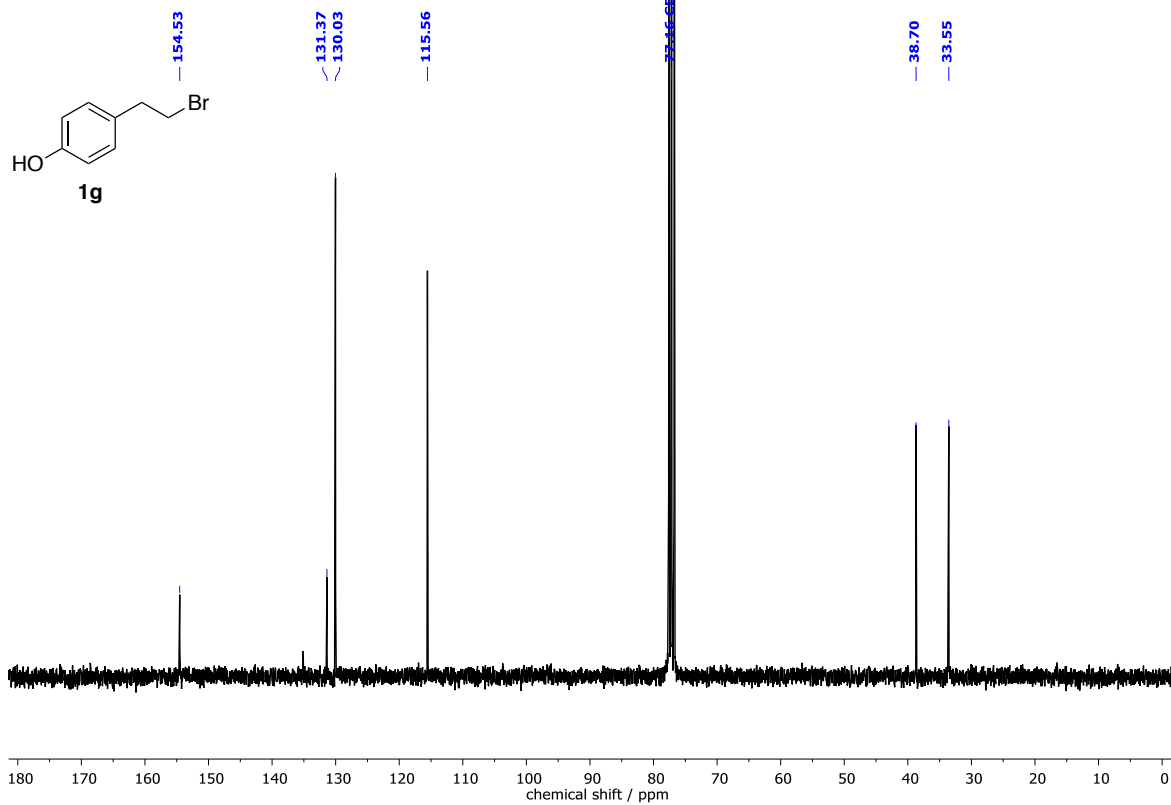

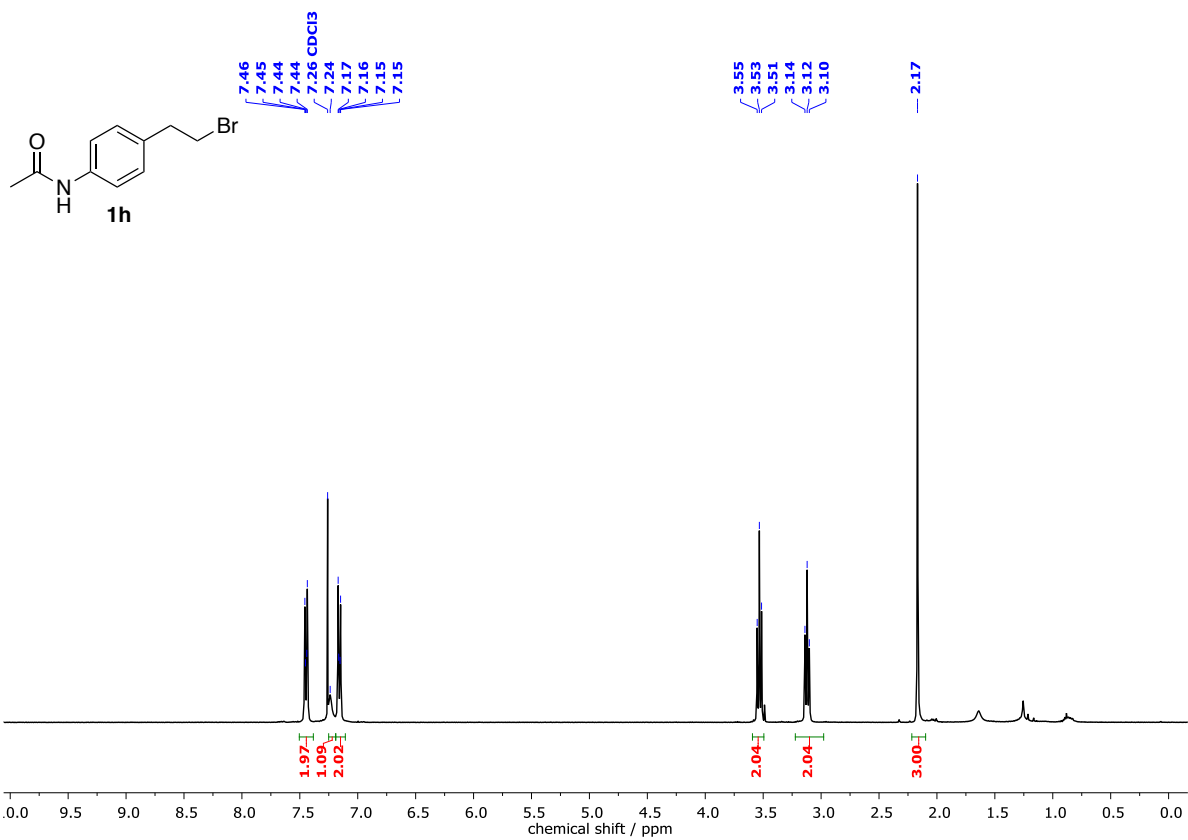

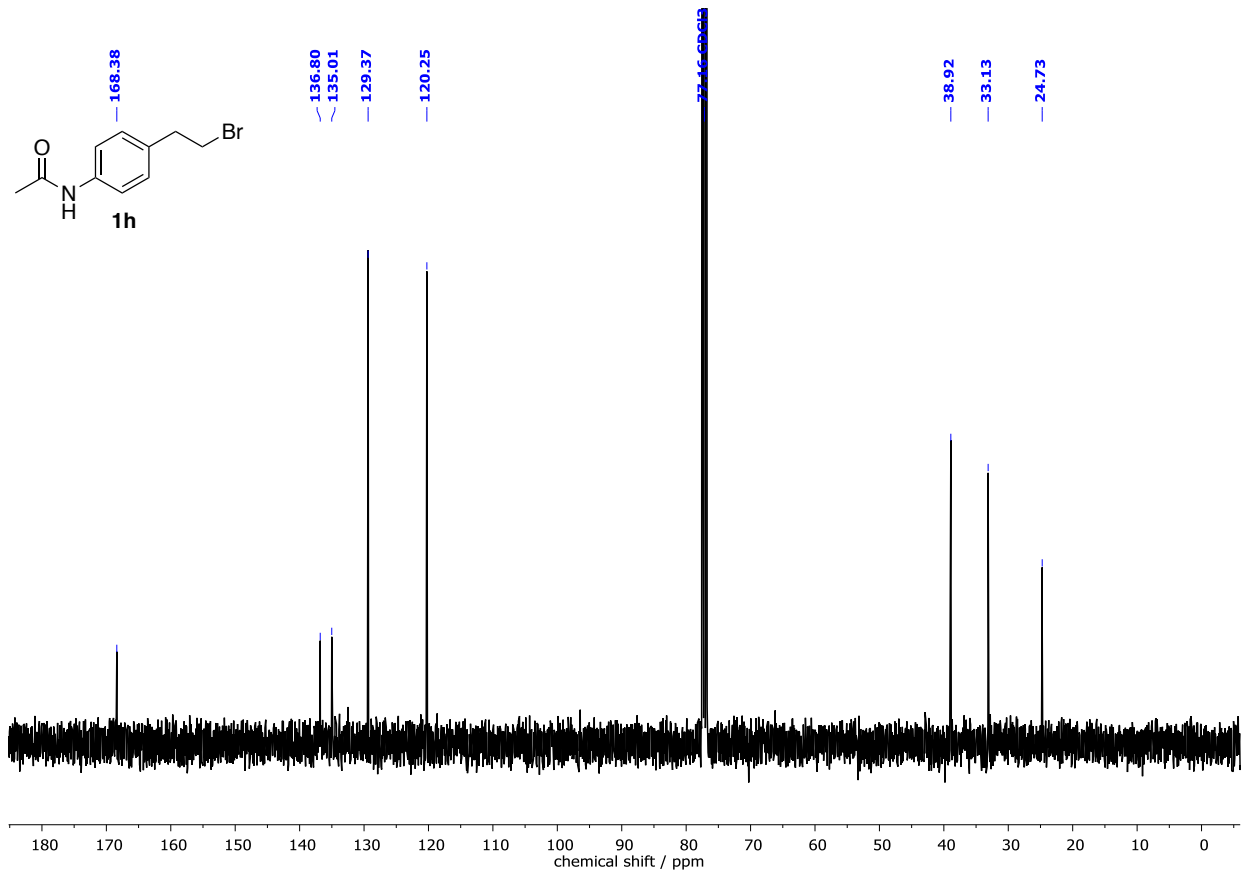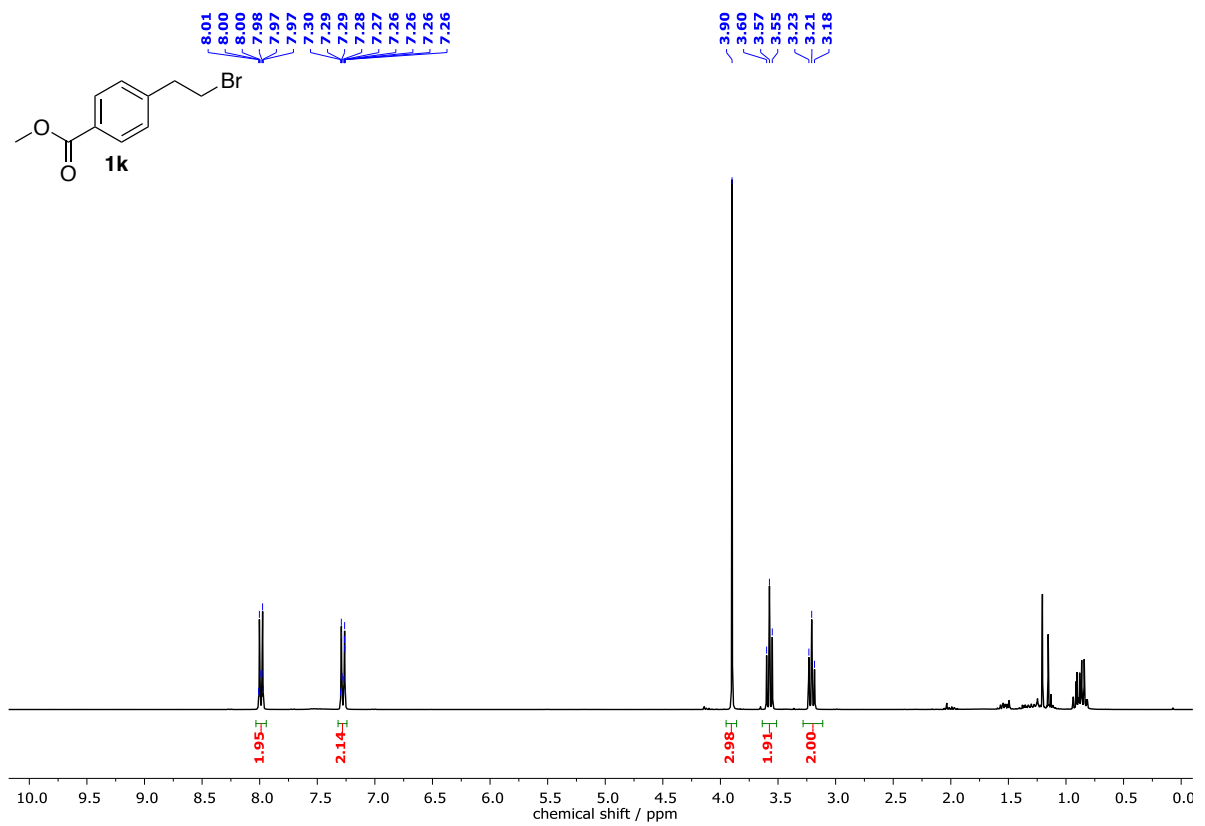

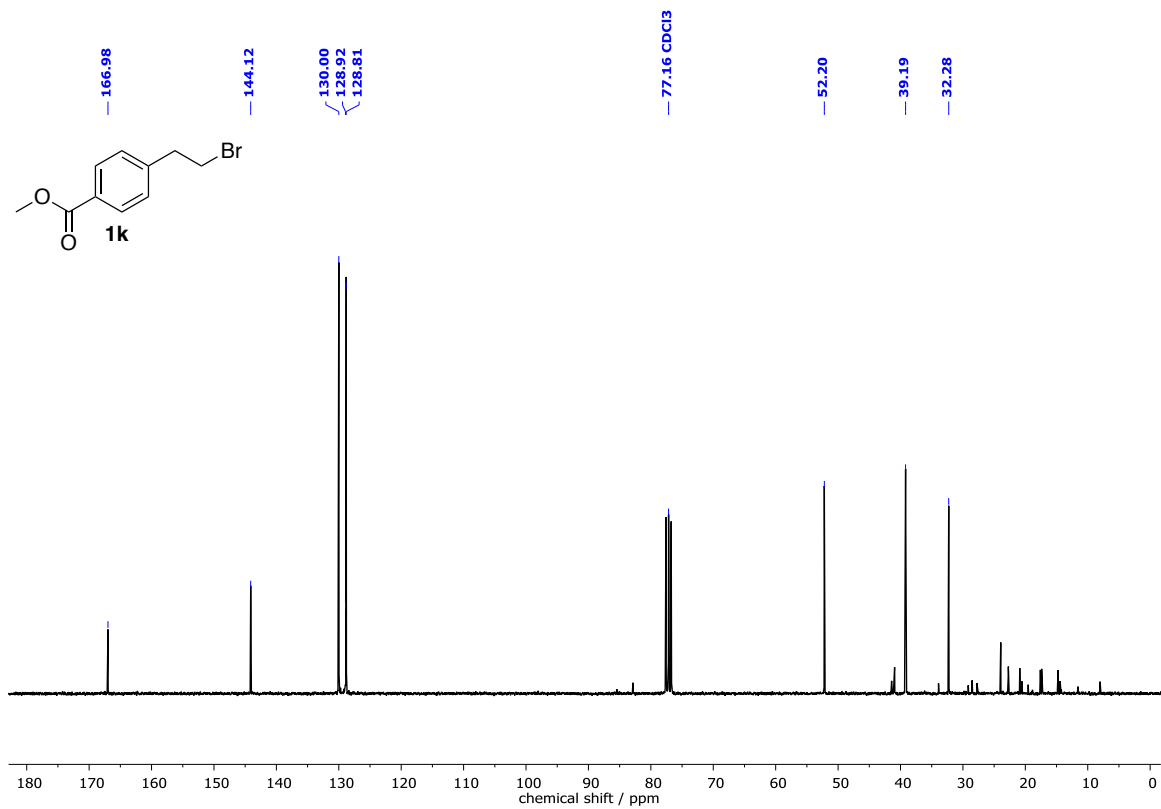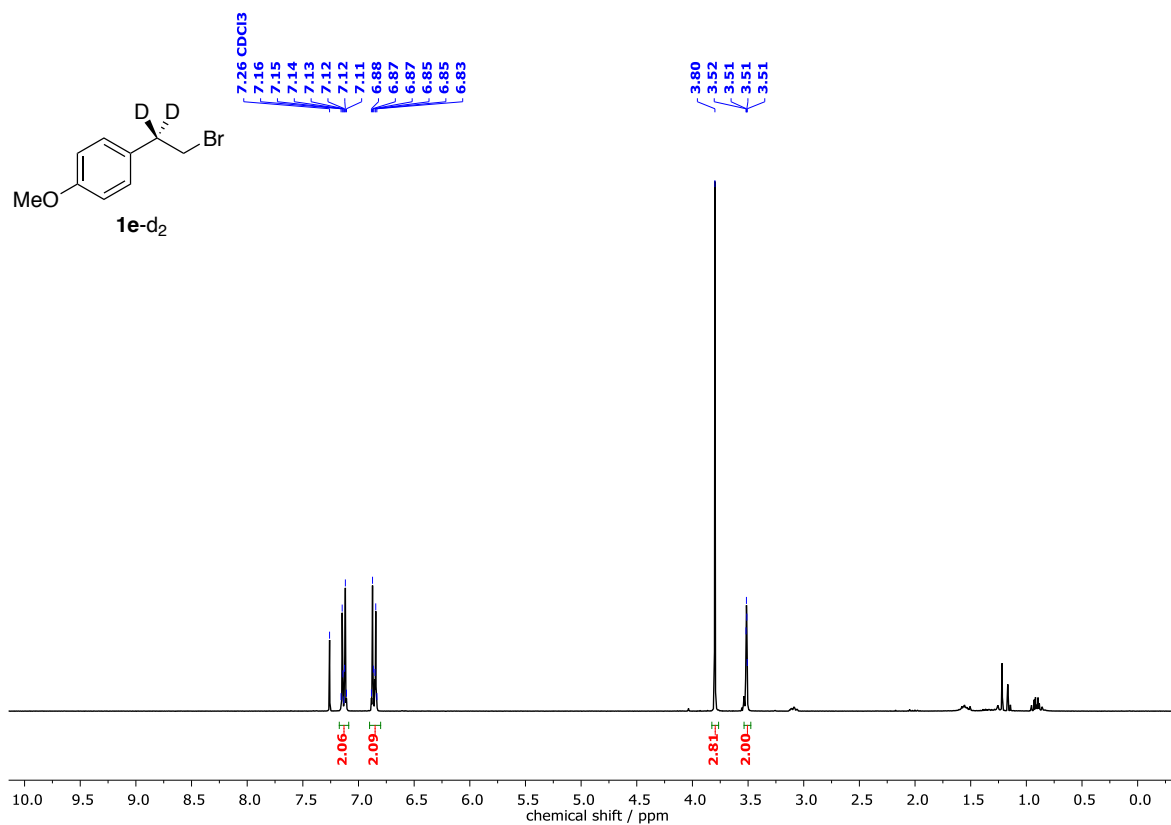

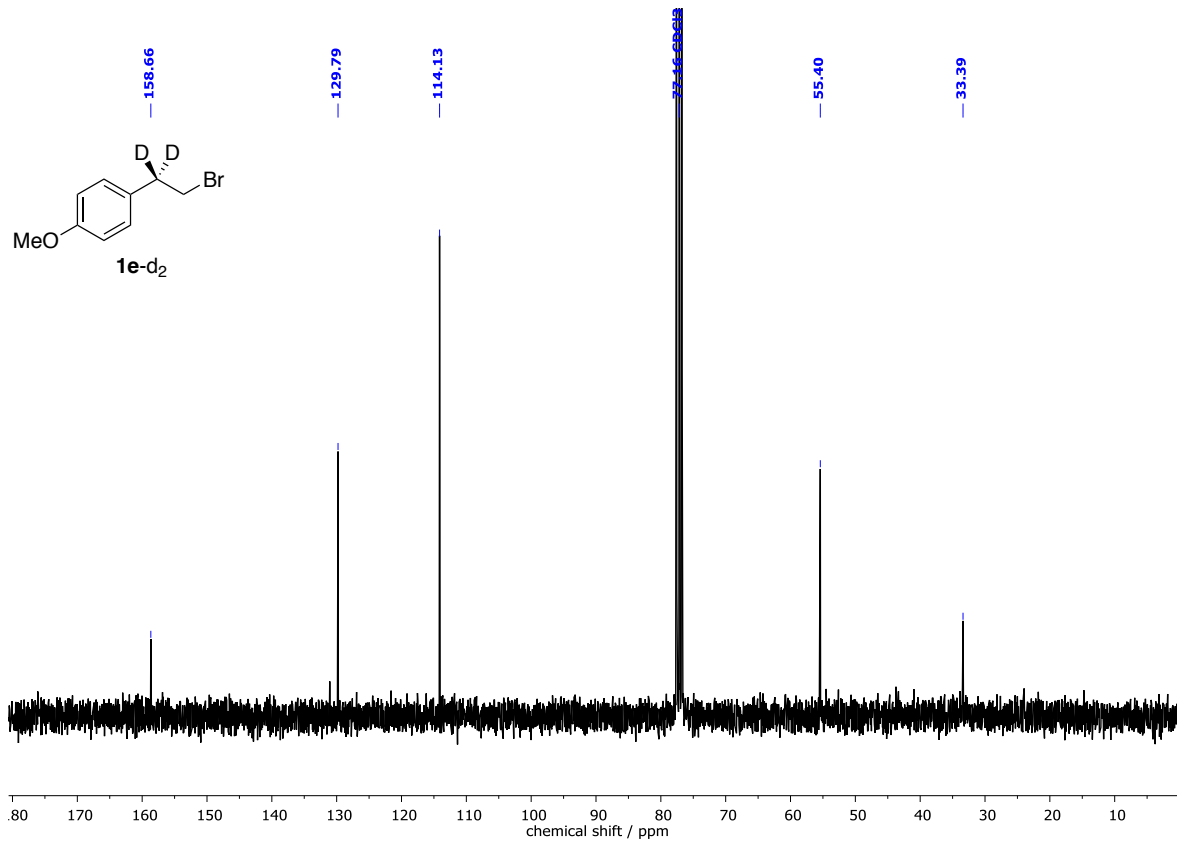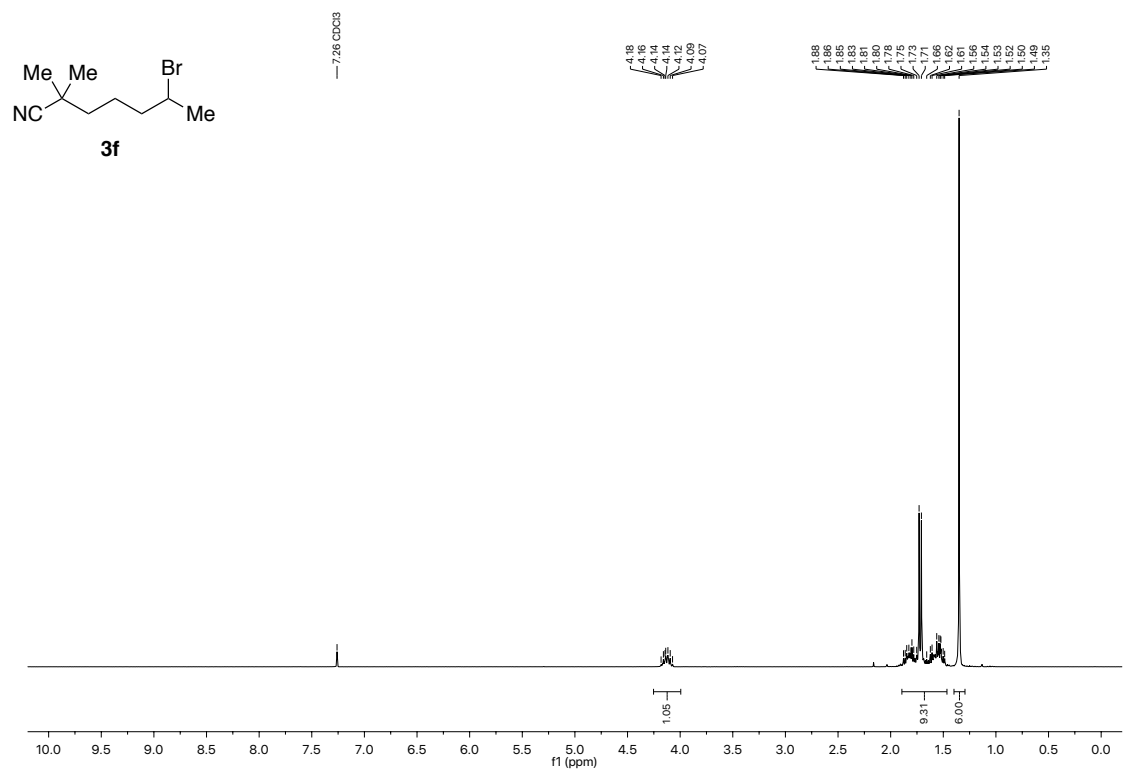

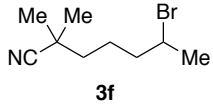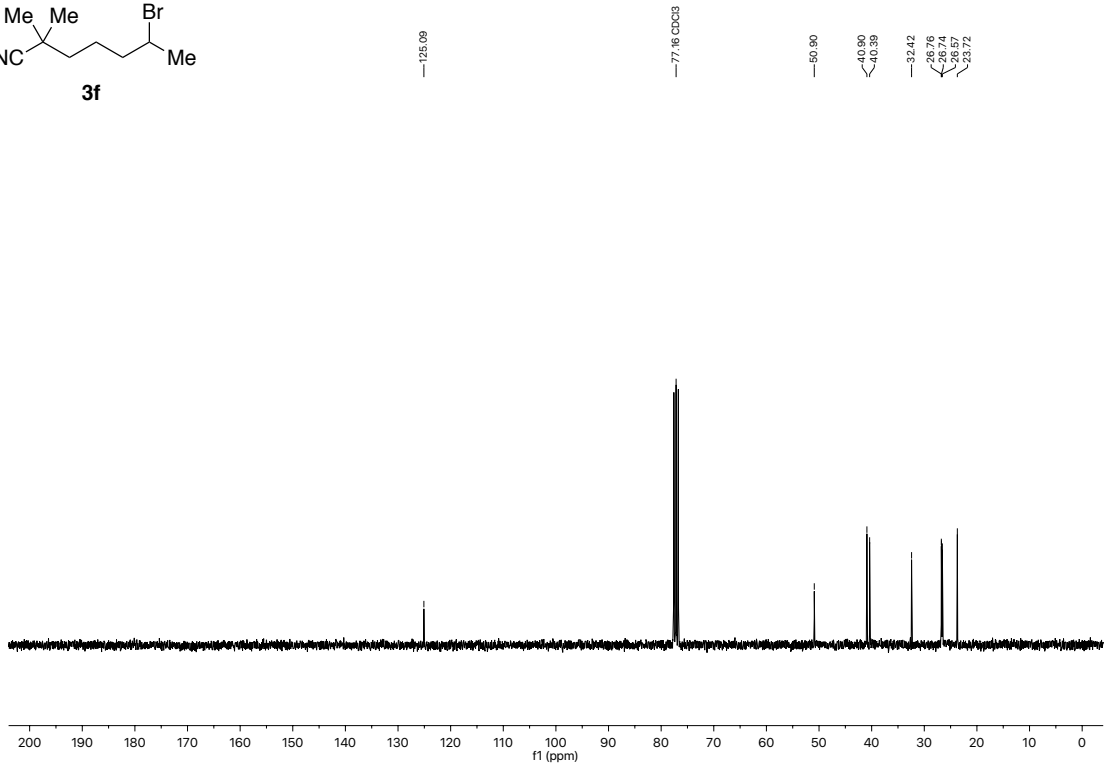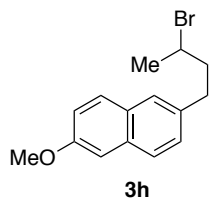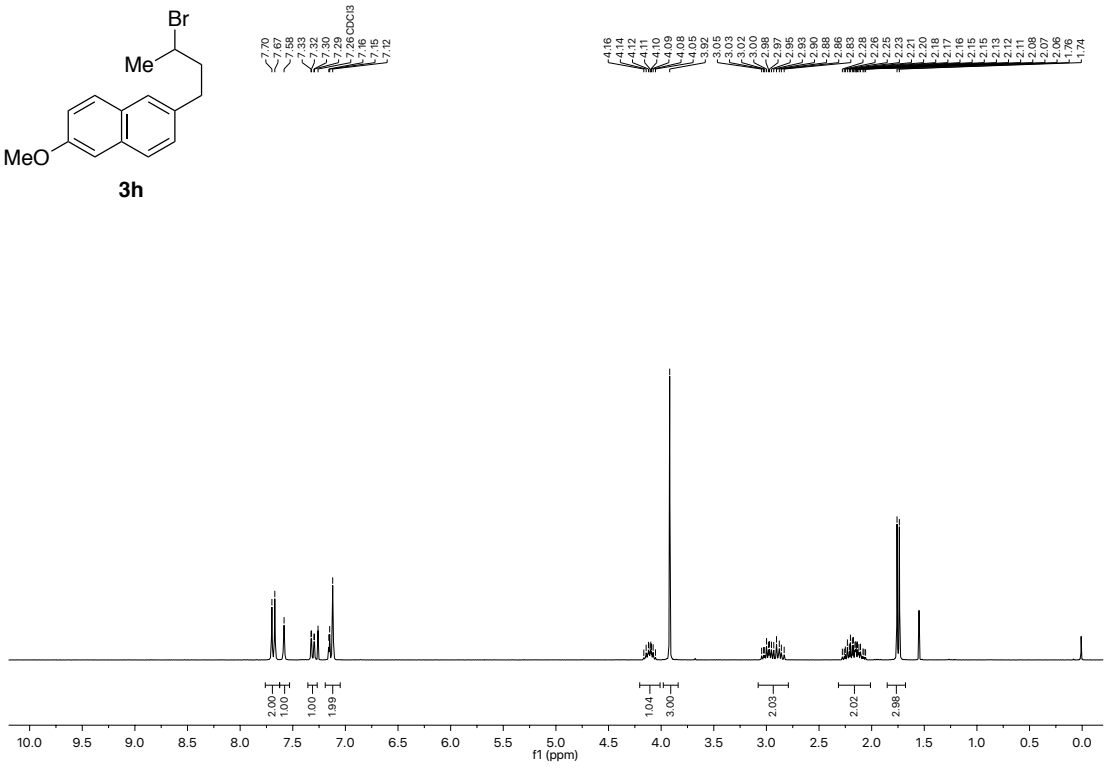

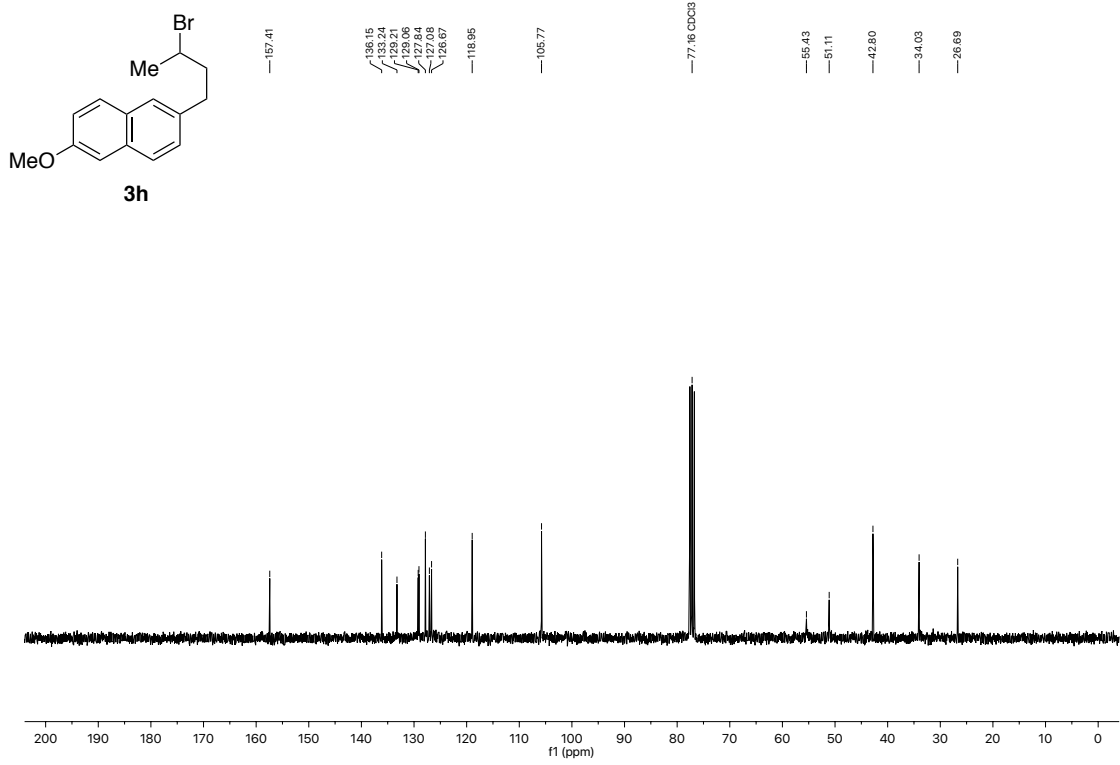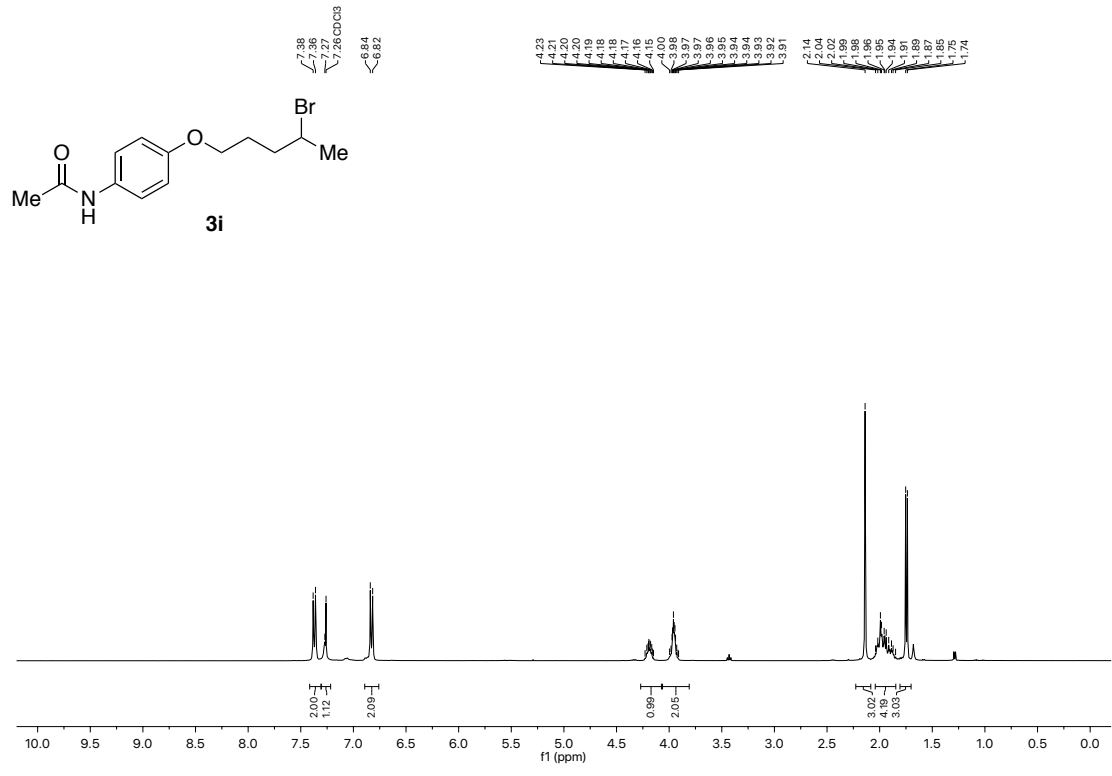

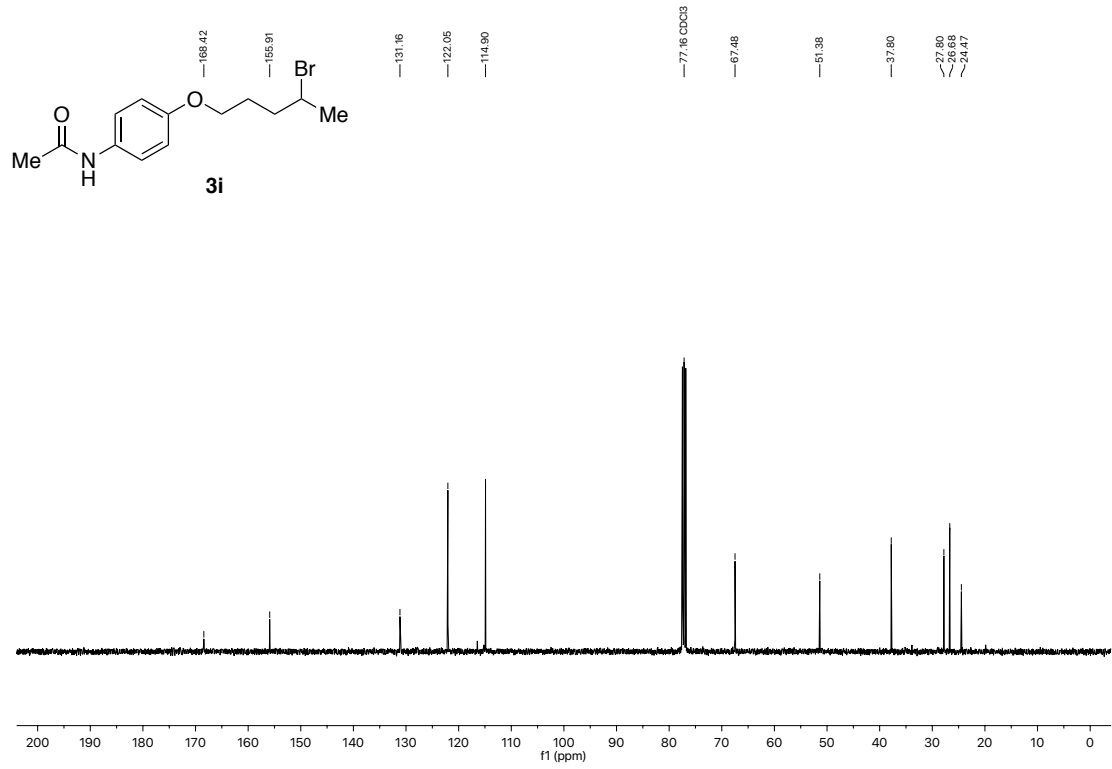



<sup>1</sup>H NMR (300 MHz, CDCl<sub>3</sub>, 294 K)

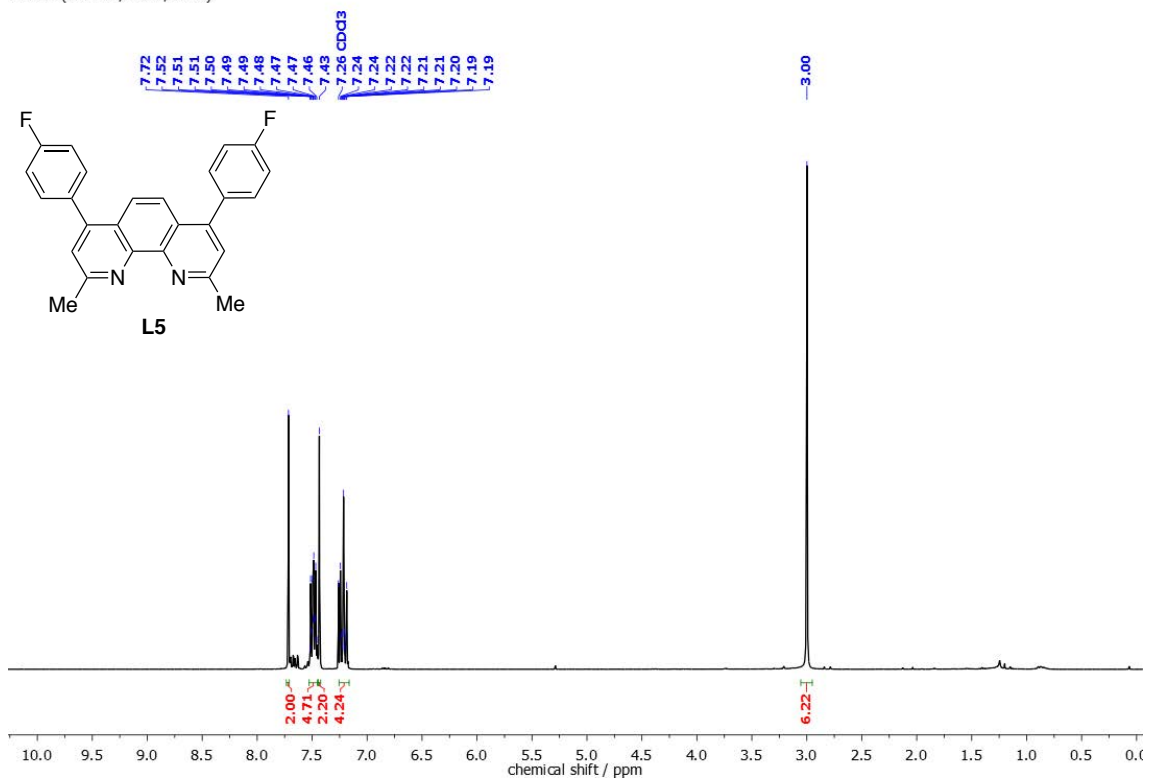

<sup>13</sup>C NMR (100 MHz, CDCl<sub>3</sub>, 298 K)

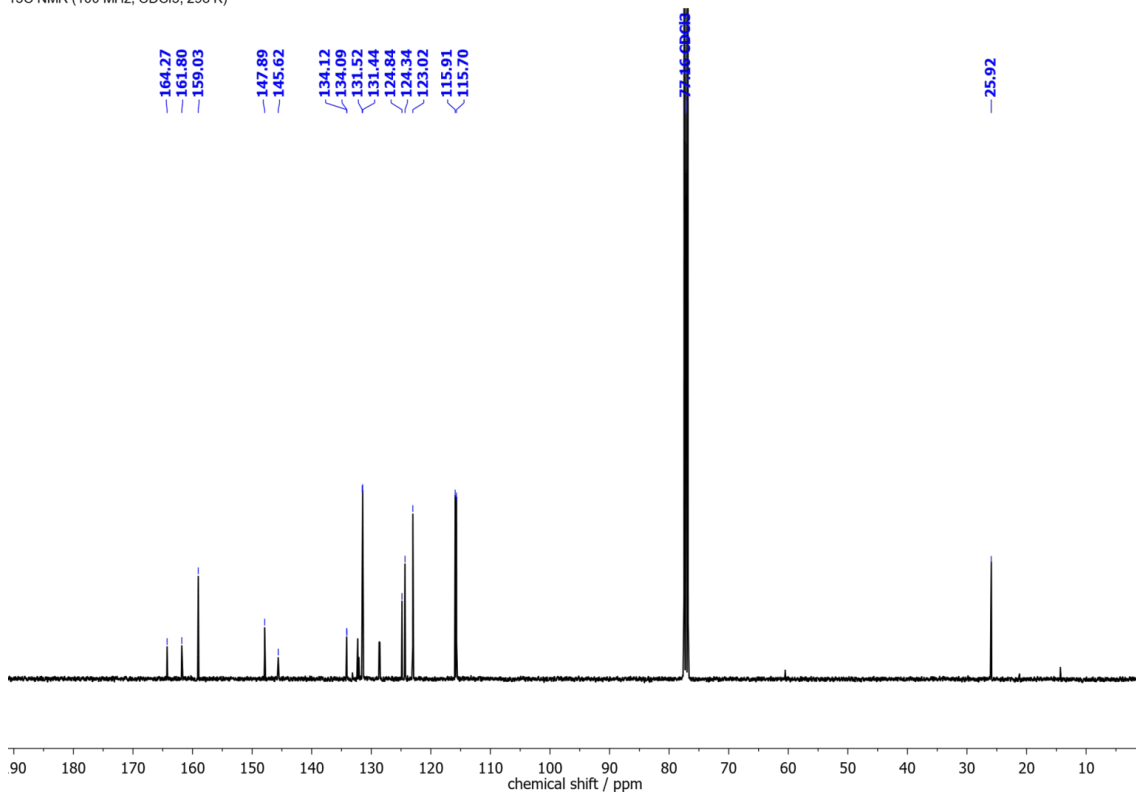

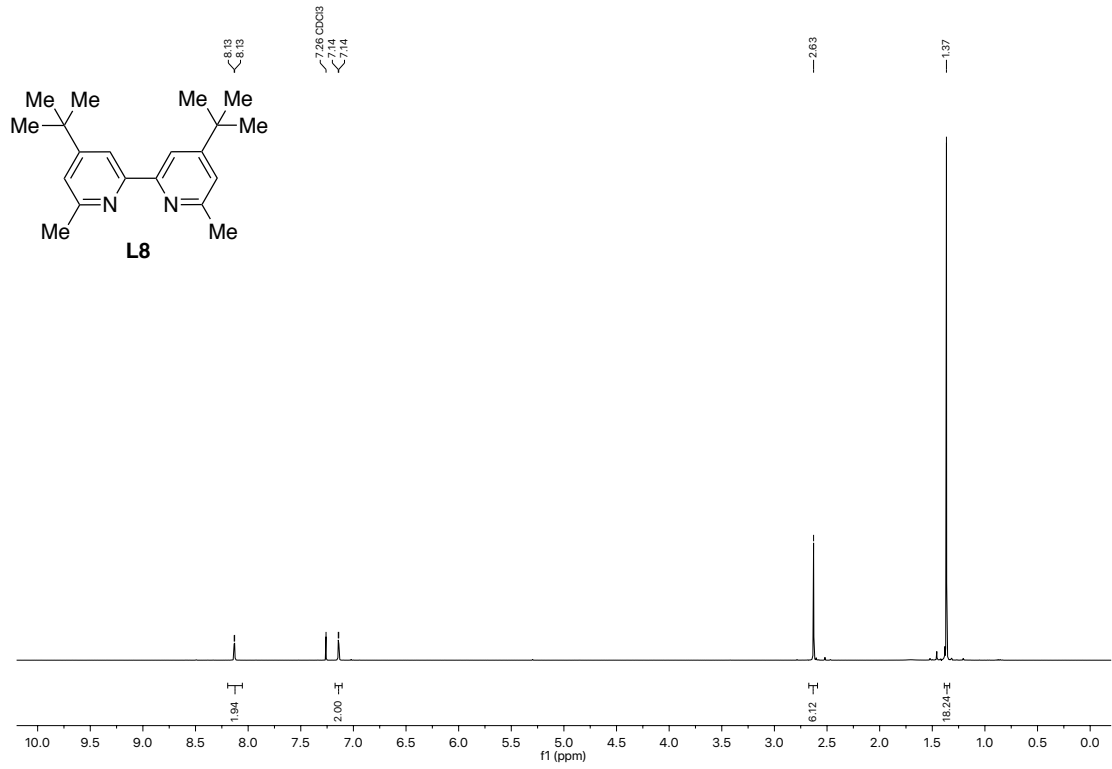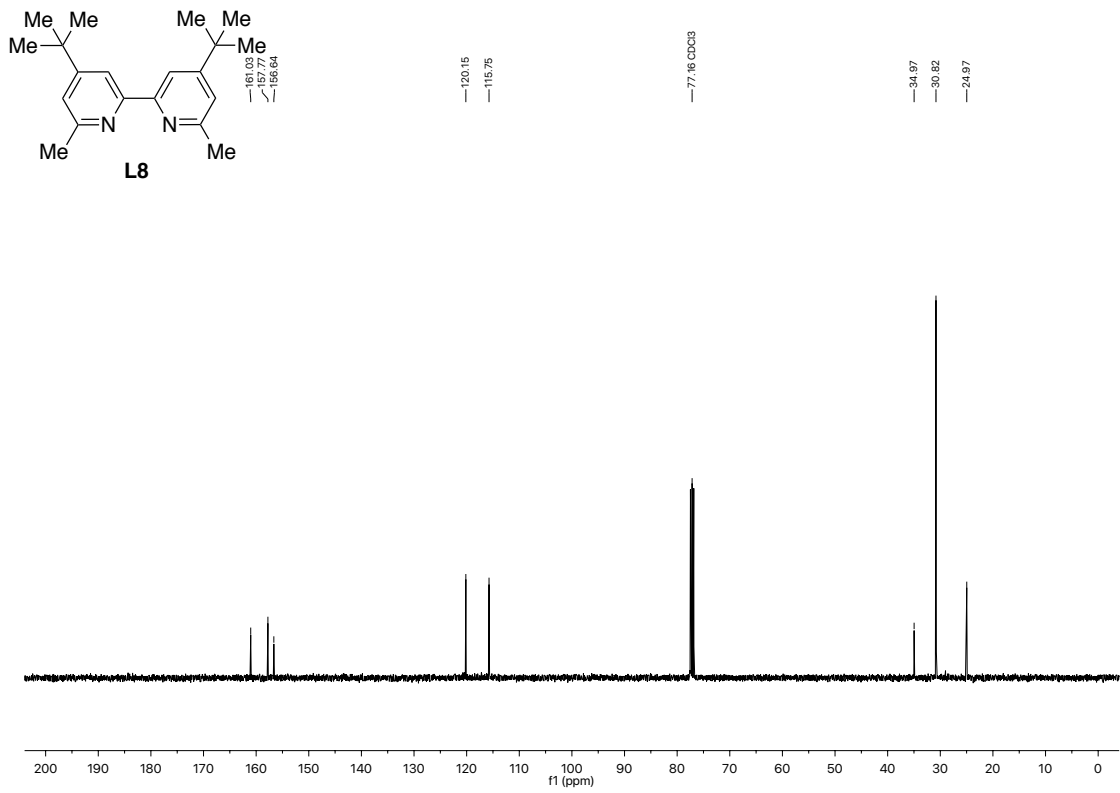

<sup>1</sup>H NMR (300 MHz, CDCl<sub>3</sub>, 295 K)

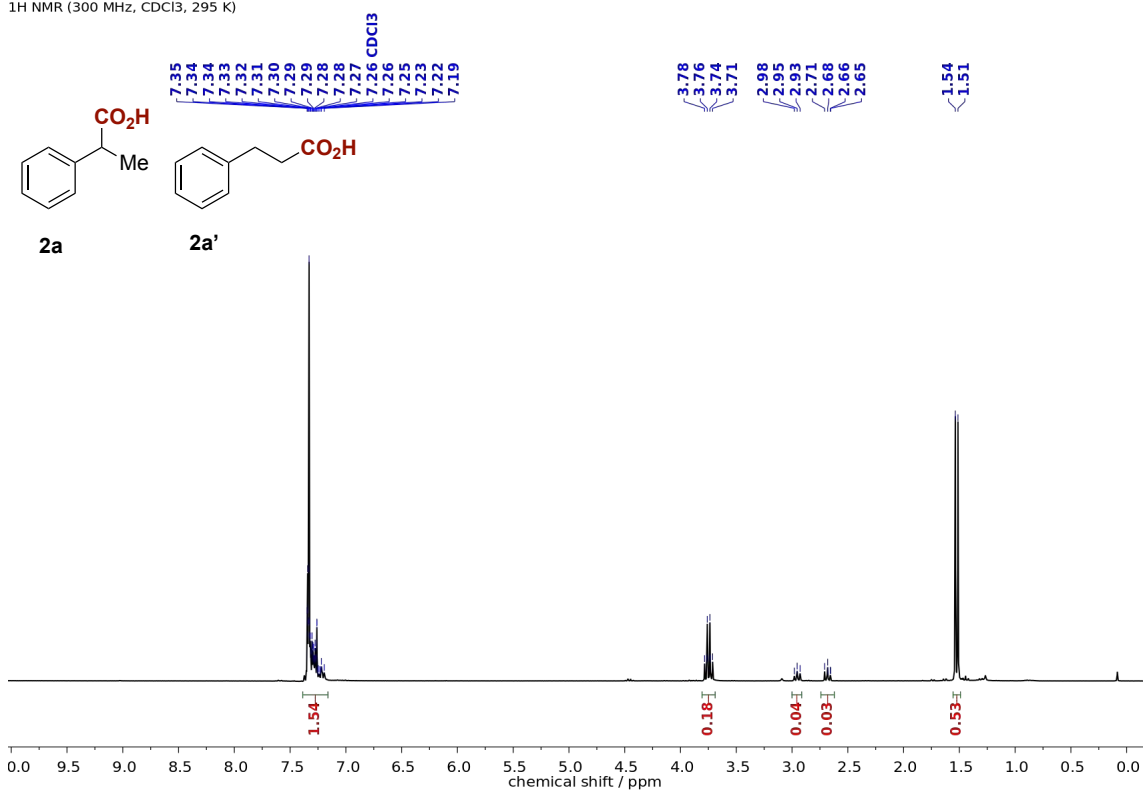

<sup>13</sup>C NMR (75. MHz, CDCl<sub>3</sub>, 294 K)

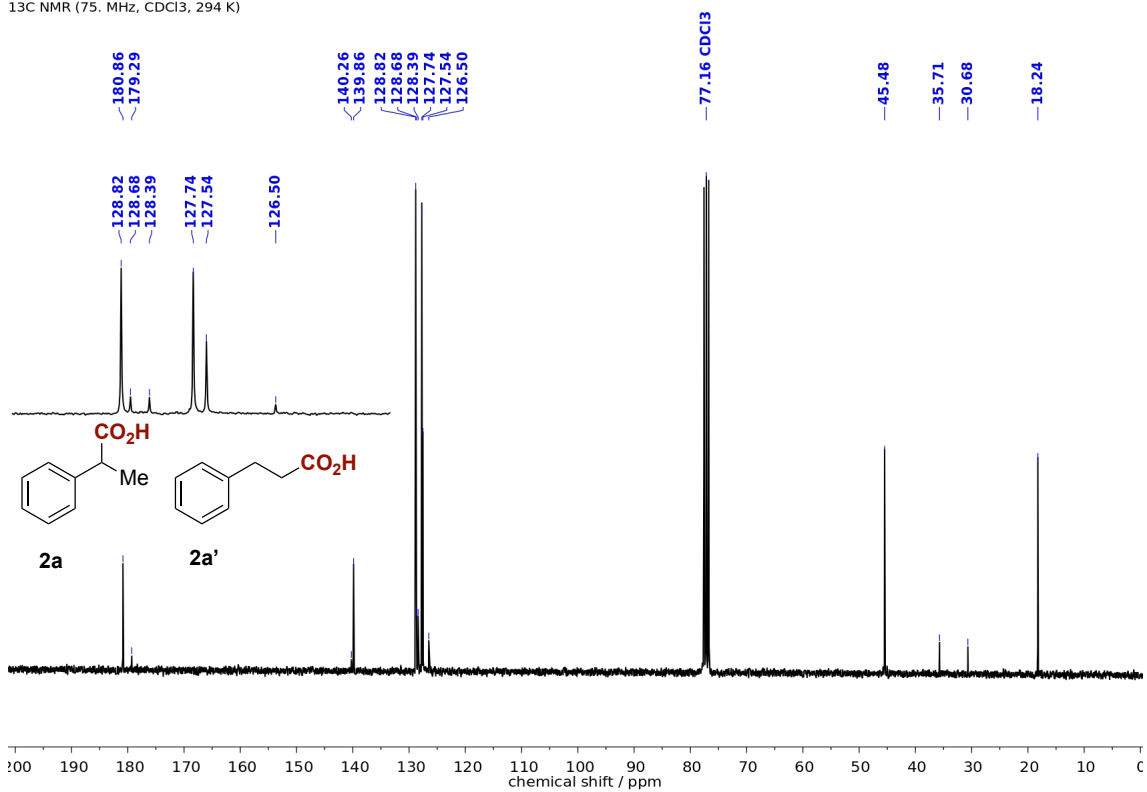

<sup>1</sup>H NMR (400 MHz, CDCl<sub>3</sub>, 298 K)

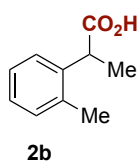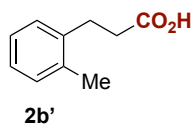

7.39  
7.38  
7.37  
7.34  
7.30  
7.29  
7.28  
7.26  
7.26  
7.25  
7.25  
7.24  
7.23  
7.22  
7.21

4.10  
4.08  
4.06  
4.04  
3.05  
3.03  
3.02  
3.01  
2.74  
2.72  
2.72  
2.71  
2.70  
2.47  
2.40  
1.59  
1.57

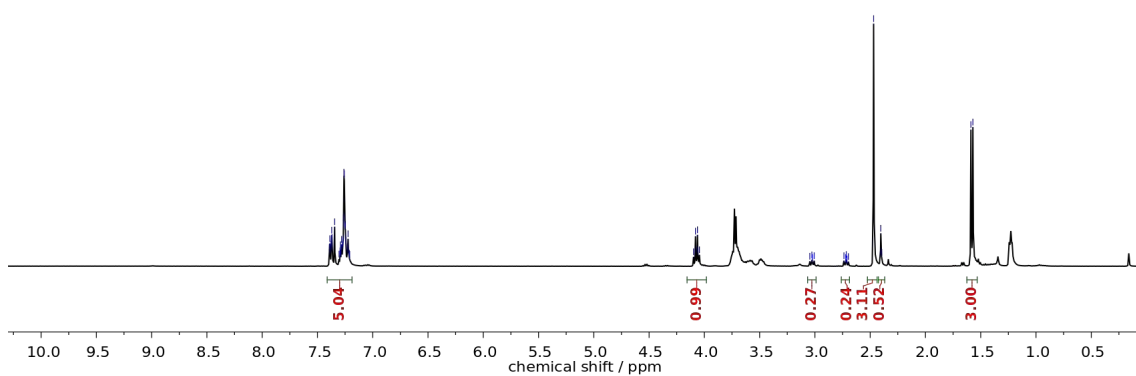

<sup>13</sup>C NMR (100 MHz, CDCl<sub>3</sub>, 298 K)

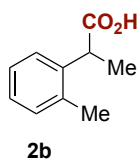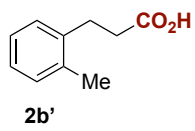

180.45  
178.81

138.50  
138.40  
136.10  
136.04  
130.68  
130.47  
128.56  
127.33  
126.69  
126.68  
126.65  
126.60  
126.31

77.16 CDCl<sub>3</sub>

41.19  
34.37  
28.10  
19.78  
19.37  
17.69

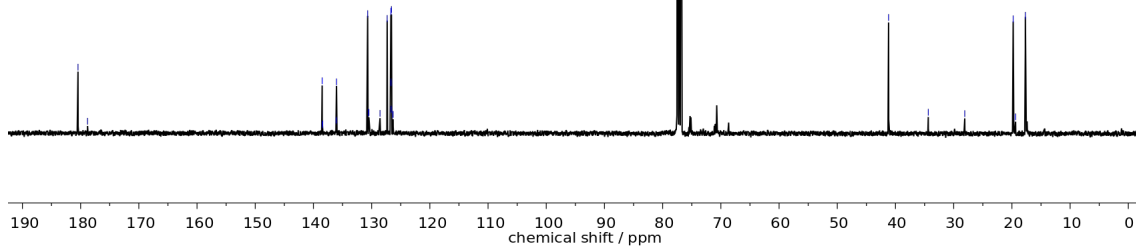

1H NMR (300 MHz, CDCl<sub>3</sub>, 294 K)

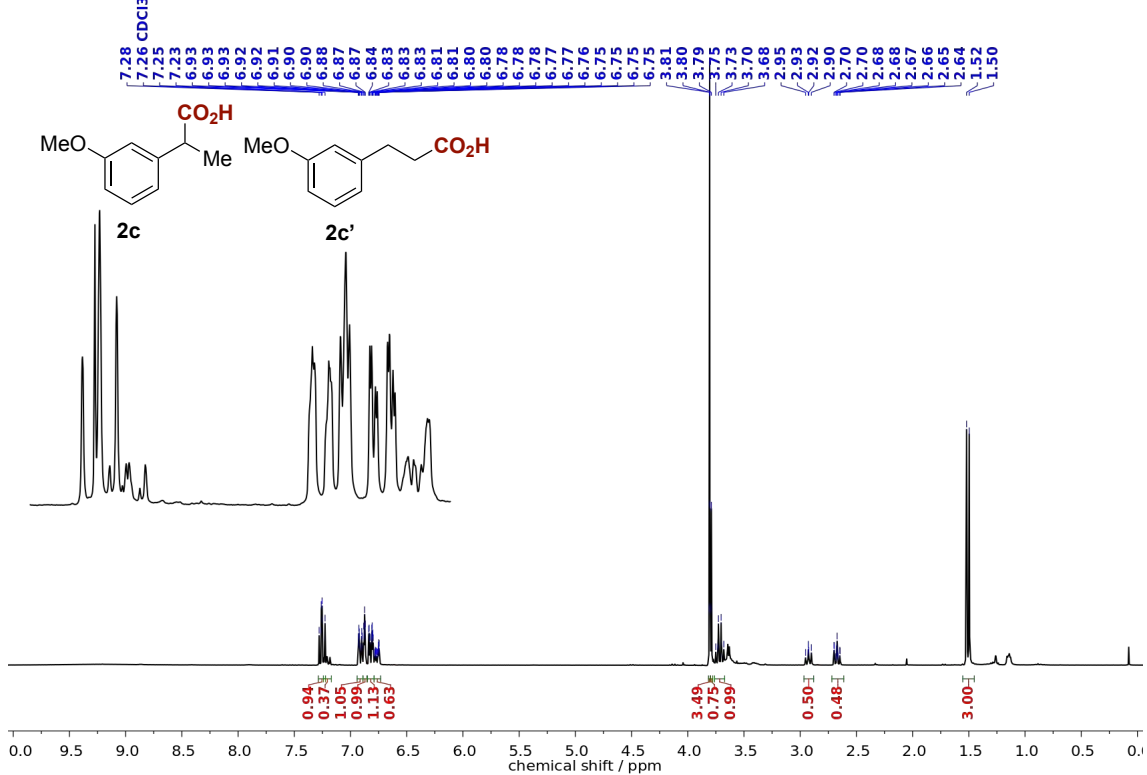

13C NMR (75. MHz, CDCl<sub>3</sub>, 294 K)

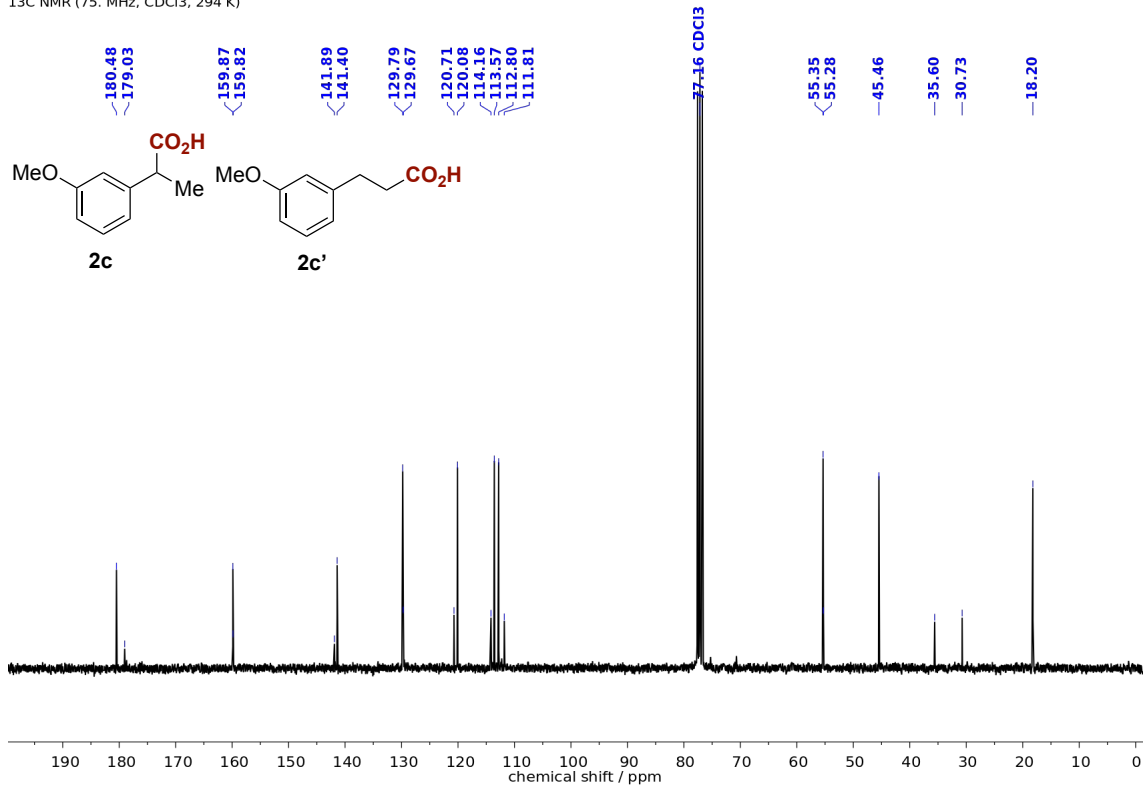

<sup>1</sup>H NMR (300 MHz, CDCl<sub>3</sub>, 294 K)

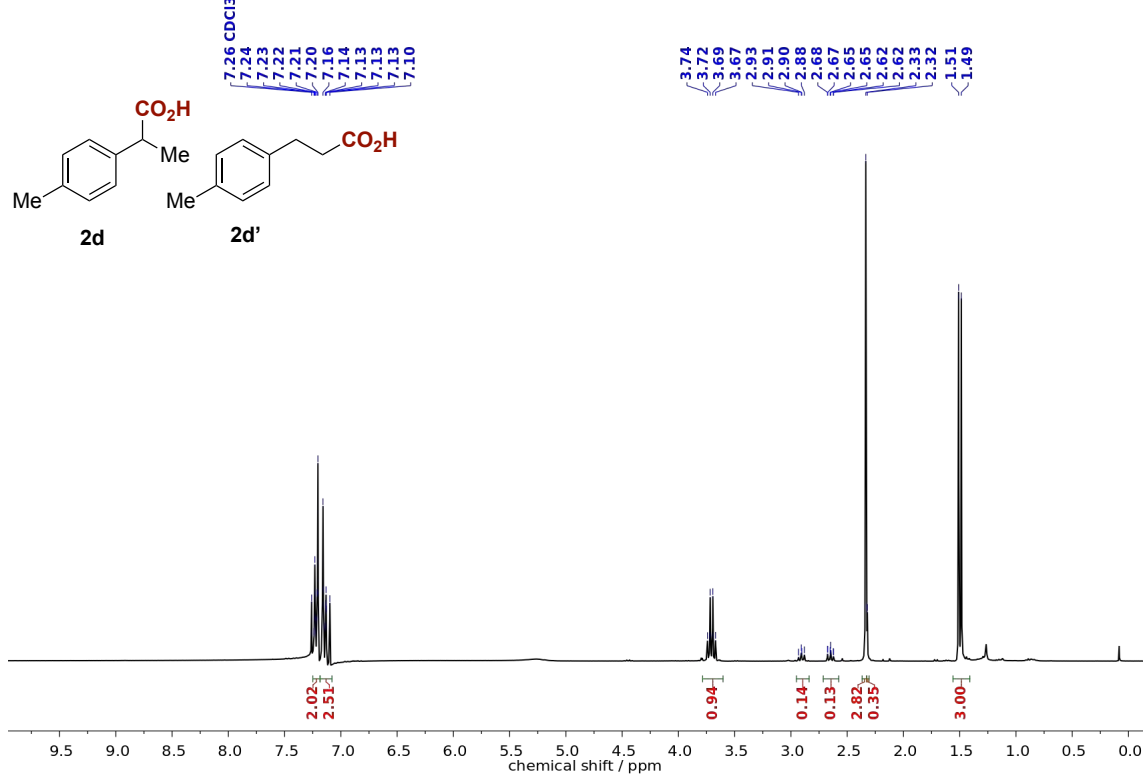

<sup>13</sup>C NMR (75. MHz, CDCl<sub>3</sub>, 294 K)

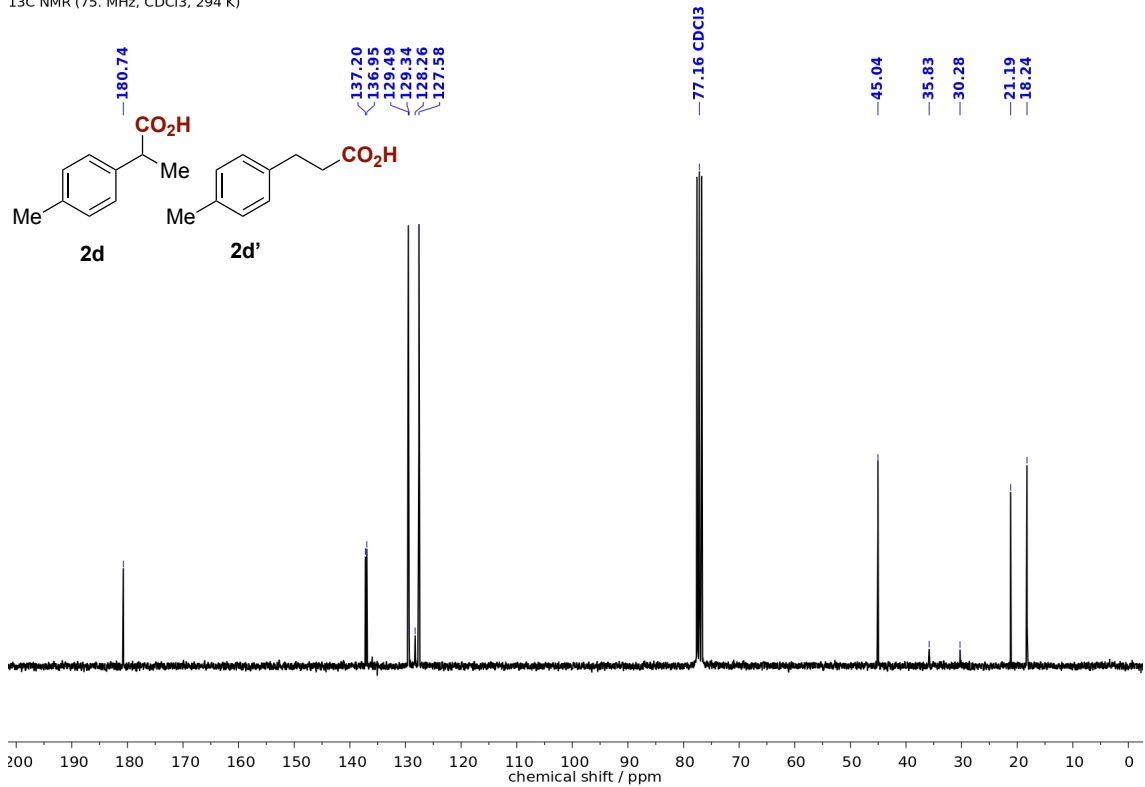

1H NMR (300 MHz, CDCl<sub>3</sub>, 294 K)

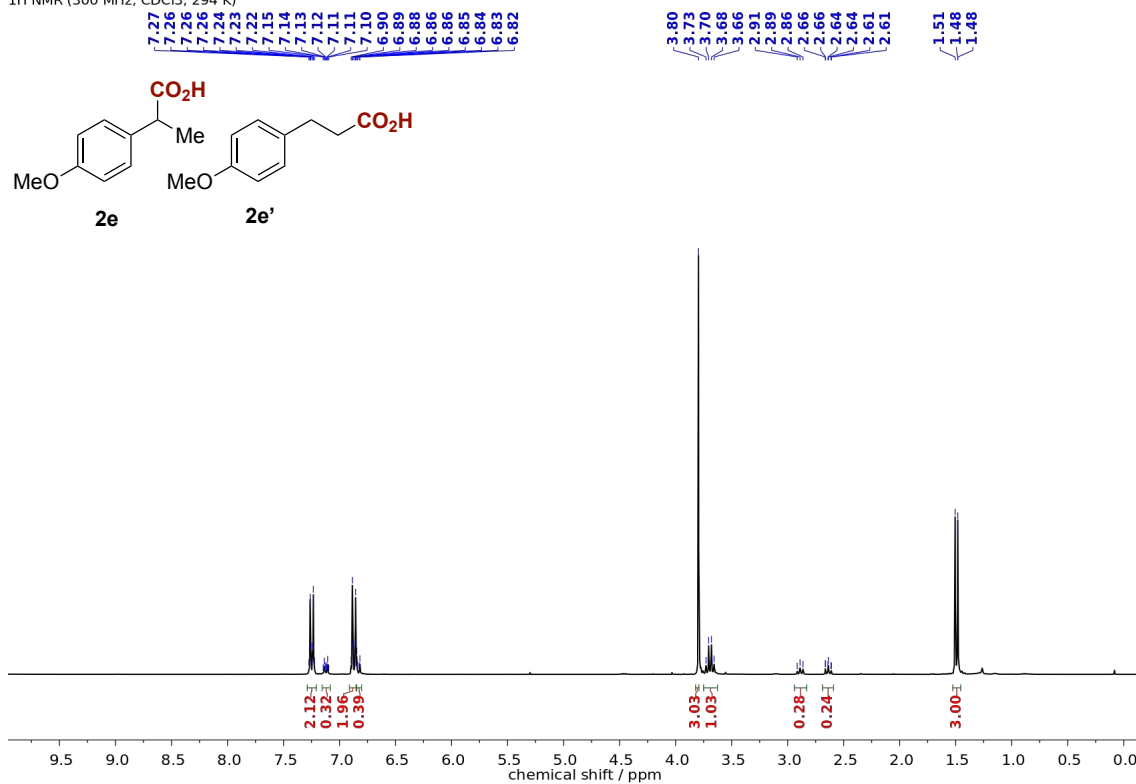

13C NMR (75. MHz, CDCl<sub>3</sub>, 294 K)

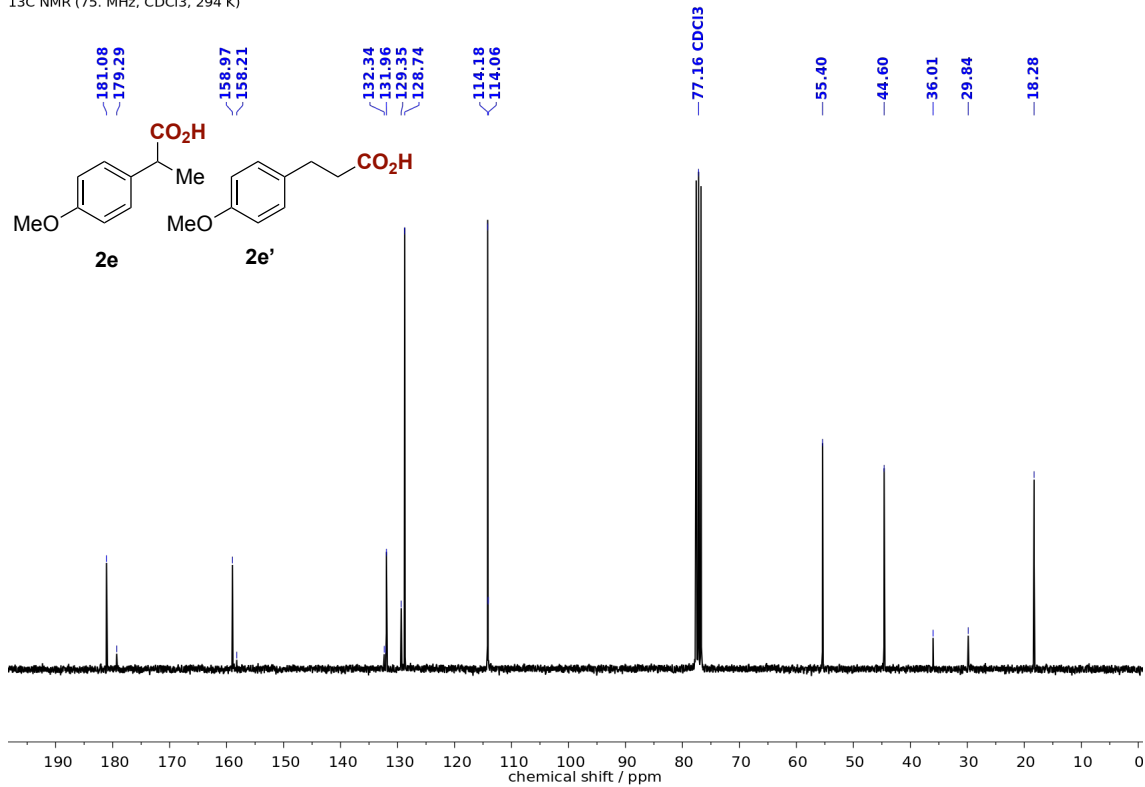

1H NMR (300 MHz, CDCl<sub>3</sub>, 294 K)

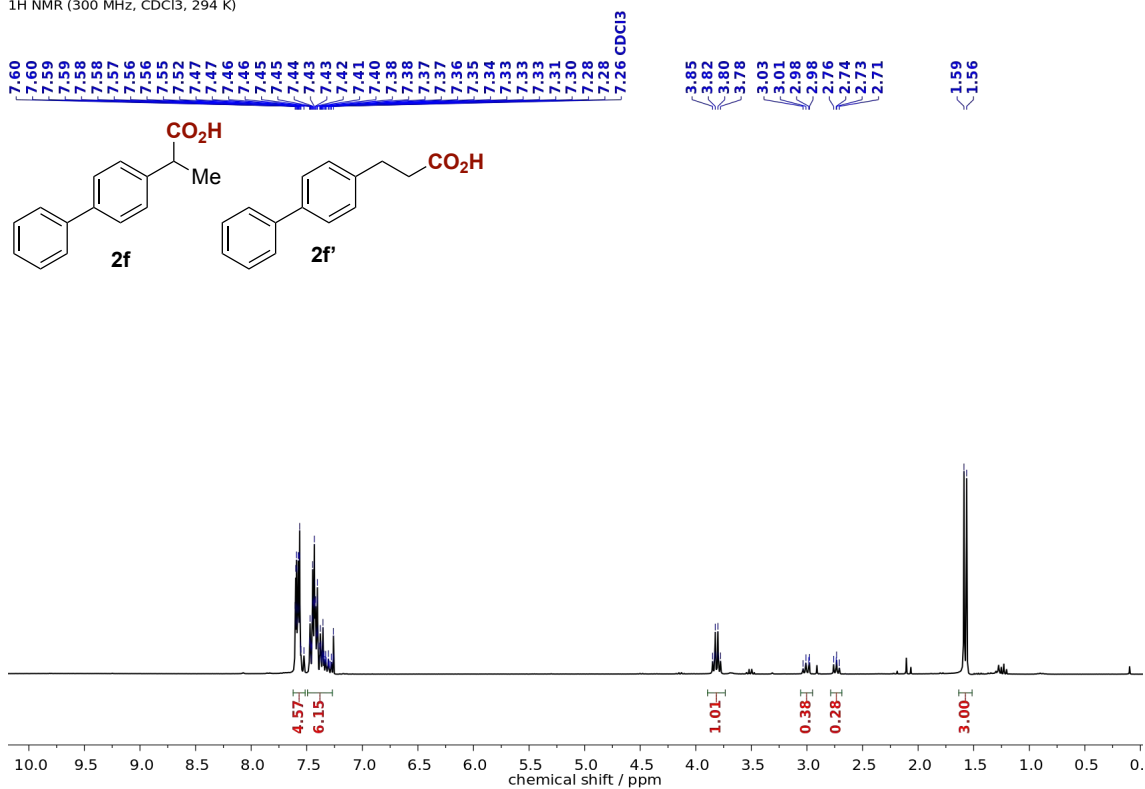

13C NMR (75. MHz, CDCl<sub>3</sub>, 294 K)

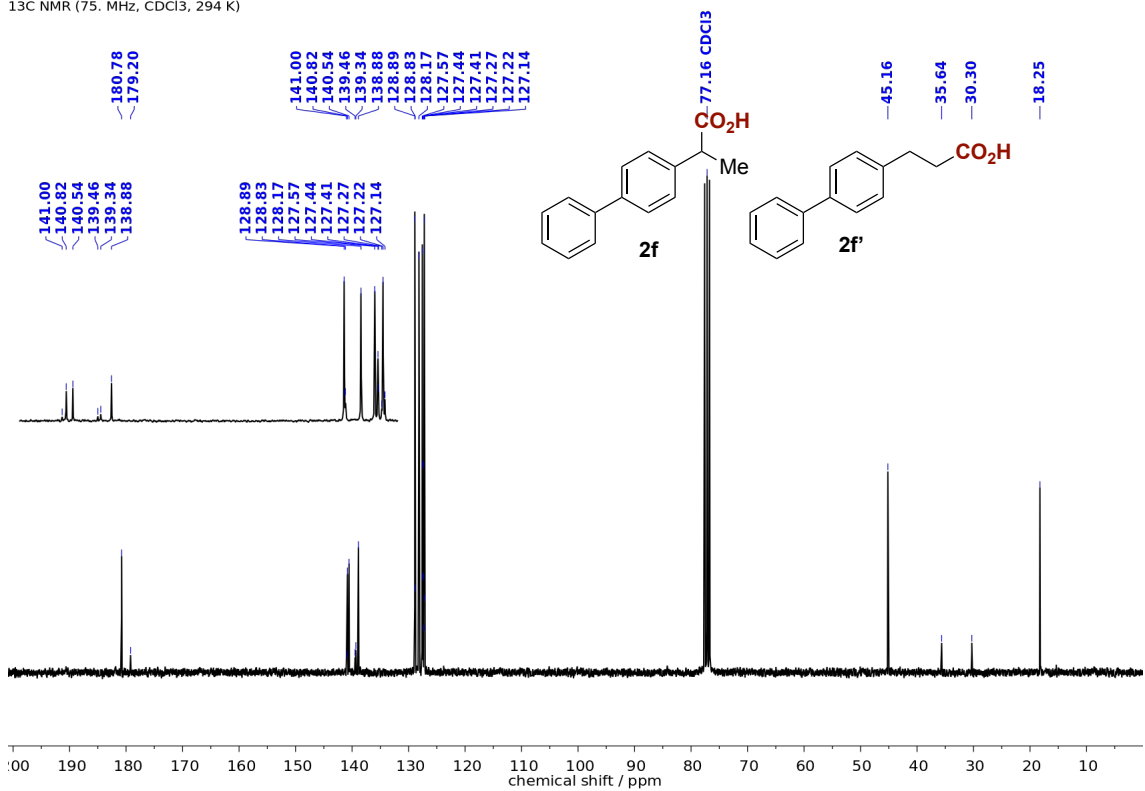



1H NMR (400 MHz, Acetone, 298 K)

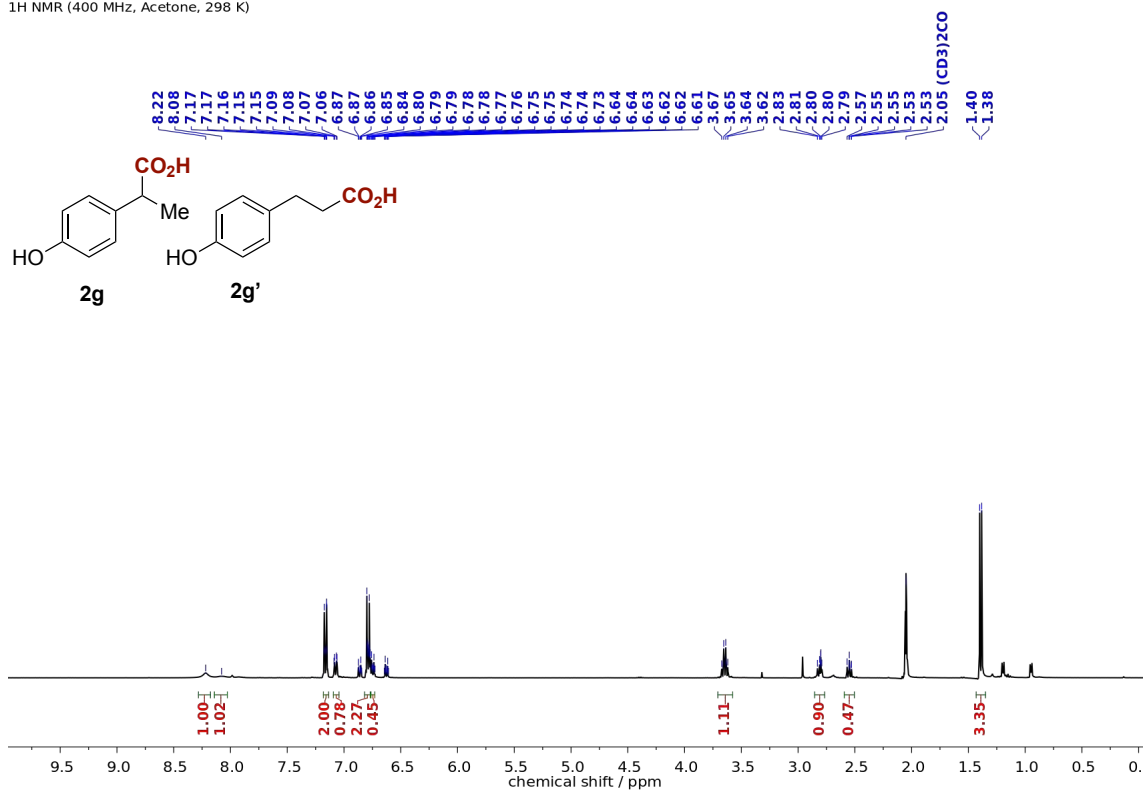

13C NMR (100 MHz, Acetone, 298 K)

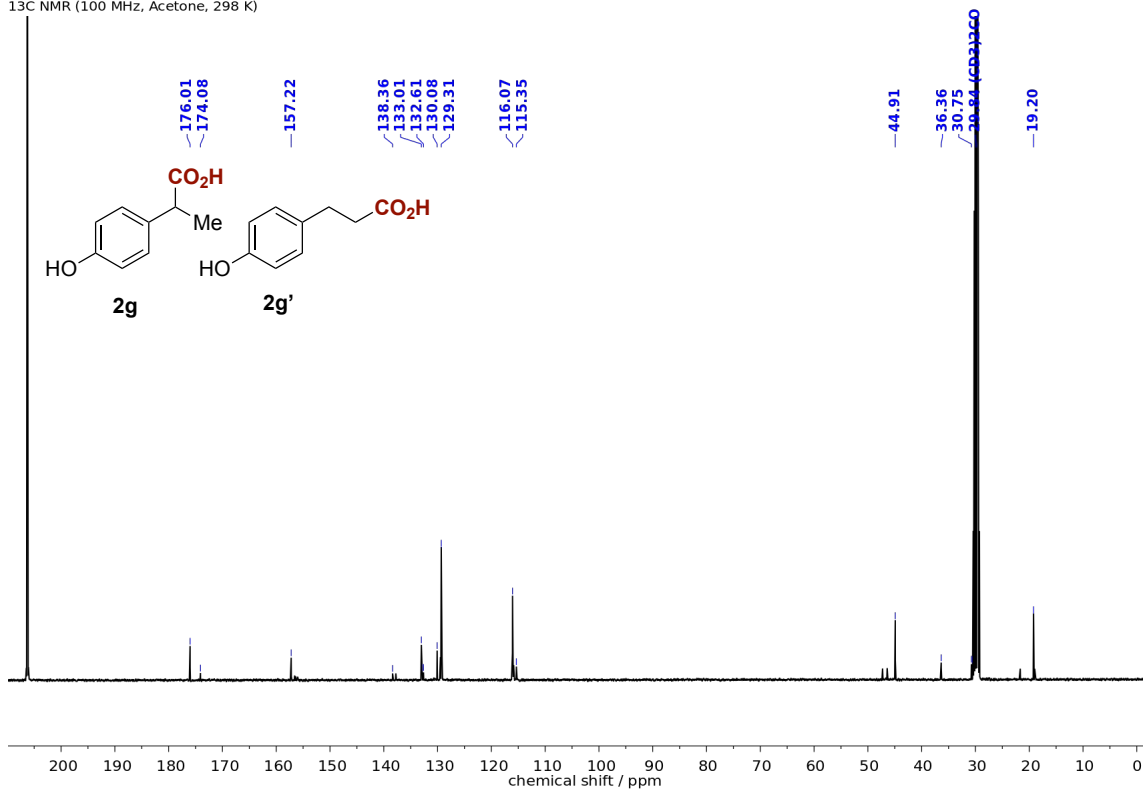

<sup>1</sup>H NMR (400 MHz, Acetone, 298 K)

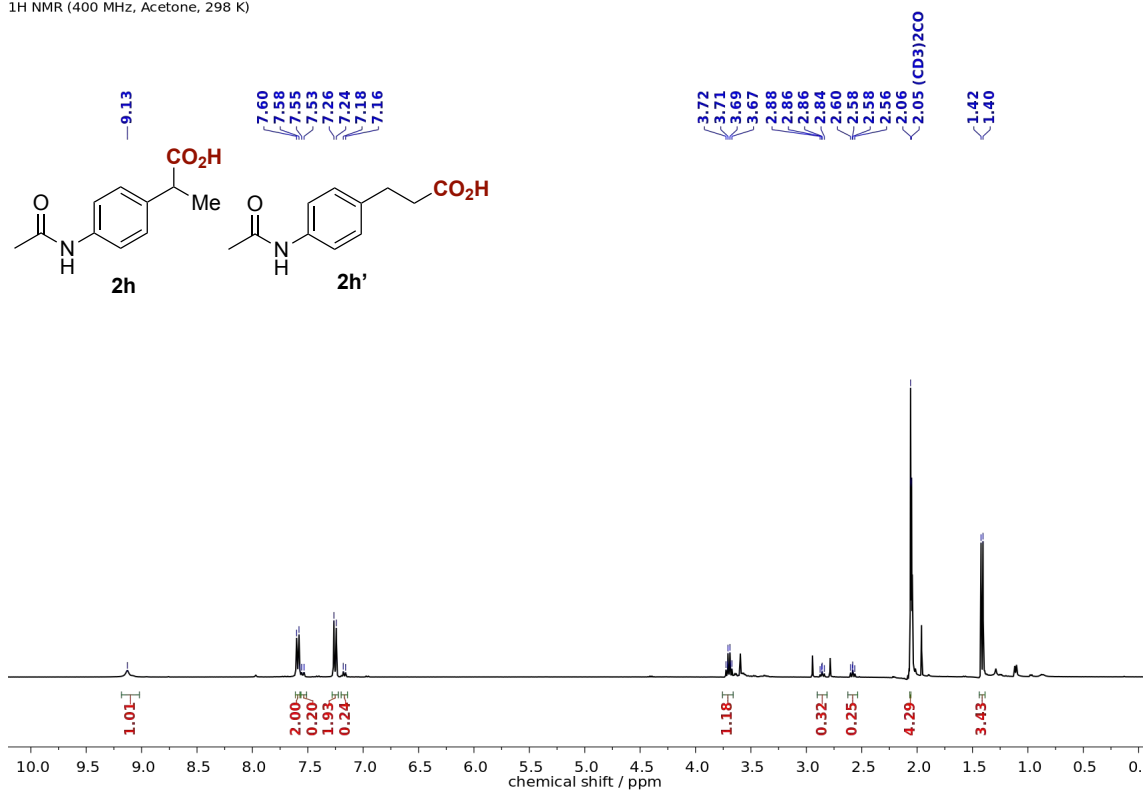

<sup>13</sup>C NMR (100 MHz, Acetone, 298 K)

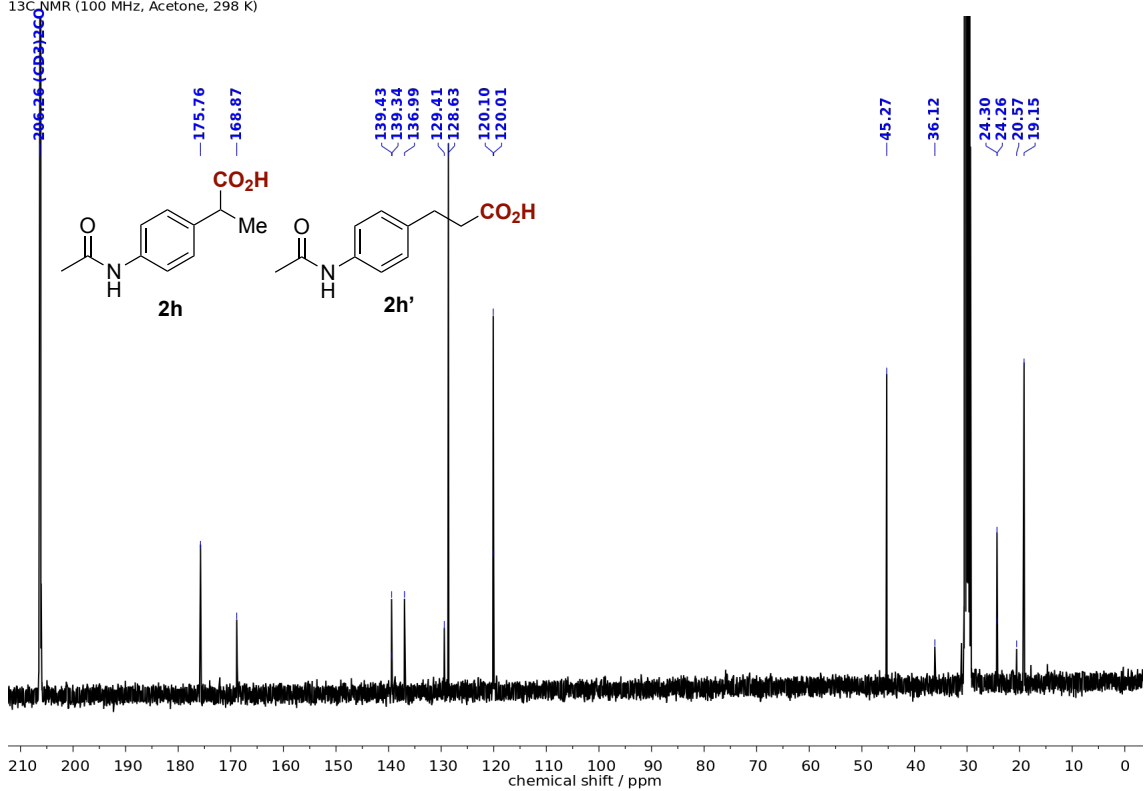

1H NMR (400 MHz, CDCl<sub>3</sub>, 298 K)

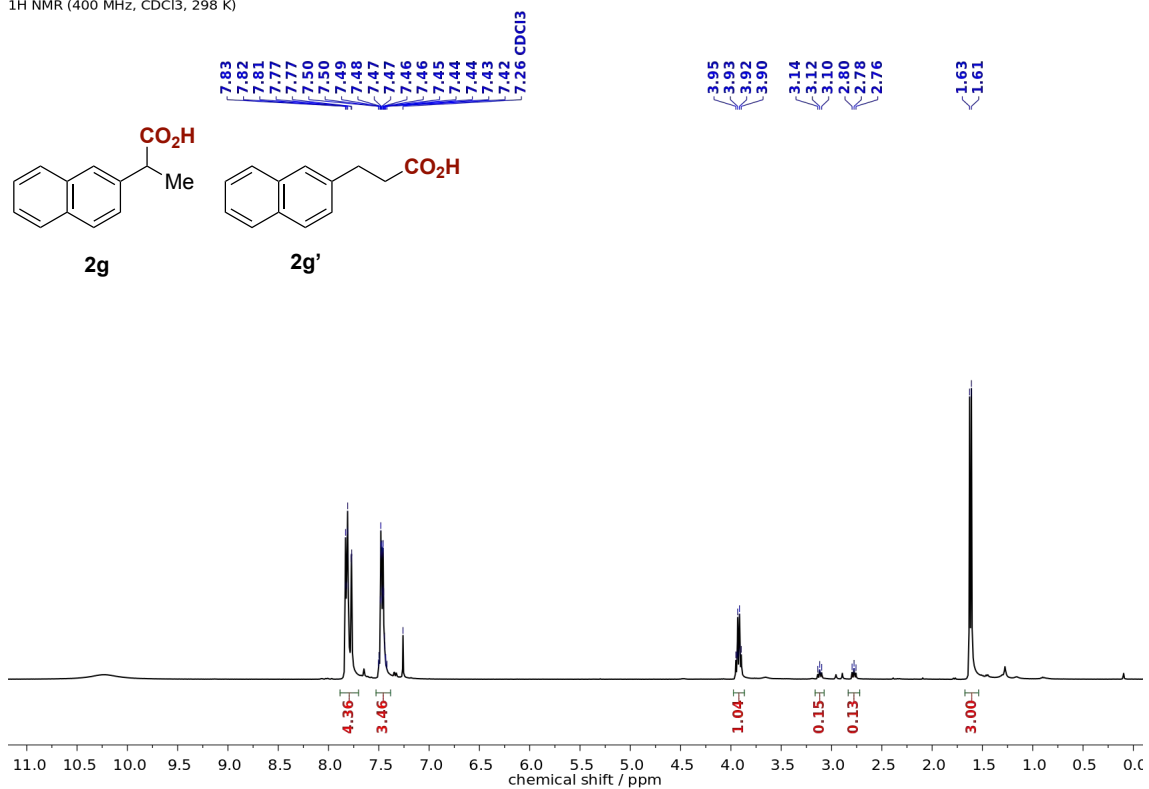

13C NMR (100 MHz, CDCl<sub>3</sub>, 298 K)

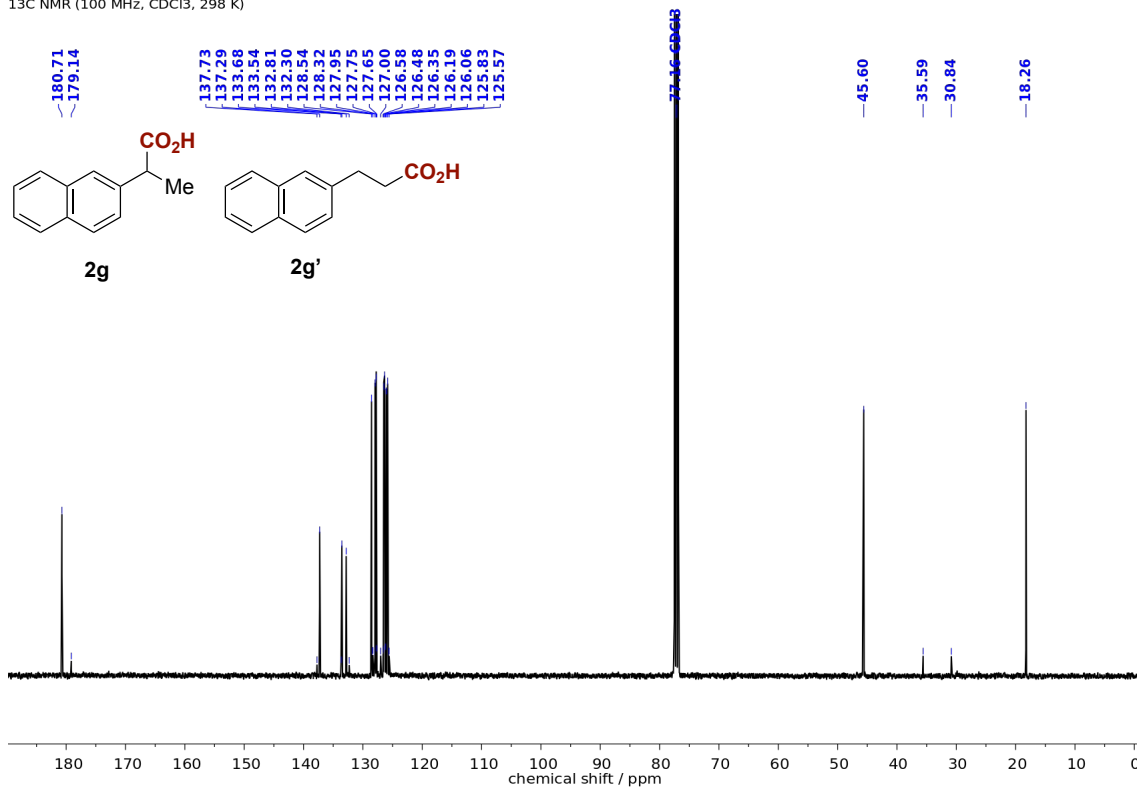

<sup>1</sup>H NMR (400 MHz, CDCl<sub>3</sub>, 298 K)

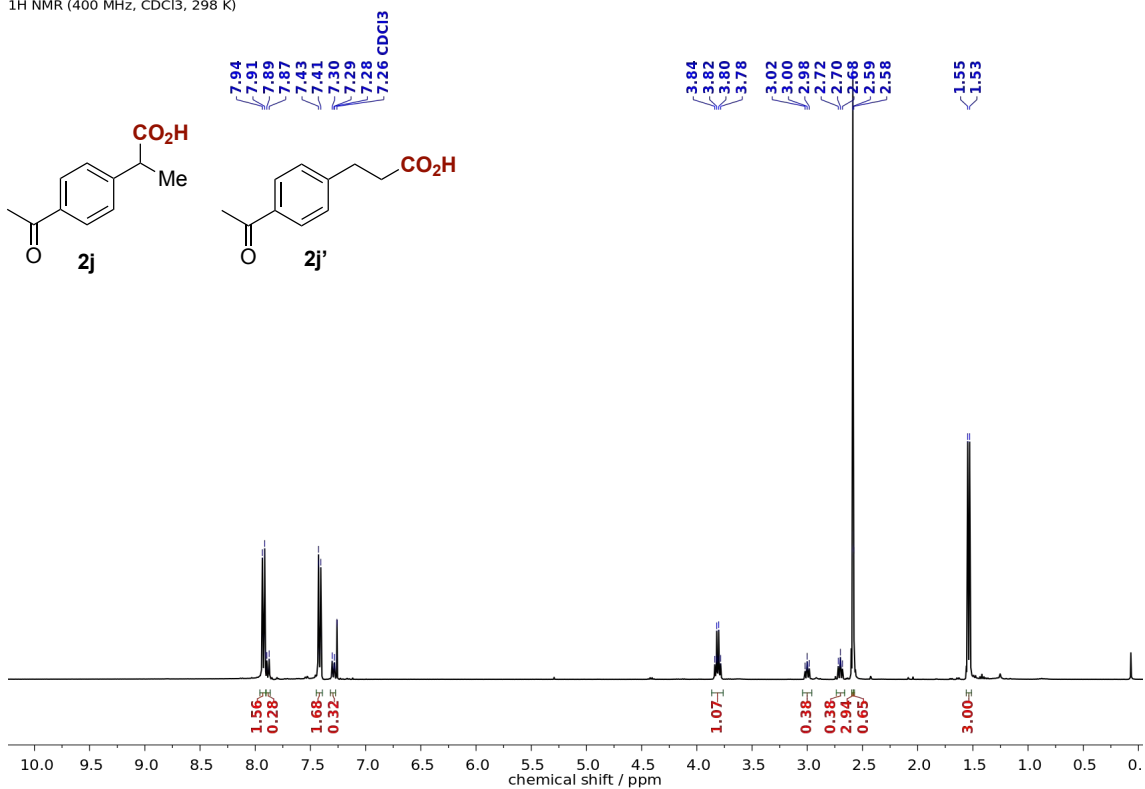

<sup>13</sup>C NMR (100 MHz, CDCl<sub>3</sub>, 298 K)

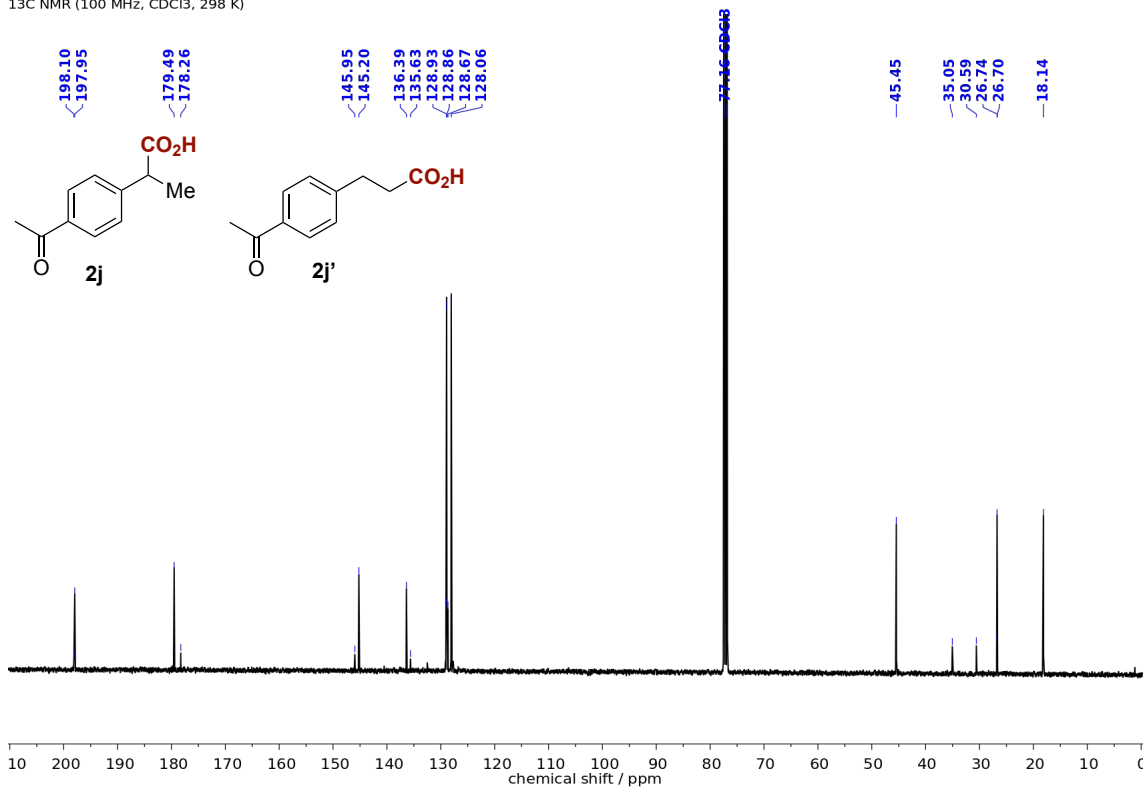

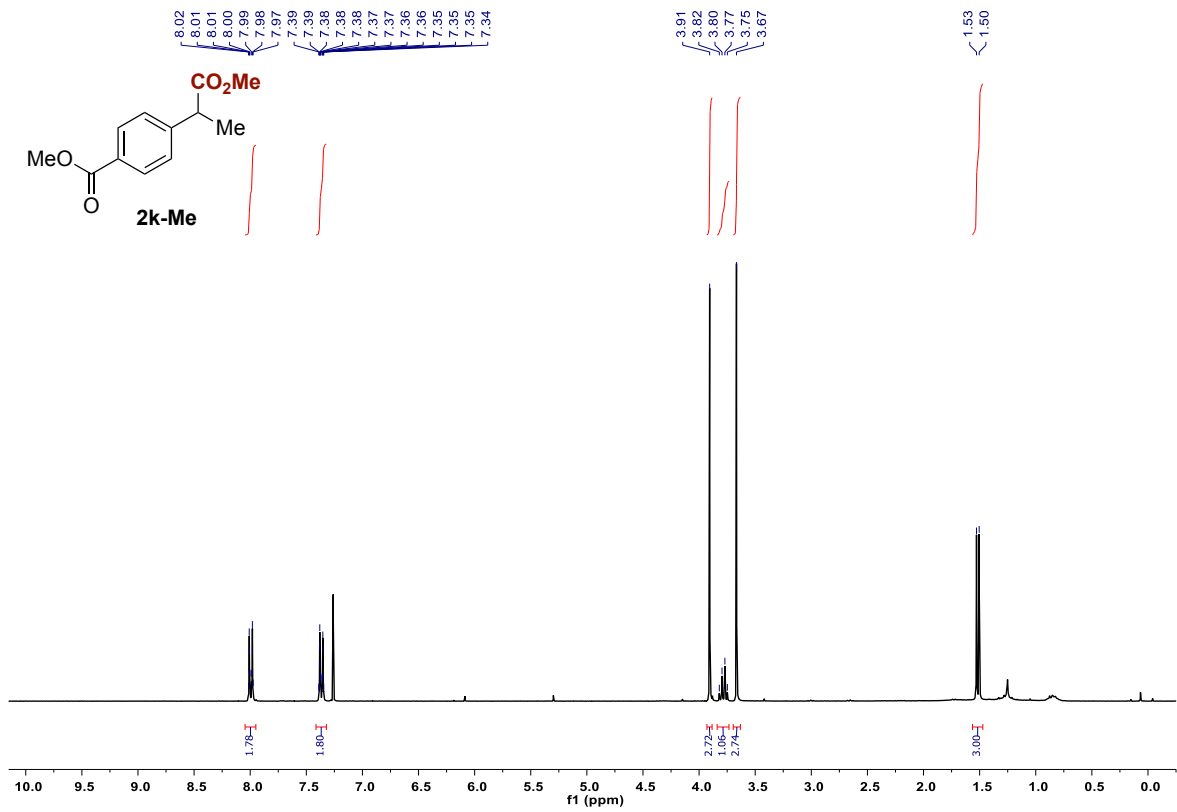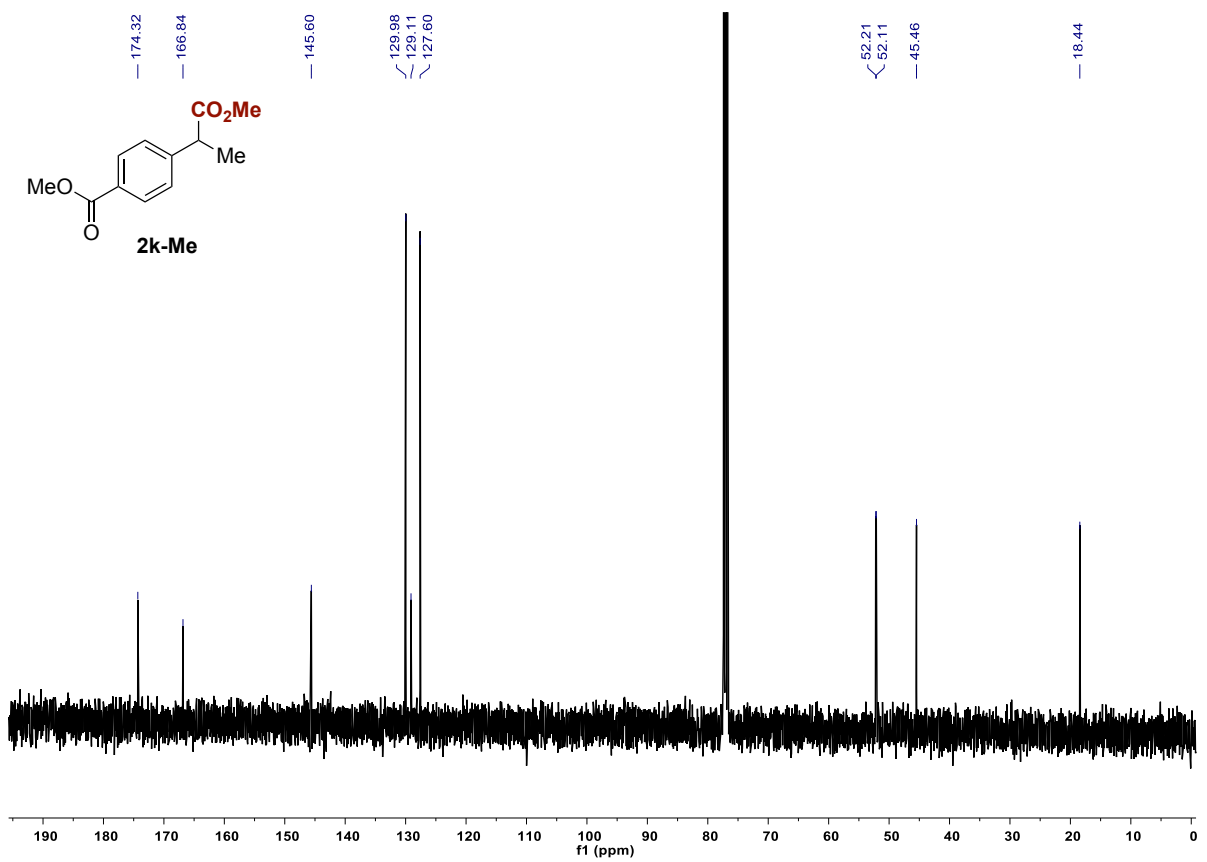

1H NMR (400 MHz, CDCl<sub>3</sub>, 298 K)

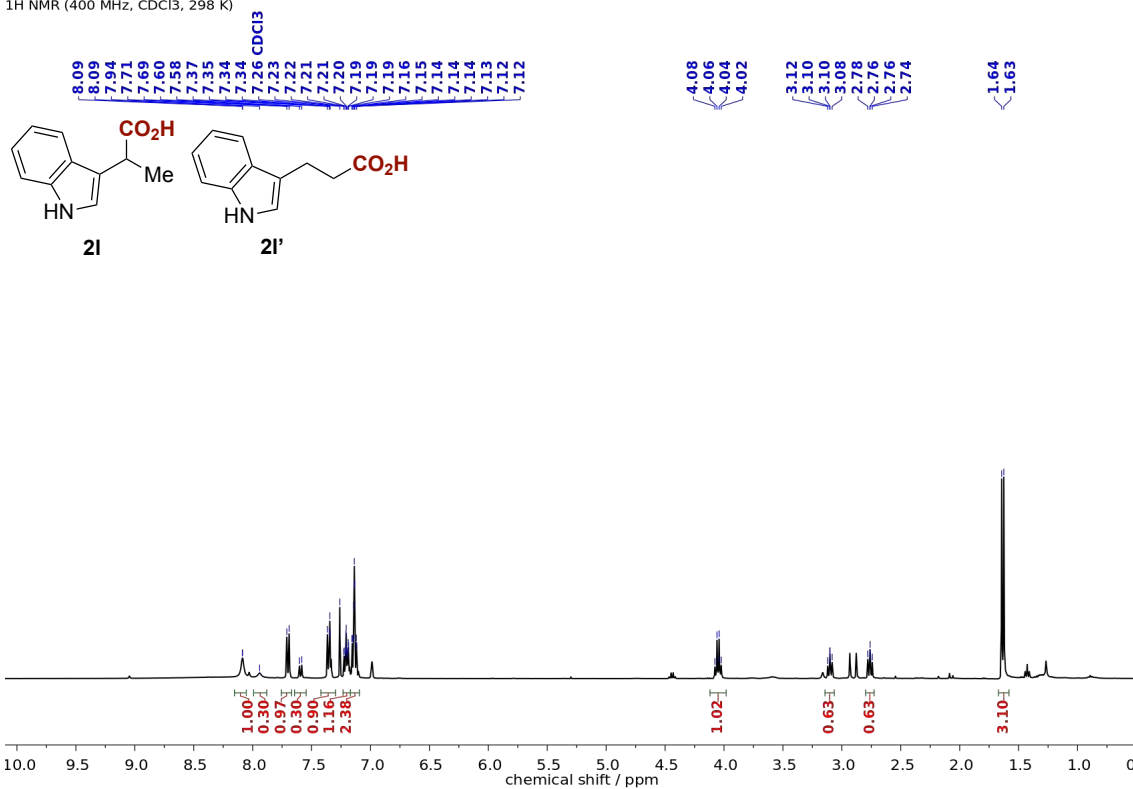

13C NMR (100 MHz, CDCl<sub>3</sub>, 298 K)

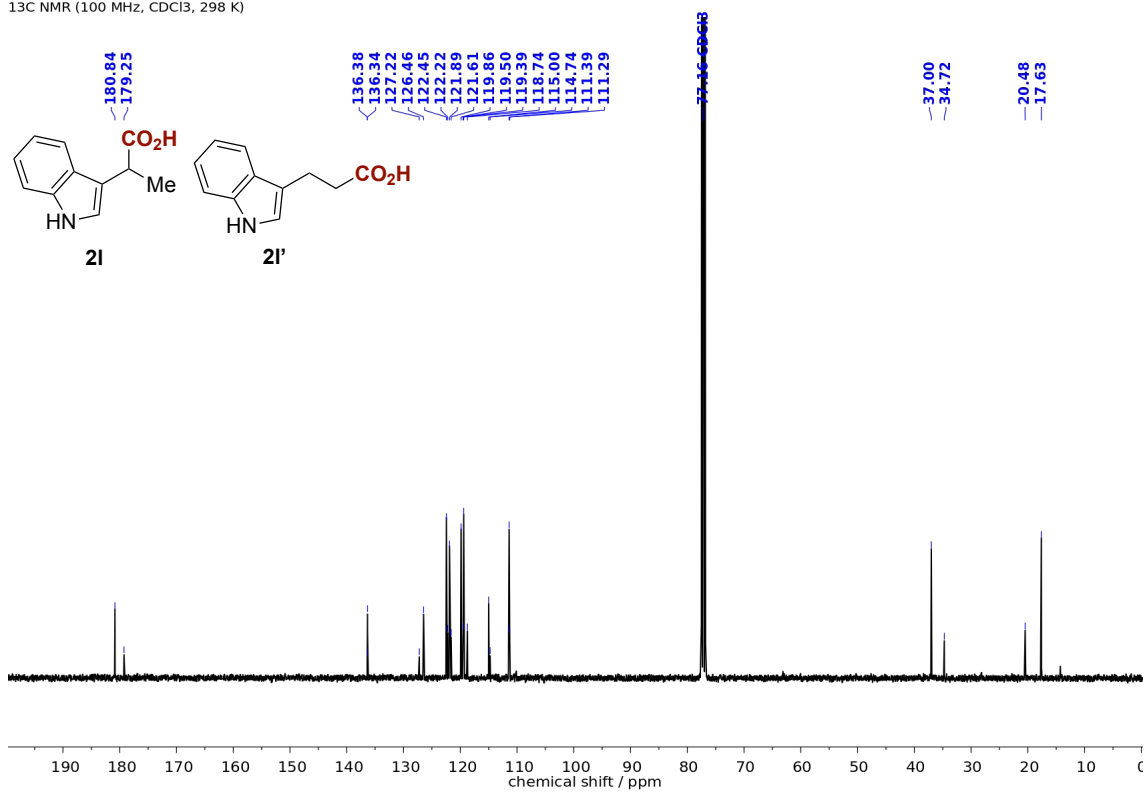

1H NMR (400 MHz, CDCl<sub>3</sub>, 298 K)

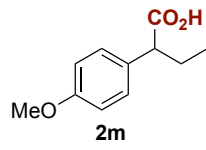

7.25  
7.24  
7.23  
7.22  
7.21  
6.88  
6.87  
6.85  
6.84

3.79  
3.43  
3.41  
3.39  
2.11  
2.09  
2.08  
2.06  
2.04  
2.02  
1.83  
1.81  
1.80  
1.78  
1.76  
1.74  
1.72  
0.92  
0.88

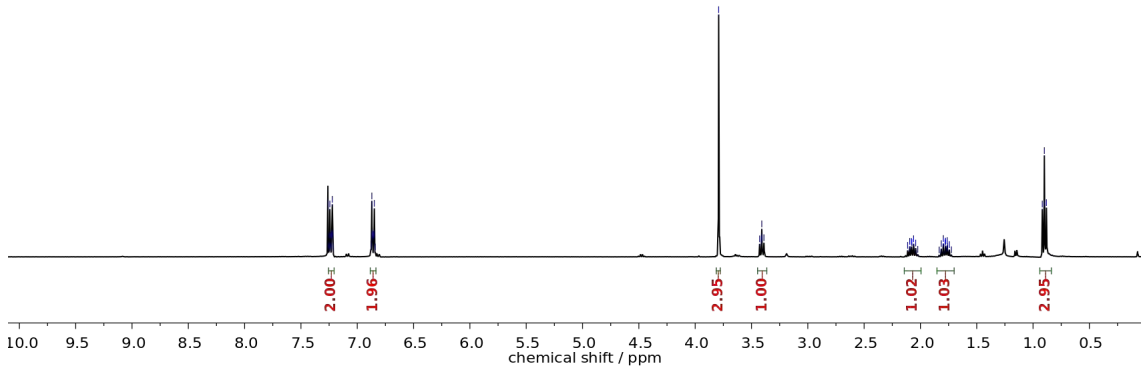

13C NMR (100 MHz, CDCl<sub>3</sub>, 298 K)

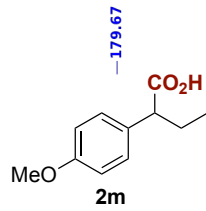

179.67

159.05

130.61

129.21

114.17

77.16 CDCl<sub>3</sub>

55.40

52.45

26.46

12.21

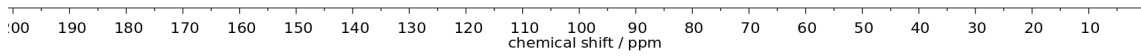

1H NMR (400 MHz, CDCl<sub>3</sub>, 298 K)

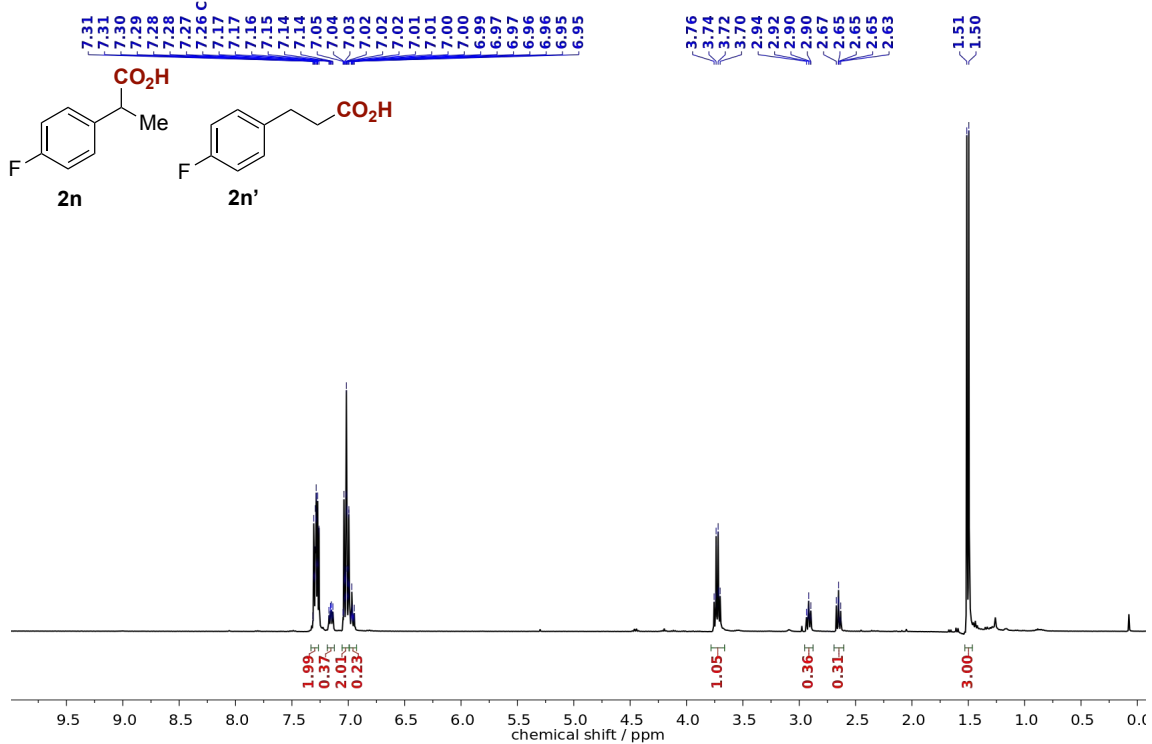

13C NMR (100 MHz, CDCl<sub>3</sub>, 298 K)

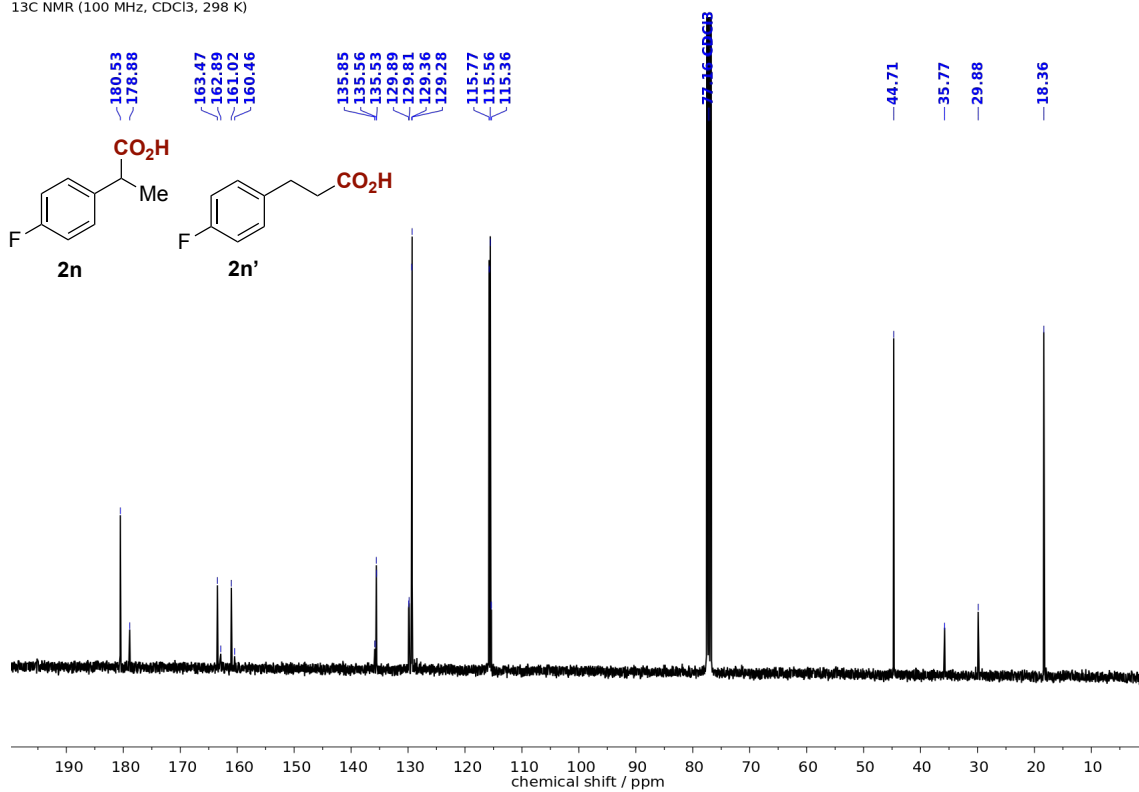



<sup>1</sup>H NMR (300 MHz, CDCl<sub>3</sub>, 294 K)

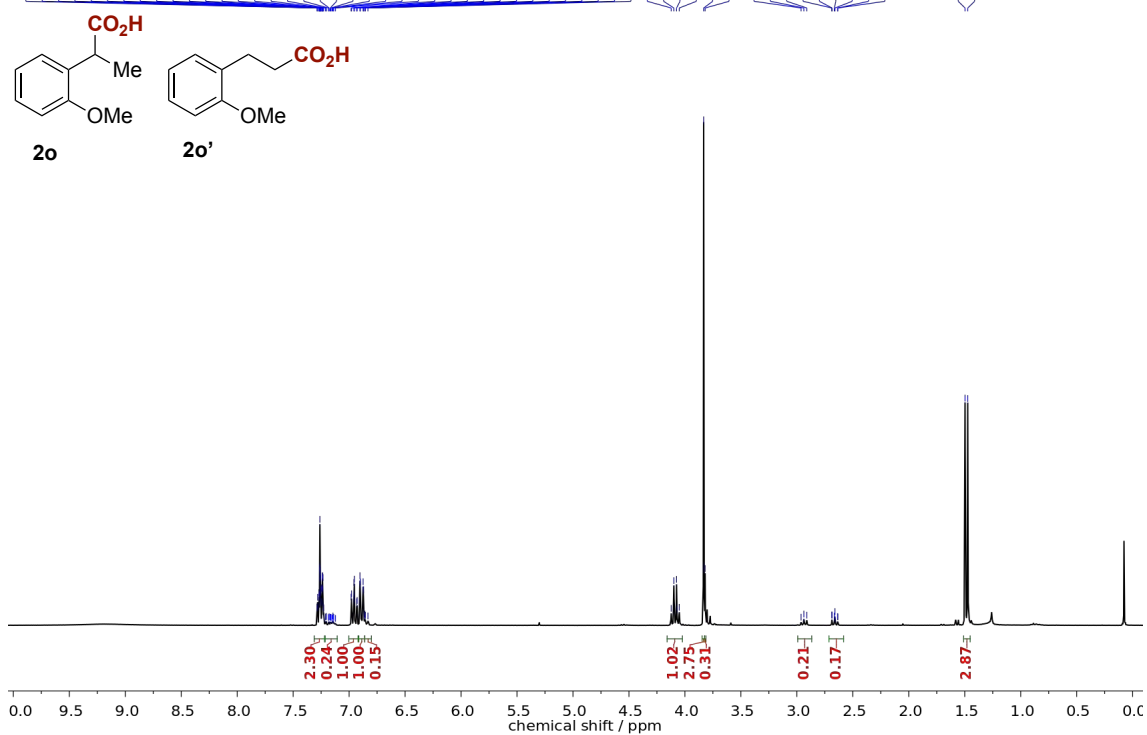

<sup>13</sup>C NMR (75. MHz, CDCl<sub>3</sub>, 295 K)

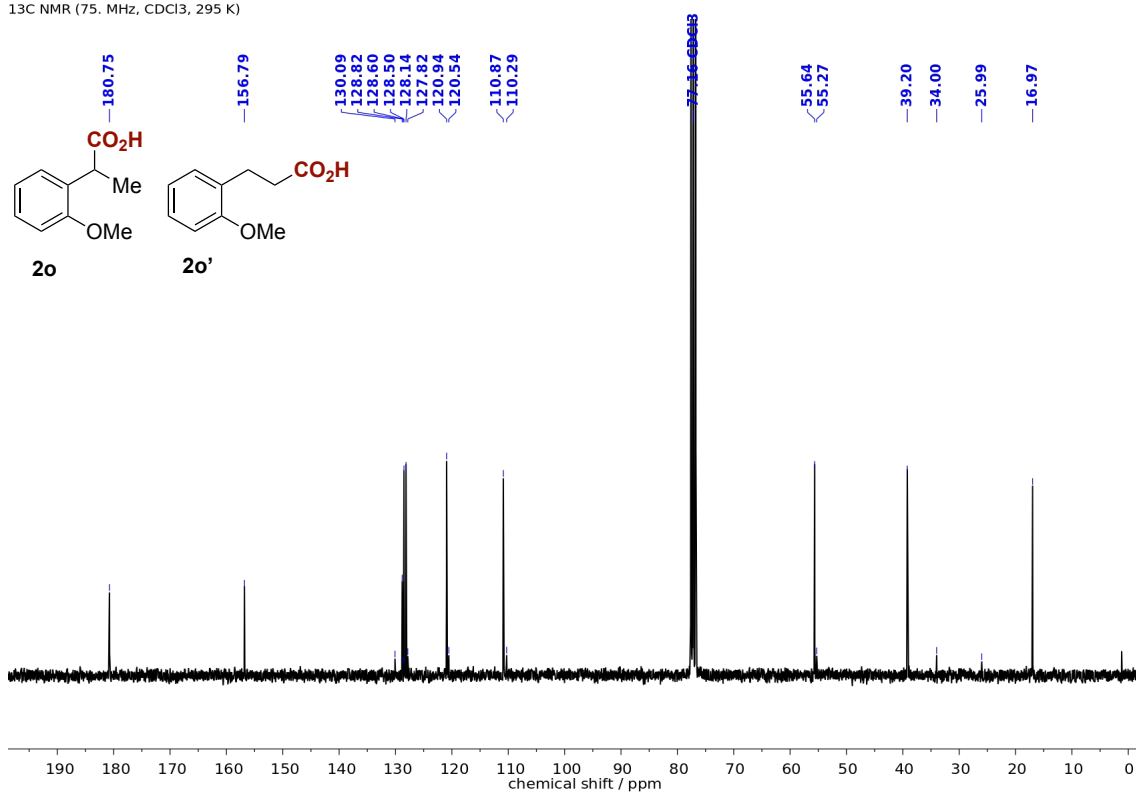

1H NMR (300 MHz, CDCl<sub>3</sub>, 294 K)

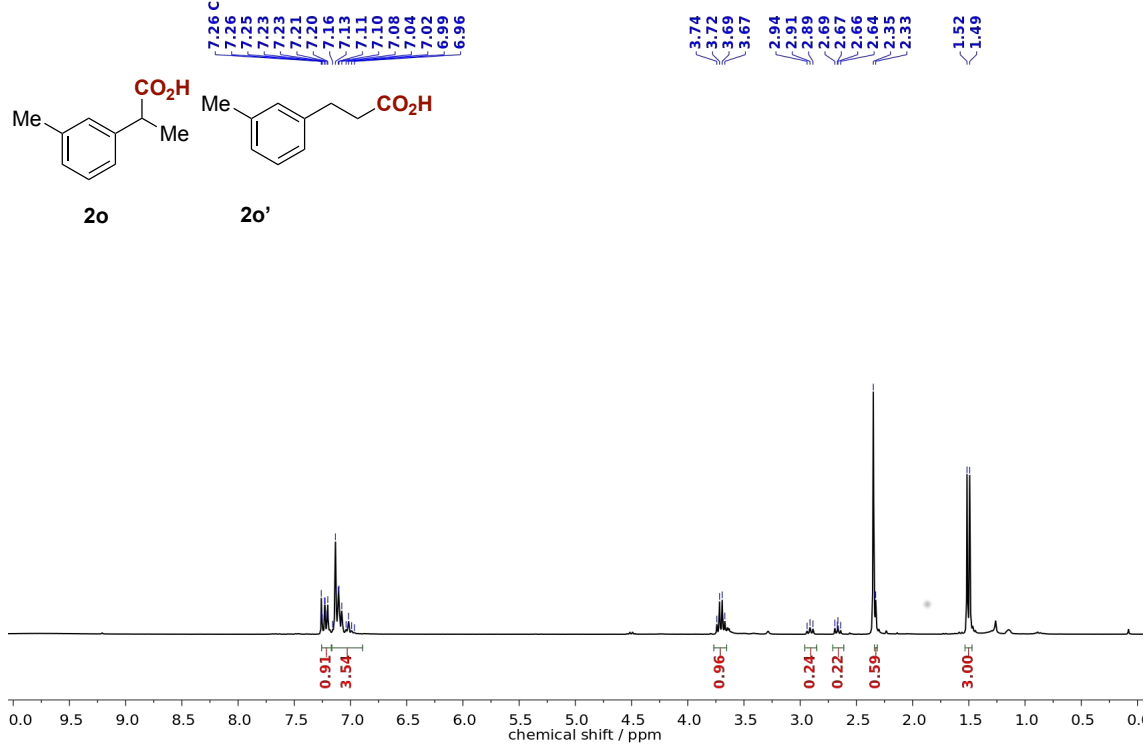

13C NMR (75. MHz, CDCl<sub>3</sub>, 294 K)

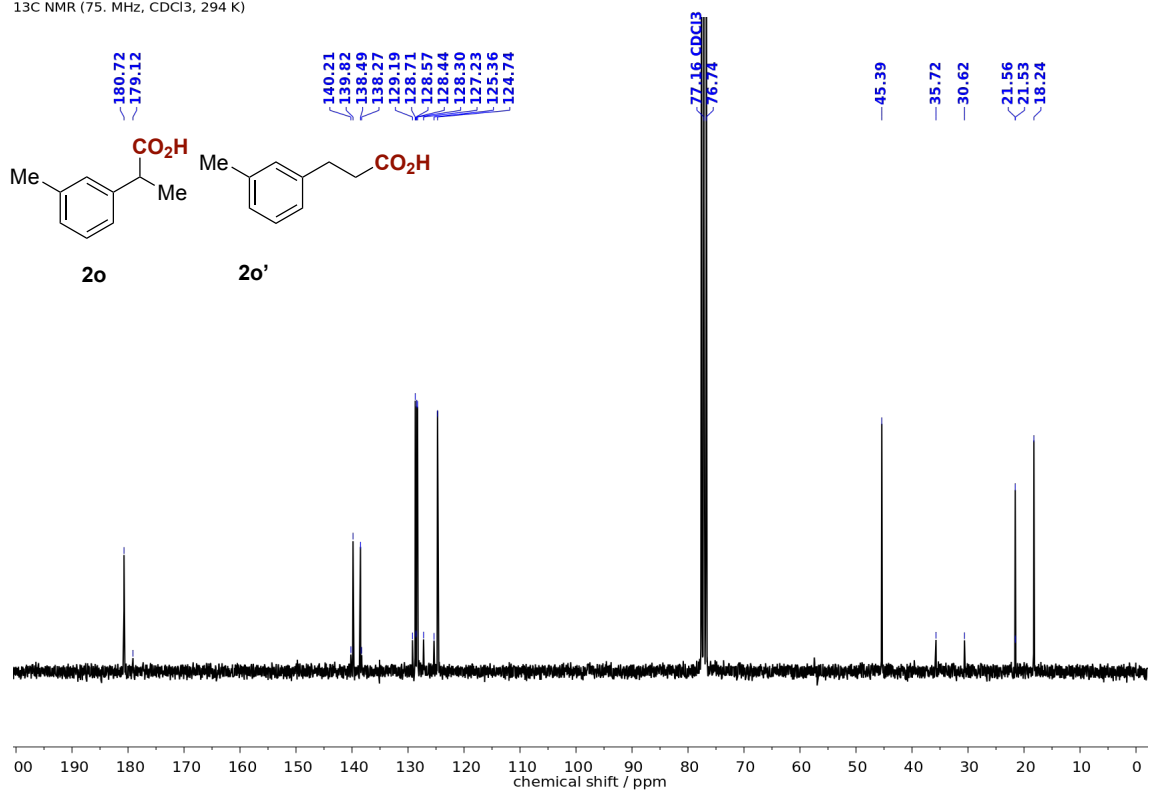

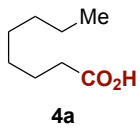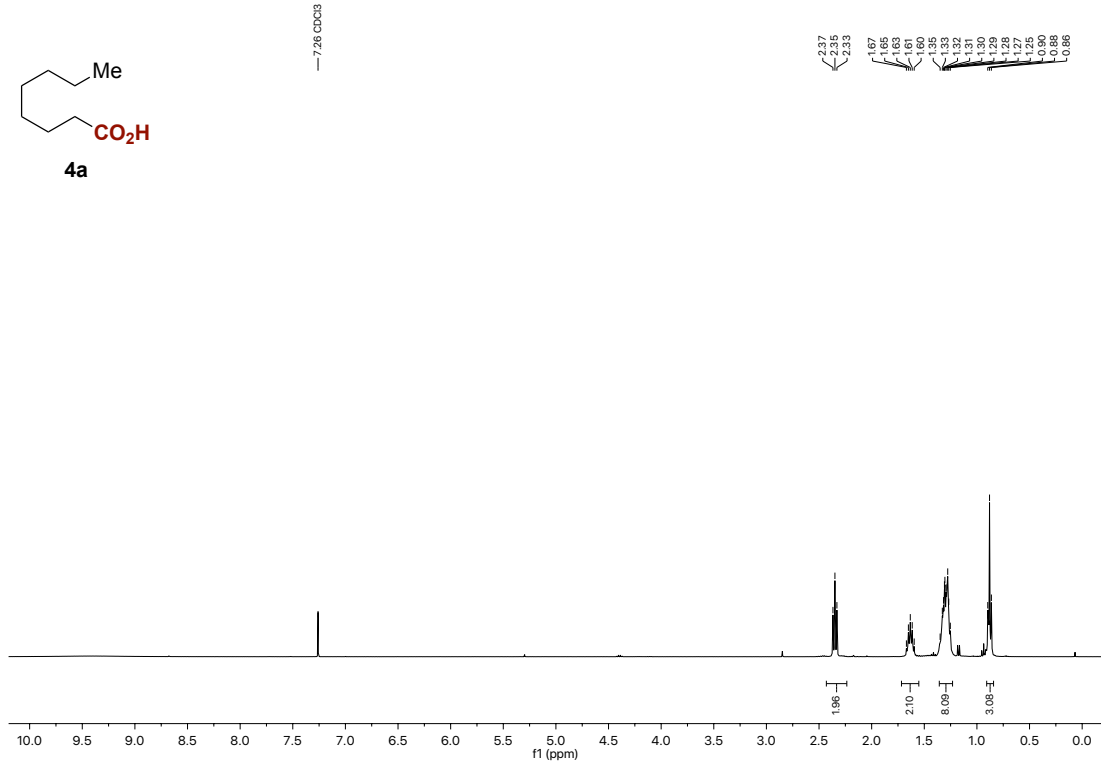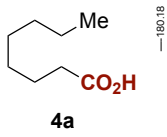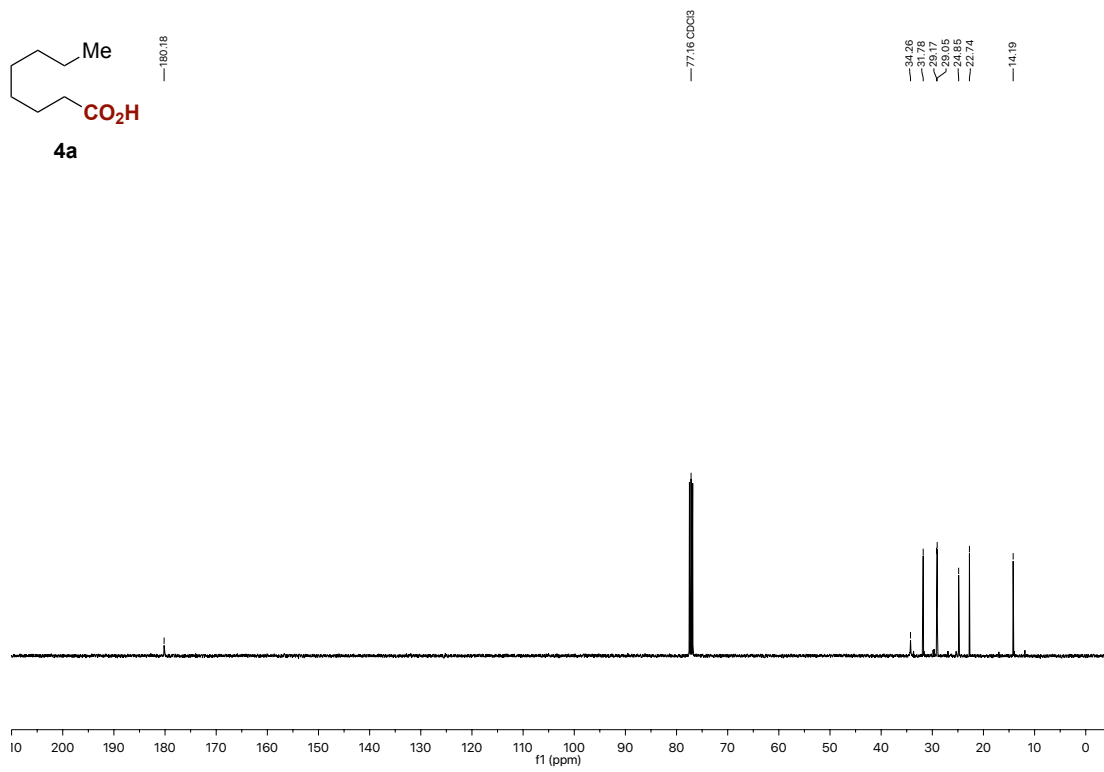

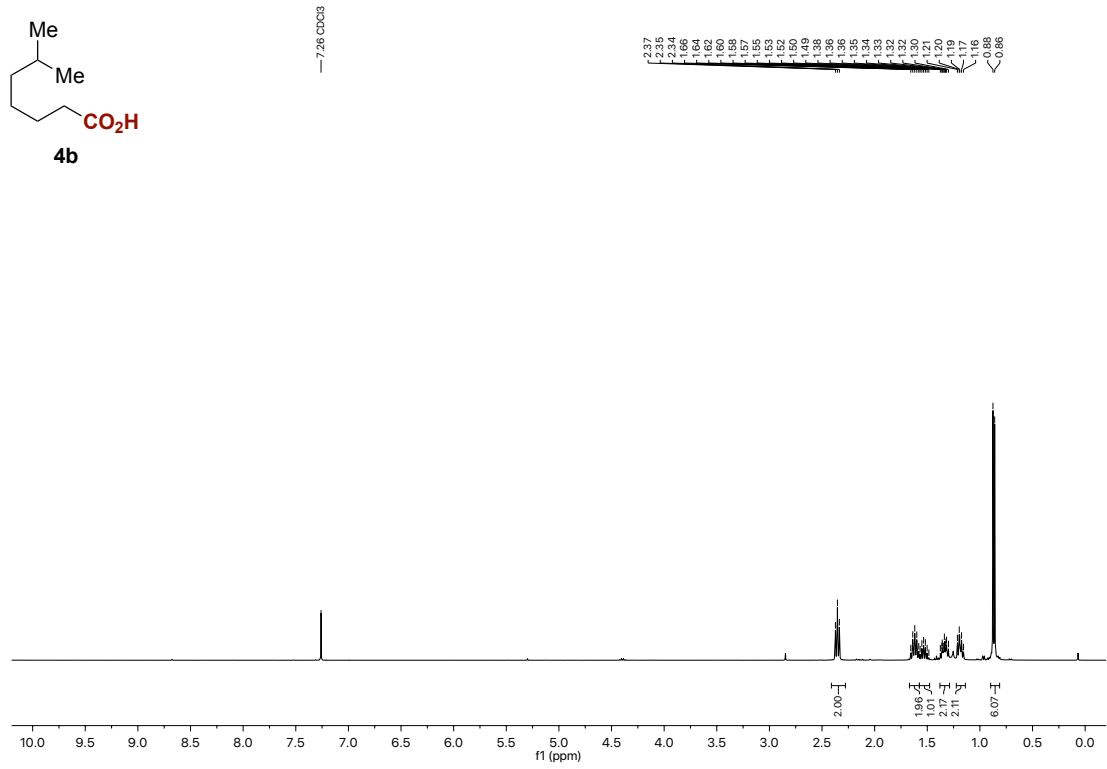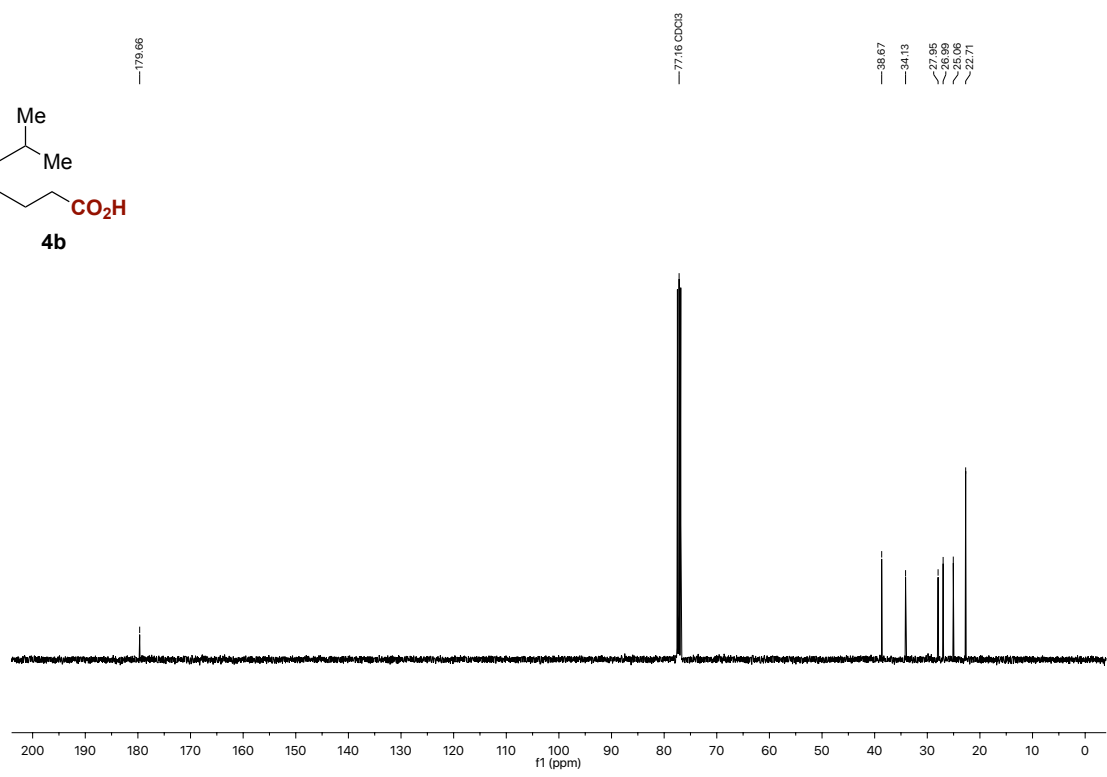

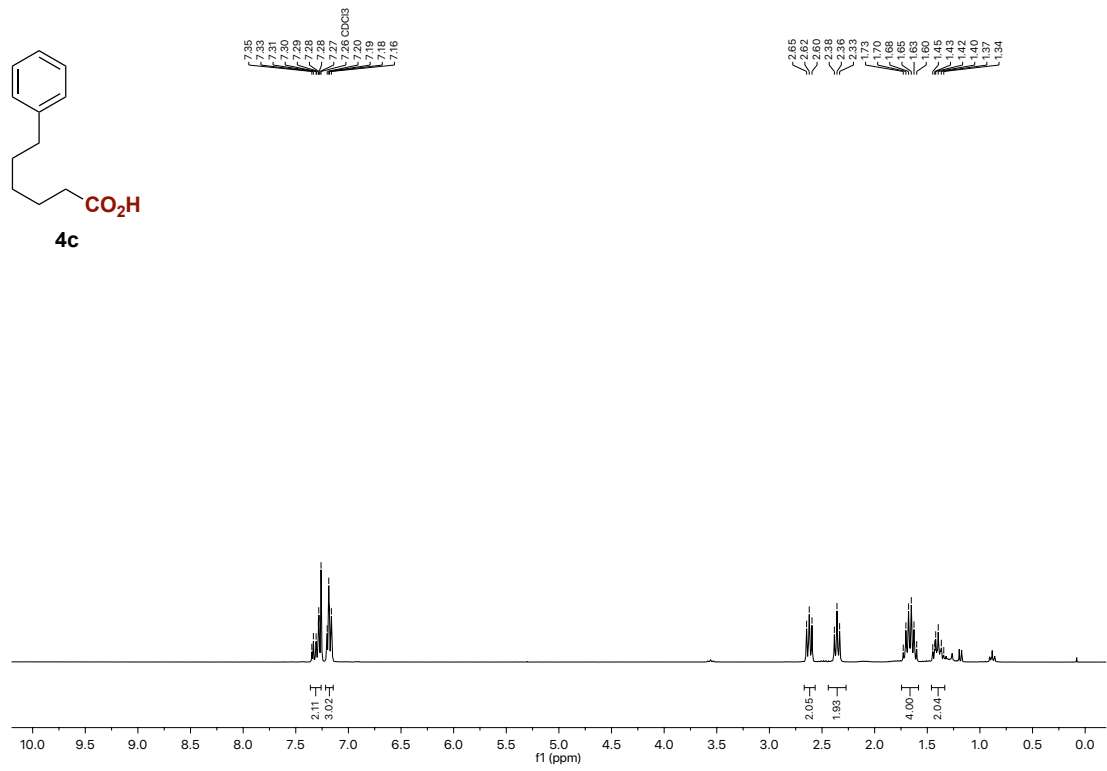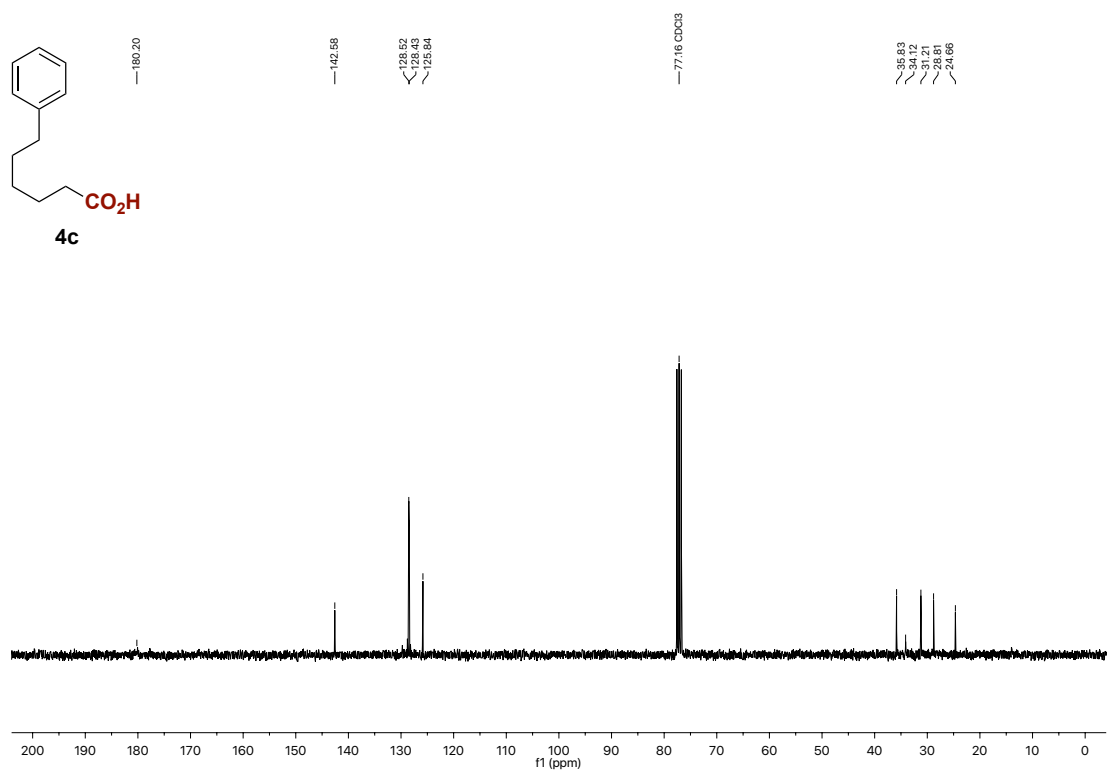

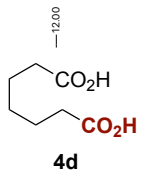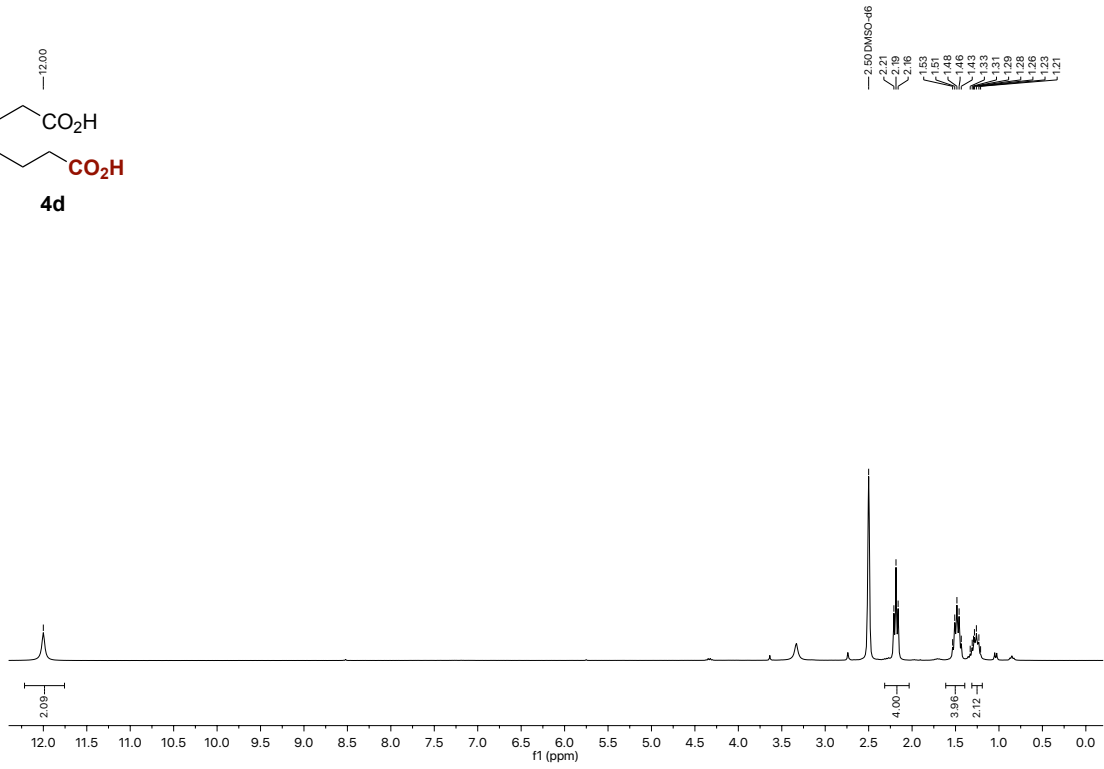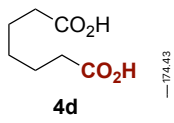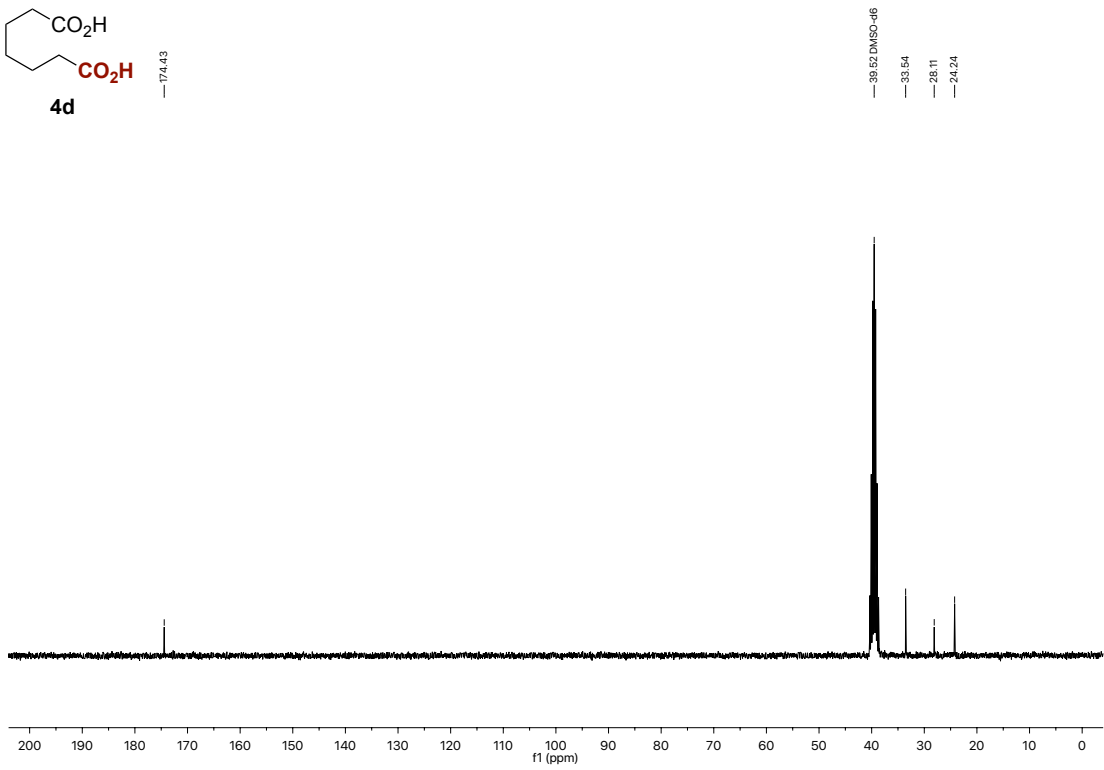

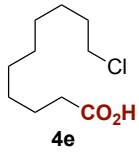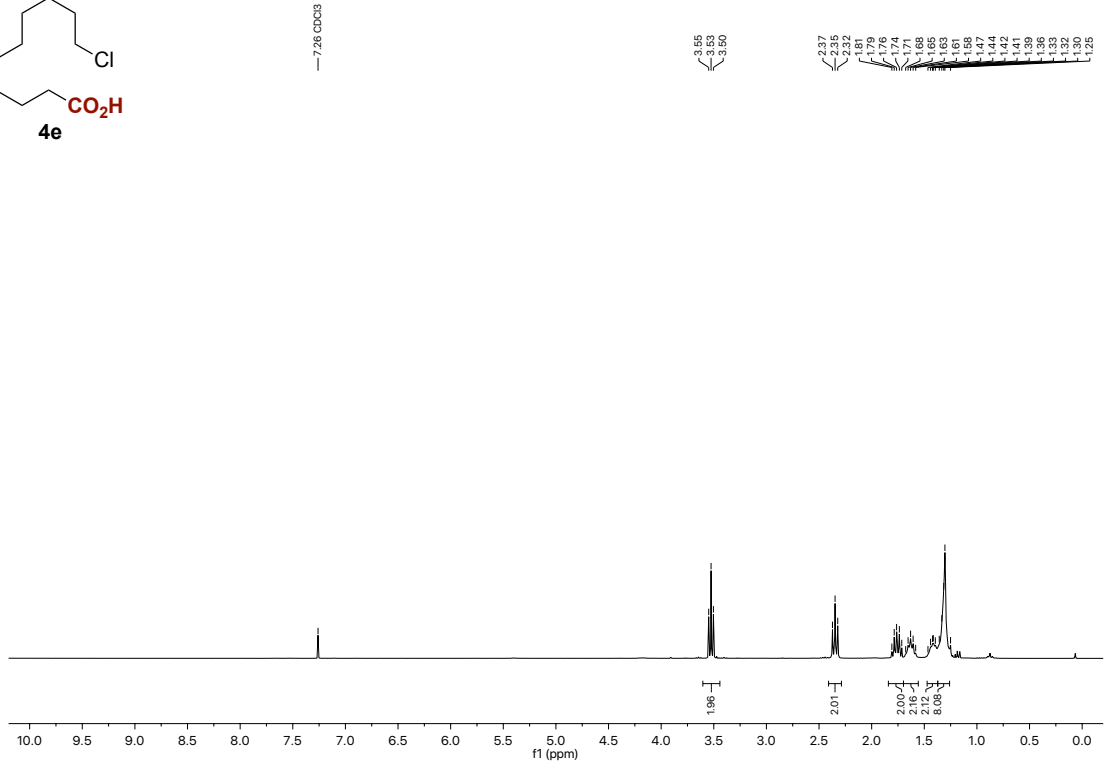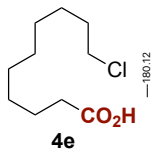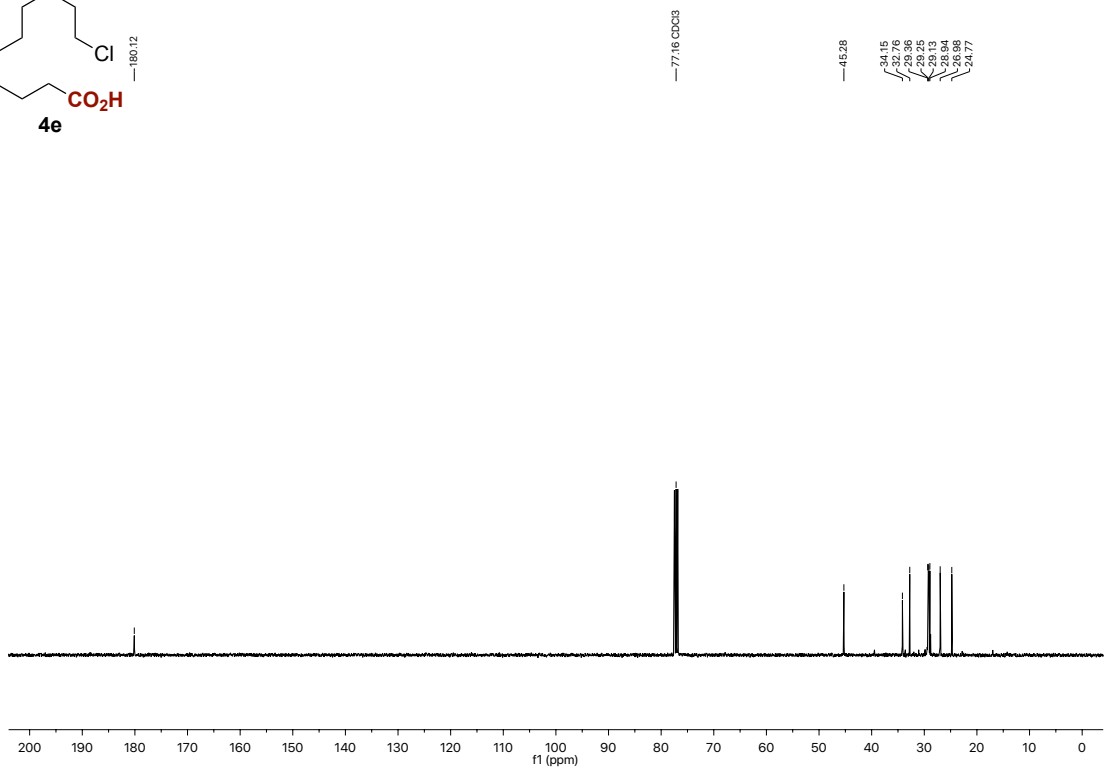

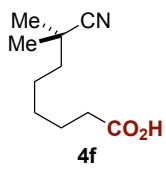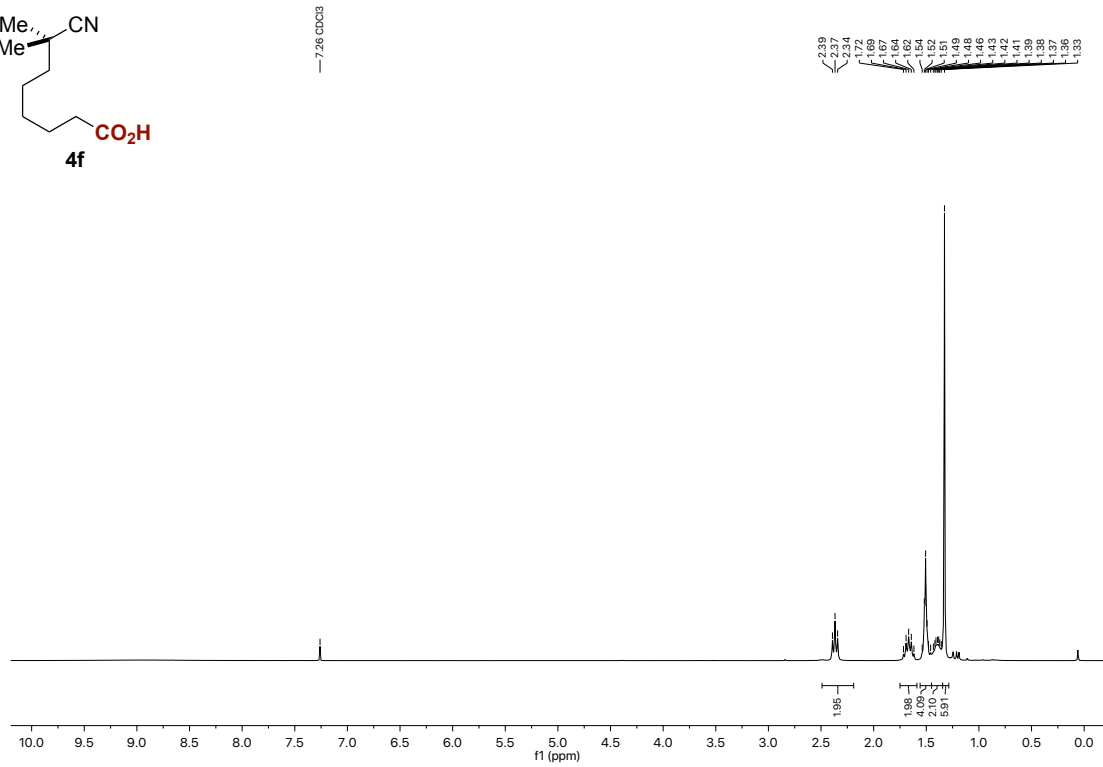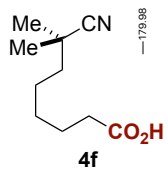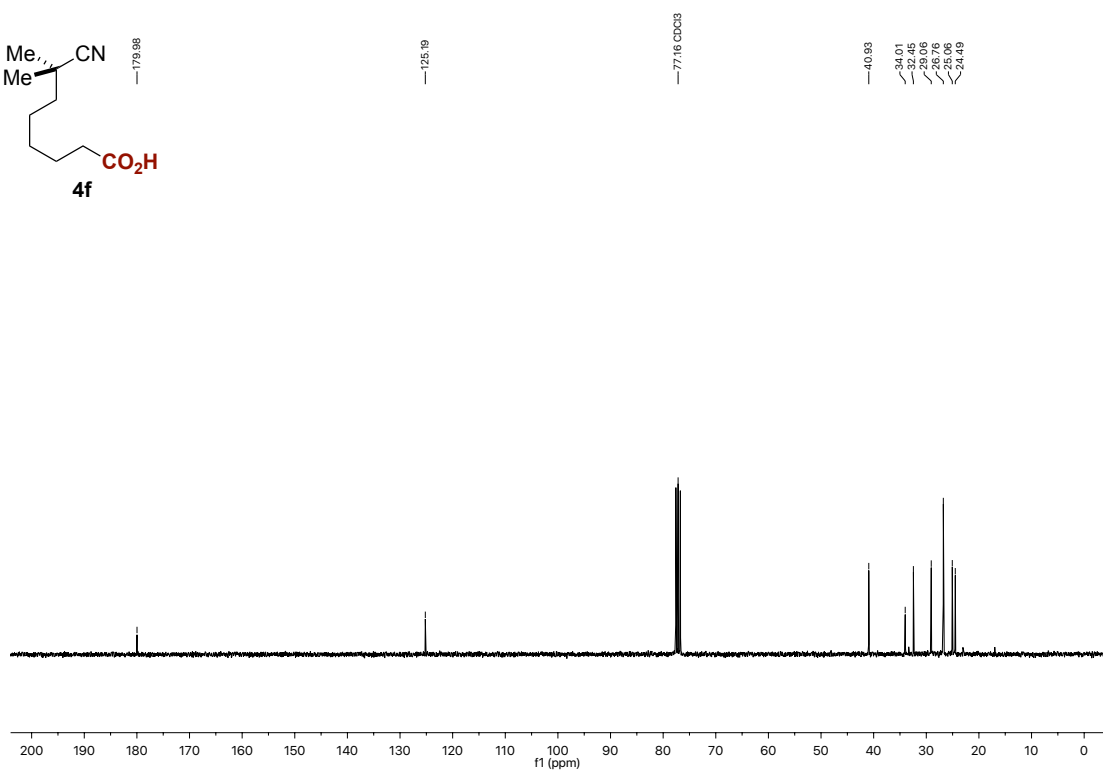



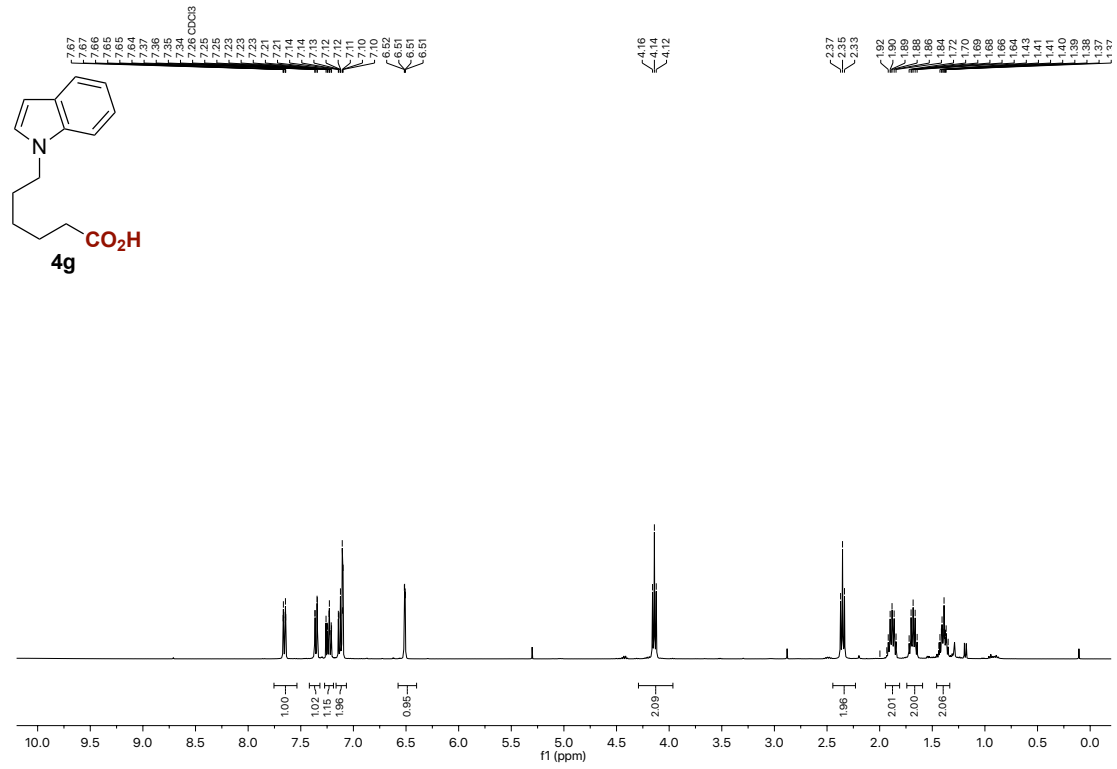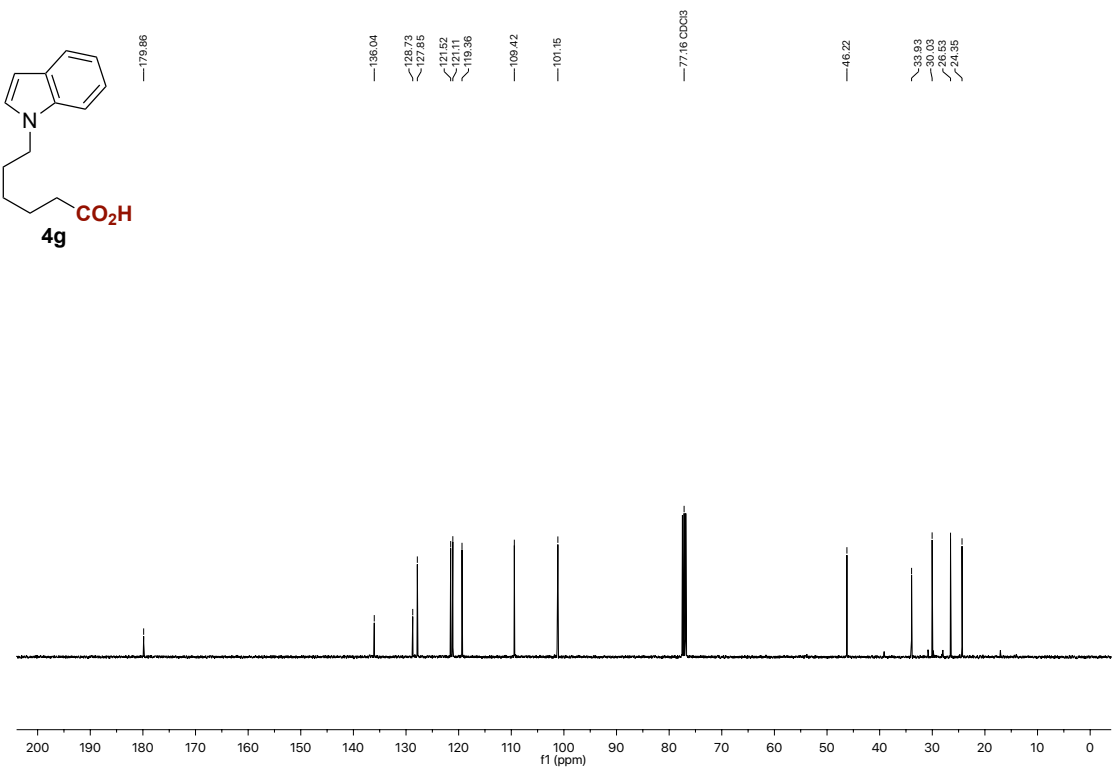

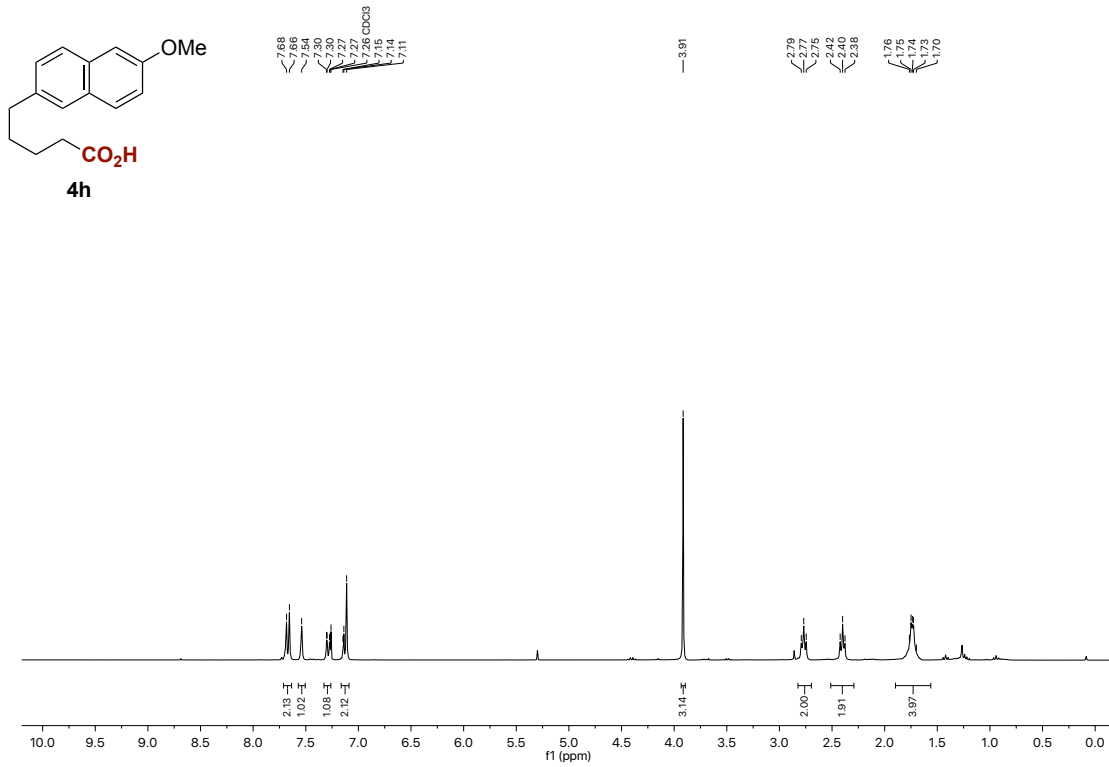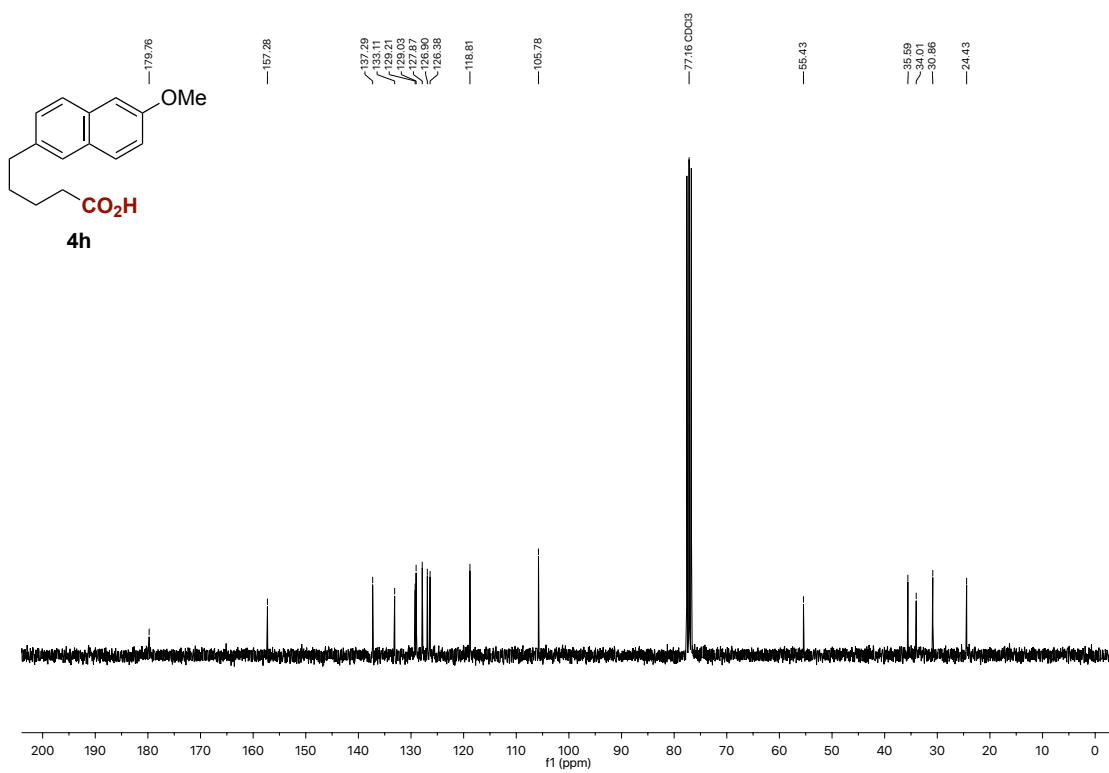

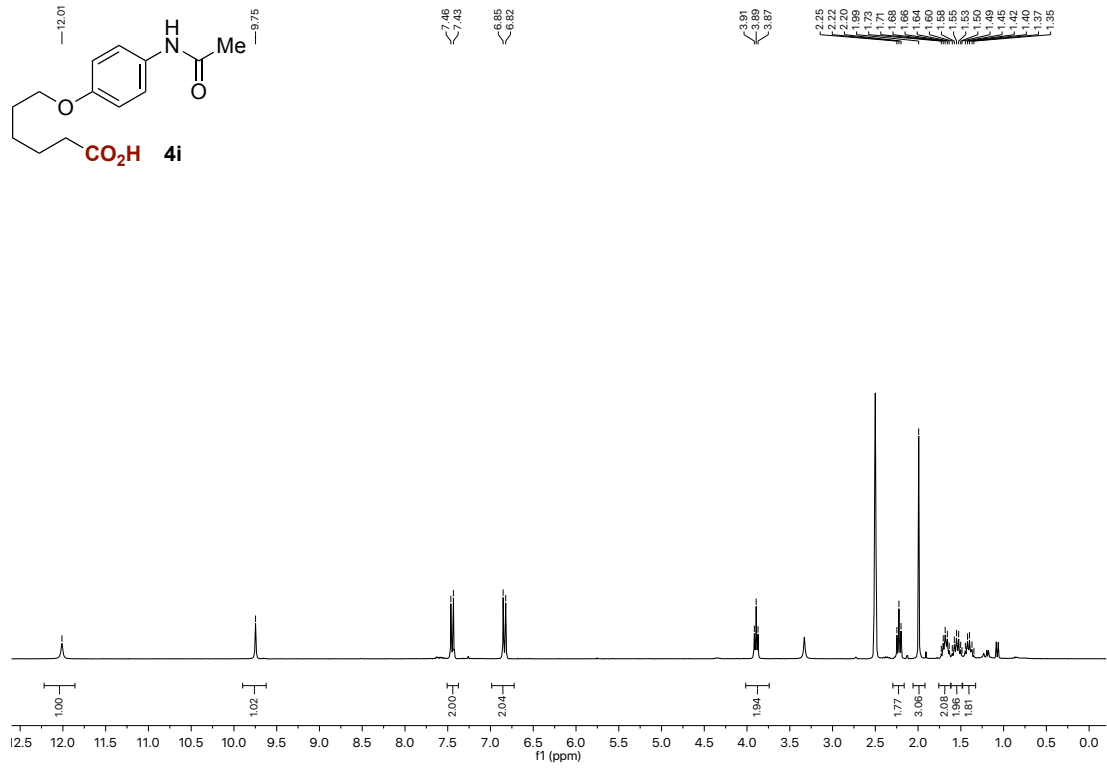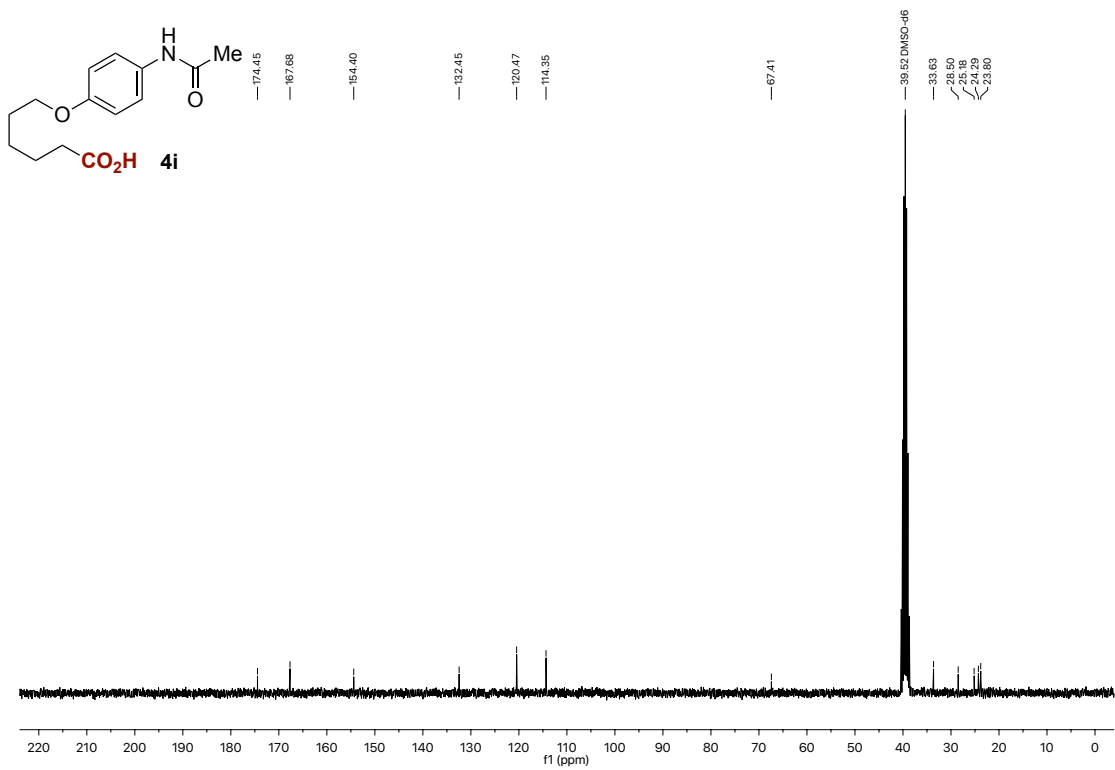

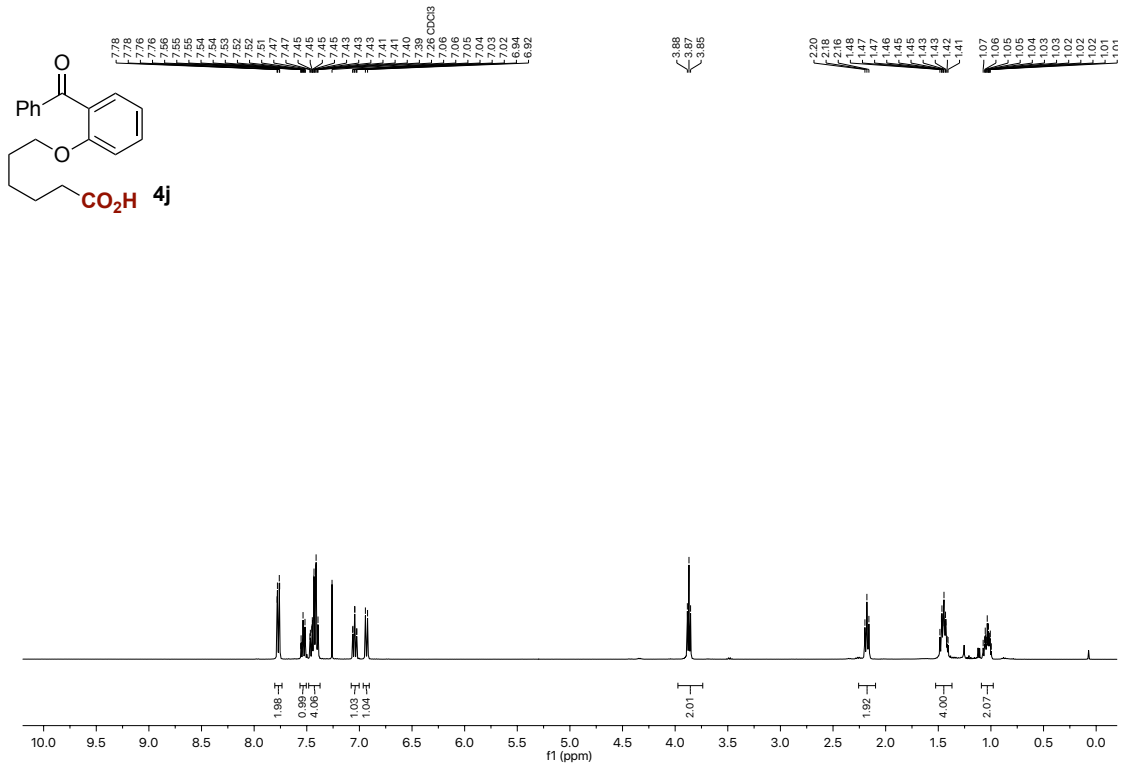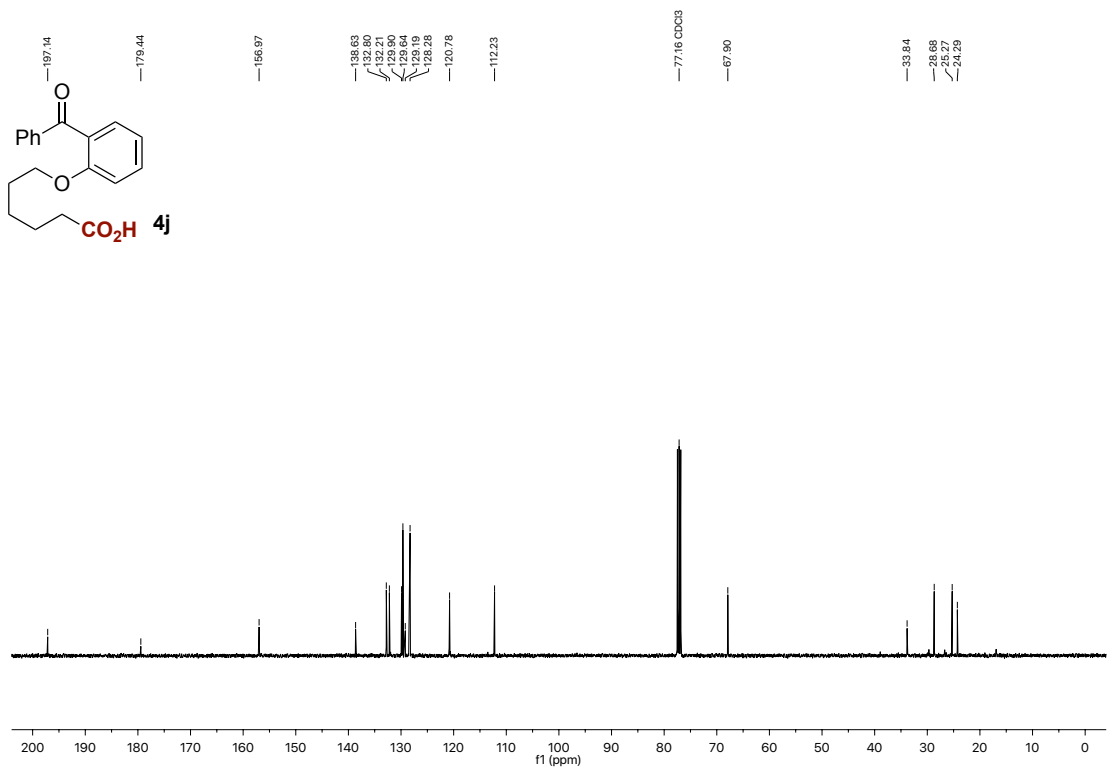

$^2\text{H}$  NMR of **4a-d<sub>3</sub>**

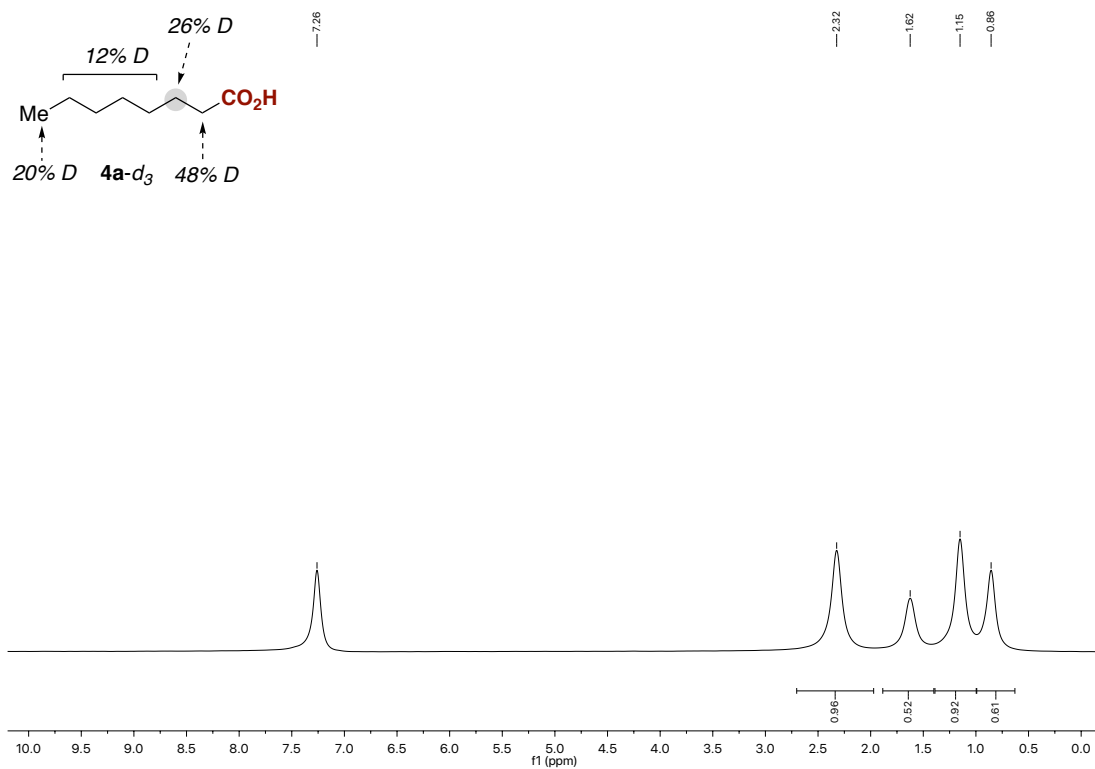

Supplement: CHEM-25-9001-s001.pdf [file CHEM-25-9001-s001.pdf]
